# Supplementary material
Source: publisher figshare collection journal article supplement (https://gsapubs.figshare.com/articles/dataset/_/21357489)
Supplement: Supplementary file 1 [file 1]

## Sheet: Table S1 (unknowns)
U-Pb Geochronological Analyses of Unknowns
								Corrected isotopic ratios									Corrected ages (Ma)						Rejected by IsoplotR?		Wang, J., Gehrels, G., Kapp, K., and Sundell, K., 2022, Evidence for regionally continuous Early Cretaceous sinistral shear zones along the western flank of the Coast Mountains, coastal British Columbia, Canada: Geosphere, v. 18, https://doi.org/10.1130/GES02502.1
Analysis	zone	U	Th	U/	206Pb/	±2s	207Pb/	±2s	206Pb/	±2s	208Pb/	±2s		%	206Pb/	±2s	207Pb/	±2s	207Pb/	±2s	Best Age	±2s
		(ppm)	(ppm)	Th	207Pb	%	235U	%	238U	%	232Th	%	Rho	disc.	238U	(Ma)	235U	(Ma)	206Pb	(Ma)	(Ma)	(Ma)
72719PK2A
6/8 SE = 0.44; 6/7 SE = 1.1
RIMS
72719PK2A 73	R	120.794	32.656	3.69899	3.94857	111.547	0.553842	111.675	0.0158677	5.3418	0.00699727	237.992	0.0478335	77.322	101.486	5.37876	447.51	409.638	3205.23	NA	101.486	5.37876
72719PK2A 45	R	120.704	32.2252	3.74564	3.27819	167.492	0.682086	167.564	0.0162241	4.90268	0.00478997	40.3387	0.0292586	80.352	103.748	5.04572	528.034	718.471	3496.03	NA	103.748	5.04572
72719PK2A 16	R	682.789	276.029	2.47361	6.67912	19.7061	0.335575	19.7587	0.0162628	1.44039	0.00637107	8.64065	0.0728993	64.6055	103.994	1.4859	293.813	50.4194	2342.72	337.967	103.994	1.4859	Y
72719PK2A 26	R	197.103	41.6139	4.73646	3.87735	33.9899	0.578743	34.1942	0.016282	3.7319	0.00586044	25.3232	0.109138	77.5446	104.115	3.85427	463.653	127.446	3233.96	540.541	104.115	3.85427
72719PK2A 27	R	216.289	98.8334	2.18842	3.21883	87.322	0.69853	87.3587	0.0163144	2.53167	0.00535319	16.9436	0.0289801	80.6064	104.321	2.6198	537.912	368.796	3524.26	NA	104.321	2.6198
72719PK2A 19	R	261.981	115.429	2.26962	3.55969	47.1223	0.631901	47.1842	0.0163211	2.41584	0.00546165	14.8892	0.0512002	79.0132	104.363	2.50095	497.28	186.035	3368.06	747.683	104.363	2.50095
72719PK2A 51	R	126.328	33.9176	3.72457	5.34655	70.1058	0.42119	70.2545	0.0163395	4.56919	0.00688116	42.5179	0.0650376	70.7258	104.48	4.73541	356.902	212.181	2716.27	1198.33	104.48	4.73541
72719PK2A 65	R	134.274	40.2841	3.33317	4.48602	71.0268	0.50246	71.2584	0.016355	5.74078	0.00563239	25.8436	0.0805628	74.7009	104.578	5.95517	413.366	243.127	3001.85	1185.65	104.578	5.95517
72719PK2A 20	R	121.037	33.5496	3.6077	5.62999	87.8317	0.400367	87.9852	0.0163551	5.19556	0.00648566	35.5419	0.0590504	69.4137	104.579	5.38963	341.915	256.781	2630.76	1547.67	104.579	5.38963
72719PK2A 59	R	168.366	39.9156	4.21805	3.90529	36.1662	0.578509	36.3075	0.0163927	3.20023	0.00519625	38.4215	0.0881424	77.3858	104.818	3.32728	463.503	135.31	3222.63	576.302	104.818	3.32728
72719PK2A 32	R	161.099	41.8975	3.84507	4.14075	45.7902	0.54628	45.8897	0.0164128	3.02036	0.00500716	28.9865	0.0658179	76.2867	104.945	3.14405	442.557	164.978	3129.89	739.39	104.945	3.14405
72719PK2A 70	R	172.229	72.0647	2.38993	4.19687	38.419	0.540498	38.5532	0.0164592	3.21492	0.00507756	22.7687	0.0833891	76.0141	105.239	3.35588	438.753	137.558	3108.46	618.588	105.239	3.35588
72719PK2A 22	R	119.593	28.5784	4.18473	3.15983	19.5782	0.719878	20.141	0.0165048	4.72786	0.0064059	33.8939	0.234738	80.8338	105.528	4.94862	550.595	85.6505	3552.77	302.323	105.528	4.94862
72719PK2A 84	R	152.186	42.0165	3.62205	3.94004	64.8285	0.577445	64.8748	0.0165082	2.45012	0.00484844	30.9573	0.0377669	77.1941	105.55	2.56503	462.818	242.279	3208.65	1057.3	105.55	2.56503
72719PK2A 29	R	256.864	73.3456	3.5021	3.84526	62.8944	0.591892	62.9569	0.0165141	2.80317	0.00380106	23.8768	0.0445252	77.6333	105.587	2.93568	472.075	238.779	3247.06	1020.73	105.587	2.93568
72719PK2A 67	R	171.742	53.1976	3.22837	3.94181	88.3004	0.578529	88.3941	0.0165466	4.06816	0.00507106	33.6644	0.046023	77.1759	105.793	4.26872	463.516	331.87	3207.94	1483.7	105.793	4.26872
72719PK2A 92	R	210.189	66.1373	3.17807	3.43155	41.3096	0.665081	41.4323	0.0165597	3.18622	0.00525088	22.4479	0.0769019	79.5494	105.876	3.3459	517.717	168.423	3425.16	650.159	105.876	3.3459
72719PK2A 13	R	176.44	65.5504	2.69167	4.06036	46.4076	0.562163	46.4898	0.0165621	2.76398	0.00611243	19.0148	0.0594535	76.621	105.891	2.90291	452.933	170.271	3161.02	747.815	105.891	2.90291
72719PK2A 37	R	143.557	35.5568	4.03739	3.52912	118.533	0.646932	118.588	0.0165658	3.60179	0.00604255	27.0496	0.0303723	79.0925	105.915	3.78367	506.589	481.834	3381.52	NA	105.915	3.78367
72719PK2A 48	R	221.262	89.1696	2.48136	3.64003	31.4305	0.627663	31.5268	0.0165775	2.46218	0.00486007	19.0963	0.0780981	78.5724	105.989	2.58832	494.639	123.597	3333.19	495.415	105.989	2.58832
72719PK2A 54	R	278.078	107.837	2.57868	3.44145	119.822	0.664048	119.842	0.0165817	2.14571	0.0049264	16.2483	0.0179045	79.4975	106.016	2.25619	517.087	495.178	3420.68	NA	106.016	2.25619
72719PK2A 12	R	317.778	151.242	2.10113	6.00018	37.3209	0.380934	37.3791	0.0165845	2.08481	0.00547131	12.8705	0.0557748	67.6456	106.033	2.19251	327.725	104.79	2524.38	632.811	106.033	2.19251
72719PK2A 71	R	123.392	49.118	2.51215	3.22784	35.2881	0.708402	35.599	0.0165913	4.69402	0.00575543	32.5222	0.131858	80.4933	106.077	4.93851	543.797	150.158	3519.95	549.685	106.077	4.93851
72719PK2A 25	R	348.378	176.238	1.97675	4.63535	41.5703	0.493553	41.6196	0.0165998	2.024	0.00497719	11.7325	0.0486309	73.9447	106.131	2.1305	407.329	139.871	2949.1	679.553	106.131	2.1305
72719PK2A 10	R	344.634	42.4525	8.1181	4.55322	50.8422	0.502767	50.8817	0.0166101	2.00412	0.00572451	34.5723	0.0393878	74.3223	106.196	2.11086	413.574	173.268	2977.93	834.378	106.196	2.11086
72719PK2A 68	R	384.418	194.825	1.97315	3.94179	34.6266	0.581189	34.6806	0.0166226	1.93397	0.00507991	10.0981	0.0557653	77.1562	106.275	2.03848	465.225	129.61	3207.95	551.973	106.275	2.03848
72719PK2A 88	R	239.187	118.094	2.02538	5.36545	49.4966	0.427019	49.5418	0.0166242	2.11491	0.00528109	14.5125	0.0426894	70.5627	106.286	2.22941	361.058	150.805	2710.44	830.845	106.286	2.22941
72719PK2A 76	R	670.464	314.522	2.13169	7.14023	36.2906	0.320887	36.3289	0.0166246	1.66846	0.00550719	9.55881	0.0459264	62.3871	106.288	1.75884	282.585	89.6709	2227.83	634.053	106.288	1.75884
72719PK2A 9	R	159.638	40.9467	3.89867	4.00439	73.2929	0.57243	73.4295	0.0166321	4.47554	0.00549934	44.3963	0.0609502	76.8627	106.335	4.72005	459.585	273.06	3183.02	1209.02	106.335	4.72005
72719PK2A 42	R	144.09	58.7908	2.4509	3.41423	21.2634	0.671541	21.5759	0.0166362	3.65907	0.00409409	26.4048	0.16959	79.6105	106.361	3.85991	521.649	88.0699	3433.02	331.365	106.361	3.85991
72719PK2A 53	R	158.916	50.2074	3.16519	4.03821	79.7402	0.568213	79.8016	0.016649	3.12941	0.00554092	32.665	0.0392148	76.7012	106.443	3.30367	456.858	295.666	3169.69	1327.46	106.443	3.30367
72719PK2A 94	R	124.754	30.9706	4.02813	5.60965	76.3232	0.409459	76.4512	0.0166661	4.42278	0.00475177	32.8662	0.0578509	69.4245	106.551	4.67379	348.486	226.448	2636.78	1323.59	106.551	4.67379
72719PK2A 6	R	190.23	76.9463	2.47224	3.31738	69.617	0.693108	69.6765	0.0166833	2.87907	0.00505136	19.1718	0.0413205	80.051	106.66	3.04557	534.666	291.611	3477.64	1118.75	106.66	3.04557
72719PK2A 14	R	752.601	494	1.52348	9.21501	28.7531	0.249529	28.8419	0.0166841	2.26165	0.0060124	6.5813	0.0784154	52.8432	106.666	2.39255	226.193	58.499	1774.68	527.572	106.666	2.39255
72719PK2A 75	R	256.644	119.645	2.14504	4.64326	50.1899	0.495378	50.2565	0.0166897	2.58612	0.00558878	17.4582	0.0514585	73.8843	106.701	2.7367	408.569	169.439	2946.35	825.466	106.701	2.7367
72719PK2A 17	R	148.842	36.1889	4.11292	3.77448	60.9557	0.609437	61.1169	0.0166907	4.43579	0.00555947	29.3167	0.0725788	77.9168	106.707	4.69434	483.205	236.046	3276.29	985.192	106.707	4.69434
72719PK2A 23	R	214.115	55.4251	3.86313	4.47809	53.8972	0.513749	53.9779	0.0166929	2.95099	0.00488112	24.7748	0.0546703	74.6486	106.721	3.1234	420.967	186.536	3004.69	884.655	106.721	3.1234
72719PK2A 43	R	194.32	52.5848	3.69536	4.3126	70.0246	0.533524	70.0688	0.0166948	2.48685	0.00622375	23.2042	0.0354915	75.4154	106.733	2.63244	434.146	248.761	3065.05	1161.6	106.733	2.63244
72719PK2A 11	R	153.659	32.7728	4.68862	4.25724	74.4819	0.540667	74.606	0.0167011	4.30227	0.00664169	25.3599	0.0576665	75.6706	106.773	4.55584	438.864	267.377	3085.69	1239.88	106.773	4.55584
72719PK2A 38	R	168.374	69.4722	2.42361	4.00361	40.8516	0.57522	40.9617	0.0167099	3.0022	0.00495286	26.477	0.0732929	76.8461	106.829	3.18079	461.385	152.164	3183.33	654.741	106.829	3.18079
72719PK2A 50	R	131.874	34.0987	3.86741	3.32028	52.3774	0.693788	52.577	0.0167143	4.5779	0.00563513	33.2444	0.0870703	80.0295	106.857	4.85148	535.074	219.523	3476.29	827.83	106.857	4.85148
72719PK2A 93	R	198.668	85.8396	2.3144	4.26994	27.7348	0.540273	27.9675	0.0167387	3.59983	0.00436724	19.9935	0.128715	75.6018	107.012	3.82044	438.604	99.6889	3080.93	445.266	107.012	3.82044
72719PK2A 55	R	271.275	126.05	2.15213	3.59102	69.6901	0.64254	69.7334	0.0167419	2.45795	0.00499415	19.598	0.0352478	78.7583	107.032	2.60907	503.877	278.721	3354.38	1130.01	107.032	2.60907
72719PK2A 2	R	143.463	35.8403	4.00285	4.22835	62.7288	0.546028	62.8696	0.0167523	4.20459	0.00566189	37.6788	0.066878	75.7912	107.098	4.46582	442.392	226.393	3096.55	1030.01	107.098	4.46582
72719PK2A 15	R	226.388	67.8148	3.33833	5.20026	61.6394	0.443989	61.7263	0.0167527	3.27453	0.0065954	19.5951	0.0530493	71.2915	107.1	3.47807	373.062	193.294	2761.9	1040.29	107.1	3.47807
72719PK2A 60	R	168.533	46.6362	3.61379	4.60866	68.133	0.501072	68.2341	0.0167557	3.71347	0.00615811	30.015	0.0544226	74.0271	107.119	3.94499	412.428	232.283	2958.42	1137.82	107.119	3.94499
72719PK2A 62	R	179.561	61.8187	2.90465	2.97097	24.0864	0.7773	24.3458	0.0167561	3.54465	0.00444415	28.6467	0.145596	81.6554	107.122	3.76572	583.942	108.216	3647.36	370.029	107.122	3.76572
72719PK2A 47	R	136.189	39.6068	3.43852	3.30156	28.2914	0.700446	28.6688	0.0167796	4.63679	0.00578422	29.9841	0.161736	80.1003	107.271	4.93277	539.057	120.049	3485.04	440.349	107.271	4.93277
72719PK2A 8	R	268.199	54.4285	4.92755	4.16336	47.5852	0.555487	47.6468	0.0167805	2.42282	0.00477011	21.5444	0.0508495	76.0855	107.277	2.57761	448.584	173.19	3121.22	769.877	107.277	2.57761
72719PK2A 36	R	147.325	35.791	4.11627	4.18139	57.5784	0.553276	57.6935	0.0167861	3.64309	0.00631912	36.082	0.0631455	76.0003	107.312	3.87712	447.141	209.404	3114.34	939.56	107.312	3.87712
72719PK2A 18	R	139.82	32.1977	4.34253	4.48686	114.716	0.51568	114.772	0.0167884	3.58452	0.00616018	45.7425	0.0312315	74.5829	107.327	3.8153	422.261	401.654	3001.55	2059.18	107.327	3.8153
72719PK2A 87	R	140.804	35.7368	3.94003	3.63141	71.6294	0.637288	71.7384	0.0167919	3.95289	0.00520252	36.2012	0.0551015	78.5571	107.348	4.20823	500.626	285.389	3336.89	1165.57	107.348	4.20823
72719PK2A 46	R	224.892	60.3998	3.72339	3.34933	71.0292	0.691049	71.0854	0.016794	2.82615	0.00457113	28.0378	0.0397571	79.8732	107.362	3.00909	533.43	297.061	3462.79	1144.5	107.362	3.00909
72719PK2A 35	R	97.4406	39.4271	2.47141	3.34749	169.503	0.691477	169.591	0.0167952	5.4606	0.00482678	32.9503	0.0321987	79.8816	107.37	5.81447	533.688	734.374	3463.64	NA	107.37	5.81447
72719PK2A 49	R	154.985	34.0291	4.55448	3.80401	65.0328	0.608897	65.1511	0.0168063	3.92549	0.0055036	35.1446	0.060252	77.7494	107.44	4.1826	482.864	251.642	3264.05	1056.35	107.44	4.1826
72719PK2A 95	R	190.073	78.8905	2.40933	2.99421	97.139	0.77395	97.169	0.0168145	2.41267	0.00546114	20.3991	0.0248296	81.5315	107.492	2.57192	582.026	437.083	3635.43	NA	107.492	2.57192
72719PK2A 66	R	115.111	30.4069	3.78567	4.13096	67.4656	0.561065	67.5684	0.0168171	3.72547	0.0072508	38.1694	0.0551363	76.2264	107.509	3.97199	452.22	247.807	3133.65	1109.87	107.509	3.97199
72719PK2A 91	R	143.526	41.1202	3.49041	4.11751	110.337	0.563224	110.383	0.0168269	3.20301	0.00553855	35.9046	0.0290173	76.2863	107.571	3.41691	453.623	409.277	3138.83	1940.61	107.571	3.41691
72719PK2A 28	R	257.065	121.709	2.11212	4.2983	54.2185	0.540797	54.2703	0.0168663	2.37215	0.00504822	12.7123	0.0437099	75.4368	107.82	2.53638	438.95	193.999	3070.36	885.325	107.82	2.53638
72719PK2A 44	R	212.429	92.4974	2.2966	4.32803	99.304	0.53721	99.3437	0.0168703	2.80945	0.00476366	19.6662	0.0282801	75.2978	107.846	3.00466	436.583	356.124	3059.34	1719.21	107.846	3.00466
72719PK2A 89	R	287.499	143.721	2.0004	4.51903	40.9791	0.514517	41.0265	0.0168707	1.97137	0.00488322	16.2788	0.0480511	74.4122	107.848	2.1084	421.482	141.751	2990.06	667.314	107.848	2.1084
72719PK2A 97	R	147.91	44.5227	3.32212	3.9408	74.1411	0.59017	74.2353	0.0168752	3.73974	0.00434947	39.9878	0.0503767	77.095	107.877	4.00074	470.976	281.543	3208.34	1221.86	107.877	4.00074
72719PK2A 3	R	168.962	40.0723	4.21642	3.77089	68.6665	0.61731	68.764	0.0168902	3.65933	0.00596396	28.9856	0.0532158	77.8818	107.972	3.91815	488.16	268.048	3277.79	1118.54	107.972	3.91815
72719PK2A 58	R	191.119	71.9156	2.65755	5.96578	52.2527	0.390203	52.3664	0.0168906	3.44809	0.00470516	25.7486	0.0658455	67.7223	107.974	3.69205	334.518	149.513	2534.03	893.706	107.974	3.69205
72719PK2A 80	R	85.2349	23.4325	3.63747	3.31203	97.6242	0.70321	97.7726	0.0168993	5.38594	0.00631052	319.936	0.0550864	80.0207	108.029	5.76992	540.706	415.593	3480.14	NA	108.029	5.76992
72719PK2A 52	R	323.77	158.701	2.04013	4.07794	36.4029	0.571242	36.4485	0.0169024	1.82302	0.00539204	12.7128	0.0500163	76.4505	108.049	1.95335	458.817	134.748	3154.17	583.315	108.049	1.95335
72719PK2A 31	R	150.327	51.473	2.9205	3.33317	28.3695	0.698976	28.6117	0.0169047	3.71527	0.0043997	35.7258	0.129851	79.9204	108.064	3.9814	538.179	119.661	3470.28	442.033	108.064	3.9814
72719PK2A 77	R	140.305	40.5865	3.45695	4.51538	66.953	0.516134	67.0321	0.01691	3.25449	0.00647025	32.0479	0.0485513	74.4187	108.098	3.4887	422.566	232.72	2991.36	1113.65	108.098	3.4887
72719PK2A 63	R	143.83	41.7605	3.44416	3.51475	24.2959	0.663077	24.5244	0.0169101	3.34009	0.00438156	41.368	0.136195	79.0708	108.098	3.58047	516.494	99.3634	3387.88	380.272	108.098	3.58047
72719PK2A 34	R	127.028	35.0171	3.62761	4.22078	57.3993	0.552301	57.5476	0.0169144	4.12885	0.00378385	39.2576	0.0717466	75.784	108.125	4.42709	446.503	208.632	3099.4	937.619	108.125	4.42709
72719PK2A 86	R	204.443	75.4377	2.71009	4.71412	57.5152	0.494579	57.5722	0.016917	2.56183	0.00537644	19.582	0.0444977	73.4963	108.142	2.74731	408.026	194.034	2921.87	953.59	108.142	2.74731
72719PK2A 96	R	140.701	54.9332	2.56131	3.43459	56.8842	0.679459	56.9764	0.0169327	3.2397	0.00483706	30.3463	0.0568605	79.4393	108.241	3.47742	526.447	235.1	3423.78	905.929	108.241	3.47742
72719PK2A 56	R	123.409	35.2248	3.50345	3.63908	69.8394	0.641286	69.9498	0.0169329	3.9279	0.00670124	29.3609	0.0561532	78.485	108.243	4.21617	503.102	279.26	3333.59	1134.38	108.243	4.21617
72719PK2A 90	R	186.35	57.8764	3.21978	4.22364	88.4908	0.553009	88.6302	0.0169475	4.96996	0.00526885	30.0985	0.0560752	75.762	108.335	5.33924	446.966	323.157	3098.32	1500	108.335	5.33924
72719PK2A 40	R	134.624	36.6152	3.67672	4.5918	39.239	0.50869	39.3984	0.0169482	3.53985	0.00550051	28.2092	0.0898476	74.0546	108.34	3.80302	417.568	135.083	2964.33	639.726	108.34	3.80302
72719PK2A 33	R	426.178	25.9353	16.4323	4.52158	48.8905	0.516707	48.9564	0.0169521	2.53901	0.00718959	31.7779	0.0518626	74.379	108.364	2.72837	422.949	169.743	2989.15	800.417	108.364	2.72837
72719PK2A 7	R	166.4	69.0187	2.41093	3.32586	44.7422	0.702696	44.8742	0.0169574	3.43992	0.0048414	18.0222	0.0766569	79.9412	108.398	3.69762	540.4	188.583	3473.69	703.267	108.398	3.69762
72719PK2A 21	R	173.809	37.7426	4.60511	5.10172	56.073	0.458352	56.1777	0.0169669	3.42845	0.0051008	40.3671	0.0610287	71.6901	108.458	3.68734	383.111	179.748	2793.26	939.03	108.458	3.68734
72719PK2A 1	R	190.062	60.8826	3.12179	4.29423	47.7892	0.544938	47.8932	0.0169793	3.15342	0.00363588	26.0111	0.0658427	75.4261	108.537	3.39397	441.675	171.94	3071.87	776.408	108.537	3.39397
72719PK2A 39	R	148.21	30.8096	4.81051	4.00779	79.5222	0.584868	79.5813	0.0170079	3.06591	0.00560718	37.8296	0.0385255	76.749	108.718	3.30525	467.585	300.37	3181.67	1322.22	108.718	3.30525
72719PK2A 61	R	183.886	62.5691	2.93893	4.11371	57.741	0.57026	57.8124	0.0170214	2.87402	0.00478526	20.4827	0.0497129	76.2533	108.803	3.10079	458.183	213.971	3140.3	940.384	108.803	3.10079
72719PK2A 4	R	154.595	65.1357	2.37343	3.10476	44.5474	0.755665	44.8014	0.0170233	4.76372	0.00417586	26.0466	0.10633	80.9598	108.816	5.14018	571.506	196.409	3579.83	694.863	108.816	5.14018
72719PK2A 85	R	240.131	97.1005	2.47301	3.67574	31.245	0.638785	31.3487	0.0170368	2.54753	0.00568516	18.6608	0.0812645	78.2873	108.901	2.75099	501.554	124.229	3317.9	493.019	108.901	2.75099
72719PK2A 57	R	139.629	35.5649	3.92603	4.31005	55.8249	0.546931	55.8947	0.0171042	2.79318	0.0059916	37.5224	0.0499721	75.32	109.328	3.02799	442.984	201.318	3066	913.137	109.328	3.02799
72719PK2A 83	R	133.706	32.4224	4.12387	4.48739	17.7921	0.525346	18.1152	0.0171051	3.40627	0.00575219	49.4926	0.188033	74.4973	109.334	3.69282	428.716	63.3712	3001.36	286.618	109.334	3.69282
72719PK2A 78	R	133.028	54.9577	2.42056	3.04216	18.9532	0.778872	19.3768	0.0171924	4.02954	0.0051125	33.1293	0.207957	81.2107	109.887	4.39043	584.84	86.1973	3611.09	291.428	109.887	4.39043
72719PK2A 81	R	201.557	67.2734	2.9961	5.44669	79.091	0.435197	79.1536	0.0171991	3.14774	0.00483056	26.329	0.0397674	70.0349	109.93	3.43097	366.86	244.891	2685.63	1370.18	109.93	3.43097
72719PK2A 82	R	138.258	23.8228	5.80359	3.40818	60.4829	0.69559	60.6416	0.0172014	4.38407	0.00641137	52.9685	0.0722948	79.4938	109.945	4.77918	536.153	253.915	3435.77	965.63	109.945	4.77918
72719PK2A 24	R	126.257	33.506	3.7682	5.23538	73.3511	0.454157	73.633	0.0172521	6.43739	0.00522521	39.9298	0.0874253	70.9969	110.266	7.03788	380.186	234.543	2750.85	1254.49	110.266	7.03788
72719PK2A 30	R	127.359	36.7053	3.46976	3.90667	37.7884	0.612596	38.1085	0.0173648	4.9286	0.00641093	27.0667	0.129331	77.1268	110.98	5.42293	485.196	147.252	3222.07	602.721	110.98	5.42293
72719PK2A 5	R	342.093	135.974	2.51587	5.14706	37.8205	0.469861	37.8774	0.0175475	2.07564	0.00562676	13.2687	0.054799	71.3271	112.138	2.30745	391.093	123.093	2778.78	626.24	112.138	2.30745	Y
MANTLES
72719PK2A 74	M	119.985	32.5558	3.68553	3.39802	35.5724	0.667287	35.7943	0.0164523	3.97901	0.00595685	25.9742	0.111163	79.7336	105.195	4.15175	519.061	145.71	3440.42	557.394	105.195	4.15175
72719PK2A 41	M	172.832	63.2811	2.73118	3.57114	67.6907	0.649722	67.7861	0.0168353	3.5954	0.00500554	22.9255	0.0530403	78.827	107.624	3.83739	508.308	272.701	3363.05	1094.47	107.624	3.83739
72719PK2A 99	M	573.636	283.12	2.02612	5.15675	42.3313	0.451295	42.3659	0.0168859	1.71041	0.00498487	9.44249	0.0403724	71.4572	107.945	1.83093	378.186	133.962	2775.69	702.961	107.945	1.83093
72719PK2A 72	M	336.348	152.878	2.2001	4.52878	52.1692	0.51761	52.2136	0.0170087	2.15424	0.00552317	13.4736	0.0412582	74.3307	108.723	2.32252	423.554	181.304	2986.6	856.399	108.723	2.32252
72719PK2A 100	M	92.4149	24.1335	3.82932	3.55463	187.712	0.671776	187.977	0.0173263	9.97498	0.00693251	45.2942	0.0530648	78.7777	110.736	10.9516	521.791	806.922	3370.28	NA	110.736	10.9516
72719PK2A 79	M	367.857	138.603	2.65404	9.85729	28.1997	0.493211	31.5505	0.0352759	14.1495	0.0126784	19.93	0.448472	45.1029	223.484	31.0801	407.096	105.911	1650.76	525.417	223.484	31.0801
CORES
72719PK2A 64	C	184.358	77.0129	2.39386	2.82705	47.3277	0.889016	47.4311	0.0182361	3.12932	0.00489462	21.2894	0.0659761	81.9618	116.498	3.61286	645.841	227.604	3723.12	732.525	116.498	3.61286
INCLUSION
72719PK2A 69	i	152.905	56.7741	2.69322	8.16789	42.602	0.296441	42.7649	0.0175686	3.72991	0.00500471	27.5121	0.0872188	57.4113	112.271	4.15134	263.617	99.3688	1991.93	766.748	112.271	4.15134
72719PK2B
6/8 SE = 0.43; 6/7 SE = 0.45
RIMS
72719PK2B 48	R	399.393	84.4368	4.73008	17.0827	10.2483	0.130137	10.4676	0.0161304	2.13143	0.0055847	17.1721	0.203621	16.9597	103.153	2.18115	124.221	12.2392	550.003	223.898	103.153	2.18115
72719PK2B 9	R	251.693	85.0949	2.9578	15.2757	10.4759	0.14568	10.7711	0.0161469	2.50439	0.00608537	14.8269	0.232511	25.2243	103.258	2.5654	138.091	13.907	789.247	220.017	103.258	2.5654
72719PK2B 46	R	357.197	60.1952	5.93398	15.1555	9.12259	0.147827	9.38609	0.016256	2.20841	0.00546178	25.2287	0.235285	25.7454	103.95	2.27723	139.992	12.2743	805.798	191.029	103.95	2.27723
72719PK2B 5	R	825.661	242.451	3.40548	18.0597	6.76142	0.124095	6.88966	0.0162612	1.32311	0.00645092	7.44729	0.192042	12.4558	103.983	1.36477	118.778	7.72293	427.253	150.833	103.983	1.36477
72719PK2B 71	R	223.01	65.2442	3.41808	13.9622	16.2219	0.160709	16.5205	0.016281	3.12711	0.00514194	23.5214	0.189286	31.2012	104.109	3.22945	151.324	23.2268	975.224	331.204	104.109	3.22945
72719PK2B 47	R	586.113	172.919	3.38953	18.6097	6.46532	0.120582	6.68485	0.0162821	1.69907	0.00546516	9.50923	0.254168	9.93411	104.116	1.7548	115.6	7.30403	359.953	145.9	104.116	1.7548
72719PK2B 92	R	305.365	108.736	2.80832	15.3899	12.7238	0.145846	13.1091	0.0162862	3.15493	0.00572835	12.1806	0.240668	24.665	104.142	3.2592	138.238	16.9427	773.597	267.942	104.142	3.2592
72719PK2B 29	R	413.595	136.94	3.02026	16.645	9.96398	0.135074	10.1149	0.0163133	1.7406	0.00597387	12.5228	0.172083	18.9145	104.314	1.80107	128.646	12.222	606.371	215.576	104.314	1.80107
72719PK2B 63	R	362.671	125.764	2.88373	16.2497	9.59177	0.138432	9.77874	0.0163218	1.90304	0.00558732	10.1595	0.19461	20.7207	104.368	1.97017	131.646	12.0739	658.156	205.777	104.368	1.97017
72719PK2B 3	R	475.884	89.3011	5.32898	16.6214	10.6011	0.135364	10.7244	0.0163253	1.62173	0.00601104	16.3175	0.151219	19.0191	104.39	1.67929	128.907	12.9831	609.431	229.29	104.39	1.67929
72719PK2B 96	R	332.411	59.5067	5.5861	17.3313	11.4556	0.129888	11.7256	0.0163338	2.50192	0.00488722	22.1996	0.213372	15.769	104.444	2.59205	123.997	13.6869	518.331	251.701	104.444	2.59205
72719PK2B 22	R	309.207	19.6899	15.7039	15.1522	12.9595	0.148576	13.1282	0.0163348	2.09798	0.00764044	33.5299	0.159807	25.7397	104.45	2.17367	140.654	17.2439	806.257	271.534	104.45	2.17367
72719PK2B 32	R	119.795	27.6253	4.33642	9.37038	20.0272	0.241088	20.6881	0.0163915	5.18758	0.00701186	22.6033	0.250752	52.2093	104.81	5.39315	219.311	40.8114	1744.1	367.837	104.81	5.39315
72719PK2B 39	R	200.599	52.0945	3.85068	13.6908	12.4316	0.165164	12.6839	0.0164071	2.51717	0.00584656	22.1008	0.198454	32.41	104.909	2.61936	155.213	18.2567	1015.09	252.097	104.909	2.61936
72719PK2B 77	R	183.24	56.2542	3.25737	12.5029	16.6168	0.180886	16.9703	0.0164098	3.44572	0.00491326	27.8167	0.203044	37.8486	104.926	3.58619	168.823	26.3962	1196.52	328.292	104.926	3.58619
72719PK2B 75	R	168.807	51.7576	3.26149	10.9055	19.4721	0.207389	19.6988	0.0164104	2.97997	0.00506685	23.8942	0.151277	45.166	104.93	3.10156	191.359	34.3597	1461.09	370.97	104.93	3.10156
72719PK2B 57	R	458.921	162.195	2.82944	18.0406	8.60621	0.12537	8.85602	0.0164109	2.08862	0.00591331	7.52516	0.235842	12.504	104.933	2.17391	119.929	10.0178	429.606	191.919	104.933	2.17391
72719PK2B 64	R	487.356	128.939	3.77975	17.5957	6.69131	0.12857	6.96231	0.0164147	1.92357	0.00576522	10.9821	0.276283	14.5386	104.957	2.00257	122.812	8.05373	485.05	147.77	104.957	2.00257
72719PK2B 27	R	533.001	214.469	2.48521	17.6072	9.27952	0.128503	9.4675	0.0164169	1.87725	0.00540825	10.1764	0.198283	14.485	104.971	1.95461	122.752	10.9466	483.595	205.039	104.971	1.95461
72719PK2B 10	R	299.846	31.0702	9.65057	14.2602	13.8019	0.158693	13.9971	0.0164199	2.32978	0.00590314	31.6712	0.166447	29.7999	104.99	2.42623	149.558	19.4658	932.037	283.595	104.99	2.42623
72719PK2B 59	R	319.883	71.984	4.44381	14.8691	10.9146	0.152257	11.1453	0.0164266	2.25599	0.00527349	23.7851	0.202416	27.0114	105.032	2.35032	143.902	14.954	845.622	227.193	105.032	2.35032
72719PK2B 8	R	265.899	120.245	2.2113	14.6862	11.8709	0.154209	12.0932	0.0164327	2.30785	0.00504917	13.729	0.19084	27.8466	105.071	2.40523	145.622	16.4061	871.344	246.14	105.071	2.40523
72719PK2B 56	R	135.357	30.4621	4.44344	9.97847	14.8043	0.227285	15.1864	0.016456	3.38493	0.00568345	27.3443	0.222892	49.4033	105.218	3.53266	207.955	28.5587	1628.07	275.619	105.218	3.53266
72719PK2B 2	R	278.864	86.2288	3.23401	14.5126	11.9301	0.156326	12.0718	0.0164613	1.84418	0.00559203	15.6507	0.152767	28.6336	105.253	1.92528	147.482	16.5716	895.893	246.413	105.253	1.92528
72719PK2B 79	R	84.1652	17.4275	4.82946	8.51242	29.2145	0.266521	29.9563	0.0164616	6.62513	0.00845438	29.9447	0.22116	56.1273	105.254	6.91661	239.908	64.0295	1918.15	526.922	105.254	6.91661
72719PK2B 16	R	322.651	134.353	2.40152	16.1377	12.2441	0.140818	12.4143	0.0164888	2.04905	0.0049707	16.0581	0.165055	21.1894	105.427	2.14267	133.772	15.5598	672.95	262.112	105.427	2.14267
72719PK2B 76	R	277.112	95.0268	2.91614	14.6962	11.9274	0.154682	12.1801	0.0164942	2.468	0.00561003	11.0102	0.202625	27.7848	105.461	2.5816	146.037	16.5679	869.902	247.384	105.461	2.5816
72719PK2B 45	R	240.254	87.2114	2.75485	13.8035	12.6146	0.16472	12.9249	0.0164977	2.81531	0.00567721	21.5491	0.21782	31.8699	105.483	2.94551	154.826	18.5607	998.458	256.508	105.483	2.94551
72719PK2B 43	R	456.719	91.5397	4.9893	16.1306	9.30229	0.14097	9.65502	0.0164992	2.58589	0.00537723	17.0145	0.267829	21.2194	105.493	2.70573	133.907	12.1127	673.924	199.041	105.493	2.70573
72719PK2B 1	R	287.427	47.237	6.08478	16.3783	13.1846	0.13884	13.3947	0.0164995	2.36334	0.00627232	25.5812	0.176438	20.0857	105.495	2.47291	132.01	16.5815	641.237	283.783	105.495	2.47291
72719PK2B 40	R	205.225	42.2996	4.85169	13.1902	13.2064	0.172703	13.9061	0.0165287	4.35553	0.0053328	20.8946	0.313211	34.6695	105.68	4.56539	161.762	20.7951	1090.18	264.82	105.68	4.56539
72719PK2B 66	R	452.998	120.686	3.75352	17.2543	11.5422	0.132033	11.6781	0.0165298	1.77634	0.00505848	15.3898	0.152109	16.0704	105.687	1.86205	125.923	13.8304	528.147	253.153	105.687	1.86205
72719PK2B 61	R	205.814	48.5733	4.23719	14.0441	16.8329	0.162299	17.1309	0.0165385	3.18107	0.00602055	22.916	0.185692	30.7578	105.742	3.33629	152.713	24.29	963.303	344.37	105.742	3.33629
72719PK2B 15	R	207.246	61.0022	3.39736	13.9773	14.5545	0.163142	14.7773	0.0165454	2.55619	0.00598594	28.8616	0.17298	31.0616	105.786	2.68202	153.45	21.0462	973.03	297.184	105.786	2.68202
72719PK2B 37	R	245.319	109.882	2.23257	15.4401	17.5489	0.147698	17.6964	0.0165468	2.27991	0.00507725	17.991	0.128835	24.3663	105.795	2.39234	139.878	23.1249	766.734	370.314	105.795	2.39234
72719PK2B 19	R	304.93	71.5745	4.26032	16.113	11.0971	0.141639	11.338	0.0165596	2.3245	0.00605109	19.377	0.205019	21.2839	105.876	2.44098	134.503	14.2833	676.239	237.397	105.876	2.44098
72719PK2B 13	R	271.683	70.087	3.87636	14.0949	13.2327	0.161969	13.5307	0.0165647	2.82443	0.00537332	19.5253	0.208742	30.5182	105.908	2.96686	152.426	19.1515	955.885	270.836	105.908	2.96686
72719PK2B 97	R	378.25	110.115	3.43506	15.7881	10.3631	0.144683	10.5377	0.0165742	1.91016	0.00507797	17.3846	0.181269	22.767	105.969	2.00762	137.206	13.5243	719.615	220.112	105.969	2.00762
72719PK2B 60	R	192.313	41.0269	4.68749	14.383	14.7939	0.158904	15.1842	0.0165833	3.4208	0.00547718	26.1649	0.225286	29.1947	106.026	3.59727	149.743	21.141	914.423	304.858	106.026	3.59727
72719PK2B 62	R	343.367	126.541	2.71349	15.5075	13.4446	0.147431	13.574	0.0165889	1.86934	0.00591477	12.2364	0.137716	24.0468	106.062	1.96644	139.641	17.7096	757.553	283.928	106.062	1.96644
72719PK2B 90	R	207.763	87.8629	2.36462	12.9109	14.4177	0.177125	14.6575	0.016593	2.64064	0.00507053	15.4277	0.180156	35.9312	106.087	2.77846	165.583	22.3956	1132.9	287.372	106.087	2.77846
72719PK2B 91	R	429.291	141.019	3.04421	15.5918	9.26908	0.14684	9.45034	0.0166123	1.84201	0.00651359	9.45086	0.194915	23.6549	106.21	1.94037	139.118	12.2864	746.104	195.985	106.21	1.94037
72719PK2B 44	R	206.818	41.9087	4.93496	12.8763	16.0222	0.17789	16.2579	0.01662	2.75829	0.00519136	26.5557	0.169659	36.0823	106.259	2.9069	166.243	24.9323	1138.25	319.172	106.259	2.9069
72719PK2B 53	R	230.003	38.6223	5.95519	14.8312	15.1166	0.15446	15.3971	0.0166219	2.92606	0.00554123	34.3471	0.190039	27.133	106.271	3.08407	145.843	20.9182	850.93	314.581	106.271	3.08407
72719PK2B 58	R	360.604	101.678	3.54652	15.183	10.1338	0.150903	10.3242	0.0166243	1.97366	0.00662128	13.0464	0.191168	25.5225	106.286	2.08053	142.709	13.7452	802.01	212.367	106.286	2.08053
72719PK2B 50	R	348.784	152.003	2.29459	15.4725	14.7544	0.148152	14.8826	0.0166324	1.9491	0.00528462	9.69794	0.130966	24.1954	106.338	2.05563	140.279	19.4997	762.315	311.454	106.338	2.05563
72719PK2B 55	R	207.112	50.5354	4.09836	13.3787	19.8115	0.171392	20.0485	0.0166377	3.07347	0.0051473	21.4391	0.153302	33.7774	106.371	3.24245	160.626	29.7873	1061.69	399.532	106.371	3.24245
72719PK2B 81	R	452.394	264.022	1.71347	17.6904	13.2162	0.129694	13.3086	0.0166473	1.56482	0.00475671	8.66418	0.11758	14.0448	106.432	1.6518	123.823	15.5142	473.187	292.667	106.432	1.6518
72719PK2B 82	R	189.146	52.5645	3.59836	15.2685	15.0848	0.150346	15.6548	0.0166562	4.18575	0.00476451	22.1762	0.267379	25.1226	106.488	4.42072	142.217	20.7756	790.231	316.961	106.488	4.42072
72719PK2B 84	R	414.146	174.418	2.37445	17.6067	8.37305	0.130438	8.86484	0.0166637	2.91162	0.00498349	8.21698	0.328446	14.423	106.536	3.07644	124.492	10.3864	483.658	185.016	106.536	3.07644
72719PK2B 70	R	213.57	49.5828	4.30734	15.0982	15.0216	0.152286	15.2328	0.0166829	2.52775	0.00464564	28.0775	0.165941	25.895	106.658	2.67386	143.928	20.442	813.768	314.444	106.658	2.67386
72719PK2B 14	R	190.491	42.5796	4.47377	16.3128	16.9787	0.141	17.1754	0.0166892	2.59185	0.00493457	37.0433	0.150904	20.336	106.698	2.74268	133.935	21.552	649.817	365.172	106.698	2.74268
72719PK2B 93	R	255.775	110.741	2.30967	14.0205	16.9162	0.164222	17.0478	0.0167064	2.11436	0.00481478	11.74	0.124026	30.8212	106.807	2.23968	154.392	24.4183	966.725	345.879	106.807	2.23968
72719PK2B 51	R	350.766	102.855	3.41028	16.2668	10.3233	0.141594	10.5001	0.0167123	1.91884	0.00614196	11.7181	0.182745	20.5403	106.844	2.03327	134.463	13.224	655.915	221.571	106.844	2.03327
72719PK2B 7	R	180.534	46.2726	3.90154	13.0583	19.6192	0.176422	19.8218	0.0167157	2.82732	0.0058007	24.8896	0.142637	35.2237	106.866	2.99653	164.977	30.1852	1110.25	392.755	106.866	2.99653
72719PK2B 100	R	277.519	97.1	2.85808	13.8532	13.6378	0.166459	13.7861	0.0167319	2.01668	0.00512182	11.4839	0.146283	31.5801	106.968	2.13941	156.341	19.9767	991.19	277.647	106.968	2.13941
72719PK2B 74	R	215.745	63.5368	3.39559	12.4942	17.9295	0.184579	18.1653	0.0167332	2.91709	0.00500859	21.6641	0.160586	37.8018	106.977	3.09486	171.994	28.7422	1197.92	354.256	106.977	3.09486
72719PK2B 99	R	392.844	189.931	2.06835	15.1239	10.9931	0.152505	11.1923	0.0167354	2.10195	0.00499807	8.36547	0.187804	25.7636	106.99	2.23032	144.121	15.0382	810.17	230.118	106.99	2.23032
72719PK2B 98	R	261.541	97.5752	2.6804	13.9228	13.5817	0.165743	13.8636	0.0167436	2.78159	0.00616851	15.4	0.200639	31.2585	107.043	2.95291	155.718	20.0149	980.993	276.93	107.043	2.95291
72719PK2B 35	R	161.351	43.71	3.69139	11.3053	19.7627	0.204212	20.0246	0.0167514	3.22755	0.00539437	25.4386	0.161179	43.2427	107.092	3.42789	188.684	34.4836	1392.35	380.072	107.092	3.42789
72719PK2B 11	R	226.95	70.3105	3.22782	14.7318	15.2946	0.156715	15.5707	0.0167515	2.9194	0.00526396	19.8086	0.187493	27.5539	107.092	3.10063	147.824	21.421	864.931	317.574	107.092	3.10063
72719PK2B 4	R	215.766	49.7741	4.3349	14.7418	15.5518	0.156627	15.8474	0.0167534	3.04653	0.00498856	25.9889	0.192242	27.5074	107.105	3.23603	147.746	21.791	863.514	323.002	107.105	3.23603
72719PK2B 21	R	237.859	62.1612	3.82649	14.4829	16.0183	0.159519	16.1693	0.0167631	2.20469	0.00546981	24.5518	0.13635	28.69	107.166	2.34315	150.282	22.5878	900.131	330.893	107.166	2.34315
72719PK2B 83	R	323.002	185.567	1.74062	15.6227	12.4611	0.147884	12.6325	0.0167635	2.07376	0.00477924	13.4253	0.164161	23.4737	107.169	2.20405	140.042	16.5253	741.918	263.801	107.169	2.20405
72719PK2B 72	R	392.105	166.489	2.35514	16.593	10.7674	0.139297	11.0353	0.0167708	2.41676	0.00495316	11.6138	0.219003	19.0327	107.215	2.5697	132.418	13.7001	613.135	232.805	107.215	2.5697
72719PK2B 52	R	330.31	37.1545	8.89017	15.6544	10.5168	0.147738	10.748	0.0167809	2.21722	0.00579581	26.5025	0.206292	23.3244	107.279	2.35892	139.912	14.0479	737.679	222.733	107.279	2.35892
72719PK2B 31	R	181.396	49.023	3.70021	12.6308	17.2595	0.18313	17.5571	0.0167834	3.21876	0.00605251	25.8041	0.183332	37.1628	107.295	3.42498	170.75	27.5953	1176.44	342.031	107.295	3.42498
72719PK2B 78	R	340.234	167.861	2.02688	17.2529	9.88524	0.134089	10.1301	0.0167859	2.21394	0.00428748	14.2057	0.21855	16.0097	107.311	2.35613	127.765	12.1618	528.315	216.794	107.311	2.35613
72719PK2B 87	R	567.233	251.071	2.25925	17.96	9.95584	0.128961	10.0532	0.0168056	1.39591	0.00475436	10.3314	0.138852	12.7702	107.435	1.48727	123.164	11.6606	439.577	221.657	107.435	1.48727
72719PK2B 85	R	241.362	75.393	3.20138	15.6553	15.9134	0.148034	16.0668	0.0168155	2.21425	0.00459634	19.1298	0.137816	23.311	107.499	2.36056	140.175	21.0369	737.554	337.26	107.499	2.36056
72719PK2B 24	R	373.876	190.917	1.95832	17.655	7.84177	0.131311	8.11796	0.0168211	2.0995	0.00528932	8.95265	0.258624	14.1616	107.534	2.23895	125.275	9.56748	477.575	173.41	107.534	2.23895
72719PK2B 88	R	319.58	108.494	2.94561	15.249	11.657	0.152248	11.8439	0.0168454	2.0958	0.00527383	13.4662	0.176951	25.162	107.688	2.23819	143.895	15.8906	792.912	244.74	107.688	2.23819
72719PK2B 68	R	300.368	78.1294	3.84449	15.6461	12.734	0.14841	12.8936	0.0168483	2.0226	0.00471062	19.6102	0.156868	23.3446	107.706	2.16037	140.507	16.9193	738.761	269.711	107.706	2.16037
72719PK2B 36	R	431.641	59.4129	7.26511	16.9087	9.46661	0.13735	9.65368	0.0168511	1.89126	0.00416993	26.8804	0.19591	17.5672	107.724	2.02041	130.681	11.8376	572.294	205.992	107.724	2.02041
72719PK2B 26	R	368.175	139.607	2.63722	16.7234	8.91807	0.139018	9.12126	0.0168687	1.91455	0.00479214	11.6234	0.2099	18.4105	107.836	2.0474	132.169	11.3039	596.216	193.25	107.836	2.0474
72719PK2B 30	R	239.098	98.1189	2.43682	15.6654	10.2147	0.148475	10.7621	0.0168766	3.38857	0.00427858	15.4798	0.314862	23.2486	107.886	3.62536	140.565	14.1275	736.184	216.411	107.886	3.62536
72719PK2B 28	R	186.108	57.3811	3.24337	13.9146	12.5538	0.167218	12.7809	0.0168826	2.39854	0.0049703	30.0091	0.187666	31.2593	107.924	2.56705	157.001	18.5924	982.198	255.883	107.924	2.56705
72719PK2B 34	R	305.951	97.4796	3.13861	16.061	10.8975	0.144934	11.0543	0.0168901	1.85545	0.00509735	15.8422	0.167848	21.4351	107.971	1.98667	137.429	14.2089	683.121	232.822	107.971	1.98667
72719PK2B 49	R	214.219	45.8355	4.67364	14.6781	14.2072	0.158776	14.4523	0.01691	2.65008	0.00620525	18.8306	0.183368	27.7575	108.097	2.84078	149.631	20.1079	872.476	294.59	108.097	2.84078
72719PK2B 20	R	226.7	53.4644	4.24021	13.3589	15.0066	0.174673	15.2181	0.016931	2.52851	0.00479541	27.5156	0.166151	33.7901	108.231	2.71378	163.466	22.9783	1064.67	302.195	108.231	2.71378
72719PK2B 86	R	309.618	95.9941	3.22539	14.1337	15.7674	0.165115	16.1988	0.0169328	3.71346	0.00479979	18.8441	0.229243	30.2433	108.242	3.98596	155.17	23.3104	950.309	323.172	108.242	3.98596
72719PK2B 69	R	208.502	69.3478	3.00661	12.9689	19.8741	0.179987	20.0673	0.0169368	2.77754	0.00509905	27.259	0.138411	35.5742	108.267	2.98206	168.05	31.0826	1123.96	397.083	108.267	2.98206
72719PK2B 33	R	203.872	74.7556	2.72719	15.9978	15.0539	0.146216	15.2168	0.0169723	2.22097	0.00427041	24.9838	0.145955	21.7029	108.493	2.38942	138.565	19.7104	691.546	321.405	108.493	2.38942
72719PK2B 25	R	227.511	89.498	2.54208	13.9251	14.7879	0.168196	15.0227	0.0169942	2.64554	0.00569809	15.5225	0.176103	31.1817	108.631	2.8498	157.852	21.9631	980.625	301.6	108.631	2.8498
72719PK2B 95	R	188.709	42.7889	4.41023	13.5634	17.9699	0.173165	18.2026	0.0170418	2.90114	0.00570125	24.6396	0.159381	32.8246	108.933	3.13375	162.162	27.2829	1034.01	363.768	108.933	3.13375
72719PK2B 23	R	214.905	65.1359	3.29934	13.9023	12.4052	0.169228	12.6397	0.0170705	2.42332	0.00561475	22.4266	0.191723	31.2657	109.115	2.62194	158.748	18.576	983.973	252.779	109.115	2.62194
72719PK2B 18	R	331.417	43.7156	7.58121	16.9542	10.1632	0.139073	10.3546	0.0171083	1.98175	0.00553961	25.609	0.191388	17.292	109.355	2.14886	132.218	12.8369	566.467	221.375	109.355	2.14886
72719PK2B 41	R	177.417	39.8451	4.45266	13.3707	24.1818	0.17664	24.4443	0.0171368	3.57258	0.00632737	20.2759	0.146152	33.6816	109.535	3.88017	165.165	37.265	1062.9	488.155	109.535	3.88017
72719PK2B 94	R	166.649	40.4087	4.12408	11.3641	16.0916	0.208235	16.4816	0.0171703	3.56458	0.00497472	25.9836	0.216276	42.8611	109.747	3.87891	192.071	28.8445	1382.39	309.604	109.747	3.87891
72719PK2B 17	R	313.038	57.3715	5.45634	15.1416	13.5472	0.157443	13.7532	0.0172975	2.37173	0.0050186	29.3143	0.172448	25.5345	110.553	2.59966	148.462	18.9964	807.725	283.84	110.553	2.59966
72719PK2B 54	R	488.626	71.6954	6.8153	16.5573	8.50248	0.144827	8.93999	0.0173991	2.76247	0.00456108	22.4239	0.309002	19.0317	111.197	3.04546	137.335	11.4837	617.784	183.598	111.197	3.04546
72719PK2B 67	R	158.382	31.4182	5.0411	14.0084	15.353	0.171724	15.9593	0.0174545	4.3571	0.00658542	27.5482	0.273014	30.6783	111.548	4.81845	160.914	23.7502	968.498	313.729	111.548	4.81845
72719PK2B 42	R	437.595	59.7911	7.31873	18.3324	9.09273	0.132152	9.27591	0.0175785	1.83433	0.0052821	18.7599	0.197753	10.8673	112.334	2.04273	126.03	10.9941	393.73	204.032	112.334	2.04273	Y
MANTLES
72719PK2B 73	M	827.577	332.815	2.4866	19.154	6.73339	0.123566	6.94732	0.017173	1.71073	0.00506085	6.75887	0.246243	7.2151	109.764	1.86187	118.3	7.75799	294.553	153.719	109.764	1.86187
72719PK2B 38	M	1083.85	234.235	4.6272	19.7357	5.16573	0.121234	5.42952	0.0173607	1.67179	0.00521595	12.159	0.307908	4.50699	110.954	1.83905	116.191	5.96105	225.846	119.427	110.954	1.83905
72719PK2B 12	M	259.658	48.2326	5.38344	14.4412	13.1314	0.167781	13.3677	0.0175807	2.50256	0.00589234	25.0042	0.187209	28.6645	112.347	2.78721	157.492	19.5022	906.066	270.841	112.347	2.78721
72719PK2B 6	M	1009.49	607.392	1.66201	18.7717	2.61349	0.307787	2.89819	0.0419219	1.25266	0.0141393	5.27045	0.432223	2.83693	264.735	3.24906	272.464	6.92582	340.413	59.1405	264.735	3.24906
CORES
72719PK2B 65	C	603.172	373.464	1.61508	18.7233	3.56784	0.298985	3.93909	0.0406181	1.66942	0.0134744	3.59915	0.423808	3.36717	256.663	4.2006	265.607	9.20606	346.2	80.6983	256.663	4.2006
72719PK2B 80	C	233.546	157.173	1.48592	16.912	10.2505	0.343206	10.3905	0.0421151	1.69979	0.0144227	5.60266	0.163592	11.2378	265.93	4.4283	299.598	26.959	571.882	223.157	265.93	4.4283
72719PK2B 89	C	180.307	109.549	1.6459	15.8319	8.19402	0.382101	8.36682	0.0438932	1.69166	0.0132896	6.42571	0.202186	15.7229	276.92	4.58534	328.583	23.4881	713.749	174.165	276.92	4.58534
72719PK2C
6/8 SE = 0.43; 6/7 SE = 0.45
MANTLES
72719PK2C 70	M	1527.23	103.726	14.7237	19.1653	3.6789	0.120544	3.95069	0.0167629	1.44003	0.00531396	14.61	0.3645	7.2689	107.165	1.53045	115.565	4.3154	293.195	83.9814	107.165	1.53045
72719PK2C 59	M	3002.03	282.762	10.6168	20.3007	2.25679	0.113848	2.76352	0.0167697	1.59497	0.00477765	7.66053	0.577152	2.07473	107.208	1.69579	109.479	2.86808	160.178	52.7841	107.208	1.69579
72719PK2C 69	M	223.355	60.5345	3.68972	14.3421	13.0928	0.161382	13.6067	0.0167941	3.70445	0.00557388	18.0973	0.272251	29.3259	107.363	3.94426	151.912	19.199	920.277	269.486	107.363	3.94426
72719PK2C 1	M	355.807	124.152	2.86588	15.3872	14.0798	0.15143	14.2639	0.0169067	2.2845	0.00556101	23.2711	0.160159	24.5136	108.077	2.44843	143.174	19.0483	773.962	296.586	108.077	2.44843
72719PK2C 56	M	807.946	140.742	5.74063	17.9362	7.08559	0.13001	7.22082	0.0169198	1.39094	0.00417148	15.6805	0.192629	12.8496	108.159	1.49188	124.107	8.43555	442.531	157.63	108.159	1.49188
72719PK2C 65	M	408.818	174.561	2.34197	14.8865	16.5807	0.156762	16.6858	0.0169325	1.86951	0.00451843	13.3094	0.112042	26.7981	108.24	2.00666	147.865	22.9611	843.229	345.547	108.24	2.00666
72719PK2C 88	M	4311.55	107.064	40.271	20.3397	3.84108	0.115008	4.03483	0.0169731	1.23528	0.00536615	22.9136	0.306154	1.84475	108.497	1.32903	110.536	4.22577	155.717	89.964	108.497	1.32903
72719PK2C 83	M	2618.58	185.885	14.0871	20.0881	2.18245	0.116513	2.50113	0.0169825	1.22171	0.00469347	9.26033	0.488464	2.99285	108.557	1.31515	111.906	2.6502	184.75	50.8584	108.557	1.31515
72719PK2C 32	M	1294.8	49.162	26.3373	19.5189	3.60569	0.119972	3.8817	0.0169912	1.43758	0.00509461	27.6791	0.370348	5.59323	108.612	1.54831	115.047	4.22208	251.28	82.9161	108.612	1.54831
72719PK2C 66	M	3307.93	237.484	13.929	19.6287	17.2573	0.11933	17.3078	0.0169954	1.32137	0.00617988	50.6902	0.0763452	5.08985	108.638	1.42349	114.465	18.736	238.375	398.565	108.638	1.42349
72719PK2C 34	M	240.711	68.5075	3.51365	13.9891	17.6578	0.16754	17.9273	0.0170057	3.0964	0.00382452	25.1207	0.17272	30.8855	108.704	3.3377	157.282	26.1225	971.299	360.846	108.704	3.3377
72719PK2C 2	M	216.634	34.7818	6.22836	15.5824	18.1655	0.150666	18.4279	0.0170348	3.09859	0.00533962	31.095	0.168147	23.5869	108.889	3.34568	142.5	24.5016	747.386	384.588	108.889	3.34568
72719PK2C 9	M	1726.63	92.3906	18.6884	19.8561	4.47732	0.11859	4.99001	0.0170856	2.20313	0.00487875	30.9939	0.441509	4.02723	109.21	2.38578	113.793	5.37168	211.734	103.805	109.21	2.38578
72719PK2C 64	M	358.125	89.8032	3.98789	17.0256	9.20033	0.138321	9.35661	0.0170875	1.70293	0.00459708	22.0812	0.182003	16.9709	109.222	1.84431	131.547	11.5445	557.31	200.764	109.222	1.84431
72719PK2C 58	M	278.115	142.671	1.94935	14.2365	18.3592	0.166555	18.5048	0.0172047	2.31692	0.00448265	12.7628	0.125207	29.7005	109.966	2.52621	156.424	26.8282	935.412	377.311	109.966	2.52621
72719PK2C 28	M	222.423	76.849	2.89429	12.5723	20.6954	0.18938	20.8649	0.0172757	2.65424	0.0049304	31.5813	0.127211	37.2997	110.415	2.90573	176.1	33.7365	1185.63	409.875	110.415	2.90573
72719PK2C 63	M	255.894	69.6187	3.67565	14.0309	13.2519	0.171216	13.4774	0.0174309	2.45524	0.00522345	18.0228	0.182175	30.5815	111.399	2.71161	160.474	20.0059	965.219	270.824	111.399	2.71161
72719PK2C 35	M	723.902	102.82	7.04047	18.4451	6.36198	0.130301	6.54441	0.0174388	1.53446	0.00439375	25.3754	0.234469	10.3879	111.449	1.69544	124.368	7.66048	379.963	143.038	111.449	1.69544
72719PK2C 39	M	2587.69	275.259	9.40093	20.2817	2.4515	0.118537	2.88027	0.017444	1.51198	0.00513578	5.38834	0.524946	1.98977	111.482	1.67109	113.745	3.09932	162.389	57.3373	111.482	1.67109
72719PK2C 31	M	1421.5	164.103	8.66225	19.3865	3.63292	0.129979	3.90403	0.0182835	1.42944	0.00489707	9.49042	0.366144	5.86735	116.799	1.65453	124.079	4.5598	266.955	83.3978	116.799	1.65453
72719PK2C 57	M	381.908	67.6172	5.64809	16.0413	10.4478	0.1595	10.6029	0.0185647	1.80713	0.00413348	23.5955	0.170437	21.0874	118.578	2.12327	150.265	14.8099	685.784	223.146	118.578	2.12327
72719PK2C 8	M	1257.4	118.532	10.6082	19.2091	4.68838	0.133529	5.01992	0.0186111	1.79405	0.00471786	15.078	0.357386	6.59417	118.872	2.11308	127.264	6.00443	287.963	107.141	118.872	2.11308
72719PK2C 90	M	1236.85	108.221	11.4289	19.5303	5.33073	0.137999	5.52757	0.0195557	1.46198	0.00773484	17.032	0.264489	4.8857	124.847	1.80768	131.26	6.80612	249.936	122.725	124.847	1.80768
72719PK2C 68	M	2366.41	252.145	9.38512	19.9452	2.83268	0.136678	3.31233	0.01978	1.71681	0.00529176	6.96241	0.518309	2.93353	126.265	2.14664	130.081	4.04414	201.358	65.8136	126.265	2.14664
72719PK2C 43	M	1780.24	94.5856	18.8214	19.4673	2.94909	0.149104	3.4342	0.0210612	1.75972	0.0103144	12.0185	0.512409	4.791	134.359	2.33987	141.12	4.52466	257.38	67.8159	134.359	2.33987
72719PK2C 54	M	2332.2	86.98	26.8131	19.358	2.71007	0.150844	2.93539	0.0211873	1.12786	0.0160319	8.19657	0.384227	5.25808	135.156	1.50849	142.657	3.90668	270.283	62.1167	135.156	1.50849
72719PK2C 14	M	1232.19	148.689	8.28704	19.2226	4.11316	0.176294	4.51316	0.0245888	1.85758	0.0108322	8.92563	0.411591	5.01892	156.592	2.87377	164.866	6.86806	286.364	94.0623	156.592	2.87377
72719PK2C 45	M	1123.87	196.327	5.72449	18.6496	4.40233	0.188613	4.6238	0.0255228	1.41386	0.0175205	4.02688	0.305779	7.39771	162.466	2.26834	175.445	7.4501	355.138	99.4104	162.466	2.26834
72719PK2C 62	M	1029.99	142.564	7.22476	18.6578	4.3465	0.206342	4.6282	0.0279342	1.59001	0.00915578	7.90757	0.34355	6.75791	177.606	2.78542	190.479	8.03825	354.153	98.1613	177.606	2.78542
72719PK2C 97	M	610.851	609.205	1.0027	18.6987	4.78933	0.228844	5.82719	0.0310483	3.31942	0.0114221	3.46511	0.569643	5.80067	197.106	6.44376	209.244	11.0188	349.222	108.256	197.106	6.44376
72719PK2C 86	M	469.94	119.183	3.94301	18.1071	5.29711	0.246428	5.59247	0.0323763	1.79341	0.0096266	7.74175	0.320683	8.16675	205.404	3.62565	223.67	11.2269	421.395	118.264	205.404	3.62565
72719PK2C 100	M	659.264	168.244	3.91849	18.2477	4.58904	0.261743	5.31657	0.0346555	2.68451	0.0101245	7.1696	0.504932	6.96873	219.62	5.79641	236.071	11.1988	404.108	102.753	219.62	5.79641
72719PK2C 99	M	1134.87	246.577	4.60249	18.4563	2.76144	0.322226	3.03079	0.0431512	1.24907	0.0170807	4.1299	0.412127	3.97624	272.336	3.33082	283.613	7.49968	378.6	62.0742	272.336	3.33082
72719PK2C 17	M	328.619	87.0509	3.77503	18.1365	6.95422	0.3345	7.08547	0.0440188	1.35749	0.011964	9.44841	0.191588	5.22194	277.695	3.68965	292.995	18.0338	417.773	155.331	277.695	3.68965
72719PK2C 78	M	145.036	113.081	1.28259	15.3599	9.85458	0.406923	10.0809	0.0453511	2.12433	0.0125411	6.77725	0.210727	17.5216	285.917	5.94109	346.657	29.6076	777.697	207.353	285.917	5.94109
72719PK2C 51	M	781.653	234.332	3.33567	19.1977	3.02019	0.34187	3.80056	0.0476208	2.30709	0.01239	6.07409	0.607041	-0.438865	299.898	6.76046	298.588	9.83175	289.333	69.0278	299.898	6.76046
72719PK2C 67	M	1285.03	439.562	2.92344	18.1975	2.12153	0.36215	2.56525	0.0478176	1.44209	0.0165257	3.29644	0.562164	4.04987	301.109	4.24242	313.818	6.92508	410.271	47.4511	301.109	4.24242
72719PK2C 61	M	501.094	93.629	5.35191	17.2338	4.14124	0.403476	4.99849	0.050453	2.79912	0.0203696	4.89864	0.559993	7.80543	317.302	8.66662	344.166	14.5911	530.741	90.7126	317.302	8.66662
72719PK2C 52	M	796.606	239.018	3.33282	18.8153	2.90272	0.370525	5.02608	0.0505842	4.10314	0.0205506	2.74897	0.816369	0.604549	318.108	12.7356	320.042	13.7974	335.139	65.7769	318.108	12.7356
INNER CORES
72719PK2C 36	C	360.957	199.212	1.81192	14.7801	18.8485	0.156513	18.9503	0.0167848	1.96229	0.00522088	14.5965	0.103549	27.3237	107.304	2.08819	147.646	26.0418	858.087	392.11	107.304	2.08819
72719PK2C 95	C	197.018	86.9903	2.26483	13.4866	15.6881	0.176941	15.9192	0.0173149	2.70293	0.00515504	22.9706	0.16979	33.1033	110.664	2.96564	165.425	24.3022	1045.5	316.872	110.664	2.96564
72719PK2C 33	C	231.955	115.749	2.00396	13.9057	16.9553	0.175712	17.1454	0.0177289	2.54553	0.00471795	17.6805	0.148467	31.076	113.286	2.85854	164.364	26.0196	983.504	345.753	113.286	2.85854
72719PK2C 3	C	519.877	97.7132	5.32044	17.4511	5.22572	0.252514	5.4912	0.031974	1.68675	0.0156926	7.25569	0.307174	11.2525	202.891	3.36898	228.616	11.241	503.216	115.047	202.891	3.36898
72719PK2C 79	C	3115.96	282.352	11.0357	19.2932	1.55717	0.248188	1.99507	0.0347436	1.24721	0.00998851	5.05255	0.625147	2.19239	220.168	2.69961	225.104	4.02801	278.012	35.6543	220.168	2.69961
72719PK2C 24	C	2397.23	1191.64	2.01171	19.468	1.77153	0.260304	2.15676	0.0367697	1.23016	0.014832	3.30347	0.570374	0.908016	232.779	2.81247	234.912	4.52312	257.281	40.7335	232.779	2.81247
72719PK2C 40	C	1380.26	240.696	5.73447	18.0235	1.90555	0.294643	2.66604	0.0385322	1.86458	0.0124508	5.08487	0.699382	7.04745	243.729	4.45968	262.208	6.16091	431.717	42.46	243.729	4.45968
72719PK2C 48	C	4610.01	446.939	10.3146	19.2375	2.78082	0.282068	3.89778	0.0393723	2.73125	0.00968375	4.48736	0.70072	1.33016	248.941	6.6696	252.297	8.7075	284.593	63.5539	248.941	6.6696
72719PK2C 74	C	164.523	192.63	0.854093	16.656	14.4813	0.337384	14.6767	0.040774	2.38692	0.0124067	5.29549	0.162633	12.7237	257.629	6.02814	295.187	37.5991	604.936	313.646	257.629	6.02814
72719PK2C 75	C	818.898	1554.5	0.526792	19.5523	2.66042	0.295911	2.98414	0.0419804	1.35177	0.0125922	3.61147	0.452984	-0.720106	265.097	3.51081	263.201	6.91889	247.369	61.2694	265.097	3.51081
72719PK2C 93	C	81.5724	26.391	3.09092	12.2345	13.9673	0.495137	14.3979	0.0439541	3.49477	0.0113998	27.2267	0.242728	32.1027	277.296	9.4854	408.405	48.4235	1239.21	274.083	277.296	9.4854
72719PK2C 85	C	1246.33	581.24	2.14426	19.2556	2.3333	0.314676	2.71711	0.043965	1.39225	0.0136109	3.74358	0.512403	0.156763	277.363	3.7797	277.799	6.60363	282.486	53.3784	277.363	3.7797
72719PK2C 7	C	1133.41	1800.93	0.629346	19.1	3.48094	0.317973	3.76182	0.0440668	1.4263	0.0128037	3.07781	0.379151	0.838423	277.992	3.88071	280.342	9.21541	301.013	79.3913	277.992	3.88071
72719PK2C 42	C	869.606	1752.06	0.496333	18.6608	3.35551	0.326796	3.699	0.0442482	1.55664	0.0129802	3.18149	0.420829	2.7881	279.112	4.25206	287.117	9.25102	353.763	75.804	279.112	4.25206
72719PK2C 91	C	128.213	71.6755	1.7888	15.8261	10.234	0.385681	10.5	0.0442884	2.34854	0.0119368	10.8652	0.22367	15.6546	279.36	6.42074	331.209	29.6767	714.541	217.548	279.36	6.42074
72719PK2C 44	C	689.894	256.453	2.69014	18.9191	4.17788	0.322804	4.40687	0.0443126	1.40207	0.0140865	4.76918	0.318156	1.6011	279.509	3.83518	284.057	10.9196	322.67	94.9069	279.509	3.83518
72719PK2C 11	C	154.981	90.0648	1.72077	16.6639	10.7176	0.368061	10.8653	0.0445026	1.78542	0.013749	9.19853	0.164323	11.7951	280.682	4.90381	318.216	29.6837	603.911	232.014	280.682	4.90381
72719PK2C 13	C	174.06	72.0617	2.41543	15.7271	16.9487	0.391414	17.058	0.0446656	1.92739	0.0137239	15.8157	0.112991	16.0148	281.688	5.31233	335.402	48.7327	727.816	359.859	281.688	5.31233
72719PK2C 53	C	4416.68	258.125	17.1106	19.1734	1.30555	0.321122	1.77614	0.0446743	1.20425	0.0132777	3.80469	0.678012	0.362055	281.741	3.31979	282.765	4.38365	292.24	29.7742	281.741	3.31979
72719PK2C 98	C	152.295	72.2069	2.10915	16.7516	8.87058	0.372107	9.02388	0.0452285	1.65627	0.0124815	10.2746	0.183543	11.2239	285.161	4.62008	321.214	24.8499	592.539	192.399	285.161	4.62008
72719PK2C 5	C	123.938	62.6358	1.9787	16.788	12.5556	0.371704	12.7075	0.0452778	1.95899	0.0122988	11.3409	0.154161	11.0469	285.464	5.47021	320.916	34.9678	587.833	272.593	285.464	5.47021
72719PK2C 16	C	307.827	129.648	2.37433	17.9736	8.14412	0.34726	8.26686	0.0452873	1.41925	0.0131542	7.77241	0.171679	5.66132	285.523	3.96386	302.658	21.6366	437.897	181.383	285.523	3.96386
72719PK2C 76	C	153.99	197.147	0.781094	15.7598	9.60107	0.396107	9.75157	0.0452951	1.70665	0.0139732	5.5679	0.175013	15.7163	285.571	4.76732	338.821	28.0948	723.418	203.797	285.571	4.76732
72719PK2C 47	C	115.444	122.137	0.945199	14.4096	12.5857	0.434625	12.7726	0.0454417	2.17746	0.0127686	5.88705	0.170478	21.8253	286.475	6.1013	366.456	39.2953	910.58	259.38	286.475	6.1013
72719PK2C 6	C	722.988	1104.95	0.654318	18.9896	3.54732	0.332884	3.85649	0.0458666	1.51294	0.0138877	3.256	0.392311	0.915417	289.095	4.27721	291.766	9.77971	314.198	80.746	289.095	4.27721
72719PK2C 84	C	1391.17	1167	1.19209	19.0766	2.36091	0.333081	2.78128	0.0461041	1.47024	0.0129708	3.24975	0.528622	0.464843	290.558	4.17707	291.915	7.05617	303.765	53.809	290.558	4.17707
72719PK2C 19	C	1307.64	1070.65	1.22135	19.1736	3.09842	0.334366	4.10832	0.0465172	2.6978	0.0134173	2.7786	0.656666	-0.071695	293.104	7.73026	292.894	10.4531	292.204	70.7844	293.104	7.73026
72719PK2C 22	C	1194.69	1045.97	1.14219	19.3229	2.35469	0.33413	2.74244	0.0468464	1.40585	0.0131824	3.30571	0.512628	-0.825708	295.131	4.05556	292.714	6.97408	274.446	53.9145	295.131	4.05556
72719PK2C 23	C	75.5213	60.558	1.24709	12.9498	18.5417	0.50008	18.7374	0.0469883	2.70059	0.0131353	10.8865	0.144128	28.1118	296.005	7.81311	411.757	63.4461	1126.9	370.217	296.005	7.81311
72719PK2C 87	C	2602.21	94.8313	27.4404	18.8528	1.39583	0.353403	2.04589	0.0483431	1.49577	0.0160818	9.31676	0.731108	0.955638	304.341	4.44644	307.277	5.42446	330.636	31.6931	304.341	4.44644
72719PK2C 18	C	682.375	202.972	3.36191	17.8628	3.7851	0.448859	4.10458	0.0581764	1.58764	0.0200637	4.34817	0.386796	3.17524	364.526	5.62676	376.48	12.9118	451.645	84.0748	364.526	5.62676
72719PK2C 80	C	669.429	257.08	2.60397	18.3914	2.97306	0.441309	3.28352	0.0588904	1.39369	0.0207333	4.30111	0.424452	0.619923	368.874	4.99665	371.175	10.2084	386.523	66.7623	368.874	4.99665
72719PK2C 77	C	618.477	155.57	3.97555	18.1176	3.19684	0.466717	3.49371	0.061354	1.40933	0.0216741	4.76571	0.403391	1.30201	383.855	5.25186	388.919	11.2883	420.101	71.3985	383.855	5.25186
72719PK2C 89	C	1828.61	150.369	12.1608	17.9558	1.54465	0.48714	2.04508	0.0634667	1.3403	0.0199658	5.67422	0.655379	1.55992	396.674	5.15636	402.96	6.80212	440.104	34.4108	396.674	5.15636
72719PK2C 20	C	817.759	226.654	3.60796	17.9003	2.43494	0.527199	2.85518	0.0684737	1.49101	0.0212005	4.00707	0.522212	0.696801	426.953	6.15967	429.949	10.008	446.982	54.1569	426.953	6.15967
72719PK2C 94	C	555.337	252.849	2.19632	17.9945	3.49721	0.524674	4.27699	0.0685042	2.46215	0.0223943	3.53152	0.575674	0.264223	427.137	10.1759	428.269	14.9448	435.311	77.8816	427.137	10.1759
72719PK2C 81	C	162.697	58.8084	2.76655	17.2337	9.71119	0.561183	9.96188	0.0701732	2.2208	0.0180973	12.8706	0.222929	3.33792	437.199	9.38738	452.296	36.3637	530.757	212.885	437.199	9.38738
72719PK2C 15	C	846.56	397.915	2.12749	17.5327	2.09086	0.559015	2.50864	0.0711146	1.38623	0.0216696	3.95689	0.55258	1.77822	442.867	5.93301	450.885	9.13366	492.938	46.1012	442.867	5.93301
72719PK2C 72	C	413.06	202.552	2.03928	17.489	3.65145	0.570542	3.95897	0.0724002	1.52983	0.0224239	4.29222	0.38642	1.69404	450.6	6.65799	458.365	14.6035	498.417	80.4187	450.6	6.65799
72719PK2C 60	C	1072.65	377.145	2.84414	17.8042	1.61463	0.563471	2.11184	0.0727917	1.3612	0.0238918	3.86175	0.644554	0.182953	452.953	5.95396	453.783	7.72815	458.936	35.8343	452.953	5.95396
72719PK2C 27	C	876.916	237.105	3.69843	17.5245	2.13298	0.581728	2.69775	0.0739695	1.65175	0.0216488	4.35207	0.612268	1.19106	460.026	7.33369	465.572	10.0745	493.962	46.9789	460.026	7.33369
72719PK2C 26	C	192.863	140.441	1.37327	16.4753	6.38341	0.629052	6.56335	0.0751981	1.52633	0.0209091	4.93869	0.232554	5.6726	467.397	6.88155	495.505	25.7354	628.493	137.6	467.397	6.88155
72719PK2C 37	C	142.617	61.505	2.31878	17.3007	6.83132	0.599216	7.07047	0.0752205	1.82334	0.0224068	7.30568	0.257881	1.93087	467.531	8.2229	476.736	26.9017	522.205	149.901	467.531	8.2229
72719PK2C 30	C	1363.73	635.546	2.14576	17.6746	1.62883	0.588117	2.08589	0.0754227	1.30302	0.0222595	3.05184	0.624681	0.196103	468.743	5.89102	469.664	7.8434	475.132	36.0436	468.743	5.89102
72719PK2C 4	C	732.9	345.826	2.11927	17.6694	2.39615	0.58859	2.82767	0.0754608	1.50138	0.023757	3.88596	0.53096	0.211675	468.972	6.79102	469.967	10.6381	475.811	53.0081	468.972	6.79102
72719PK2C 46	C	1011.55	537.131	1.88324	17.5628	1.93239	0.595659	2.47921	0.0759065	1.55318	0.0251369	3.94042	0.626481	0.596954	471.643	7.06388	474.475	9.39731	489.155	42.6193	471.643	7.06388
72719PK2C 71	C	979.325	520.704	1.88077	17.5221	2.03646	0.606884	2.5532	0.0771578	1.54002	0.0222936	3.30126	0.603171	0.510268	479.136	7.11121	481.593	9.79126	494.263	44.8848	479.136	7.11121
72719PK2C 38	C	885.591	547.802	1.61663	17.5483	2.1535	0.611372	2.56253	0.0778445	1.38887	0.021803	3.30036	0.541994	0.243745	483.244	6.46626	484.425	9.87214	490.953	47.4775	483.244	6.46626
72719PK2C 92	C	328.738	180.568	1.82058	17.9321	3.53229	0.600815	3.77967	0.0781735	1.34491	0.0220683	4.17795	0.355827	-1.5616	485.211	6.28611	477.751	14.4042	443.039	78.6009	485.211	6.28611
72719PK2C 49	C	106.854	45.72	2.33714	15.5277	9.00525	0.698629	9.1979	0.078712	1.87266	0.021399	8.81634	0.203597	9.20902	488.43	8.80873	537.972	38.4166	754.813	190.14	488.43	8.80873
72719PK2C 10	C	681.381	351.057	1.94094	17.8612	2.04618	0.608743	2.38077	0.0788921	1.21705	0.0226401	3.64762	0.511201	-1.39599	489.507	5.73699	482.767	9.14741	451.837	45.4533	489.507	5.73699
72719PK2C 12	C	264.06	122.822	2.14994	17.6477	4.72039	0.616302	5.00233	0.0789168	1.65567	0.0218889	3.68173	0.33098	-0.436302	489.654	7.80681	487.527	19.3681	478.483	104.388	489.654	7.80681
72719PK2C 21	C	484.668	298.719	1.62249	17.6971	3.36822	0.615217	3.68874	0.0789982	1.50397	0.0220407	3.26445	0.40772	-0.676905	490.141	7.09831	486.845	14.2663	472.329	74.5726	490.141	7.09831
72719PK2C 82	C	380.219	198.695	1.91358	18.064	3.0259	0.602827	3.28344	0.0790121	1.2747	0.0224648	4.01634	0.388222	-2.33742	490.223	6.0172	479.026	12.5392	426.724	67.4859	490.223	6.0172
72719PK2C 50	C	634.324	598.714	1.05948	17.6909	2.2135	0.626282	2.45914	0.0803911	1.07136	0.0226973	3.31184	0.435664	-0.947807	498.457	5.13903	493.777	9.61591	473.097	48.9741	498.457	5.13903
72719PK2C 55	C	247.974	120.175	2.06344	17.1697	4.41743	0.645952	4.65694	0.0804731	1.47424	0.0227379	4.48445	0.316568	1.39104	498.946	7.07819	505.984	18.5577	538.86	96.6679	498.946	7.07819
72719PK2C 73	C	857.45	78.5677	10.9135	14.599	1.46418	1.21166	1.96133	0.128349	1.30499	0.0350218	5.67374	0.66536	3.4139	778.44	9.56918	805.954	10.9106	883.674	30.2759	778.44	9.56918
73019PK1
6/8 SE = 0.44; 6/7 SE = 0.45
RIMS
73019PK1 35	R	910.474	177.041	5.14273	18.5844	6.90238	0.118604	7.05566	0.0159933	1.4627	0.00478986	11.4052	0.207308	10.1245	102.283	1.48429	113.806	7.59613	363.019	155.701	102.283	1.48429	Y
73019PK1 70	R	210.503	57.1313	3.68455	11.4283	24.1197	0.194932	24.3289	0.0161641	3.18338	0.00522913	28.4828	0.130848	42.837	103.367	3.26433	180.829	40.304	1371.56	465.713	103.367	3.26433
73019PK1 21	R	478.879	77.0451	6.21557	16.248	11.2208	0.137571	11.3482	0.0162186	1.69571	0.00480518	23.6254	0.149425	20.7558	103.713	1.7446	130.878	13.9352	658.393	240.723	103.713	1.7446
73019PK1 100	R	288.611	111.611	2.58586	15.8963	11.576	0.141035	11.8914	0.0162671	2.72076	0.00577225	18.8178	0.2288	22.3525	104.021	2.80744	133.965	14.9245	705.116	246.492	104.021	2.80744
73019PK1 97	R	347.049	150.717	2.30266	15.7712	10.4404	0.142385	10.6876	0.0162936	2.28515	0.00507385	17.0411	0.213814	22.9181	104.189	2.36173	135.166	13.5259	721.884	221.711	104.189	2.36173
73019PK1 74	R	367.73	130.895	2.80935	17.4952	12.8219	0.128683	13.1403	0.0163353	2.87493	0.0045991	17.7996	0.218787	15.0188	104.453	2.97876	122.914	15.2122	497.64	282.767	104.453	2.97876
73019PK1 8	R	504.402	16.0162	31.4933	17.7969	7.57013	0.126524	7.80103	0.0163382	1.88393	0.0127079	31.314	0.241498	13.6378	104.472	1.95231	120.969	8.89643	459.842	167.921	104.472	1.95231
73019PK1 16	R	359.218	29.3272	12.2486	16.3794	10.1335	0.137724	10.3077	0.016368	1.88678	0.00720407	29.9802	0.183047	20.1153	104.66	1.95877	131.014	12.6698	641.098	218.028	104.66	1.95877
73019PK1 31	R	1986.25	267.298	7.43084	19.8332	3.6188	0.113784	3.83305	0.0163743	1.26357	0.00509439	9.42105	0.329652	4.31392	104.701	1.31228	109.421	3.97608	214.442	83.8469	104.701	1.31228
73019PK1 96	R	249.682	95.0011	2.6282	14.8716	18.2117	0.15179	18.6857	0.0163791	4.18206	0.00594763	17.3491	0.223811	27.0123	104.731	4.34454	143.492	25.0053	845.275	379.567	104.731	4.34454
73019PK1 29	R	621.383	107.026	5.8059	17.4625	6.76195	0.129279	6.94435	0.0163803	1.58113	0.00470062	17.67	0.227686	15.1568	104.739	1.64268	123.45	8.0722	501.778	148.941	104.739	1.64268
73019PK1 95	R	1605.5	397.392	4.04008	19.7562	4.37682	0.114438	4.62892	0.0164044	1.50677	0.00635109	7.61796	0.325512	4.65868	104.891	1.56768	110.017	4.8264	223.442	101.219	104.891	1.56768
73019PK1 89	R	411.727	93.233	4.41611	14.7016	9.85383	0.153856	10.0336	0.0164122	1.89065	0.00586758	19.1647	0.188433	27.7817	104.941	1.968	145.31	13.5848	869.145	204.367	104.941	1.968
73019PK1 2	R	355.341	167.813	2.11748	15.7742	12.6989	0.143676	12.8954	0.0164444	2.24253	0.00415465	16.7118	0.173902	22.8647	105.145	2.33879	136.313	16.4496	721.482	269.723	105.145	2.33879
73019PK1 69	R	202.859	80.9408	2.50627	13.1053	17.375	0.173002	17.6511	0.0164507	3.10941	0.00510657	36.25	0.17616	35.0792	105.185	3.24411	162.021	26.4349	1103.11	348.045	105.185	3.24411
73019PK1 73	R	3317.92	919.578	3.60809	20.4108	6.56712	0.111148	7.10862	0.0164608	2.72128	0.00524576	10.4441	0.382814	1.65021	105.249	2.84087	107.015	7.22016	147.533	154.007	105.249	2.84087
73019PK1 37	R	148.346	46.8645	3.16543	10.5568	19.6881	0.215041	20.3079	0.0164718	4.97885	0.00436989	34.0168	0.245168	46.7479	105.319	5.20108	197.774	36.4983	1522.61	372.027	105.319	5.20108
73019PK1 63	R	134.699	41.6321	3.23547	10.4976	24.8462	0.216617	25.1358	0.0164994	3.80435	0.00408279	36.7655	0.151352	47.0119	105.494	3.98071	199.09	45.45	1533.21	469.526	105.494	3.98071
73019PK1 75	R	360.647	157.667	2.28739	16.0092	12.2922	0.142112	12.4842	0.0165078	2.18145	0.00469675	9.7725	0.174736	21.7727	105.547	2.28371	134.924	15.7734	690.06	262.413	105.547	2.28371
MANTLES
73019PK1 17	M	604.928	204.63	2.9562	17.84	7.98532	0.124975	8.11532	0.0161772	1.44677	0.00422343	10.5172	0.178276	13.4826	103.451	1.48474	119.572	9.15414	454.504	177.306	103.451	1.48474
73019PK1 20	M	662.146	135.668	4.88062	18.8712	7.5215	0.118501	7.66198	0.0162259	1.46049	0.00426798	16.0435	0.190616	8.75266	103.759	1.50327	113.712	8.24249	328.417	170.702	103.759	1.50327
73019PK1 62	M	397.193	95.1436	4.17467	16.2309	7.87271	0.139264	8.19132	0.0164009	2.26234	0.00477739	19.5621	0.276187	20.7862	104.869	2.3533	132.388	10.1672	660.651	168.756	104.869	2.3533
73019PK1 50	M	567.983	72.1001	7.8777	17.5906	7.31408	0.129247	7.52976	0.0164964	1.78928	0.00460736	22.8946	0.237627	14.5405	105.475	1.87188	123.421	8.75076	485.653	161.551	105.475	1.87188
73019PK1 66	M	869.486	167.44	5.19282	17.8477	6.67801	0.127447	6.90685	0.0165043	1.76319	0.00505419	13.1875	0.255281	13.3624	105.525	1.84546	121.801	7.92766	453.525	148.317	105.525	1.84546
73019PK1 52	M	276.673	90.1973	3.06742	15.1237	11.2022	0.150901	11.6056	0.0165591	3.0334	0.00464806	22.7651	0.261373	25.8111	105.873	3.18531	142.707	15.4511	810.201	234.51	105.873	3.18531
73019PK1 12	M	659.429	40.1377	16.4292	17.6303	8.99993	0.129784	9.14256	0.0166023	1.60864	0.0061349	56.6749	0.175951	14.3313	106.147	1.69354	123.904	10.6642	480.664	198.938	106.147	1.69354
73019PK1 77	M	453.455	25.7131	17.6352	15.4751	8.08537	0.147982	8.42842	0.0166162	2.38015	0.00880409	30.9723	0.282395	24.1878	106.235	2.50782	140.129	11.032	761.962	170.477	106.235	2.50782
73019PK1 92	M	1677.65	110.058	15.2432	20.1941	3.20547	0.113487	3.50578	0.0166287	1.41967	0.00480127	16.8353	0.40495	2.59836	106.314	1.49692	109.15	3.62807	172.474	74.8603	106.314	1.49692
73019PK1 45	M	506.793	47.934	10.5727	15.9439	9.05914	0.143847	9.24273	0.0166411	1.83308	0.00470789	31.1413	0.198326	22.0364	106.392	1.93425	136.464	11.8023	698.756	193.044	106.392	1.93425
73019PK1 6	M	555.486	58.3134	9.52588	16.2642	8.23004	0.141625	8.3794	0.0167133	1.57507	0.00428337	25.4518	0.187969	20.5518	106.85	1.66909	134.491	10.5551	656.232	176.552	106.85	1.66909
73019PK1 85	M	2834.02	423.626	6.68991	20.4385	2.61286	0.112905	3.03776	0.0167437	1.54951	0.0048649	5.58944	0.510083	1.45125	107.043	1.64495	108.619	3.12924	144.32	61.302	107.043	1.64495
73019PK1 28	M	169.961	86.3607	1.96803	14.8467	19.0234	0.156289	19.4144	0.0168363	3.87691	0.00567147	23.0529	0.199692	27.0053	107.63	4.13809	147.449	26.6465	848.746	396.364	107.63	4.13809
73019PK1 23	M	1173.96	295.518	3.97255	19.2562	3.88662	0.120987	4.13634	0.0169043	1.41546	0.00426895	8.19142	0.342201	6.81689	108.062	1.51682	115.967	4.53301	282.413	88.9581	108.062	1.51682
73019PK1 82	M	370.803	61.6207	6.0175	16.1404	9.7528	0.145527	10.0551	0.017043	2.4471	0.0048544	24.7059	0.243368	21.0316	108.941	2.64348	137.955	12.9706	672.593	208.694	108.941	2.64348
73019PK1 4	M	1120.7	56.9882	19.6655	19.2814	5.9639	0.121976	6.25443	0.0170647	1.88407	0.00585997	32.7378	0.301238	6.66049	109.078	2.03782	116.861	6.90412	279.422	136.546	109.078	2.03782
73019PK1 90	M	1835.12	492.677	3.72479	20.1946	2.88663	0.116915	3.24661	0.0171314	1.48587	0.00569365	4.52001	0.457669	2.46779	109.501	1.6133	112.271	3.45073	172.421	67.3872	109.501	1.6133
73019PK1 88	M	1906.05	248.333	7.67539	20.2178	4.00779	0.116818	4.21114	0.0171368	1.29281	0.00463005	12.9302	0.306997	2.36022	109.535	1.40412	112.183	4.47256	169.739	93.6379	109.535	1.40412
73019PK1 94	M	934.055	138.637	6.73743	18.8412	4.83601	0.126138	5.07579	0.0172443	1.54162	0.00580914	18.6012	0.303721	8.62683	110.216	1.68467	120.622	5.77284	331.986	109.634	110.216	1.68467
73019PK1 93	M	788.342	146.019	5.39889	17.9802	6.7067	0.132529	6.86869	0.0172899	1.48292	0.00502253	11.6667	0.215895	12.5526	110.505	1.62474	126.368	8.16147	437.084	149.357	110.505	1.62474
73019PK1 1	M	460.585	101.266	4.54826	16.5657	10.3318	0.144664	10.704	0.0173884	2.79831	0.00588931	20.13	0.261426	18.996	111.129	3.08309	137.19	13.7362	616.688	223.233	111.129	3.08309
73019PK1 41	M	496.692	16.1229	30.8066	16.9687	8.5179	0.141763	9.01103	0.0174542	2.94007	0.0137217	46.1737	0.326275	17.1355	111.546	3.25134	134.613	11.3605	564.56	185.556	111.546	3.25134
73019PK1 68	M	775.001	47.8734	16.1885	18.1442	5.46348	0.135065	5.74279	0.0177815	1.7692	0.00685625	25.9911	0.308074	11.6755	113.62	1.99255	128.639	6.93868	416.833	122.064	113.62	1.99255
73019PK1 14	M	1398.54	88.5938	15.786	20.0902	3.69206	0.123876	3.93318	0.0180577	1.35596	0.00701065	14.1633	0.344749	2.7084	115.369	1.55044	118.58	4.40194	184.496	85.9723	115.369	1.55044
73019PK1 57	M	647.749	113.529	5.70558	18.034	6.2434	0.139919	6.5547	0.0183086	1.99601	0.00567563	14.1262	0.304516	12.0433	116.957	2.31343	132.971	8.16934	430.427	139.22	116.957	2.31343
73019PK1 33	M	1205.13	145.463	8.28477	19.0481	3.88748	0.135216	4.24189	0.0186882	1.6974	0.00599821	13.6493	0.400152	7.3102	119.36	2.00737	128.773	5.13025	307.164	88.5607	119.36	2.00737
73019PK1 72	M	536.906	77.8914	6.89302	18.3703	7.34936	0.149047	8.38792	0.0198668	4.04278	0.0113648	20.4858	0.481977	10.1056	126.814	5.07673	141.07	11.0478	389.092	165.046	126.814	5.07673
73019PK1 43	M	609.51	52.7135	11.5627	17.4532	6.34751	0.161504	6.63239	0.0204524	1.92294	0.00914938	21.3248	0.289932	14.1454	130.515	2.48449	152.018	9.36407	502.956	139.742	130.515	2.48449
73019PK1 81	M	620.931	73.0651	8.49832	18.1804	5.46314	0.189052	6.48301	0.0249386	3.49049	0.00666873	17.6403	0.538406	9.68466	158.793	5.47493	175.82	10.4663	412.381	122.163	158.793	5.47493
73019PK1 47	M	490.827	27.8868	17.6007	17.6733	7.05275	0.215973	7.99642	0.0276951	3.76849	0.0128644	29.368	0.471272	11.3047	176.107	6.54673	198.552	14.4214	475.308	156.04	176.107	6.54673
73019PK1 76	M	1239.76	305.567	4.05723	18.9075	3.05087	0.22541	4.02107	0.030924	2.6194	0.0109793	4.0953	0.651417	4.88071	196.329	5.0651	206.403	7.51044	324.032	69.2539	196.329	5.0651
73019PK1 83	M	362.028	34.6495	10.4483	17.2781	6.50031	0.28791	7.17783	0.0360943	3.0442	0.0158035	16.2735	0.424111	11.0289	228.578	6.83645	256.913	16.2931	525.083	142.588	228.578	6.83645
73019PK1 11	M	1682.5	562.374	2.99178	18.5133	2.09084	0.381131	3.3146	0.0511971	2.57195	0.0147487	3.34153	0.775947	1.83082	321.867	8.075	327.87	9.28759	371.663	47.0824	321.867	8.075
73019PK1 10	M	632.828	317.343	1.99415	18.6792	2.54117	0.446984	2.89189	0.0605812	1.38039	0.0175305	3.4881	0.47733	-1.06457	379.159	5.08291	375.165	9.07074	351.583	57.383	379.159	5.08291
73019PK1 53	M	391.396	151.473	2.58394	17.9844	4.07937	0.482986	4.30627	0.0630257	1.37936	0.0179758	4.8551	0.320314	1.52941	394	5.27192	400.12	14.2408	436.564	90.8723	394	5.27192
73019PK1 79	M	544.378	240.277	2.26563	18.0193	3.27676	0.501503	3.65602	0.065569	1.62151	0.0188631	4.11457	0.443517	0.803023	409.405	6.43212	412.719	12.3991	432.244	73.0286	409.405	6.43212
73019PK1 19	M	362.29	171.871	2.10792	18.1541	4.38725	0.503699	4.62497	0.066349	1.4637	0.0206059	4.19473	0.316478	0.0196186	414.122	5.87091	414.203	15.7311	415.608	98.0679	414.122	5.87091
CORES
73019PK1 30	C	1986.72	624.124	3.18321	19.8419	3.15391	0.116938	3.48918	0.0168356	1.49239	0.00596655	4.42501	0.427718	4.15588	107.626	1.59286	112.293	3.70922	213.429	73.0676	107.626	1.59286
73019PK1 24	C	443.867	16.6913	26.5927	16.0434	10.8179	0.145072	10.9552	0.0168876	1.72908	0.0109063	54.5054	0.157831	21.5162	107.955	1.85109	137.551	14.0932	685.5	231.052	107.955	1.85109
73019PK1 98	C	3347.03	968.87	3.45457	20.2094	1.99987	0.115296	2.35258	0.0169066	1.23903	0.0057788	4.42491	0.526667	2.4573	108.076	1.32793	110.798	2.46945	170.704	46.7317	108.076	1.32793
73019PK1 60	C	2337.78	627.139	3.72769	20.2898	2.96321	0.115189	3.24434	0.016958	1.32102	0.00505015	4.21636	0.407176	2.07675	108.402	1.42003	110.701	3.40266	161.457	69.3042	108.402	1.42003
73019PK1 67	C	710.733	124.071	5.72845	17.7115	7.43196	0.132893	7.78062	0.0170783	2.30304	0.00509762	13.4645	0.295997	13.8359	109.164	2.49294	126.694	9.26744	470.539	164.567	109.164	2.49294
73019PK1 64	C	2601.84	561.261	4.63571	20.0365	2.44172	0.117946	2.8012	0.0171472	1.37285	0.00529669	5.26027	0.490093	3.18634	109.601	1.49194	113.208	3.0008	190.773	56.7639	109.601	1.49194
73019PK1 25	C	2840.16	892.65	3.18171	20.5118	2.33833	0.115342	2.77044	0.0171664	1.48577	0.00539886	3.6345	0.536296	1.00849	109.723	1.61644	110.841	2.9091	135.95	54.921	109.723	1.61644
73019PK1 44	C	1688.43	405.017	4.16878	19.7176	3.89129	0.120218	4.21382	0.0171993	1.61683	0.00514091	6.2124	0.383696	4.63129	109.931	1.76233	115.27	4.59171	227.953	89.914	109.931	1.76233
73019PK1 26	C	3299.06	1226.92	2.68889	20.4585	2.27437	0.115942	2.72229	0.0172109	1.49602	0.00555049	3.1865	0.549545	1.24068	110.005	1.63173	111.386	2.87186	142.06	53.3394	110.005	1.63173
73019PK1 18	C	92.0624	27.7322	3.31969	8.98614	30.4172	0.264402	30.9937	0.0172395	5.95005	0.00799753	34.2677	0.191976	53.7438	110.186	6.5004	238.208	65.8315	1820.45	555.341	110.186	6.5004
73019PK1 13	C	2255.99	522.72	4.31587	20.0804	2.63516	0.118664	2.95082	0.0172894	1.32788	0.00520308	5.60488	0.450003	2.94936	110.502	1.45482	113.86	3.17828	185.635	61.3337	110.502	1.45482
73019PK1 34	C	851.451	159.49	5.33857	18.5684	5.79086	0.128474	5.95686	0.0173092	1.39649	0.0053354	12.2548	0.234434	9.85756	110.627	1.53172	122.725	6.88607	364.964	130.532	110.627	1.53172
73019PK1 65	C	1605.29	459.721	3.49188	20.0212	3.01054	0.119192	3.26617	0.017315	1.26668	0.00508624	4.80924	0.387819	3.2134	110.665	1.38981	114.339	3.53191	192.55	70.0102	110.665	1.38981
73019PK1 71	C	2409.79	4.54382	530.345	19.9795	2.79653	0.119949	3.18324	0.0173887	1.52067	0.0391828	68.7711	0.477713	3.38537	111.132	1.67546	115.026	3.46176	197.355	64.9758	111.132	1.67546
73019PK1 59	C	1054.81	126.632	8.32968	18.9088	5.28454	0.128919	5.50845	0.0176876	1.55454	0.00416439	16.882	0.282211	8.20379	113.025	1.74171	123.126	6.38726	323.882	120.009	113.025	1.74171
73019PK1 78	C	370.77	75.9298	4.88307	17.9495	10.9653	0.13786	11.1842	0.0179547	2.20172	0.00638205	25.2159	0.19686	12.5206	114.717	2.50339	131.136	13.7591	440.876	244.063	114.717	2.50339
73019PK1 32	C	6837.02	1010.91	6.76327	20.3322	1.55755	0.144781	2.41335	0.0213591	1.84345	0.0066428	3.72906	0.763853	0.767209	136.24	2.48515	137.293	3.09912	156.56	36.4357	136.24	2.48515
73019PK1 38	C	252.135	57.1028	4.41546	16.0785	8.09055	0.314522	8.62159	0.036693	2.97905	0.0178438	11.0139	0.345534	16.3418	232.302	6.79718	277.68	20.9467	680.799	172.874	232.302	6.79718
73019PK1 86	C	980.242	223.856	4.37889	18.5951	2.83997	0.275525	5.07237	0.0371747	4.2028	0.0190548	5.09214	0.828566	4.77715	235.297	9.71074	247.101	11.1254	361.72	64.0646	235.297	9.71074
73019PK1 22	C	949.263	315.954	3.00444	18.1401	3.10836	0.296534	3.8961	0.0390302	2.34898	0.0200956	3.38988	0.602906	6.39778	246.819	5.68815	263.689	9.04801	417.339	69.4392	246.819	5.68815
73019PK1 54	C	552.613	157.326	3.51254	17.9379	4.1577	0.330851	4.59464	0.0430618	1.95555	0.0187111	6.09927	0.425616	6.35095	271.784	5.2044	290.215	11.5982	442.314	92.4877	271.784	5.2044
73019PK1 7	C	198.92	71.1488	2.79583	17.0866	8.3031	0.385214	8.51654	0.0477578	1.89475	0.0199287	9.11368	0.222479	9.1052	300.741	5.56742	330.867	24.0491	549.47	181.384	300.741	5.56742
73019PK1 87	C	753.927	302.321	2.4938	18.4071	2.63003	0.357715	3.96419	0.047776	2.9661	0.0198344	3.216	0.748223	3.10921	300.853	8.71857	310.507	10.6052	384.605	59.0677	300.853	8.71857
73019PK1 36	C	305.78	136.407	2.24167	17.1212	5.53369	0.436899	6.4947	0.0542754	3.3999	0.0179023	5.38813	0.523489	7.42992	340.717	11.2832	368.064	20.052	545.055	120.935	340.717	11.2832
73019PK1 55	C	340.643	136.71	2.49172	17.7572	4.95157	0.435388	5.13856	0.0560969	1.37359	0.0181357	5.83173	0.26731	4.12813	351.845	4.70339	366.995	15.8266	464.813	109.715	351.845	4.70339
73019PK1 15	C	334.051	173.654	1.92366	17.5676	5.35963	0.450468	5.52634	0.0574201	1.34717	0.0172211	4.54872	0.243773	4.68486	359.917	4.71582	377.607	17.4275	488.557	118.319	359.917	4.71582
73019PK1 5	C	181.347	76.1753	2.38065	17.1114	7.88676	0.479176	8.04344	0.0594934	1.57984	0.0195847	8.25985	0.196414	6.27997	372.544	5.71878	397.507	26.4589	546.293	172.41	372.544	5.71878
73019PK1 9	C	482.755	306.391	1.57562	18.2212	3.69896	0.452533	4.58561	0.0598297	2.71027	0.0182451	3.32822	0.591037	1.17725	374.589	9.86305	379.052	14.5064	407.356	82.7783	374.589	9.86305
73019PK1 91	C	409.38	166.563	2.45781	17.9747	3.81841	0.487325	4.56287	0.0635577	2.4979	0.0250144	5.73569	0.54744	1.45382	397.226	9.62276	403.086	15.1806	437.758	84.9996	397.226	9.62276
73019PK1 3	C	468.021	164.218	2.84999	17.8902	3.52163	0.490411	3.92552	0.0636595	1.73432	0.0196773	5.17707	0.441806	1.81354	397.842	6.69125	405.191	13.1156	448.241	78.263	397.842	6.69125
73019PK1 39	C	761.971	415.581	1.83351	18.3438	2.27654	0.485894	2.56142	0.0646725	1.17398	0.0204302	3.42165	0.458331	-0.465086	403.979	4.59708	402.109	8.50485	392.333	51.0779	403.979	4.59708
73019PK1 42	C	120.328	47.9384	2.51005	16.0477	9.42286	0.561387	9.61442	0.0653676	1.90969	0.0201683	14.0824	0.198628	9.77888	408.187	7.55343	452.429	35.1033	684.933	201.218	408.187	7.55343
73019PK1 99	C	1764.53	2170.61	0.812921	18.1803	1.63276	0.496912	2.404	0.0655494	1.76446	0.0172491	3.64102	0.733967	0.0789856	409.286	6.99719	409.61	8.10307	412.385	36.5048	409.286	6.99719
73019PK1 51	C	172.244	54.8122	3.14243	17.4212	7.74619	0.520502	7.8977	0.0657944	1.53952	0.0186189	12.4311	0.194933	3.45929	410.768	6.12659	425.487	27.4532	506.964	170.474	410.768	6.12659
73019PK1 58	C	255.329	101.539	2.51459	17.2047	4.33254	0.528707	4.56314	0.0660009	1.43223	0.0189977	5.67852	0.313869	4.3935	412.017	5.7164	430.951	16.0248	534.405	94.8797	412.017	5.7164
73019PK1 46	C	218.703	82.1149	2.66338	18.3078	5.49467	0.500005	5.68621	0.0664201	1.46339	0.0188737	7.94567	0.257357	-0.691188	414.552	5.87555	411.706	19.2463	396.738	123.192	414.552	5.87555
73019PK1 61	C	2874.44	1283.05	2.24033	17.736	1.41723	0.516463	2.12145	0.0664634	1.57861	0.0215797	3.46575	0.744118	1.88578	414.813	6.34204	422.786	7.33622	467.462	31.4275	414.813	6.34204
73019PK1 48	C	113.422	42.4992	2.66881	15.7408	10.155	0.583179	10.3178	0.0666063	1.826	0.0198276	23.3626	0.176975	10.8949	415.677	7.35073	466.502	38.596	725.976	215.501	415.677	7.35073
73019PK1 80	C	923.491	121.7	7.58826	17.8032	1.8573	0.530075	2.59874	0.0684738	1.81765	0.0203092	7.70211	0.699436	1.13593	426.954	7.50911	431.86	9.14155	459.099	41.19	426.954	7.50911
73019PK1 84	C	679.723	233.791	2.90739	17.6574	2.70461	0.547732	3.15454	0.070175	1.62364	0.0247748	5.00301	0.514699	1.42036	437.21	6.86334	443.509	11.3356	477.267	59.7943	437.21	6.86334
73019PK1 40	C	1427.65	935.19	1.52659	17.5378	3.24148	0.561657	3.90447	0.0714717	2.17662	0.0231625	3.98673	0.557469	1.67648	445.016	9.35954	452.604	14.2588	492.304	71.5056	445.016	9.35954
73019PK1 56	C	673.072	114.077	5.90017	17.9851	2.84048	0.560486	3.29684	0.0731417	1.67358	0.0206211	7.16895	0.50763	-0.711114	455.056	7.35312	451.843	12.0237	436.473	63.2667	455.056	7.35312
73019PK1 27	C	175.509	82.6908	2.12247	16.9381	6.16826	0.637386	6.48643	0.0783347	2.00658	0.0242036	6.25113	0.30935	2.89822	486.175	9.39669	500.686	25.6395	568.538	134.316	486.175	9.39669
73019PK1 49	C	131.885	56.5906	2.33051	17.1532	6.56761	0.634428	6.75621	0.0789615	1.58517	0.021896	8.84362	0.234625	1.78998	489.921	7.47834	498.851	26.6302	540.992	143.653	489.921	7.47834
73119PK1 (IAM)
6/8 SE = 0.99; 6/7 SE = 1.4
RIMS
73119PK1-8	R	21368.5	7101.36	3.00907	20.4794	5.00501	0.102013	13.3034	0.0151521	12.326	0.00550873	21.3417	0.926531	1.71243	96.9439	11.8599	98.6329	12.5046	139.678	117.558	96.9439	11.8599
73119PK1-28	R	14106.4	2479.51	5.68917	20.5422	5.43439	0.102606	6.30212	0.0152869	3.19126	0.006532	42.073	0.506379	1.39045	97.8001	3.0975	99.1791	5.95485	132.469	127.801	97.8001	3.0975
73119PK1-25	R	16578.7	7068.54	2.34542	20.6301	2.4121	0.102188	4.71553	0.0152898	4.05192	0.00539477	9.84705	0.85927	0.987654	97.8185	3.93361	98.7943	4.43922	122.403	56.8454	97.8185	3.93361
73119PK1-27	R	16170.8	3016.35	5.36104	20.6378	1.835	0.103322	2.35248	0.0154653	1.47205	0.00573024	10.7452	0.625745	0.907501	98.9325	1.44522	99.8386	2.23691	121.509	43.2082	98.9325	1.44522
73119PK1-43	R	14787.3	5972.96	2.4757	20.9194	2.21201	0.102086	5.74383	0.0154886	5.30081	0.00532446	11.9258	0.92287	-0.385996	99.0808	5.21193	98.6998	5.40234	89.5298	52.4282	99.0808	5.21193
73119PK1-15	R	20266.3	5604.8	3.61588	20.7825	1.57769	0.103133	2.56535	0.0155451	2.02285	0.00539374	9.80352	0.788528	0.22579	99.4394	1.99608	99.6644	2.43527	105.027	37.2406	99.4394	1.99608
73119PK1-6	R	10983.8	2726.33	4.02879	20.695	2.85748	0.103572	4.05674	0.0155456	2.87958	0.00488986	11.8	0.709825	0.625636	99.4423	2.84155	100.068	3.8659	114.985	67.4541	99.4423	2.84155
73119PK1-26	R	9414.19	2056.25	4.57833	19.9972	4.95482	0.107587	7.37675	0.0156037	5.465	0.00623412	16.0426	0.74084	3.80173	99.8111	5.41266	103.756	7.27576	195.342	115.209	99.8111	5.41266
73119PK1-19	R	14802	6673.07	2.21817	20.6636	1.274	0.104463	3.16209	0.0156556	2.89408	0.00553812	7.98622	0.915245	0.740919	100.141	2.87576	100.888	3.0368	118.577	30.0071	100.141	2.87576
73119PK1-18	R	16073.2	3550.25	4.52733	20.6353	2.12227	0.104932	3.75356	0.0157042	3.09599	0.00541912	16.7547	0.824815	0.858087	100.449	3.08579	101.318	3.61946	121.798	50.0458	100.449	3.08579
73119PK1-24	R	16315.5	3582.5	4.55421	20.6743	1.77208	0.105096	3.916	0.0157585	3.4921	0.00588969	9.9375	0.891753	0.665978	100.794	3.49244	101.469	3.78145	117.349	41.7898	100.794	3.49244
73119PK1-2	R	17142.5	7899.44	2.17009	20.7908	0.907079	0.104537	3.25214	0.0157631	3.12308	0.00534652	10.0669	0.960315	0.131871	100.823	3.12428	100.956	3.12529	104.11	21.4405	100.823	3.12428
73119PK1-33	R	8725.62	1747.41	4.99346	20.6304	4.51817	0.105591	6.65181	0.0157992	4.88187	0.00485913	40.2444	0.733917	0.856029	101.052	4.89476	101.924	6.45065	122.385	106.424	101.052	4.89476
73119PK1-10	R	16963	5978.37	2.8374	20.9021	2.11705	0.104335	3.54681	0.0158168	2.84569	0.00508698	6.70865	0.802323	-0.390659	101.164	2.85634	100.77	3.4025	91.4443	50.1784	101.164	2.85634
73119PK1-7	R	9831.13	1927.93	5.09932	19.7269	12.2425	0.110578	12.8161	0.0158208	3.79097	0.0042553	45.2404	0.295798	4.98168	101.189	3.80609	106.494	12.9572	226.861	283.098	101.189	3.80609
73119PK1-16	R	14640.1	6509.9	2.24889	20.8083	1.86355	0.10487	3.37984	0.0158266	2.81966	0.00539474	12.0961	0.83426	0.0354644	101.226	2.83194	101.262	3.25737	102.124	44.0673	101.226	2.83194
73119PK1-30	R	8177.71	1905.86	4.29082	19.907	13.9553	0.10962	14.3459	0.0158268	3.3248	0.00433623	46.4302	0.231759	4.15699	101.227	3.33931	105.618	14.3907	205.802	324.075	101.227	3.33931
73119PK1-9	R	13275.9	2830.37	4.69051	20.8005	1.92349	0.104922	3.01134	0.0158285	2.31697	0.00514579	7.19147	0.769415	0.0707841	101.238	2.32733	101.31	2.90352	102.974	45.4763	101.238	2.32733
73119PK1-38	R	20456.8	6014.34	3.40133	20.6773	1.23341	0.105552	7.41789	0.0158291	7.31463	0.00502526	8.37298	0.986079	0.634138	101.242	7.34762	101.888	7.19115	117.047	29.1014	101.242	7.34762
73119PK1-37	R	10086.9	3704.31	2.72301	20.8722	9.16187	0.104822	14.0663	0.0158679	10.6734	0.0055005	24.9155	0.758793	-0.266875	101.488	10.7475	101.218	13.5512	94.8701	NA	101.488	10.7475
73119PK1-42	R	14657.7	3449	4.24985	21.0304	1.65262	0.104059	2.60956	0.0158719	2.01957	0.00565975	9.48813	0.773912	-0.991506	101.513	2.03407	100.517	2.49739	76.9227	39.2862	101.513	2.03407
73119PK1-13	R	10110	3053.87	3.31054	20.7924	2.99837	0.105482	3.56231	0.0159068	1.92348	0.00511173	9.24743	0.539954	0.0879696	101.735	1.94149	101.824	3.45135	103.939	70.8498	101.735	1.94149
73119PK1-20	R	10765.1	2634.57	4.08608	20.8331	2.84006	0.105303	3.80954	0.0159109	2.53903	0.00594963	11.5636	0.666493	-0.0992063	101.761	2.56345	101.66	3.68521	99.288	67.2257	101.761	2.56345
73119PK1-40	R	10275.4	1935.3	5.30947	21.1119	1.96951	0.103944	2.69262	0.0159157	1.8361	0.00516884	15.9839	0.681901	-1.37505	101.791	1.85431	100.41	2.57429	67.7776	46.8616	101.791	1.85431
73119PK1-39	R	9189.1	2360.6	3.8927	20.8049	3.17022	0.105674	3.86379	0.0159454	2.20875	0.00548041	11.5418	0.571653	0.0206817	101.98	2.23475	102.001	3.74961	102.487	74.9457	101.98	2.23475
73119PK1-12	R	13734.4	5164.71	2.65928	20.8169	1.46607	0.105723	3.27721	0.0159618	2.931	0.0050992	7.08396	0.894358	-0.0381558	102.084	2.96851	102.045	3.18168	101.126	34.6961	102.084	2.96851
73119PK1-11	R	12904.6	1546.41	8.34482	20.896	2.15977	0.105959	3.20339	0.0160583	2.36582	0.00509796	8.66594	0.738536	-0.4245	102.696	2.41036	102.262	3.1163	92.1728	51.1742	102.696	2.41036
73119PK1-17	R	4229.94	766.884	5.51575	20.7088	7.16004	0.106928	7.64301	0.01606	2.67384	0.00575953	18.9435	0.349842	0.431115	102.707	2.72445	103.151	7.49667	113.433	169.004	102.707	2.72445
73119PK1-3	R	18123.6	5155.77	3.51521	20.7825	1.4865	0.106886	7.18814	0.0161108	7.03276	0.0053453	16.7706	0.978384	0.0810317	103.029	7.1882	103.113	7.048	105.022	35.0835	103.029	7.1882
73119PK1-35	R	13484.2	1826.95	7.38073	20.9493	2.50748	0.106237	3.21877	0.0161416	2.01818	0.00468952	14.8851	0.627002	-0.689165	103.224	2.06666	102.518	3.1387	86.1476	59.4881	103.224	2.06666
73119PK1-45	R	15310	3727.54	4.10726	20.9627	1.4471	0.106252	2.95658	0.0161542	2.57822	0.00571684	8.5547	0.87203	-0.753793	103.304	2.64219	102.531	2.88339	84.5806	34.3298	103.304	2.64219
73119PK1-21	R	12005.1	3436.06	3.49385	20.5753	4.57483	0.109411	10.0912	0.016327	8.99466	0.00566414	15.0486	0.891334	0.973139	104.4	9.31483	105.426	10.1052	128.696	107.637	104.4	9.31483
73119PK1-14	R	6518.2	1613.18	4.04058	17.6955	25.7299	0.129579	28.855	0.0166301	13.0606	0.00452182	75.5938	0.45263	14.0611	106.323	13.7726	123.719	33.6131	472.546	571.381	106.323	13.7726
73119PK1-22	R	9623.48	1373.6	7.00605	20.6578	2.5068	0.111049	4.12274	0.0166378	3.27307	0.00621698	38.4511	0.793905	0.516792	106.372	3.45305	106.924	4.18405	119.275	59.0836	106.372	3.45305
73119PK1-31	R	15886.7	3799.35	4.18143	20.7268	1.065	0.11169	3.97029	0.0167898	3.82479	0.00565941	7.72402	0.963352	0.162432	107.335	4.07135	107.51	4.05025	111.403	25.0967	107.335	4.07135
73119PK1-44	R	6131.96	1655.62	3.70373	20.2102	8.25908	0.118576	14.2135	0.0173807	11.5676	0.00596021	57.0655	0.81385	2.37267	111.08	12.7393	113.78	15.2992	170.609	192.903	111.08	12.7393
MANTLE
73119PK1-34	M	13851.1	1888.21	7.3356	20.8498	1.80726	0.118344	5.22534	0.0178956	4.90285	0.00560635	6.88318	0.938284	-0.680712	114.342	5.55661	113.569	5.61455	97.3727	42.8033	114.342	5.55661
73119PK1-1	M	26318.2	10997.4	2.39314	20.8373	1.184	0.129443	10.4062	0.0195622	10.3387	0.00533095	13.7287	0.993506	-1.04507	124.888	12.7875	123.597	12.1099	98.8412	28.0507	124.888	12.7875
73119PK2
6/8 SE = 0.44; 6/7 SE = 0.46
RIMS
73119PK2 90	R	293.296	99.3374	2.95252	11.113	16.6153	0.191343	16.7742	0.0154287	2.30355	0.00496066	16.9888	0.137327	44.4799	98.7004	2.2563	177.774	27.3574	1425.19	317.846	98.7004	2.2563	Y
73119PK2 99	R	389.612	168.208	2.31625	12.8271	14.2041	0.169264	14.4142	0.0157536	2.45186	0.00508787	14.2928	0.170101	36.5392	100.763	2.45136	158.78	21.1878	1145.87	282.58	100.763	2.45136
73119PK2 62	R	286.433	125.378	2.28456	10.8793	21.9225	0.199699	22.0596	0.0157639	2.45482	0.00488777	15.8246	0.111281	45.4606	100.828	2.45588	184.871	37.2888	1465.67	417.659	100.828	2.45588
73119PK2 82	R	349.983	128	2.73425	12.633	13.7361	0.172371	13.9559	0.0158	2.46677	0.00480113	12.8565	0.176755	37.4159	101.057	2.47341	161.474	20.8354	1176.1	272.043	101.057	2.47341
73119PK2 50	R	273.207	93.3921	2.92538	11.4768	21.4677	0.189989	21.8069	0.015821	3.83166	0.00478893	21.1726	0.175708	42.707	101.19	3.84701	176.619	35.3552	1363.41	414.692	101.19	3.84701
73119PK2 65	R	486.48	166.882	2.91512	14.4901	13.3589	0.150619	13.4695	0.0158357	1.72299	0.00467634	15.0074	0.127917	28.9027	101.284	1.73147	142.458	17.9036	899.099	275.843	101.284	1.73147
73119PK2 71	R	327.771	135.192	2.42448	11.2741	19.6923	0.194237	19.8502	0.0158892	2.49874	0.00488851	17.6852	0.12588	43.6175	101.623	2.51938	180.238	32.7849	1397.65	378.397	101.623	2.51938
73119PK2 24	R	455.189	193.478	2.35267	13.2382	14.5006	0.165484	14.6344	0.0158954	1.97414	0.00438578	10.9331	0.134897	34.6189	101.663	1.99122	155.492	21.0994	1082.87	291.19	101.663	1.99122
73119PK2 92	R	179.604	42.6928	4.2069	8.97741	18.2151	0.24411	18.4961	0.015901	3.2118	0.00524207	30.6113	0.173647	54.1447	101.698	3.24071	221.78	36.854	1822.21	331.203	101.698	3.24071
73119PK2 51	R	259.636	95.1759	2.72796	9.37822	18.6292	0.233682	18.7817	0.0159013	2.38826	0.0045027	20.7881	0.127159	52.3058	101.7	2.4098	213.233	36.1269	1742.57	342.111	101.7	2.4098
73119PK2 95	R	202.15	61.3609	3.29444	9.0448	25.6648	0.242328	25.8084	0.0159034	2.71939	0.00419044	31.7931	0.105368	53.8349	101.713	2.74428	220.325	51.1271	1808.63	468.432	101.713	2.74428
73119PK2 83	R	304.524	97.4186	3.12593	10.6673	16.9836	0.205552	17.141	0.0159098	2.31768	0.00471929	21.847	0.135213	46.3926	101.754	2.33981	189.813	29.6778	1502.95	321.561	101.754	2.33981
73119PK2 87	R	306.811	132.019	2.32398	12.9129	16.5613	0.16985	16.718	0.015914	2.28324	0.00500233	16.6517	0.136574	36.1035	101.78	2.30564	159.289	24.6474	1132.6	330.261	101.78	2.30564
73119PK2 9	R	311.441	113.706	2.73901	11.8094	18.5708	0.185852	18.719	0.0159251	2.35075	0.00489047	16.6303	0.125581	41.1552	101.851	2.37544	173.084	29.7907	1308.17	361.25	101.851	2.37544
73119PK2 21	R	265.974	98.0123	2.71368	10.8103	22.9752	0.203126	23.0501	0.0159328	1.8563	0.0043344	19.1161	0.0805332	45.731	101.9	1.87669	187.768	39.5195	1477.74	437.105	101.9	1.87669
73119PK2 31	R	350.086	105.281	3.32525	12.3431	19.1289	0.177912	19.2195	0.0159337	1.86404	0.00573877	17.0217	0.0969867	38.708	101.905	1.88462	166.262	29.4778	1221.84	376.749	101.905	1.88462
73119PK2 33	R	485.881	191.313	2.53972	16.3868	11.7974	0.134026	11.9832	0.0159357	2.102	0.00487151	12.0008	0.175412	20.1951	101.918	2.12547	127.709	14.3806	640.13	253.92	101.918	2.12547
73119PK2 72	R	157.316	37.2282	4.22571	9.07586	23.7085	0.241997	23.8748	0.0159362	2.81277	0.00675141	36.4021	0.117814	53.6835	101.922	2.84428	220.054	47.2429	1802.4	432.783	101.922	2.84428
73119PK2 91	R	319.486	131.636	2.42703	12.4562	15.9161	0.176408	16.0818	0.0159438	2.30259	0.00501365	12.9808	0.14318	38.1871	101.969	2.32947	164.965	24.4875	1203.89	314.031	101.969	2.32947
73119PK2 63	R	223.618	57.8204	3.86746	12.2638	25.7109	0.179194	25.8355	0.0159454	2.53395	0.00534237	31.0708	0.0980803	39.0681	101.98	2.56378	167.367	39.8694	1234.53	506.348	101.98	2.56378
73119PK2 67	R	439.245	210.226	2.08939	13.264	17.064	0.165716	17.3516	0.0159487	3.14584	0.00580697	12.8686	0.1813	34.4865	102.001	3.18354	155.695	25.0474	1078.98	343.072	102.001	3.18354
73119PK2 34	R	451.939	178.937	2.52568	14.0052	15.1709	0.156946	15.3631	0.0159488	2.42231	0.0047241	13.7056	0.157671	31.0925	102.001	2.45134	148.026	21.1622	968.923	309.983	102.001	2.45134
73119PK2 59	R	668.183	279.327	2.39212	15.1506	9.64965	0.145161	9.79991	0.0159575	1.70949	0.00471867	9.07053	0.17444	25.8471	102.057	1.73091	137.63	12.6136	806.488	202.058	102.057	1.73091
73119PK2 20	R	555.157	243.339	2.28142	15.6122	13.643	0.140906	13.7253	0.0159618	1.50029	0.00488493	9.39479	0.109309	23.7332	102.084	1.51949	133.851	17.2124	743.346	288.828	102.084	1.51949
73119PK2 86	R	524.166	242.813	2.15872	16.2786	9.58715	0.135152	9.74827	0.0159634	1.76503	0.00486787	10.5724	0.181061	20.6828	102.094	1.7878	128.716	11.785	654.347	205.785	102.094	1.7878
73119PK2 40	R	805.27	474.072	1.69862	17.5712	7.71855	0.125245	7.87401	0.015968	1.55689	0.00505062	6.83268	0.197725	14.767	102.123	1.57741	119.816	8.89902	488.123	170.39	102.123	1.57741
73119PK2 88	R	459.144	127.947	3.58854	13.2676	13.3859	0.165931	13.521	0.0159738	1.90618	0.00482562	17.6345	0.140979	34.4631	102.16	1.932	155.882	19.5392	1078.41	268.936	102.16	1.932
73119PK2 1	R	597.778	183.768	3.2529	13.9139	12.3253	0.158315	12.4536	0.015983	1.78287	0.00513605	13.1481	0.143161	31.5017	102.218	1.80805	149.227	17.2835	982.304	251.212	102.218	1.80805
73119PK2 11	R	452.847	183.662	2.46565	13.7333	15.5775	0.160428	15.7301	0.0159861	2.18511	0.00458253	10.7681	0.138913	32.3277	102.238	2.21639	151.078	22.0821	1008.82	316.393	102.238	2.21639
73119PK2 78	R	355.989	113.551	3.13507	12.5862	14.937	0.175071	15.0544	0.0159881	1.87626	0.00433101	19.2755	0.124633	37.5798	102.251	1.90336	163.81	22.7751	1183.44	295.57	102.251	1.90336
73119PK2 57	R	562.906	194.724	2.89079	15.2772	10.7547	0.144276	10.9047	0.0159928	1.80224	0.00473502	11.2599	0.165272	25.2581	102.281	1.82879	136.845	13.9609	789.038	225.89	102.281	1.82879
73119PK2 58	R	173.321	44.5522	3.8903	7.65654	27.4461	0.288016	27.7852	0.0160006	4.32711	0.00603266	36.1947	0.155735	60.1823	102.33	4.39298	256.997	63.1071	2106.13	484.109	102.33	4.39298
73119PK2 61	R	221.772	62.9747	3.52161	10.4445	23.7993	0.211215	24.3161	0.0160067	4.98677	0.00486781	26.048	0.205081	47.3877	102.369	5.06457	194.572	43.0619	1542.73	449.031	102.369	5.06457
73119PK2 30	R	404.234	131.312	3.07842	13.7598	12.2618	0.160404	12.4307	0.0160146	2.04227	0.0049425	15.5168	0.164292	32.1984	102.419	2.07514	151.057	17.4479	1004.89	249.014	102.419	2.07514
73119PK2 54	R	322.083	139.987	2.3008	13.2107	18.2135	0.16721	18.6168	0.0160278	3.85407	0.00450951	13.763	0.207021	34.7094	102.503	3.91928	156.995	27.0815	1087.05	365.791	102.503	3.91928
73119PK2 66	R	311.463	105.88	2.94164	11.1029	17.2286	0.19906	17.509	0.0160365	3.12094	0.0050524	18.7564	0.178248	44.362	102.558	3.17544	184.33	29.5165	1426.92	329.545	102.558	3.17544
73119PK2 98	R	557.533	249.569	2.23399	13.8081	11.372	0.160113	11.4843	0.0160416	1.60192	0.0049546	9.66096	0.139489	31.9704	102.59	1.63041	150.802	16.0942	997.787	231.189	102.59	1.63041
73119PK2 41	R	499.478	210.311	2.37495	14.16	10.4349	0.156251	10.5724	0.0160537	1.69975	0.0049363	9.89889	0.160772	30.3558	102.667	1.73126	147.417	14.5072	946.472	213.799	102.667	1.73126
73119PK2 94	R	222.401	79.7888	2.78737	9.79595	22.7805	0.225912	22.8961	0.0160573	2.29789	0.00477226	25.2838	0.100361	50.3478	102.69	2.341	206.818	42.8485	1662.32	423.07	102.69	2.341
73119PK2 28	R	581.431	235.534	2.46856	15.1861	11.1471	0.145737	11.2895	0.0160585	1.78759	0.00505045	10.2399	0.158341	25.6576	102.697	1.82126	138.141	14.5813	801.578	233.671	102.697	1.82126
73119PK2 15	R	416.672	124.845	3.3375	12.4981	16.5001	0.177246	16.602	0.0160734	1.83662	0.00477527	17.3429	0.110626	37.9606	102.792	1.87292	165.688	25.3819	1197.31	325.942	102.792	1.87292
73119PK2 35	R	340.728	132.775	2.56621	13.0876	18.2308	0.169445	18.3029	0.0160908	1.62349	0.00474588	12.3998	0.0887013	35.2561	102.902	1.65735	158.937	26.9293	1105.76	365.089	102.902	1.65735
73119PK2 23	R	450.731	164.894	2.73347	13.404	13.4439	0.165544	13.8844	0.0161004	3.46978	0.00489375	11.4582	0.249904	33.8046	102.963	3.54422	155.545	20.0243	1057.88	270.901	102.963	3.54422
73119PK2 13	R	486.07	225.109	2.15926	13.6917	16.9602	0.162107	17.0566	0.0161045	1.81104	0.00497772	16.3116	0.106178	32.4863	102.989	1.85035	152.546	24.1601	1014.96	344.232	102.989	1.85035
73119PK2 32	R	567.437	233.932	2.42565	15.6875	9.69849	0.14158	9.82556	0.0161155	1.57509	0.00486198	9.00491	0.160305	23.3477	103.059	1.61036	134.45	12.3734	733.197	205.516	103.059	1.61036
73119PK2 42	R	266.799	84.3393	3.1634	11.5583	19.3181	0.192193	19.6255	0.0161183	3.46016	0.00472952	24.8626	0.176309	42.2536	103.077	3.53825	178.499	32.1276	1349.77	373.673	103.077	3.53825
73119PK2 75	R	607.142	235.974	2.57291	13.4452	14.1065	0.165249	14.1976	0.0161212	1.60549	0.00476863	10.4062	0.113081	33.6105	103.095	1.64201	155.288	20.4447	1051.7	284.623	103.095	1.64201
73119PK2 8	R	571.111	228.703	2.49718	16.0076	9.84145	0.138816	9.96332	0.0161233	1.55357	0.00534335	8.07802	0.155929	21.8808	103.108	1.58912	131.988	12.3317	690.248	210.015	103.108	1.58912
73119PK2 73	R	226.261	99.5406	2.27305	11.866	19.2761	0.187274	19.4596	0.0161238	2.66573	0.00486575	21.375	0.136988	40.8425	103.112	2.72681	174.301	31.1691	1298.88	375.485	103.112	2.72681
73119PK2 53	R	341.061	111.768	3.05151	14.962	11.2082	0.148595	11.4536	0.0161318	2.35825	0.0049593	17.7691	0.205896	26.664	103.162	2.41347	140.671	15.0459	832.646	233.835	103.162	2.41347
73119PK2 10	R	494.35	241.476	2.0472	15.6868	12.7735	0.141867	12.8709	0.0161474	1.5809	0.0049118	10.05	0.122827	23.3427	103.261	1.61946	134.705	16.2373	733.295	270.791	103.261	1.61946
73119PK2 44	R	500.959	210.581	2.37894	14.8275	15.5002	0.150101	15.6391	0.0161487	2.07983	0.00514006	10.8864	0.132989	27.2754	103.27	2.13072	142.001	20.7255	851.461	322.564	103.27	2.13072
73119PK2 18	R	527.848	220.819	2.39041	14.901	10.6958	0.149407	11.0382	0.0161538	2.72823	0.00500408	9.8235	0.247162	26.9375	103.302	2.79586	141.389	14.5692	841.197	222.751	103.302	2.79586
73119PK2 97	R	254.873	79.2555	3.21584	9.80688	23.945	0.227053	24.1077	0.0161564	2.79554	0.00453086	25.0722	0.115961	50.2709	103.319	2.86529	207.763	45.3024	1660.26	444.966	103.319	2.86529
73119PK2 45	R	603.87	206.002	2.93138	16.8531	11.2636	0.13214	11.3812	0.0161585	1.63202	0.00516741	15.295	0.143396	18.003	103.332	1.67295	126.019	13.4884	579.471	244.922	103.332	1.67295
73119PK2 27	R	387.063	188.082	2.05794	12.4711	17.8596	0.178639	18.0254	0.0161648	2.43942	0.00460608	11.9978	0.135333	38.0597	103.372	2.50156	166.889	27.742	1201.57	352.681	103.372	2.50156
73119PK2 3	R	347.762	101.044	3.4417	11.8331	16.9426	0.188367	17.1127	0.0161729	2.40703	0.00545649	14.6823	0.140657	40.98	103.423	2.46957	175.235	27.5442	1304.28	329.64	103.423	2.46957
73119PK2 19	R	289.646	97.3911	2.97405	11.4482	21.8887	0.194735	22.0145	0.0161759	2.35003	0.00455385	21.2259	0.10675	42.7425	103.442	2.41153	180.661	36.4382	1368.21	422.594	103.442	2.41153
73119PK2 69	R	372.073	124.204	2.99566	12.4199	16.6903	0.179506	16.8812	0.0161766	2.5318	0.00481182	21.1986	0.149977	38.2909	103.446	2.59815	167.635	26.0877	1209.66	329.086	103.446	2.59815
73119PK2 2	R	511.754	176.114	2.90581	13.8346	11.2539	0.161164	11.3976	0.0161779	1.80383	0.00534668	12.7293	0.158264	31.8127	103.455	1.85126	151.722	16.063	993.89	228.934	103.455	1.85126
73119PK2 84	R	196.92	57.071	3.45043	9.63592	20.3591	0.231412	20.5249	0.0161795	2.60358	0.00498954	21.0455	0.12685	51.0486	103.465	2.6723	211.363	39.1694	1692.75	376.388	103.465	2.6723
73119PK2 93	R	362.151	161.403	2.24377	11.5849	18.3598	0.192506	18.5016	0.0161817	2.28607	0.00441537	16.3636	0.123561	42.1145	103.479	2.34672	178.766	30.3288	1345.32	355.24	103.479	2.34672
73119PK2 89	R	360.094	114.515	3.14451	11.5033	11.164	0.193982	11.32	0.0161909	1.8728	0.00539169	18.7965	0.165442	42.4862	103.537	1.92356	180.021	18.6746	1358.97	215.339	103.537	1.92356
73119PK2 60	R	264.164	79.8788	3.30706	10.9906	19.067	0.20305	19.2248	0.0161925	2.45873	0.00479452	25.1008	0.127893	44.8347	103.547	2.52562	187.704	32.9496	1446.3	363.939	103.547	2.52562
73119PK2 6	R	356.501	115.142	3.09619	12.7874	14.3659	0.174578	14.4671	0.016198	1.70788	0.00513679	15.1121	0.118053	36.6022	103.582	1.75492	163.384	21.8341	1151.99	285.547	103.582	1.75492
73119PK2 96	R	164.869	51.9677	3.17253	7.55856	32.0319	0.295456	32.2285	0.0162039	3.55437	0.00537896	32.6373	0.110287	60.5776	103.62	3.65359	262.845	74.6681	2128.7	564.615	103.62	3.65359
73119PK2 74	R	172.963	64.318	2.68919	8.04317	21.1721	0.277654	21.4378	0.0162039	3.36426	0.00517544	30.0619	0.156931	58.3514	103.62	3.45816	248.795	47.3128	2019.25	376.377	103.62	3.45816
73119PK2 37	R	325.746	93.0795	3.49965	12.8574	16.5716	0.173867	16.744	0.0162203	2.39647	0.0047708	24.3508	0.143124	36.2758	103.724	2.46582	162.769	25.1831	1141.15	330.014	103.724	2.46582
73119PK2 29	R	316.37	87.1469	3.63031	10.5028	19.4	0.2129	19.5328	0.0162244	2.27392	0.0044711	26.4671	0.116415	47.062	103.75	2.3403	195.983	34.8166	1532.27	366.09	103.75	2.3403
73119PK2 52	R	440.401	184.722	2.38413	13.1221	14.629	0.17048	14.7918	0.0162316	2.18894	0.00496981	14.8839	0.147983	35.0607	103.796	2.25383	159.835	21.8765	1100.54	293.02	103.796	2.25383
73119PK2 80	R	350.82	142.339	2.46468	13.0132	16.076	0.171926	16.2637	0.0162335	2.46346	0.00465758	15.9985	0.15147	35.5587	103.808	2.53678	161.089	24.2276	1117.19	321.243	103.808	2.53678
73119PK2 70	R	382.575	153.024	2.50009	12.5023	16.3683	0.179089	16.4678	0.016246	1.80788	0.00470862	16.8144	0.109783	37.8953	103.887	1.8631	167.277	25.3987	1196.61	323.359	103.887	1.8631
73119PK2 39	R	372.771	144.649	2.57708	12.7706	13.6189	0.175367	13.764	0.0162498	1.99375	0.0047997	12.6307	0.144852	36.6652	103.911	2.05512	164.066	20.8528	1154.6	270.563	103.911	2.05512
73119PK2 7	R	441.667	147.216	3.00012	14.8561	15.4207	0.150787	15.5758	0.0162539	2.19306	0.00481664	16.7759	0.140799	27.1163	103.937	2.26112	142.607	20.7236	847.469	321.109	103.937	2.26112
73119PK2 22	R	243.048	77.3257	3.14317	10.0847	20.3816	0.222282	20.5104	0.016265	2.29483	0.00495817	20.436	0.111886	48.9677	104.007	2.36764	203.807	37.878	1608.36	380.899	104.007	2.36764
73119PK2 43	R	292.574	112.544	2.59965	11.4293	20.3852	0.196154	20.7757	0.0162669	4.00915	0.00485655	14.7763	0.192974	42.8047	104.019	4.13683	181.867	34.5969	1371.39	393.198	104.019	4.13683
73119PK2 38	R	421.697	175.285	2.40578	13.7102	13.2396	0.163972	13.4159	0.0163118	2.16785	0.00455622	12.5333	0.161587	32.3465	104.304	2.24296	154.174	19.1907	1012.22	268.664	104.304	2.24296
73119PK2 56	R	366.524	142.648	2.56943	12.8745	17.7889	0.174656	17.9574	0.0163155	2.45388	0.00501623	17.3581	0.13665	36.1721	104.328	2.53947	163.451	27.1126	1138.54	354.489	104.328	2.53947
73119PK2 85	R	321.09	97.8471	3.28155	9.58369	16.838	0.23473	16.9776	0.0163226	2.17219	0.00453582	16.939	0.127945	51.2496	104.373	2.24892	214.096	32.7748	1702.77	310.636	104.373	2.24892
73119PK2 5	R	468.916	210.944	2.22294	15.0796	13.1791	0.149216	13.3	0.0163265	1.7892	0.0050617	14.2713	0.134526	26.0742	104.397	1.85283	141.219	17.535	816.342	275.701	104.397	1.85283
73119PK2 25	R	256.299	96.7042	2.65034	12.6345	18.1739	0.178114	18.3616	0.0163284	2.61888	0.00377718	22.1767	0.142628	37.2677	104.409	2.71233	166.436	28.1889	1175.87	360.251	104.409	2.71233
73119PK2 26	R	181.821	58.0255	3.13346	8.85045	26.2955	0.254344	26.5021	0.0163333	3.30228	0.00439063	30.5901	0.124605	54.6105	104.441	3.42114	230.099	54.5782	1848.02	477.757	104.441	3.42114
73119PK2 81	R	341.902	135.385	2.52541	13.3398	14.2922	0.168795	14.4404	0.0163379	2.06357	0.00561132	14.598	0.142903	34.0355	104.47	2.13844	158.373	21.1761	1067.55	287.616	104.47	2.13844
73119PK2 14	R	256.334	93.6491	2.73717	11.362	19.9732	0.198902	20.1568	0.0163977	2.71448	0.00414406	20.8435	0.134669	43.0777	104.849	2.82309	184.197	33.9584	1382.74	384.61	104.849	2.82309
73119PK2 76	R	175.851	52.7751	3.33209	8.64917	25.1996	0.261305	25.4495	0.0163987	3.558	0.00455605	28.0907	0.139806	55.5165	104.856	3.70058	235.718	53.5473	1889.52	455.398	104.856	3.70058
73119PK2 100	R	305.386	93.6104	3.26231	11.2836	21.1653	0.200542	21.3295	0.0164188	2.6414	0.00506134	24.3266	0.123838	43.4312	104.983	2.75057	185.585	36.1814	1396.03	406.95	104.983	2.75057
73119PK2 49	R	279.573	91.9336	3.04104	10.8494	14.0295	0.208748	14.2835	0.0164329	2.6815	0.00464761	21.1127	0.187734	45.4173	105.072	2.79468	192.501	25.048	1470.9	266.624	105.072	2.79468
73119PK2 36	R	223.234	74.7873	2.98492	10.1688	24.9975	0.222944	25.1451	0.0164495	2.72054	0.00412289	26.129	0.108194	48.5323	105.178	2.83819	204.357	46.5531	1592.86	468.726	105.178	2.83819
73119PK2 68	R	187.282	81.209	2.30617	8.98492	20.2467	0.252326	20.5198	0.0164499	3.33696	0.00421299	23.5375	0.162621	53.962	105.18	3.48134	228.464	41.9866	1820.69	368.397	105.18	3.48134
73119PK2 16	R	324.146	120.215	2.69639	13.7898	14.7579	0.164875	15.0477	0.0164968	2.93881	0.0049633	14.4417	0.1953	31.9328	105.478	3.07457	154.961	21.6267	1000.47	300.044	105.478	3.07457
73119PK2 79	R	287.622	93.7391	3.06832	13.4637	14.8996	0.168935	15.0643	0.0165033	2.22155	0.00498996	21.778	0.147471	33.4243	105.519	2.32508	158.495	22.1069	1048.94	300.752	105.519	2.32508
73119PK2 77	R	337.754	111.264	3.03562	14.7722	15.5809	0.154032	15.7625	0.0165099	2.38585	0.00537699	19.6451	0.151363	27.4326	105.561	2.49801	145.466	21.363	859.198	323.825	105.561	2.49801
73119PK2 17	R	521.404	147.08	3.54503	15.5211	10.5513	0.146715	10.7555	0.0165228	2.08592	0.00483545	12.8824	0.19394	24.0023	105.643	2.18566	139.008	13.9729	755.712	222.794	105.643	2.18566
73119PK2 46	R	520.668	199.56	2.60907	14.4674	12.2936	0.158618	12.4429	0.0166507	1.92177	0.00495743	12.0721	0.154447	28.7904	106.453	2.02899	149.493	17.2972	902.331	253.677	106.453	2.02899	Y
73119PK2 12	R	439.169	164.704	2.66641	13.3383	10.359	0.172779	10.5195	0.0167217	1.83038	0.00541363	11.7397	0.173999	33.94	106.904	1.94061	161.828	15.7365	1067.77	208.363	106.904	1.94061	Y
73119PK2 55	R	139.466	53.1468	2.62417	5.92324	27.9037	0.39494	28.1168	0.0169738	3.45518	0.00479768	32.4426	0.122887	67.8962	108.502	3.71756	337.972	80.8725	2546.03	470.092	108.502	3.71756	Y
CORES
73119PK2 64	C	255.634	119.42	2.14062	11.0154	22.8977	0.242488	23.01	0.0193812	2.27027	0.00577536	15.7456	0.0986645	43.8692	123.744	2.78252	220.456	45.6055	1442.01	437.717	123.744	2.78252
73119PK2 48	C	328.481	141.989	2.31343	13.844	20.3841	0.193344	20.4619	0.0194214	1.78338	0.00548724	13.6707	0.0871559	30.912	123.998	2.19022	179.478	33.6652	992.543	415.502	123.998	2.19022
73119PK2 47	C	123.888	53.7814	2.30355	8.47126	25.2959	0.317289	25.6018	0.0195025	3.9457	0.00548395	26.7264	0.154118	55.5024	124.511	4.86569	279.815	62.6344	1926.84	455.133	124.511	4.86569
73119PK2 4	C	544.659	254.65	2.13885	16.9824	9.02641	0.159751	9.15689	0.0196847	1.54035	0.00635809	8.05439	0.168218	16.4945	125.663	1.91691	150.485	12.8074	562.807	196.719	125.663	1.91691
73119PK3
6/8 SE = 0.43; 6/7 SE = 0.45
RIMS
73119PK3 77	R	120.465	30.6794	3.92657	10.6111	18.7944	0.203775	19.4468	0.0156891	4.99503	0.00634471	31.6133	0.256856	46.71	100.353	4.97386	188.315	33.429	1512.93	355.523	100.353	4.97386
73119PK3 82	R	747.707	404.13	1.85017	17.3261	6.94082	0.125803	7.11703	0.0158153	1.5739	0.00500821	4.54592	0.221146	15.9284	101.154	1.57964	120.319	8.07529	518.997	152.396	101.154	1.57964	Y
73119PK3 72	R	476.875	187.83	2.53887	16.3315	10.5341	0.134827	10.6892	0.0159769	1.81472	0.00483736	11.4266	0.169771	20.4373	102.179	1.83965	128.426	12.8953	647.395	226.379	102.179	1.83965
73119PK3 89	R	740.017	359.572	2.05805	17.8632	6.86133	0.123478	7.06671	0.0160043	1.69131	0.00487678	6.9603	0.239336	13.4212	102.354	1.71745	118.22	7.8863	451.589	152.442	102.354	1.71745
73119PK3 30	R	541.872	215.954	2.5092	17.1824	7.35702	0.128637	7.6067	0.0160375	1.9329	0.00503203	7.32041	0.254105	16.5275	102.564	1.96678	122.872	8.80317	537.257	160.998	102.564	1.96678
73119PK3 100	R	1071.98	638.338	1.67932	20.3092	3.73063	0.108944	3.97803	0.016054	1.38098	0.00482007	4.53134	0.347152	2.21894	102.669	1.40661	104.999	3.96818	159.21	87.2671	102.669	1.40661
73119PK3 96	R	1070.27	570.098	1.87734	18.9271	8.00806	0.117206	8.1755	0.0160962	1.64612	0.005026	6.35235	0.201348	8.53015	102.936	1.681	112.536	8.70889	321.703	181.993	102.936	1.681
73119PK3 37	R	428.261	134.25	3.19003	16.9514	12.1488	0.130923	12.2985	0.0161031	1.91272	0.00500664	13.8026	0.155526	17.5674	102.98	1.95408	124.927	14.4568	566.827	264.767	102.98	1.95408
73119PK3 8	R	446.252	164.273	2.71652	16.2725	10.4167	0.136556	10.5596	0.0161233	1.73137	0.00453456	14.824	0.163962	20.6685	103.108	1.77099	129.971	12.8826	655.114	223.582	103.108	1.77099
73119PK3 71	R	280.376	38.748	7.2359	15.4823	14.0371	0.143585	14.2643	0.01613	2.53563	0.00562449	34.5187	0.177761	24.283	103.151	2.59472	136.232	18.1858	760.98	296.307	103.151	2.59472
73119PK3 86	R	657.427	260.6	2.52274	17.8738	5.26968	0.124379	5.5719	0.0161307	1.81013	0.00448182	7.63511	0.324868	13.34	103.155	1.85239	119.035	6.2585	450.276	117.09	103.155	1.85239
73119PK3 94	R	310.878	90.6056	3.43111	14.7672	15.0354	0.150803	15.1697	0.0161583	2.01394	0.00435648	19.5728	0.132761	27.5485	103.331	2.06443	142.621	20.185	859.9	312.433	103.331	2.06443
73119PK3 28	R	308.795	74.1269	4.16576	16.3989	13.4518	0.135995	13.6442	0.0161817	2.28339	0.00472719	23.2064	0.167353	20.0748	103.479	2.34397	129.47	16.5857	638.533	289.65	103.479	2.34397
73119PK3 65	R	466.254	38.609	12.0763	16.5757	8.26237	0.134606	8.43516	0.0161892	1.69856	0.00523857	28.9954	0.201367	19.264	103.526	1.74441	128.228	10.1612	615.385	178.454	103.526	1.74441
73119PK3 62	R	715.845	390.24	1.83437	18.6734	6.79506	0.119532	6.95888	0.0161954	1.50108	0.00482312	7.91758	0.215707	9.66543	103.566	1.54219	114.647	7.54428	352.258	153.574	103.566	1.54219
73119PK3 25	R	582.368	57.0648	10.2054	16.5028	8.99965	0.135255	9.1711	0.0161956	1.76504	0.00544103	21.546	0.192457	19.5959	103.567	1.8134	128.809	11.0947	624.894	194.09	103.567	1.8134
73119PK3 34	R	1360.21	882.701	1.54097	19.2728	4.43145	0.115836	4.69429	0.0161986	1.54875	0.00555788	4.2425	0.329922	6.92247	103.586	1.59147	111.29	4.94816	280.435	101.47	103.586	1.59147
73119PK3 99	R	388.818	116.006	3.35172	16.9232	10.2028	0.131929	10.3646	0.0161999	1.8239	0.00429733	19.4413	0.175975	17.671	103.595	1.87436	125.83	12.2661	570.422	222.172	103.595	1.87436
73119PK3 83	R	1056.46	650.488	1.6241	18.7929	5.93526	0.118832	6.15344	0.0162038	1.62404	0.00546481	4.99815	0.263924	9.11656	103.619	1.66936	114.013	6.6362	337.812	134.478	103.619	1.66936
73119PK3 39	R	746.843	319.336	2.33874	18.4048	6.72645	0.121418	6.92212	0.0162145	1.63421	0.00535225	6.92971	0.236085	10.8892	103.687	1.6809	116.357	7.61006	384.886	151.123	103.687	1.6809
73119PK3 45	R	621.731	240.464	2.58554	16.9191	8.71221	0.132137	8.84259	0.0162214	1.51287	0.00493792	9.47565	0.171089	17.6845	103.731	1.55676	126.016	10.4795	570.951	189.646	103.731	1.55676
73119PK3 46	R	685.012	272.664	2.5123	18.0366	8.02117	0.1241	8.18797	0.0162411	1.64428	0.00531098	5.34807	0.200817	12.5664	103.856	1.694	118.783	9.17861	430.1	178.828	103.856	1.694
73119PK3 33	R	813.674	374.304	2.17383	19.4009	5.88366	0.115381	6.03231	0.0162421	1.33088	0.00502185	5.51404	0.220626	6.32554	103.862	1.37121	110.876	6.33615	265.227	135.072	103.862	1.37121
73119PK3 80	R	594.807	252.44	2.35623	18.8932	5.39587	0.118485	5.66126	0.0162426	1.71304	0.00494798	6.6444	0.302591	8.64753	103.865	1.765	113.697	6.08944	325.758	122.516	103.865	1.765
73119PK3 7	R	675.457	336.809	2.00546	18.2954	7.32059	0.122394	7.51251	0.0162476	1.68724	0.00530352	8.27749	0.224591	11.3811	103.897	1.73895	117.241	8.31828	398.266	164.124	103.897	1.73895
73119PK3 81	R	518.992	180.188	2.88028	16.8722	8.92077	0.132738	9.13338	0.0162501	1.95921	0.00511162	11.2569	0.214511	17.8913	103.913	2.01955	126.555	10.8676	577.014	194.017	103.913	2.01955
73119PK3 97	R	500.89	197.209	2.5399	17.7021	8.91478	0.126592	9.19068	0.0162599	2.23501	0.00475226	11.8096	0.243182	14.092	103.975	2.30521	121.031	10.4863	471.708	197.368	103.975	2.30521
73119PK3 90	R	392.666	120.576	3.25659	16.5507	12.2189	0.135417	12.4104	0.0162621	2.17187	0.00529251	16.6426	0.175003	19.3591	103.989	2.24039	128.953	15.0294	618.638	263.944	103.989	2.24039
73119PK3 68	R	566.223	212.333	2.66667	18.6674	8.53482	0.12022	8.7215	0.0162836	1.79485	0.00464806	10.7696	0.205796	9.66971	104.125	1.85388	115.272	9.50383	353.005	192.868	104.125	1.85388
73119PK3 35	R	761.463	426.648	1.78476	18.1159	6.66374	0.123899	6.85775	0.0162861	1.61967	0.00545788	5.0426	0.236181	12.192	104.141	1.67319	118.601	7.67636	420.315	148.823	104.141	1.67319
73119PK3 61	R	651.965	240.103	2.71535	17.894	7.60156	0.125509	7.75969	0.0162957	1.55852	0.00462077	11.2042	0.200848	13.2045	104.202	1.61095	120.054	8.78625	447.762	168.981	104.202	1.61095
73119PK3 48	R	480.288	169.182	2.83889	16.4424	8.61718	0.13669	8.8289	0.0163075	1.92187	0.00493147	12.6136	0.21768	19.8431	104.277	1.98795	130.091	10.7804	632.843	185.617	104.277	1.98795
73119PK3 2	R	548.315	167.118	3.28102	17.7119	8.33521	0.126905	8.49948	0.0163091	1.66299	0.00491376	11.7646	0.195657	14.0343	104.287	1.72033	121.313	9.71888	470.494	184.556	104.287	1.72033
73119PK3 67	R	602.999	257.393	2.34271	18.3996	6.66098	0.122168	6.88452	0.01631	1.74007	0.00493808	8.7391	0.252752	10.888	104.293	1.80017	117.035	7.61035	385.515	149.663	104.293	1.80017
73119PK3 55	R	573.421	202.458	2.8323	17.1083	9.88301	0.131392	9.99191	0.0163103	1.47122	0.00506349	10.5094	0.147241	16.7954	104.295	1.52206	125.348	11.7825	546.694	216.038	104.295	1.52206
73119PK3 50	R	933.54	485.632	1.92232	18.6547	4.88645	0.120532	5.21605	0.0163146	1.82475	0.00528557	5.39601	0.349834	9.71991	104.322	1.8883	115.554	5.69705	354.513	110.382	104.322	1.8883
73119PK3 24	R	530.32	176.537	3.00401	17.1482	8.95515	0.131199	9.08673	0.0163244	1.54079	0.00526076	10.7812	0.169565	16.609	104.384	1.59539	125.174	10.7012	541.64	195.934	104.384	1.59539
73119PK3 43	R	711.944	287.325	2.47783	18.4218	7.80883	0.122162	8.05657	0.0163289	1.98255	0.0051767	8.11269	0.246078	10.7816	104.413	2.05335	117.03	8.90562	382.808	175.566	104.413	2.05335
73119PK3 84	R	803.193	370.467	2.16806	18.4208	5.03192	0.122185	5.27385	0.0163311	1.57901	0.00529847	5.96971	0.299404	10.7854	104.427	1.63563	117.051	5.83059	382.924	113.055	104.427	1.63563
73119PK3 31	R	597.973	231.167	2.58676	18.0348	8.43561	0.124895	8.60513	0.0163435	1.69962	0.00491325	11.6633	0.197512	12.5481	104.505	1.76187	119.5	9.70116	430.323	188.08	104.505	1.76187
73119PK3 56	R	832.033	410.465	2.02705	18.2031	6.22071	0.12377	6.45645	0.0163474	1.72873	0.00498006	9.10193	0.267753	11.7773	104.53	1.79247	118.484	7.22044	409.588	139.134	104.53	1.79247
73119PK3 63	R	533.114	186.296	2.86165	17.7112	8.54808	0.127273	8.68935	0.0163558	1.56048	0.00488558	12.5567	0.179586	14.0254	104.583	1.61883	121.644	9.96156	470.585	189.312	104.583	1.61883
73119PK3 17	R	504.892	171.164	2.94976	18.5282	5.44848	0.121865	5.81283	0.0163832	2.0256	0.00464121	10.8774	0.348471	10.2807	104.757	2.10482	116.761	6.41145	369.847	122.703	104.757	2.10482
73119PK3 12	R	432.092	142.873	3.02432	17.1546	8.43295	0.131631	8.66219	0.0163842	1.97964	0.00546656	11.9208	0.228538	16.5643	104.764	2.05718	125.562	10.2309	540.828	184.528	104.764	2.05718
73119PK3 85	R	342.958	56.7424	6.04413	17.1125	12.1451	0.132108	12.2851	0.0164032	1.84931	0.00418735	22.2523	0.150532	16.7521	104.884	1.92393	125.99	14.5565	546.16	265.57	104.884	1.92393
73119PK3 49	R	712.126	265.662	2.68057	17.6357	8.2751	0.12823	8.44829	0.0164086	1.70187	0.00564909	7.80717	0.201446	14.3567	104.918	1.77112	122.506	9.74976	479.98	182.945	104.918	1.77112
73119PK3 1	R	823.702	350.626	2.34923	18.5679	5.35938	0.121822	5.58291	0.0164126	1.56395	0.00483274	6.09665	0.280132	10.0916	104.943	1.62797	116.722	6.15593	365.026	120.829	104.943	1.62797
73119PK3 88	R	559.161	212.157	2.63559	18.3449	7.24705	0.123338	7.41918	0.0164172	1.58884	0.00504075	10.3421	0.214154	11.1103	104.973	1.65435	118.094	8.27131	392.199	162.629	104.973	1.65435
73119PK3 40	R	489.289	165.71	2.95269	18.5584	8.9993	0.121988	9.15973	0.0164265	1.70685	0.00524534	15.5798	0.186342	10.1313	105.032	1.77821	116.873	10.1122	366.177	202.929	105.032	1.77821
73119PK3 79	R	254.374	28.2961	8.98972	15.0166	15.3653	0.150779	15.5231	0.0164287	2.20774	0.00650959	35.2388	0.142223	26.3354	105.046	2.30034	142.6	20.6525	825.054	321.105	105.046	2.30034
73119PK3 92	R	666.654	260.136	2.56272	18.9059	5.00897	0.119775	5.33716	0.0164305	1.84268	0.00514621	9.06723	0.345254	8.54093	105.057	1.92018	114.868	5.79665	324.252	113.76	105.057	1.92018
73119PK3 47	R	889.073	491.14	1.81022	18.606	4.58065	0.121711	4.828	0.0164313	1.52553	0.00542967	5.50552	0.315974	9.91247	105.062	1.58976	116.622	5.31922	360.404	103.32	105.062	1.58976
73119PK3 64	R	379.132	106.931	3.54558	17.326	9.90518	0.130718	10.1788	0.0164332	2.34441	0.00458259	16.4617	0.230322	15.7672	105.074	2.44341	124.743	11.9486	519.001	217.534	105.074	2.44341
73119PK3 91	R	505.232	201.991	2.50126	19.0125	5.39822	0.119174	5.70675	0.0164403	1.85103	0.00504025	9.67563	0.324357	8.05069	105.119	1.93001	114.323	6.17028	311.425	122.881	105.119	1.93001
73119PK3 54	R	845.402	303.463	2.78585	18.1452	7.02554	0.124901	7.15092	0.0164442	1.33324	0.00540789	7.03689	0.186444	12.0172	105.144	1.39046	119.505	8.06204	416.713	157.015	105.144	1.39046
73119PK3 87	R	550.985	215.299	2.55916	17.1553	7.34639	0.132122	7.57678	0.016446	1.85423	0.00485334	10.3005	0.244726	16.5449	105.155	1.93401	126.002	8.97838	540.706	160.704	105.155	1.93401
73119PK3 16	R	525.211	167.477	3.13602	17.561	6.07264	0.129113	6.29973	0.0164515	1.67619	0.00485406	13.2061	0.266073	14.6875	105.19	1.74888	123.3	7.3145	489.393	134.015	105.19	1.74888
73119PK3 26	R	446.494	145.45	3.06975	17.4658	7.13529	0.129866	7.41451	0.0164578	2.01559	0.00597345	10.9463	0.271843	15.1212	105.23	2.10379	123.977	8.65333	501.36	157.134	105.23	2.10379
73119PK3 51	R	595.557	194.431	3.06307	17.5795	9.03669	0.129147	9.17613	0.0164733	1.59365	0.00478918	10.7488	0.173674	14.5971	105.328	1.66493	123.331	10.6568	487.053	199.567	105.328	1.66493
73119PK3 57	R	562.567	208.613	2.6967	17.4789	7.21848	0.129954	7.84111	0.0164813	3.0621	0.00517624	9.1533	0.390519	15.0555	105.379	3.20059	124.057	9.15673	499.733	159.056	105.379	3.20059
73119PK3 44	R	943.281	489.693	1.92627	19.5466	5.6028	0.116287	5.79782	0.0164927	1.49112	0.00518082	5.38224	0.257185	5.59442	105.452	1.55962	111.701	6.13272	248.04	129.021	105.452	1.55962
73119PK3 32	R	534.647	209.876	2.54744	17.5508	9.924	0.129665	10.1597	0.0165122	2.17574	0.0051776	13.0998	0.214154	14.7185	105.575	2.27834	123.797	11.841	490.665	219.009	105.575	2.27834
73119PK3 22	R	489.114	47.7961	10.2333	17.7544	7.73969	0.128293	7.92073	0.0165272	1.6838	0.00592254	24.545	0.212581	13.7829	105.67	1.76477	122.563	9.14492	465.138	171.519	105.67	1.76477
73119PK3 41	R	468.544	146.649	3.195	18.7743	7.70915	0.121325	8.01158	0.0165274	2.18045	0.00473055	13.1235	0.272162	9.11768	105.671	2.28533	116.273	8.80178	340.088	174.583	105.671	2.28533
73119PK3 27	R	723.444	394.034	1.836	18.6744	6.16464	0.122033	6.39266	0.0165353	1.69213	0.00506065	8.15863	0.2647	9.57264	105.721	1.77436	116.913	7.05966	352.12	139.279	105.721	1.77436
73119PK3 59	R	833.97	321.724	2.59219	19.1347	5.3286	0.119169	5.68559	0.0165451	1.98291	0.00487189	8.1406	0.34876	7.46511	105.784	2.08048	114.318	6.14713	296.87	121.584	105.784	2.08048
73119PK3 58	R	722.303	225.046	3.20958	17.6797	6.66145	0.128985	6.85379	0.0165463	1.61232	0.00554912	10.2759	0.235245	14.1199	105.792	1.69178	123.185	7.95087	474.504	147.416	105.792	1.69178
73119PK3 70	R	516.711	202.766	2.54831	17.2664	8.11445	0.132147	8.27062	0.0165557	1.59965	0.00475369	10.8735	0.193413	16.0079	105.851	1.67942	126.025	9.80224	526.599	177.946	105.851	1.67942
73119PK3 69	R	491.06	179.359	2.73787	18.1431	9.31065	0.125853	9.43428	0.0165677	1.52228	0.00450439	13.3465	0.161357	11.9948	105.927	1.59934	120.365	10.7084	416.972	208.06	105.927	1.59934
73119PK3 23	R	392.211	109.679	3.57599	15.4319	9.35181	0.148295	9.56745	0.0166048	2.01981	0.00466734	18.4225	0.211112	24.3886	106.162	2.12671	140.405	12.546	767.857	197.084	106.162	2.12671
73119PK3 20	R	523.635	173.185	3.02356	17.5161	8.35155	0.130686	8.68921	0.0166094	2.39875	0.00512204	10.2486	0.276061	14.8517	106.192	2.52641	124.714	10.1977	495.041	184.154	106.192	2.52641
73119PK3 73	R	510.983	227.689	2.24422	16.1226	7.90272	0.142102	8.14499	0.0166236	1.97177	0.00534938	7.89516	0.242084	21.223	106.282	2.07845	134.915	10.2901	674.934	169.043	106.282	2.07845
73119PK3 74	R	515.939	210.295	2.4534	17.4349	9.60219	0.131505	9.86397	0.0166361	2.2574	0.00481014	12.4277	0.228853	15.2161	106.361	2.38128	125.449	11.6405	505.263	211.37	106.361	2.38128
73119PK3 38	R	691.257	330.145	2.0938	18.5741	5.8491	0.123676	6.10701	0.0166679	1.756	0.0053325	6.19485	0.287539	9.99731	106.563	1.85586	118.399	6.82503	364.277	131.906	106.563	1.85586
73119PK3 11	R	330.507	68.1073	4.85275	17.272	14.5158	0.133044	14.75	0.0166735	2.61775	0.0056196	24.0201	0.177475	15.9517	106.598	2.76753	126.83	17.5866	525.851	318.631	106.598	2.76753
73119PK3 19	R	781.73	387.37	2.01804	18.9668	5.42212	0.12127	5.65629	0.0166892	1.61064	0.00497577	6.00503	0.284753	8.19544	106.697	1.70437	116.222	6.21162	316.898	123.283	106.697	1.70437			PeakFit Output
73119PK3 6	R	356.649	55.686	6.40463	15.5073	11.654	0.148373	11.8592	0.0166947	2.19663	0.00485966	25.343	0.185226	24.02	106.733	2.32522	140.475	15.5584	757.585	246.046	106.733	2.32522			[1] "Peak 1: 104.28 ± 0.17 | 0.33 (80.01%)"
73119PK3 75	R	327.103	84.9135	3.8522	16.9722	10.9516	0.135568	11.2205	0.0166949	2.44144	0.00485096	20.9974	0.217589	17.3178	106.734	2.58439	129.089	13.6016	564.12	238.749	106.734	2.58439			[2] "Peak 2: 106.83 ± 0.53 | 1.03 (18.83%)"
73119PK3 18	R	592.342	55.0229	10.7654	18.1117	8.20251	0.127378	8.34975	0.0167395	1.56117	0.00550776	29.7483	0.186972	12.0934	107.016	1.65692	121.739	9.57923	420.828	183.224	107.016	1.65692			[3] "Peak 3: 112.53 ± 0.89 | 1.75 (1.16%)"
73119PK3 52	R	963.26	516.998	1.86318	19.2986	4.10339	0.12021	4.3797	0.0168328	1.531	0.00591322	8.13724	0.349567	6.64105	107.608	1.6338	115.262	4.77217	277.37	93.9893	107.608	1.6338
73119PK3 21	R	383.405	140.173	2.73523	15.9293	10.1253	0.145643	10.5541	0.0168335	2.97778	0.00492732	15.8897	0.282145	22.0523	107.612	3.17786	138.057	13.6237	700.672	215.702	107.612	3.17786
73119PK3 66	R	900.99	475.188	1.89607	19.3948	3.97893	0.119789	4.30307	0.0168574	1.63846	0.00506786	6.39872	0.380766	6.1952	107.764	1.75099	114.881	4.67402	265.958	91.2927	107.764	1.75099
73119PK3 76	R	394.529	150.085	2.62871	16.0285	8.96289	0.145353	9.19585	0.0169047	2.05678	0.005288	9.25772	0.223663	21.5799	108.064	2.2041	137.801	11.8498	687.451	191.304	108.064	2.2041
73119PK3 78	R	486.907	218.419	2.22923	17.633	9.58347	0.132183	9.74499	0.0169117	1.76691	0.00506765	8.93804	0.181315	14.2384	108.109	1.89425	126.057	11.5524	480.321	211.861	108.109	1.89425
73119PK3 3	R	541.559	170.674	3.17306	17.8199	6.94631	0.131067	7.11914	0.0169467	1.55917	0.00553581	11.9567	0.219011	13.3746	108.33	1.67494	125.056	8.37653	457.004	154.156	108.33	1.67494	Y
73119PK3 53	R	677.961	546.175	1.24129	18.1355	6.33526	0.133799	6.52382	0.0176064	1.55717	0.00527369	6.46571	0.23869	11.7605	112.51	1.73678	127.506	7.8172	417.904	141.572	112.51	1.73678	Y
MANTLES
73119PK3 15	M	630.364	82.56	7.63522	18.0548	6.64187	0.123338	6.89552	0.0161576	1.85302	0.00531844	18.9385	0.268728	12.5049	103.326	1.89939	118.094	7.68751	427.854	148.174	103.326	1.89939
73119PK3 5	M	584.016	214.691	2.72027	18.1317	5.9103	0.125157	6.11133	0.0164657	1.55457	0.00508988	11.0632	0.254376	12.0734	105.28	1.62337	119.737	6.90255	418.376	132.026	105.28	1.62337
73119PK3 36	M	493.536	148.185	3.33053	17.7156	7.872	0.128189	8.15008	0.0164776	2.11082	0.00561427	11.5949	0.258993	13.9733	105.356	2.2058	122.469	9.40293	469.984	174.326	105.356	2.2058
73119PK3 29	M	347.154	115.055	3.01727	17.1322	12.846	0.135489	13.0115	0.0168425	2.06849	0.00539311	15.2354	0.158974	16.547	107.669	2.20863	129.018	15.7647	543.654	281.085	107.669	2.20863
73119PK3 93	M	280.639	43.118	6.50863	14.9787	12.5934	0.155301	12.8155	0.0168785	2.37515	0.00522612	30.7028	0.185334	26.3903	107.898	2.54141	146.581	17.4926	830.321	262.836	107.898	2.54141
73119PK3 98	M	901.916	421.258	2.14101	19.3847	4.57828	0.120823	4.92629	0.016994	1.81869	0.00540249	7.53007	0.36918	6.20626	108.63	1.95909	115.818	5.39218	267.162	105.071	108.63	1.95909
73119PK3 95	M	1754.52	1042.24	1.68342	20.16	2.47949	0.118476	2.77723	0.0173303	1.25105	0.00553146	4.95962	0.450467	2.57515	110.761	1.37385	113.689	2.98707	176.422	57.8552	110.761	1.37385
73119PK3 42	M	1288.66	76.4763	16.8505	19.2216	3.85513	0.125526	4.48656	0.0175069	2.29503	0.00537093	21.326	0.511535	6.82034	111.88	2.54553	120.069	5.08067	286.497	88.1848	111.88	2.54553
73119PK3 13	M	820.03	60.4358	13.5686	19.146	4.94871	0.127206	5.32089	0.0176715	1.95501	0.00494438	26.831	0.367422	7.12342	112.923	2.18843	121.584	6.09704	295.5	112.931	112.923	2.18843
73119PK3 14	M	507.922	113.425	4.47806	17.7818	9.1352	0.146153	9.36968	0.018857	2.08301	0.00518565	17.6765	0.222313	13.0544	120.428	2.48524	138.51	12.1318	461.724	202.59	120.428	2.48524
73119PK3 10	M	6811.08	158.059	43.0921	20.6822	1.3862	0.130997	4.14111	0.0196582	3.90221	0.00450875	13.3107	0.94231	-0.402106	125.496	4.84974	124.993	4.8702	116.482	32.7079	125.496	4.84974
CORES
73119PK3 60	C	397.077	118.873	3.34034	16.1759	11.2391	0.139065	11.4458	0.016322	2.16517	0.00495432	13.143	0.189167	21.0586	104.369	2.24157	132.211	14.189	667.881	240.757	104.369	2.24157
73119PK3 9	C	488.302	167.639	2.91282	16.6273	8.021	0.137664	8.28724	0.0166085	2.08372	0.0053395	9.75263	0.251437	18.9182	106.186	2.19449	130.961	10.1824	608.672	173.473	106.186	2.19449
73119PK3 4	C	574.966	215.283	2.67074	17.0276	8.8341	0.141453	8.98336	0.0174765	1.63075	0.00553915	10.4168	0.18153	16.8606	111.687	1.80565	134.337	11.3039	557.056	192.74	111.687	1.80565
73119PK4
6/8 SE = 0.44; 6/7 SE = 0.45
RIMS
73119PK4 16	R	459.854	142.437	3.22847	15.8919	12.3085	0.135158	12.4413	0.0155849	1.81321	0.00510301	16.6436	0.145741	22.5524	99.6921	1.79372	128.722	15.0414	705.693	262.051	99.6921	1.79372
73119PK4 72	R	1247.47	832.913	1.49771	18.2284	5.30376	0.118072	5.5263	0.0156165	1.55245	0.00501085	6.11328	0.280921	11.8511	99.8926	1.53883	113.323	5.92574	406.472	118.707	99.8926	1.53883
73119PK4 65	R	672.112	230.525	2.91557	16.7539	8.75112	0.12912	8.95522	0.0156962	1.901	0.00502963	11.9481	0.212278	18.578	100.398	1.89379	123.306	10.3983	592.266	189.831	100.398	1.89379
73119PK4 22	R	721.395	267.198	2.69986	18.9181	7.12615	0.114754	7.34153	0.0157518	1.76522	0.00552523	9.76288	0.240443	8.66064	100.751	1.76466	110.305	7.67372	322.791	161.909	100.751	1.76466
73119PK4 77	R	735.318	270.795	2.7154	18.2937	6.08723	0.118748	6.28183	0.0157622	1.55145	0.00541608	11.0373	0.246975	11.5146	100.817	1.55197	113.937	6.77038	398.466	136.449	100.817	1.55197
73119PK4 61	R	1217.74	773.392	1.57455	18.7615	5.98132	0.116118	6.12596	0.0158071	1.32331	0.00529045	6.22535	0.216017	9.36293	101.102	1.32746	111.546	6.47132	341.627	135.432	101.102	1.32746
73119PK4 76	R	784.527	392.758	1.99748	18.2055	8.44578	0.119686	8.6014	0.01581	1.62876	0.00518771	9.57083	0.18936	11.9058	101.121	1.63417	114.787	9.33572	409.29	189.005	101.121	1.63417
73119PK4 83	R	1611.55	421.492	3.82344	18.8088	4.15153	0.116347	4.41372	0.0158782	1.4986	0.00538747	6.69924	0.339531	9.12804	101.554	1.50995	111.755	4.67079	335.939	94.0675	101.554	1.50995
73119PK4 60	R	354.185	97.3436	3.6385	13.8308	16.5809	0.158228	17.0174	0.0158788	3.82967	0.00511636	23.2093	0.225044	31.9099	101.557	3.85882	149.151	23.6065	994.488	337.566	101.557	3.85882
73119PK4 92	R	630.619	213.462	2.95424	18.0312	9.29635	0.12148	9.49692	0.0158935	1.94149	0.00481585	9.46715	0.204433	12.6814	101.65	1.95805	116.413	10.4455	430.764	207.233	101.65	1.95805
73119PK4 70	R	1317.05	742.396	1.77406	18.4654	4.94465	0.118765	5.12373	0.0159124	1.34276	0.00539695	5.5974	0.262067	10.6899	101.771	1.35581	113.952	5.5229	377.488	111.2	101.771	1.35581
73119PK4 86	R	525.957	219.32	2.39813	16.2737	14.0959	0.134929	14.2464	0.0159323	2.06528	0.00524832	15.0396	0.144969	20.7136	101.897	2.08791	128.517	17.1982	654.966	302.748	101.897	2.08791
73119PK4 20	R	483.652	197.357	2.45065	16.9209	9.9777	0.129797	10.2291	0.0159358	2.25369	0.00543844	10.9977	0.220322	17.7508	101.919	2.27888	123.915	11.9326	570.745	217.172	101.919	2.27888
73119PK4 85	R	687.585	271.984	2.52803	16.7826	9.68791	0.131015	9.86537	0.015954	1.86276	0.00574635	9.50824	0.188818	18.3788	102.034	1.8857	125.01	11.6038	588.542	210.266	102.034	1.8857
73119PK4 55	R	904.367	343.697	2.63129	18.632	7.36455	0.118047	7.49491	0.0159589	1.3918	0.00539785	8.64924	0.185699	9.91586	102.066	1.40936	113.3	8.03516	357.252	166.305	102.066	1.40936
73119PK4 38	R	759.013	322.454	2.35387	17.0212	7.78781	0.129261	8.04684	0.0159641	2.02523	0.00565074	8.62558	0.25168	17.2846	102.098	2.05143	123.433	9.35255	557.853	169.914	102.098	2.05143
73119PK4 27	R	472.253	148.167	3.18731	15.989	12.0072	0.137728	12.1665	0.0159784	1.96259	0.00545025	18.7808	0.161311	22.0041	102.189	1.98974	131.018	14.955	692.704	256.207	102.189	1.98974
73119PK4 29	R	932.121	336.757	2.76794	17.0534	8.3303	0.129147	8.45278	0.0159803	1.43371	0.00542481	9.24615	0.169614	17.1328	102.201	1.45371	123.331	9.81674	553.734	181.85	102.201	1.45371
73119PK4 80	R	386.33	126.411	3.05614	14.4044	13.1143	0.153189	13.2781	0.0160107	2.07906	0.00558224	16.7752	0.156578	29.2485	102.394	2.11201	144.723	17.9103	911.319	270.307	102.394	2.11201
73119PK4 74	R	806.297	320.728	2.51396	17.9115	7.61898	0.123325	7.77061	0.0160277	1.52758	0.00492301	8.84256	0.196584	13.1942	102.502	1.55341	118.082	8.66229	445.591	169.455	102.502	1.55341
73119PK4 8	R	1309.93	606.123	2.16116	18.558	6.28362	0.119088	6.47345	0.0160356	1.55615	0.00595982	5.93196	0.240389	10.2347	102.552	1.58324	114.245	6.99473	366.234	141.66	102.552	1.58324
73119PK4 4	R	1051.1	410.706	2.55925	18.3543	4.4981	0.120451	4.72769	0.0160412	1.4554	0.00556727	8.33106	0.307846	11.165	102.588	1.48124	115.481	5.16058	391.053	100.909	102.588	1.48124
73119PK4 95	R	591.072	204.215	2.89437	16.5675	8.86574	0.133472	9.05014	0.0160447	1.81762	0.00519778	12.4536	0.200839	19.3396	102.61	1.8503	127.212	10.821	616.456	191.512	102.61	1.8503
73119PK4 33	R	925.873	495.025	1.87036	19.1177	7.33564	0.115702	7.51515	0.0160497	1.63277	0.00521344	6.11976	0.217263	7.67047	102.641	1.66262	111.168	7.91341	298.855	167.383	102.641	1.66262
73119PK4 100	R	241.405	55.0045	4.38882	13.0321	22.0935	0.169779	22.3306	0.0160541	3.2452	0.00579096	38.2024	0.145326	35.5201	102.669	3.30544	159.227	32.9115	1114.26	442.348	102.669	3.30544
73119PK4 26	R	504.035	150.3	3.35353	16.8047	9.70958	0.131664	9.91873	0.0160541	2.02617	0.00581529	15.7299	0.204277	18.2517	102.669	2.06378	125.592	11.7177	585.725	210.795	102.669	2.06378
73119PK4 68	R	632.481	238.089	2.65649	17.581	9.05191	0.125918	9.22378	0.0160627	1.77228	0.00546003	11.3478	0.192142	14.6974	102.724	1.80613	120.423	10.4743	486.863	199.913	102.724	1.80613
73119PK4 31	R	818.721	463.546	1.76621	17.9819	6.83717	0.123118	7.04198	0.0160637	1.686	0.00513863	6.91393	0.239422	12.8631	102.73	1.71831	117.895	7.83834	436.875	152.258	102.73	1.71831
73119PK4 67	R	573.699	222.105	2.58301	15.9238	14.5799	0.139032	14.7631	0.0160637	2.31876	0.00518214	11.5495	0.157064	22.2803	102.731	2.36319	132.181	18.2977	701.459	310.775	102.731	2.36319
73119PK4 49	R	1115.17	581.207	1.91872	17.4054	5.95901	0.127208	6.11713	0.0160652	1.38183	0.0054636	6.64063	0.225896	15.4999	102.74	1.40844	121.585	7.00953	508.982	131.048	102.74	1.40844
73119PK4 32	R	765.167	257.768	2.96843	17.4278	7.01326	0.1271	7.23715	0.0160722	1.78618	0.00519851	8.88848	0.246808	15.3959	102.784	1.82136	121.488	8.28671	506.14	154.319	102.784	1.82136
73119PK4 11	R	576.191	160.411	3.59196	16.7186	9.31004	0.132496	9.49835	0.0160728	1.88196	0.00494942	12.6846	0.198136	18.6406	102.788	1.91909	126.338	11.2836	596.859	201.756	102.788	1.91909
73119PK4 43	R	997.738	572.915	1.74151	18.673	5.38106	0.118646	5.56797	0.0160752	1.43058	0.00455817	6.78613	0.25693	9.6982	102.803	1.45902	113.844	5.99639	352.331	121.565	102.803	1.45902
73119PK4 78	R	359.115	95.8546	3.74646	13.3566	16.8676	0.165983	17.0359	0.0160859	2.38853	0.00545523	23.8097	0.140206	34.0256	102.871	2.43761	155.926	24.6255	1065.01	339.781	102.871	2.43761
73119PK4 94	R	740.236	282.323	2.62195	17.7456	8.0694	0.124934	8.52059	0.0160864	2.73593	0.00488505	10.2574	0.321096	13.9378	102.874	2.79223	119.535	9.60849	466.264	178.823	102.874	2.79223
73119PK4 39	R	734.35	229.747	3.19634	17.7291	9.36599	0.125051	9.49289	0.0160865	1.54701	0.00564802	15.2535	0.162965	14.0138	102.875	1.57885	119.641	10.7139	468.309	207.499	102.875	1.57885
73119PK4 51	R	1124.82	679.783	1.65468	17.9568	5.36683	0.123473	5.65899	0.0160875	1.79482	0.00585972	5.61161	0.317162	12.9714	102.882	1.83188	118.216	6.31509	439.974	119.476	102.882	1.83188											Youngest Age Mode								Overlapping Antecryst Age Mode
73119PK4 25	R	503.054	138.213	3.63972	16.6307	10.4014	0.133622	10.5637	0.0161241	1.84504	0.00520971	14.4848	0.174657	19.0294	103.114	1.88735	127.347	12.6434	608.225	225.002	103.114	1.88735
73119PK4 98	R	489.373	139.233	3.51478	15.8444	12.9659	0.140672	13.2212	0.0161722	2.58555	0.00497617	17.3698	0.195561	22.615	103.419	2.65261	133.642	16.556	712.054	275.787	103.419	2.65261
73119PK4 69	R	719.6	354.828	2.02803	16.0631	10.786	0.138809	10.9181	0.0161784	1.69307	0.00482353	8.92595	0.155071	21.6126	103.458	1.73764	131.983	13.5129	682.843	230.445	103.458	1.73764
73119PK4 40	R	535.52	152.703	3.50693	16.629	11.6279	0.134104	11.833	0.0161806	2.19335	0.00532451	13.675	0.18536	19.0224	103.472	2.25139	127.779	14.2075	608.448	251.588	103.472	2.25139
73119PK4 59	R	686.436	303.97	2.25824	16.1971	8.76499	0.137878	8.97621	0.0162039	1.93579	0.00567949	6.96346	0.215658	20.9926	103.62	1.98982	131.152	11.044	665.118	187.779	103.62	1.98982
73119PK4 14	R	873.214	299.639	2.91422	17.9693	7.43404	0.124342	7.63595	0.0162119	1.74436	0.00554193	9.63502	0.228441	12.8821	103.671	1.79393	119	8.5746	438.433	165.505	103.671	1.79393
73119PK4 30	R	415.168	107.253	3.87091	15.7945	9.11993	0.141552	9.38183	0.0162223	2.20124	0.00491443	18.9701	0.234628	22.8299	103.736	2.26521	134.425	11.8125	718.743	193.745	103.736	2.26521
73119PK4 89	R	782.494	441.391	1.77279	16.7887	7.88312	0.133366	8.08263	0.0162462	1.78476	0.00473989	6.45024	0.220814	18.2743	103.888	1.83929	127.118	9.65743	587.76	171.053	103.888	1.83929
73119PK4 71	R	318.321	79.0613	4.02626	12.1199	18.4546	0.184755	18.6568	0.0162475	2.73948	0.00449361	26.9724	0.146835	39.6459	103.896	2.8234	172.144	29.5438	1257.64	361.554	103.896	2.8234
73119PK4 17	R	945.567	517.683	1.82654	17.3354	6.66846	0.129171	6.81391	0.0162475	1.40036	0.00565767	5.95573	0.205515	15.7728	103.896	1.44326	123.352	7.91467	517.814	146.443	103.896	1.44326
73119PK4 53	R	499.372	162.819	3.06703	16.3804	9.26221	0.136717	9.50415	0.0162494	2.13082	0.00529813	14.2052	0.224198	20.1417	103.908	2.19635	130.116	11.607	640.961	199.256	103.908	2.19635
73119PK4 10	R	441.853	133.62	3.30678	16.0221	11.7583	0.139833	11.953	0.0162561	2.14864	0.00546475	18.4412	0.179757	21.7798	103.951	2.21562	132.895	14.8896	688.301	251.112	103.951	2.21562
73119PK4 82	R	664.701	233.748	2.84366	18.0729	7.86216	0.123971	8.05188	0.0162569	1.73759	0.00565428	10.6214	0.215799	12.3964	103.956	1.79184	118.666	9.01771	425.62	175.432	103.956	1.79184
73119PK4 58	R	524.83	182.164	2.88109	15.0667	12.0207	0.148732	12.1706	0.0162596	1.90421	0.00526561	12.7256	0.15646	26.1513	103.973	1.96398	140.792	16.0006	818.141	251.354	103.973	1.96398
73119PK4 23	R	880.431	438.144	2.00946	17.689	7.74701	0.126705	7.89265	0.0162624	1.50922	0.0059593	6.85586	0.191218	14.1512	103.991	1.55686	121.133	9.01238	473.334	171.474	103.991	1.55686
73119PK4 36	R	889.601	403.763	2.20328	18.3972	8.08164	0.121879	8.34167	0.0162692	2.06652	0.0056681	8.51925	0.247735	10.9096	104.034	2.13264	116.774	9.20169	385.812	181.57	104.034	2.13264
73119PK4 21	R	1014.71	667.162	1.52093	18.1271	4.95003	0.123741	5.23708	0.0162754	1.71003	0.00567989	6.80019	0.326524	12.1436	104.073	1.7654	118.458	5.85557	418.937	110.573	104.073	1.7654
73119PK4 5	R	615.485	268.273	2.29425	17.027	11.636	0.131809	11.7517	0.0162843	1.64517	0.00603476	10.4248	0.139994	17.1741	104.13	1.69935	125.721	13.8966	557.108	253.99	104.13	1.69935
73119PK4 50	R	590.527	204.242	2.89131	17.3524	10.4669	0.129359	10.6042	0.0162871	1.70072	0.00512246	14.6699	0.160382	15.6846	104.148	1.75703	123.521	12.3332	515.659	230.058	104.148	1.75703
73119PK4 99	R	506.774	164.489	3.08091	15.1538	12.7987	0.148139	13.0067	0.0162884	2.31678	0.00539355	16.9034	0.178123	25.7449	104.156	2.39367	140.267	17.0405	806.043	268.189	104.156	2.39367
73119PK4 97	R	561.22	171.134	3.27943	15.9877	10.4238	0.140515	10.6257	0.0163004	2.06177	0.00496876	16.6073	0.194036	21.9252	104.232	2.13174	133.503	13.2928	692.876	222.371	104.232	2.13174
73119PK4 63	R	417.383	151.019	2.76378	16.212	11.1855	0.138646	11.4785	0.0163092	2.57691	0.0052128	13.7034	0.224499	20.8966	104.288	2.66578	131.837	14.1919	663.102	239.805	104.288	2.66578
73119PK4 93	R	223.962	83.678	2.67647	9.82875	24.9207	0.228746	25.1622	0.0163132	3.4778	0.00512866	23.8784	0.138215	50.1282	104.313	3.59862	209.163	47.5719	1656.13	463.484	104.313	3.59862
73119PK4 45	R	1252.93	560.391	2.23581	18.7106	6.39748	0.120214	6.58199	0.0163203	1.54752	0.00542218	6.41433	0.235114	9.46287	104.358	1.60196	115.266	7.17203	347.744	144.7	104.358	1.60196
73119PK4 12	R	489.197	179.281	2.72865	17.228	8.24523	0.130686	8.50078	0.0163361	2.06868	0.00566293	13.1792	0.243352	16.2412	104.459	2.1435	124.714	9.9765	531.488	180.666	104.459	2.1435
73119PK4 24	R	544.916	227.897	2.39106	16.549	11.2966	0.136173	11.4365	0.0163512	1.78282	0.00572145	10.4154	0.15589	19.3439	104.554	1.84898	129.629	13.9179	618.871	243.986	104.554	1.84898
73119PK4 15	R	699.153	264.3	2.6453	17.3471	8.48277	0.129943	8.67437	0.0163557	1.81309	0.00563801	8.48011	0.209017	15.6909	104.583	1.88089	124.047	10.1291	516.327	186.352	104.583	1.88089
73119PK4 64	R	924.116	391.518	2.36034	17.5157	7.10446	0.128733	7.27114	0.0163609	1.54794	0.0054777	8.10243	0.212888	14.9183	104.616	1.60632	122.959	8.42045	495.095	156.639	104.616	1.60632
73119PK4 46	R	296.001	86.9002	3.40622	13.1489	13.3739	0.17194	13.7088	0.0164041	3.01151	0.00577496	19.2473	0.219678	34.892	104.89	3.1332	161.101	20.4227	1096.43	267.971	104.89	3.1332
73119PK4 7	R	745.551	316.106	2.35855	18.3597	10.3442	0.123206	10.5428	0.0164128	2.0367	0.0060393	9.08222	0.193184	11.0441	104.945	2.1201	117.974	11.7425	390.398	232.341	104.945	2.1201
73119PK4 2	R	750.34	376.788	1.99141	17.5717	6.98859	0.129004	7.15246	0.0164476	1.52228	0.00549913	7.13307	0.212833	14.6397	105.166	1.58793	123.202	8.2984	488.018	154.295	105.166	1.58793
73119PK4 9	R	926.436	278.718	3.32391	17.9768	8.56174	0.126152	8.72706	0.0164549	1.69065	0.00575369	6.90114	0.193725	12.7847	105.212	1.76432	120.634	9.92657	437.504	190.665	105.212	1.76432
73119PK4 48	R	809.057	403.241	2.00639	17.941	5.43788	0.126576	5.7096	0.0164774	1.74042	0.00522065	9.88557	0.304822	12.9423	105.354	1.8187	121.017	6.51372	441.93	121.006	105.354	1.8187
73119PK4 19	R	1082.97	517.886	2.09113	18.6859	7.6807	0.121552	7.83104	0.0164803	1.52708	0.00582138	6.39416	0.195003	9.5345	105.373	1.59604	116.478	8.61778	350.732	173.629	105.373	1.59604
73119PK4 57	R	409.906	107.89	3.79932	16.7053	9.94912	0.136395	10.1796	0.0165326	2.15376	0.00510081	20.1584	0.211577	18.5811	105.704	2.25806	129.828	12.406	598.582	215.569	105.704	2.25806
73119PK4 3	R	360.898	97.2992	3.70916	14.4111	12.8319	0.158378	13.0618	0.0165607	2.43998	0.00529195	18.502	0.186802	29.0721	105.883	2.56241	149.282	18.1338	910.367	264.513	105.883	2.56241			PeakFit Output (using analyses with ages <110 Ma to isolate the two prominent age modes in PDP)
73119PK4 13	R	607.898	246.415	2.46697	17.9349	8.64963	0.127475	8.7987	0.0165887	1.61277	0.00573056	9.23824	0.183296	12.9415	106.06	1.69652	121.827	10.1012	442.691	192.489	106.06	1.69652			[1] "Peak 1: 102.75 ± 0.14 | 0.28 (72.37%)"
73119PK4 18	R	644.041	213.492	3.0167	17.7118	8.09782	0.129401	8.246	0.0166299	1.55625	0.00571594	8.13472	0.188728	13.9512	106.322	1.64106	123.56	9.59328	470.503	179.337	106.322	1.64106			[2] "Peak 2: 106.23 ± 0.31 | 0.60 (27.63%)"
73119PK4 79	R	646.163	341.167	1.89398	17.2086	8.27547	0.133378	8.45589	0.0166539	1.7374	0.00546915	7.10275	0.205466	16.2469	106.474	1.83468	127.128	10.1042	533.95	181.251	106.474	1.83468
73119PK4 44	R	1140.15	628.797	1.81323	17.6201	6.41474	0.13059	6.55075	0.0166958	1.32792	0.00583491	6.76989	0.202713	14.3534	106.739	1.40574	124.628	7.68293	481.979	141.731	106.739	1.40574
73119PK4 73	R	710.951	75.6566	9.39708	16.2204	7.61442	0.142213	7.77827	0.0167375	1.58809	0.00589141	22.3856	0.204171	20.7458	107.004	1.6853	135.013	9.83354	661.995	163.177	107.004	1.6853
73119PK4 90	R	291.201	120.161	2.42343	15.1199	12.7572	0.152594	12.962	0.0167407	2.29492	0.00492214	16.7152	0.17705	25.7806	107.024	2.43585	144.2	17.4251	810.73	267.126	107.024	2.43585
73119PK4 66	R	883.593	421.588	2.09587	16.5092	9.60768	0.139988	9.74839	0.0167688	1.65031	0.00587979	7.31148	0.169291	19.4165	107.203	1.75455	133.033	12.1551	624.063	207.329	107.203	1.75455
73119PK4 54	R	600.897	274.909	2.18581	17.9319	8.58164	0.129096	8.8808	0.0167968	2.28564	0.00538555	9.3388	0.257369	12.9012	107.38	2.43399	123.285	10.3102	443.065	190.919	107.38	2.43399
73119PK4 62	R	1197.31	832.552	1.43812	19.3839	5.2641	0.119542	5.49228	0.0168132	1.56665	0.00584236	4.66717	0.285245	6.25622	107.484	1.66993	114.657	5.95478	267.23	120.78	107.484	1.66993
73119PK4 6	R	361.098	121.875	2.96286	16.6215	14.2132	0.139431	14.4248	0.0168157	2.46131	0.00600053	15.9781	0.170631	18.8906	107.5	2.62396	132.537	17.9234	609.428	307.572	107.5	2.62396
73119PK4 75	R	825.558	336.523	2.4532	18.8352	7.08653	0.123082	7.28281	0.016821	1.67938	0.00577125	9.25145	0.230595	8.76363	107.533	1.79091	117.862	8.10427	332.759	160.696	107.533	1.79091
73119PK4 28	R	640.251	252.467	2.53598	16.8616	7.73593	0.137558	7.97617	0.0168296	1.94287	0.00611714	11.3608	0.243585	17.7883	107.588	2.07295	130.867	9.79358	578.36	168.113	107.588	2.07295
73119PK4 84	R	466.152	214.64	2.17178	15.4129	10.0385	0.150636	10.3231	0.0168462	2.40705	0.00588156	10.5767	0.233172	24.4121	107.693	2.57069	142.474	13.7227	770.454	211.428	107.693	2.57069
73119PK4 37	R	364.424	114.026	3.19598	14.8483	13.162	0.15672	13.3741	0.0168845	2.3721	0.00543792	20.685	0.177366	26.9856	107.936	2.53903	147.828	18.3993	848.532	273.965	107.936	2.53903
73119PK4 34	R	634.09	391.939	1.61783	17.23	9.6066	0.14123	9.75854	0.0176563	1.71531	0.00544267	8.07066	0.175775	15.8879	112.827	1.91849	134.139	12.2623	531.226	210.573	112.827	1.91849	Y
73119PK4 35	R	906.252	505.903	1.79135	17.4883	6.82007	0.139758	7.04325	0.0177342	1.759	0.00595891	6.13581	0.249743	14.6867	113.32	1.97588	132.828	8.76938	498.501	150.292	113.32	1.97588	Y
73119PK4 1	R	233.532	67.6296	3.4531	14.537	22.4003	0.173054	22.6346	0.0182533	3.24775	0.0055318	33.3349	0.143486	28.0492	116.608	3.75308	162.066	33.9083	892.453	463.89	116.608	3.75308	Y
73119PK4 96	R	1742.97	486.189	3.58496	19.4598	3.68095	0.133723	3.9581	0.0188813	1.45506	0.00627862	5.84176	0.367617	5.37943	120.582	1.73824	127.438	4.74042	258.291	84.5864	120.582	1.73824	Y
MANTLES
73119PK4 56	M	418.349	120.195	3.48059	15.0282	14.6079	0.148719	14.7162	0.0162167	1.78142	0.00566471	17.1314	0.121052	26.3385	103.701	1.83257	140.781	19.346	823.474	305.295	103.701	1.83257
73119PK4 87	M	1058.27	552.399	1.91577	18.6214	5.08479	0.121521	5.34651	0.0164192	1.65232	0.00535075	6.28578	0.309046	9.84524	104.985	1.72064	116.45	5.88229	358.538	114.755	104.985	1.72064
73119PK4 81	M	784.961	344.528	2.27837	17.676	7.53916	0.128088	7.69576	0.0164278	1.54462	0.00504764	7.70892	0.20071	14.1676	105.04	1.60932	122.378	8.87257	474.941	166.821	105.04	1.60932
73119PK4 88	M	350.178	115.599	3.02926	13.3527	17.2977	0.17026	17.5656	0.0164956	3.05603	0.00539799	17.558	0.173978	33.9344	105.47	3.19697	159.644	25.9505	1065.61	348.407	105.47	3.19697
73119PK4 52	M	151.31	21.9489	6.89374	10.5552	30.7077	0.221969	32.1356	0.0169999	9.47273	0.0126261	31.2499	0.294773	46.6133	108.667	10.2075	203.548	59.2888	1522.9	582.276	108.667	10.2075
73119PK4 42	M	673.975	202.383	3.33019	17.6858	7.96276	0.142606	8.10647	0.0183	1.51963	0.00509075	10.3764	0.187459	13.6371	116.903	1.76048	135.362	10.2732	473.729	176.205	116.903	1.76048
CORES
73119PK4 47	C	231.805	67.5706	3.43056	13.8763	16.2345	0.182137	16.4754	0.0183382	2.80732	0.00650106	24.6226	0.170395	31.0496	117.145	3.25893	169.898	25.7762	987.779	330.797	117.145	3.25893
8219PK2
6/8 SE = 0.43; 6/7 SE = 0.45
RIMS
8219PK2 81	R	479.006	204.299	2.34463	15.6136	12.3832	0.137839	12.7456	0.0156158	3.01765	0.00470733	12.9344	0.236761	23.8182	99.8878	2.99103	131.118	15.678	743.158	262.082	99.8878	2.99103
8219PK2 51	R	844.545	263.077	3.21026	17.7915	6.26699	0.121208	6.53183	0.0156471	1.84111	0.00480831	8.78969	0.281867	13.8423	100.087	1.82847	116.167	7.16989	460.513	139.02	100.087	1.82847
8219PK2 48	R	1273.79	572.876	2.22349	17.5784	5.6541	0.122741	5.8355	0.0156551	1.44368	0.0051147	7.20013	0.247396	14.8157	100.137	1.43449	117.554	6.47766	487.193	124.847	100.137	1.43449	Y
8219PK2 97	R	682.94	299.536	2.27999	16.9353	6.19849	0.127456	6.61883	0.0156617	2.32111	0.00468792	12.1824	0.350683	17.7568	100.179	2.3073	121.809	7.59753	568.898	134.978	100.179	2.3073
8219PK2 26	R	492.199	148.171	3.32183	16.5802	12.9598	0.130308	13.0525	0.0156765	1.55295	0.00462934	16.0815	0.118977	19.3781	100.273	1.54514	124.374	15.2794	614.801	280.161	100.273	1.54514
8219PK2 32	R	757.4	218.121	3.47239	17.6322	10.4916	0.123069	10.6275	0.015745	1.69442	0.00442523	14.3577	0.159437	14.546	100.708	1.69315	117.85	11.8252	480.426	231.997	100.708	1.69315
8219PK2 87	R	698.874	302.284	2.31198	17.9959	7.85603	0.120615	8.06576	0.0157494	1.82734	0.00486579	9.88746	0.226555	12.8804	100.736	1.82648	115.629	8.81501	435.13	174.964	100.736	1.82648
8219PK2 8	R	591.501	222.174	2.66233	16.2461	13.1668	0.133676	13.3878	0.0157576	2.42254	0.00424786	14.3693	0.180952	20.8857	100.788	2.42263	127.395	16.0291	658.603	282.58	100.788	2.42263
8219PK2 72	R	570.984	165.531	3.44941	15.0802	12.2992	0.144033	12.505	0.01576	2.25928	0.00544383	12.5089	0.180671	26.2217	100.803	2.25971	136.63	15.9862	816.269	257.244	100.803	2.25971
8219PK2 57	R	530.921	155.106	3.42296	15.8969	11.8347	0.136843	12.0829	0.0157842	2.43675	0.00500049	14.1904	0.201669	22.4769	100.957	2.4409	130.228	14.7683	705.054	251.999	100.957	2.4409
8219PK2 30	R	487.256	131.269	3.71188	13.9405	10.8533	0.156591	11.0979	0.0158392	2.31704	0.00476198	17.056	0.208782	31.4178	101.306	2.32895	147.715	15.2568	978.384	221.297	101.306	2.32895
8219PK2 58	R	423.21	89.1938	4.74483	13.7779	14.5864	0.158603	14.8329	0.0158556	2.69328	0.00506656	35.362	0.181575	32.1582	101.41	2.70988	149.48	20.6181	1002.23	296.5	101.41	2.70988
8219PK2 75	R	916.027	380.912	2.40483	16.2234	10.4094	0.135276	10.5188	0.0159239	1.51281	0.00531211	7.62082	0.14382	20.9459	101.843	1.52859	128.827	12.7268	661.602	223.21	101.843	1.52859
8219PK2 6	R	445.677	113.028	3.94307	15.3221	12.908	0.143568	13.3166	0.0159611	3.27346	0.00512571	19.1214	0.245818	25.061	102.08	3.31522	136.217	16.9757	782.878	271.486	102.08	3.31522
8219PK2 31	R	512.646	151.83	3.37644	15.9641	12.9986	0.137836	13.1888	0.0159659	2.23183	0.00441067	17.6118	0.169221	22.1214	102.11	2.26097	131.114	16.2229	696.03	277.239	102.11	2.26097
8219PK2 38	R	539.258	172.88	3.11926	15.9339	9.38036	0.138174	9.58076	0.0159748	1.94932	0.00505455	14.5241	0.203462	22.2575	102.166	1.97585	131.416	11.8101	700.068	199.852	102.166	1.97585
8219PK2 2	R	498.178	151.72	3.28354	16.1178	14.7393	0.136617	14.9131	0.0159772	2.26968	0.00474188	18.9943	0.152195	21.4149	102.181	2.30091	130.026	18.2012	675.591	315.565	102.181	2.30091
8219PK2 46	R	494.025	129.818	3.80553	15.1283	11.5133	0.145621	11.8868	0.0159845	2.95631	0.00523997	16.964	0.248706	25.942	102.228	2.99834	138.038	15.3421	809.567	241.039	102.228	2.99834
8219PK2 62	R	981.892	475.165	2.06642	18.7098	6.48154	0.117753	6.75758	0.0159855	1.91169	0.00463302	8.56739	0.282896	9.55324	102.234	1.93899	113.032	7.22849	347.842	146.6	102.234	1.93899
8219PK2 98	R	407.105	97.9615	4.15577	14.4439	14.9682	0.15266	15.1044	0.0159992	2.02385	0.00506086	25.3835	0.133991	29.0708	102.321	2.05447	144.258	20.3129	905.684	308.877	102.321	2.05447
8219PK2 91	R	424.253	105.374	4.02618	15.1953	15.8726	0.145126	16.0263	0.0160008	2.21366	0.00506456	25.6327	0.138127	25.6311	102.331	2.24738	137.599	20.6238	800.318	333.024	102.331	2.24738
8219PK2 100	R	391.804	97.9231	4.00114	17.1156	12.8572	0.129033	13.1111	0.0160243	2.56813	0.006034	18.3761	0.195874	16.8368	102.481	2.61103	123.228	15.215	545.802	281.221	102.481	2.61103
8219PK2 95	R	465.674	117.646	3.95826	13.511	12.7786	0.163469	12.9607	0.0160255	2.16521	0.00525899	15.2483	0.16706	33.3348	102.488	2.20153	153.735	18.4906	1041.82	258.121	102.488	2.20153
8219PK2 76	R	628.264	177.485	3.53981	16.8595	9.48457	0.131026	9.66153	0.0160284	1.84066	0.00505707	12.0686	0.190514	18.0076	102.506	1.87187	125.019	11.3649	578.652	206.234	102.506	1.87187
8219PK2 7	R	414.739	105.014	3.94936	14.722	11.8044	0.150051	12.0217	0.0160285	2.27495	0.00548356	16.9835	0.189238	27.7902	102.507	2.31354	141.957	15.9267	866.308	244.988	102.507	2.31354
8219PK2 83	R	482.452	110.689	4.35863	15.3535	11.2141	0.143907	11.3783	0.0160315	1.92629	0.00548913	22.3376	0.169295	24.8989	102.526	1.95933	136.518	14.5347	778.579	235.947	102.526	1.95933
8219PK2 86	R	561.12	206.104	2.72251	15.9674	10.8142	0.138384	10.9914	0.0160327	1.96535	0.00515855	10.7367	0.178808	22.0888	102.534	1.9992	131.603	13.567	695.611	230.616	102.534	1.9992
8219PK2 92	R	554.137	168.275	3.29305	16.211	11.2714	0.136329	11.4302	0.0160357	1.89884	0.0047316	16.3928	0.166125	20.9731	102.552	1.9319	129.769	13.9243	663.234	241.613	102.552	1.9319
8219PK2 70	R	559.949	146.917	3.81132	16.2514	12.9857	0.136205	13.1855	0.016061	2.28686	0.00585925	15.5223	0.173437	20.7817	102.713	2.33029	129.658	16.0499	657.91	278.72	102.713	2.33029
8219PK2 94	R	720.699	351.927	2.04786	17.9197	7.90941	0.123568	8.10928	0.0160666	1.78933	0.00454837	8.5296	0.220652	13.1467	102.749	1.82394	118.301	9.05568	444.578	175.933	102.749	1.82394
8219PK2 10	R	676.532	275.19	2.45842	17.865	10.9833	0.124022	11.1435	0.0160764	1.88304	0.00527699	10.7408	0.168981	13.3946	102.811	1.92061	118.712	12.4848	451.375	244.093	102.811	1.92061
8219PK2 41	R	509.201	130.15	3.91241	15.3086	12.0957	0.144749	12.2898	0.0160783	2.17533	0.00641431	17.3596	0.177003	25.0917	102.823	2.219	137.265	15.7793	784.725	254.284	102.823	2.219
8219PK2 11	R	862.591	411.733	2.09503	18.373	8.35049	0.120622	8.5468	0.0160803	1.8213	0.00507761	7.32544	0.213097	11.0694	102.836	1.85809	115.636	9.34125	388.77	187.573	102.836	1.85809
8219PK2 54	R	382.912	120.917	3.16673	15.1171	10.404	0.146789	10.7087	0.0161009	2.53603	0.00495491	18.2404	0.236821	25.9623	102.967	2.59052	139.073	13.9182	811.15	217.762	102.967	2.59052
8219PK2 36	R	166.116	29.9255	5.55098	10.2548	30.0126	0.216407	30.2679	0.0161022	3.92289	0.00709006	51.1764	0.129606	48.2318	102.975	4.00748	198.915	54.6901	1577.12	564.917	102.975	4.00748
8219PK2 22	R	1373.4	565.652	2.42799	19.2828	4.39886	0.115139	4.57931	0.0161094	1.27283	0.00556939	5.27323	0.277952	6.89998	103.02	1.30085	110.656	4.80092	279.255	100.707	103.02	1.30085
8219PK2 59	R	769.188	233.29	3.29713	17.4321	7.60499	0.127377	7.82168	0.0161113	1.82834	0.00553464	9.38276	0.233753	15.3658	103.032	1.86881	121.738	8.97338	505.587	167.389	103.032	1.86881
8219PK2 42	R	496.383	133.95	3.70573	17.5309	12.1717	0.126698	12.3713	0.0161161	2.21349	0.00532062	19.1852	0.178922	14.9129	103.063	2.26315	121.126	14.1258	493.174	268.609	103.063	2.26315
8219PK2 5	R	574.986	151.685	3.79066	16.7283	8.38805	0.132817	8.59668	0.016121	1.88246	0.00500055	13.8254	0.218975	18.5838	103.094	1.92526	126.626	10.2343	595.591	181.85	103.094	1.92526
8219PK2 20	R	564.859	190.746	2.96132	15.0346	10.2143	0.147796	10.413	0.0161229	2.02451	0.0048717	10.9614	0.194422	26.334	103.106	2.07078	139.964	13.6147	822.586	213.378	103.106	2.07078
8219PK2 61	R	793.327	356.707	2.22403	17.6338	8.65725	0.126041	8.77074	0.0161267	1.40634	0.00516164	7.78747	0.160345	14.4391	103.13	1.43882	120.534	9.96845	480.224	191.411	103.13	1.43882
8219PK2 50	R	776.131	232.998	3.33107	16.3793	7.96161	0.135739	8.14371	0.016132	1.71251	0.00537054	10.387	0.210287	20.178	103.163	1.75262	129.242	9.88284	641.118	171.248	103.163	1.75262
8219PK2 21	R	324.624	71.7216	4.52618	15.7093	13.0232	0.141549	13.2629	0.0161343	2.51002	0.00471643	24.9747	0.189251	23.2433	103.178	2.56918	134.423	16.699	730.262	276.219	103.178	2.56918
8219PK2 23	R	571.195	155.356	3.67669	15.6306	12.4724	0.142279	12.5763	0.0161363	1.61322	0.00519586	14.7702	0.128274	23.603	103.191	1.65145	135.072	15.906	740.856	264.072	103.191	1.65145
8219PK2 71	R	449.011	123.056	3.64884	16.095	10.6066	0.138204	10.9112	0.0161399	2.56027	0.00559772	17.3722	0.234646	21.4766	103.214	2.62151	131.443	13.4527	678.603	226.765	103.214	2.62151
8219PK2 28	R	594.47	199.19	2.98444	16.0703	10.85	0.13846	10.992	0.0161449	1.76122	0.00527462	13.0945	0.160228	21.5885	103.246	1.8039	131.671	13.5744	681.889	231.85	103.246	1.8039
8219PK2 85	R	682.613	173.64	3.9312	16.3611	9.90744	0.136011	10.0835	0.0161463	1.87625	0.00564834	14.5197	0.186071	20.2572	103.255	1.92188	129.484	12.2585	643.499	213.063	103.255	1.92188
8219PK2 64	R	601.62	184.064	3.26854	14.9557	10.101	0.148861	10.2423	0.0161539	1.69545	0.00487378	15.3338	0.165534	26.6868	103.303	1.73749	140.906	13.4757	833.559	210.641	103.303	1.73749
8219PK2 79	R	554.05	138.444	4.00198	16.2908	12.7203	0.136704	12.9142	0.0161589	2.22948	0.00537207	18.067	0.172638	20.5757	103.334	2.28546	130.104	15.7704	652.728	273.248	103.334	2.28546
8219PK2 37	R	990.841	328.403	3.01715	19.0312	7.34634	0.117037	7.45777	0.0161613	1.28436	0.00526055	9.1585	0.172217	8.03744	103.35	1.31679	112.382	7.93409	309.194	167.287	103.35	1.31679
8219PK2 68	R	475.299	153.762	3.09114	14.5374	12.3167	0.153283	12.4581	0.0161685	1.87181	0.00483401	13.4779	0.150248	28.5979	103.395	1.91992	144.807	16.8132	892.392	254.55	103.395	1.91992
8219PK2 56	R	493.809	134.71	3.66571	16.2383	10.1137	0.137239	10.4832	0.0161698	2.75854	0.00520772	16.0108	0.263139	20.8129	103.404	2.82967	130.581	12.8456	659.64	216.928	103.404	2.82967
8219PK2 3	R	650.475	177.706	3.6604	17.1432	8.77529	0.130042	8.93637	0.0161757	1.68909	0.00487735	14.4724	0.189013	16.6709	103.441	1.73327	124.136	10.442	542.277	191.978	103.441	1.73327
8219PK2 88	R	617.853	198.886	3.10657	17.1197	10.7336	0.130361	10.9357	0.0161932	2.0927	0.00524437	12.3813	0.191364	16.7737	103.552	2.14972	124.422	12.8059	545.243	234.741	103.552	2.14972
8219PK2 69	R	415.311	104.364	3.97943	15.5062	12.8471	0.143995	12.9895	0.0162009	1.9186	0.00540013	19.8839	0.147703	24.1551	103.601	1.9718	136.596	16.6018	757.732	271.308	103.601	1.9718
8219PK2 99	R	439.136	98.1373	4.47471	15.4024	12.8557	0.145003	13.0786	0.0162052	2.40464	0.00553896	19.9512	0.18386	24.6291	103.628	2.47196	137.491	16.818	771.889	270.799	103.628	2.47196
8219PK2 45	R	692.554	212.838	3.2539	17.9843	9.43806	0.124262	9.61782	0.0162151	1.85082	0.00520863	11.837	0.192437	12.8124	103.691	1.90378	118.928	10.7939	436.567	210.231	103.691	1.90378
8219PK2 33	R	298.958	87.6819	3.40957	15.0794	19.2851	0.148262	19.4923	0.0162219	2.835	0.00429445	25.6807	0.145442	26.1031	103.734	2.91732	140.376	25.5568	816.379	403.896	103.734	2.91732
8219PK2 47	R	227.193	46.3192	4.90494	13.1774	18.4184	0.169738	18.7331	0.0162292	3.41901	0.00619219	26.2252	0.182512	34.8081	103.78	3.51985	159.192	27.6031	1092.09	369.647	103.78	3.51985
8219PK2 19	R	418.852	94.654	4.42509	13.7497	17.0745	0.16268	17.2404	0.0162299	2.38595	0.0052782	22.0205	0.138393	32.1874	103.784	2.45641	153.046	24.4946	1006.39	347.033	103.784	2.45641
8219PK2 65	R	512.025	158.029	3.24006	16.857	12.3553	0.132796	12.474	0.0162425	1.71718	0.00497091	16.0164	0.13766	17.963	103.864	1.76924	126.607	14.8483	578.951	268.7	103.864	1.76924
8219PK2 27	R	658.709	232.852	2.82888	15.631	11.0409	0.143219	11.2722	0.0162433	2.27171	0.00504258	8.91691	0.201532	23.573	103.87	2.3407	135.907	14.339	740.805	233.72	103.87	2.3407
8219PK2 53	R	382.064	91.1602	4.19113	14.258	11.7375	0.157055	12.0734	0.0162478	2.82799	0.00582011	21.8958	0.234233	29.8559	103.899	2.91469	148.122	16.6405	932.365	241.056	103.899	2.91469
8219PK2 52	R	426.191	148.002	2.87963	13.7746	16.1566	0.162594	16.3286	0.0162506	2.36369	0.00527611	18.9529	0.144758	32.068	103.916	2.43657	152.971	23.1886	1002.72	328.5	103.916	2.43657
8219PK2 90	R	779.692	285.616	2.72986	18.8505	8.05823	0.118825	8.23963	0.0162524	1.71942	0.00549016	10.156	0.208677	8.8405	103.928	1.77262	114.006	8.8856	330.919	182.812	103.928	1.77262
8219PK2 44	R	1803.6	616.295	2.92652	19.2403	4.23408	0.11645	4.53657	0.016257	1.62883	0.00548476	5.49803	0.359044	7.05609	103.956	1.67969	111.849	4.80462	284.285	96.8391	103.956	1.67969
8219PK2 24	R	737.036	225.917	3.26243	16.5434	9.32582	0.135496	9.45568	0.0162644	1.56168	0.00509658	9.4683	0.165158	19.392	104.004	1.61117	129.024	11.4569	619.591	201.35	104.004	1.61117
8219PK2 74	R	545.808	134.806	4.04884	16.1537	9.79308	0.138807	10.015	0.0162694	2.09665	0.00565382	16.0656	0.209351	21.1738	104.035	2.16375	131.98	12.395	670.826	209.618	104.035	2.16375
8219PK2 16	R	410.938	147.102	2.79355	15.6556	11.1766	0.143327	11.4417	0.0162812	2.4487	0.00454099	21.5324	0.214016	23.4502	104.11	2.52888	136.003	14.5642	737.509	236.725	104.11	2.52888
8219PK2 9	R	446.262	115.084	3.8777	15.3323	19.3194	0.146366	19.4694	0.016283	2.41237	0.00538331	31.3378	0.123906	24.9292	104.122	2.49163	138.698	25.2419	781.478	406.898	104.122	2.49163
8219PK2 15	R	407.884	81.7536	4.98919	15.3119	13.7714	0.146563	13.9459	0.0162832	2.19906	0.00569699	18.5843	0.157686	25.0225	104.123	2.27134	138.872	18.1014	784.275	289.592	104.123	2.27134
8219PK2 25	R	631.471	228.735	2.76071	16.9311	9.16418	0.132679	9.34087	0.0162996	1.8082	0.00521579	10.756	0.19358	17.6091	104.227	1.86947	126.502	11.1101	569.44	199.505	104.227	1.86947
8219PK2 78	R	526.651	143.625	3.66683	16.3329	8.81952	0.13757	9.19215	0.0163033	2.5907	0.00565081	14.5877	0.281839	20.3451	104.25	2.67909	130.877	11.2875	647.208	189.523	104.25	2.67909
8219PK2 39	R	475.17	122.889	3.86667	16.2625	9.96172	0.13839	10.2114	0.0163298	2.24429	0.00461853	18.8354	0.219783	20.6602	104.418	2.32458	131.609	12.6048	656.438	213.743	104.418	2.32458
8219PK2 18	R	558.764	123.463	4.52577	14.8477	11.4605	0.151892	11.6449	0.0163637	2.06443	0.00546944	16.5964	0.177282	27.126	104.634	2.14266	143.581	15.5919	848.616	238.431	104.634	2.14266
8219PK2 49	R	525.441	145.251	3.61747	16.7215	7.51585	0.135299	7.80177	0.0164157	2.09277	0.00532658	12.7308	0.268243	18.5375	104.963	2.17885	128.848	9.44086	596.47	162.874	104.963	2.17885
8219PK2 84	R	765.92	240.323	3.18704	17.5831	7.29639	0.128733	7.5827	0.0164237	2.064	0.00597875	7.66988	0.272198	14.5938	105.014	2.14993	122.958	8.78122	486.596	161.134	105.014	2.14993
8219PK2 55	R	667.508	258.451	2.58272	17.6176	8.90591	0.128568	9.05616	0.0164349	1.64277	0.00562443	8.11151	0.181398	14.4328	105.085	1.71231	122.81	10.4757	482.294	196.825	105.085	1.71231
8219PK2 43	R	928.783	427.684	2.17165	18.192	7.55164	0.12453	7.71183	0.0164378	1.56364	0.00556957	7.00371	0.202759	11.8044	105.104	1.63011	119.171	8.67149	410.946	168.954	105.104	1.63011
8219PK2 73	R	554.741	125.955	4.40429	17.152	10.5217	0.132216	10.7191	0.0164545	2.0476	0.00488264	16.4085	0.191024	16.5578	105.209	2.13679	126.087	12.71	541.155	230.254	105.209	2.13679
8219PK2 29	R	461.574	125.493	3.67809	16.4169	10.1092	0.13829	10.3246	0.0164729	2.09787	0.00505759	20.7917	0.203191	19.9162	105.326	2.19166	131.52	12.7365	636.178	217.642	105.326	2.19166
8219PK2 40	R	430.595	98.054	4.39141	13.894	15.2382	0.16384	15.372	0.0165171	2.02353	0.00445681	20.7684	0.131637	31.4507	105.606	2.11957	154.059	21.9737	985.177	310.572	105.606	2.11957
8219PK2 82	R	618.421	176.693	3.49997	17.2787	11.0023	0.131764	11.137	0.0165194	1.72688	0.00553768	20.0431	0.155057	15.9613	105.621	1.80908	125.681	13.1657	525.003	241.453	105.621	1.80908
8219PK2 77	R	368.456	102.245	3.60365	14.9328	18.445	0.152716	18.6132	0.0165467	2.49704	0.00491244	29.5461	0.134154	26.688	105.794	2.62016	144.307	25.04	836.758	384.944	105.794	2.62016
8219PK2 17	R	511.949	127.681	4.0096	14.5653	12.0693	0.156803	12.2296	0.0165715	1.97336	0.00574374	16.2565	0.161359	28.3634	105.951	2.07371	147.901	16.8324	888.416	249.584	105.951	2.07371
8219PK2 14	R	364.055	93.3183	3.90122	15.5366	14.0554	0.147209	14.2419	0.0165951	2.29736	0.00502594	25.8927	0.16131	23.9119	106.101	2.41757	139.445	18.5567	753.594	297.046	106.101	2.41757
8219PK2 60	R	800.836	355.693	2.25148	18.242	6.71909	0.12552	6.98998	0.016614	1.92708	0.00572616	8.1676	0.275691	11.5302	106.221	2.03018	120.064	7.91532	404.809	150.459	106.221	2.03018
8219PK2 96	R	342.041	74.3881	4.59806	15.7323	12.2659	0.145574	12.4581	0.0166173	2.17968	0.00527148	23.3595	0.174962	23.0109	106.242	2.29676	137.996	16.0749	727.124	260.25	106.242	2.29676
8219PK2 63	R	682.97	202.789	3.36789	18.5686	8.8331	0.123765	8.9751	0.0166749	1.59019	0.00561294	12.056	0.177178	10.0207	106.607	1.68131	118.48	10.0368	364.947	199.205	106.607	1.68131
8219PK2 12	R	562.988	144.827	3.88731	17.4788	6.57773	0.131567	6.81216	0.0166857	1.77172	0.00560704	10.4646	0.260081	15.0027	106.675	1.87443	125.505	8.04235	499.746	144.892	106.675	1.87443
8219PK2 13	R	702.887	184.325	3.8133	17.5035	7.96982	0.132693	8.16463	0.0168524	1.77293	0.00637959	10.2753	0.217147	14.8463	107.732	1.89414	126.515	9.71195	496.632	175.71	107.732	1.89414	Y
8219PK2 4	R	224.776	47.1769	4.76454	15.2953	25.0154	0.152597	25.3188	0.0169353	3.90743	0.0065621	37.7154	0.154329	24.9265	108.258	4.19478	144.203	34.0394	786.553	527.194	108.258	4.19478
8219PK2 67	R	904.493	453.618	1.99395	17.2241	8.68766	0.135545	8.80082	0.0169398	1.40676	0.00610884	8.66819	0.159844	16.1014	108.287	1.51061	129.068	10.6669	531.979	190.351	108.287	1.51061	Y
8219PK2 35	R	631.429	219.369	2.87839	16.479	8.39728	0.141782	8.58081	0.0169528	1.76519	0.00610377	10.1308	0.205714	19.5063	108.369	1.89693	134.63	10.8193	628.004	181.011	108.369	1.89693	Y
8219PK2 34	R	800.442	402.845	1.98697	17.6423	7.35401	0.138335	7.62467	0.0177083	2.0135	0.00643429	6.14816	0.264077	13.989	113.156	2.25852	131.56	9.40842	479.154	162.573	113.156	2.25852	Y
MANTLES
8219PK2 66	M	657.878	176.959	3.71769	16.8394	7.59716	0.130073	7.90773	0.0158928	2.1944	0.00505484	14.0024	0.2775	18.135	101.646	2.21303	124.163	9.24197	581.22	165.057	101.646	2.21303
8219PK2 1	M	492.5	126.98	3.87856	16.421	11.3863	0.133437	11.5608	0.0158988	2.00121	0.00469111	22.2551	0.173102	20.0481	101.684	2.01894	127.181	13.8199	635.639	245.244	101.684	2.01894
8219PK2 89	M	877.25	407.823	2.15106	16.8517	6.57081	0.131713	6.80757	0.016105	1.77974	0.00512751	7.20588	0.261435	18.0233	102.992	1.81842	125.636	8.04483	579.619	142.805	102.992	1.81842
8219PK2 80	M	368.957	95.8567	3.84904	15.0358	14.2573	0.155451	14.6975	0.0169592	3.57036	0.00514316	20.9116	0.242922	26.1079	108.41	3.83825	146.713	20.0784	822.427	297.995	108.41	3.83825
8219PK2 93	M	1252.88	554.124	2.26101	18.609	4.30406	0.126308	4.66129	0.0170545	1.78961	0.0063723	6.43718	0.38393	9.73788	109.014	1.93451	120.774	5.30774	360.045	97.1075	109.014	1.93451
Notes
	1. Analyses with >20% uncertainty (2-sigma) in 206Pb/238U age are not included.
	2. Analyses with >20% uncertainty (2-sigma) in 206Pb/207Pb age are not included, unless 206Pb/238U age is <400 Ma.
	3. Best age is determined from 206Pb/238U age for analyses with 206Pb/238U age <900 Ma and from 206Pb/207Pb age for analyses with 206Pb/238Uage >900 Ma.
	4. Concordance is based on 206Pb/238U age / 206Pb/207Pb age. Value is not reported for 206Pb/238U ages <400 Ma because of large uncertainty in 206Pb/207Pb age.
	5. Analyses with 206Pb/238U age >400 Ma and with >20% discordance (<80% concordance) are not included.
	6. Analyses with 206Pb/238U age >400 Ma and with >10% reverse discordance (<110% concordance) are not included.
	7. All uncertainties for individual analyses are reported at the 2-sigma level, and include only measurement uncertainties.
	8. U/Pb and 206Pb/207Pb fractionation is calibrated with individual crystals of FC-1 (primary referance material) and individual crystals of GHR1, R33, TEM, and fragments of SL-F (secondary reference materials).
	9. Systematic uncertainties have been determined as described by Gehrels and Pecha (2014) and Horstwood et al. (2016). These include contributions from (1) analysis of
		primary standards, (2) uncertainty in ages of the primary standard, (3) uncertainty in composition of common Pb, (4) uncertainty of the decay constants for 238U and 235U, and (5) long term variance of referance materials.
		Total systematic uncertainties and individual contributions are shown below (at 2-sigma level, in %).
								206/238								206/207
		Sample	Analysis #	Mode	Primary RM	ID-TIMS (206/238)	Decay constant (238)	Common Pb corr.	Ratio (206/238) Uncertainty RM	Long term	Total SE		ID-TIMS (206/207)	ID-TIMS (206/238)	Decay constant (238)	Common Pb corr.	Ratio (207/235) Uncertainty RM	Long term	Total SE
		72719PK2A	>200	Faraday	FC-1	0.033	0.053	4.3023e-06	0.0725	0.2	0.443415		0.069	0.033	0.053	0.0066	0.5086	0.2	1.10883
		72719PK2B	>200	Faraday	FC-1	0.033	0.053	2.7188e-06	0.0522	0.2	0.431846		0.069	0.033	0.053	0.0068	0.0319	0.2	0.445972
		72719PK2C	>200	Faraday	FC-1	0.033	0.053	2.005e-07	0.0493	0.2	0.430481		0.069	0.033	0.053	0.0097	0.0511	0.2	0.453274
		73019PK1	>200	Faraday	FC-1	0.033	0.053	2.9591e-07	0.0645	0.2	0.438444		0.069	0.033	0.053	0.0098	0.0318	0.2	0.446167
		73119PK1 (IAM)	<100	Faraday	SL-F	0.35	0.053	1.8314e-08	0.2811	0.2	0.988587		0.069	0.35	0.053	0.0174	0.5545	0.2	1.38252
		73119PK2	>200	Faraday	FC-1	0.033	0.053	2.431e-06	0.0594	0.2	0.435552		0.069	0.033	0.053	0.0094	0.0596	0.2	0.457382
		73119PK3	>200	Faraday	FC-1	0.033	0.053	1.0618e-06	0.0463	0.2	0.429147		0.069	0.033	0.053	0.0103	0.0418	0.2	0.449499
		73119PK4	>200	Faraday	FC-1	0.033	0.053	1.3488e-06	0.0626	0.2	0.437341		0.069	0.033	0.053	0.0081	0.047	0.2	0.45137
		8219PK2	> 200	Faraday	FC-1	0.033	0.053	2.2866e-06	0.0466	0.2	0.429276		0.069	0.033	0.053	0.0089	0.0481	0.2	0.451893
	10. Analyses conducted by LA-ICPMS, using analytical methods described by Gehrels et al. (2008), Gehrels and Pecha (2014), and Sundell et al. (2020), and data reporting protocols of Horstwood et al. (2016).
	11. U concentration and U/Th are calibrated relative to FC-1 zircon referance material and are accurate to ~20%.
	12. Common Pb correction is from measured 204Pb with common Pb composition interpreted from Stacey and Kramers (1975).
	13. Common Pb composition assigned uncertainties of 1.5 for 206Pb/204Pb, 0.3 for 207Pb/204Pb, and 2.0 for 208Pb/204Pb.
	14. U decay constants and composition as follows: 238U = 9.8485 x 10-10, 235U = 1.55125 x 10-10, 238U/235U = 137.88.
	15. U-Th disequilibrium correction is applied to 206/238 ages assuming a value of 2.3 for the magma.
	16. Weighted mean and KDE plots for rim analyses determined with IsoplotR (Vermeesch, 2018).
	17. Analyses rejeceted by IsoplotR are italicized
	Gehrels, G.E., Valencia, V., Ruiz, J., 2008, Enhanced precision, accuracy, efficiency, and spatial resolution of U-Pb ages by laser ablation-multicollector-inductively coupled plasma-mass spectrometry: Geochemistry, Geophysics, Geosystems, v. 9, Q03017, doi:10.1029/2007GC001805.
	Gehrels, G. and Pecha, M., 2014, Detrital zircon U-Pb geochronology and Hf isotope geochemistry of Paleozoic and Triassic passive margin strata of western North America: Geosphere, v. 10 (1), p. 49-65.
	Horstwood, M., Kosler, J., Gehrels, G., Jackson, S., McLean, N., Paton, C., Pearson, N., Sircombe, K., Sylvester, P., Vermeesch, P., Bowring, J., Condon, D., and Schoene, B., 2016, Community-Derived Standards for LA-ICP-MS U-Th-Pb Geochronology – Uncertainty Propagation, Age Interpretation and Data Reporting: Geostandards and Geoanalytical Research, v. 40 (3), p. 311-332. 10.1111/j.1751-908X.2016…
	Sundell, K. E., Gehrels, G. E., and Pecha, M. E., 2021, Rapid U‐Pb Geochronology by Laser Ablation Multi‐collector ICP‐MS: Geostandards and Geoanalytical Research, v. 45, no. 1, p. 37-57.
	Vermeesch, P., 2018, IsoplotR: A free and open toolbox for geochronology: Geoscience Frontiers, v. 9, no. 5, p. 1479-1493.
	Stacey, J.S., and Kramers, J.D., 1975, Approximation of terrestrial lead isotope evolution by a two stage model: Earth and Planetary Science Letters, v. 26, p. 207-221.

## Sheet: Table S2 (primary RMs)
U-Pb geochronologic analyses of primary reference materials
Analysis	202 (cps)	204 (cps)	206 (cps)	207 (cps)	208 (cps)	232 (cps)	238 (cps)	207Pb*	75 ± %	206Pb*	68 ± %	206Pb*	67 ± %	206Pb	64 ± %	208Pb*	82 ± %	208Pb*	82 ± %	206/238 age (Ma)	± (Ma)	206/207 age (Ma)	± (Ma)	208/232 age (Ma)	± (Ma)	rejection comments
								235U		238U		207Pb*		204Pb		232Th		232Th
72719PK2A
FC-1	8.82748	18.3368	2.94242e+06	220660	485106	1.10407e+06	1.73654e+07	1.81987	8.37821	0.185296	1.39749	14.0326	8.26083	80364.6	261.587	0.0595963	6.62515	0.439381	6.62059	1095.84	14.0834	964.974	168.773	1169.45	75.2782	rev discord
FC-1	40.3225	27.8585	3.21705e+06	247615	616245	1.55461e+06	1.88883e+07	1.8499	7.49786	0.186248	1.39829	13.8757	7.36632	67659.1	386.645	0.0537635	6.37223	0.396399	6.36535	1101.02	14.1525	987.857	149.962	1057.94	65.6798	rev discord
FC-1	29.3358	44.3383	5.93539e+06	448949	1.45761e+06	3.54919e+06	3.49414e+07	1.81489	6.29576	0.185768	1.38995	14.107	6.14041	103202	278.552	0.0557669	6.08874	0.410687	6.0873	1098.41	14.0375	954.135	125.57	1096.31	64.9727	rev discord
FC-1	69.9866	23.0977	2.14929e+06	161977	455723	1.0968e+06	1.26126e+07	1.9195	10.551	0.186317	1.37554	13.3776	10.461	42169.6	63.7585	0.0562937	6.41176	0.415502	6.41003	1101.39	13.9265	1061.86	210.605	1106.39	69.0315
FC-1	56.0014	15.5165	1.94432e+06	147074	331813	835389	1.138e+07	2.12936	13.0121	0.186815	1.35315	12.0914	12.9416	47804.8	1213.54	0.0537955	6.82314	0.397195	6.79315	1104.1	13.7307	1262.21	253.075	1058.55	70.367
FC-1	39.1552	13.8685	2.79065e+06	213429	530530	1.29828e+06	1.6327e+07	1.87467	9.85679	0.186894	1.3032	13.7399	9.77026	52566.6	253.112	0.0553843	6.32277	0.40864	6.31478	1104.53	13.2286	1007.83	198.295	1088.99	67.0315
FC-1	56.0283	1.04489	1.32478e+06	98572.8	160107	388313	7.75888e+06	2.20596	16.2039	0.18665	1.22788	11.6612	16.1573	28354.3	137.902	0.0555485	7.99443	0.412313	7.96681	1103.2	12.4503	1332.64	313.026	1092.13	84.9917
FC-1	48.1544	0.786187	3.19273e+06	240512	625291	1.50616e+06	1.86357e+07	1.84468	9.52963	0.187349	1.2687	13.9973	9.4448	72726.1	264.272	0.0563198	7.00615	0.415156	7.00238	1107	12.9048	970.106	192.8	1106.89	75.4642	rev discord
FC-1	40.0593	0.960384	2.11999e+06	166752	447359	1.08078e+06	1.24094e+07	2.05693	12.0373	0.186783	1.23846	12.515	11.9734	40736.2	2587.4	0.056072	7.10462	0.413923	7.07357	1103.93	12.5651	1194.61	236.412	1102.15	76.2059
FC-1	47.0176	8.65095	3.10723e+06	241362	616969	1.51947e+06	1.82765e+07	1.86428	8.67936	0.185917	1.1999	13.7443	8.59602	77179.7	92.073	0.0550917	6.82199	0.406041	6.82102	1099.22	12.1263	1007.19	174.454	1083.39	71.9619
FC-1	43.5501	7.82992	2.39824e+06	185149	480104	1.20708e+06	1.40947e+07	1.9386	9.25846	0.186054	1.32009	13.2271	9.16387	54495.3	211.818	0.053921	5.99357	0.397739	5.98736	1099.96	13.3492	1084.58	183.837	1060.96	61.9484
FC-1	24.1402	15.3374	1.70628e+06	133188	372271	905024	9.99703e+06	2.17862	13.2435	0.1866	1.325	11.8044	13.1771	36210.1	252.118	0.055704	6.37312	0.411338	6.36005	1102.93	13.4321	1308.99	255.99	1095.11	67.9347
FC-1	72.6723	8.42772	6.22267e+06	477480	1.54042e+06	3.69789e+06	3.65042e+07	1.84831	5.25656	0.186427	1.34444	13.901	5.08173	126665	72.6455	0.0565788	6.64703	0.416568	6.64686	1101.99	13.6185	984.171	103.461	1111.84	71.9075	rev discord
FC-1	69.0101	27.1048	1.79622e+06	136149	367083	887996	1.04094e+07	2.07543	11.6024	0.188647	1.34052	12.5272	11.5247	33469.9	339.544	0.0559468	7.09983	0.413383	7.07954	1114.04	13.7148	1192.69	227.605	1099.75	75.9935
FC-1	81.084	2.46814	2.45479e+06	188024	512375	1.25063e+06	1.43936e+07	1.91564	7.85594	0.186479	1.79151	13.4162	7.64894	48769.1	320.603	0.0555301	6.8218	0.409692	6.81263	1102.27	18.1513	1056.06	154.078	1091.78	72.5023
FC-1	63.6884	14.1871	3.10305e+06	240372	599619	1.43758e+06	1.81806e+07	1.86611	8.59652	0.186645	1.77433	13.7844	8.41142	72751.1	3633.45	0.0565823	7.08084	0.417103	7.06867	1103.17	17.9907	1001.27	170.861	1111.91	76.605	rev discord
FC-1	58.5803	2.3104	4.78781e+06	371974	1.061e+06	2.36413e+06	2.85413e+07	1.8409	6.18056	0.183454	1.33796	13.7344	6.034	100019	175.968	0.0609302	6.87906	0.448791	6.87799	1085.82	13.3701	1008.65	122.403	1194.87	79.8124
FC-1	74.328	2.49351	1.3154e+06	103163	204706	521133	7.70909e+06	2.28875	16.2085	0.186529	1.40532	11.2321	16.1475	29829.3	85.0265	0.0530477	7.87739	0.392811	7.86984	1102.55	14.2417	1404.8	309.764	1044.21	80.1671	discordant
FC-1	41.2687	15.6171	3.12781e+06	247565	540793	1.36222e+06	1.8252e+07	1.9127	9.578	0.187382	2.0724	13.5019	9.35111	53497.9	76828.5	0.0537926	6.61874	0.396995	6.58482	1107.18	21.0829	1043.18	188.754	1058.5	68.2555
FC-1	39.2544	11.7718	3.3461e+06	261925	628997	1.5346e+06	1.96614e+07	1.90854	9.76952	0.186112	2.05478	13.4396	9.55099	84689.4	202.87	0.0556166	6.9383	0.409878	6.93596	1100.28	20.7842	1052.55	192.569	1093.44	73.8494
FC-1	25.8377	10.4875	2.46725e+06	186962	503190	1.17959e+06	1.42917e+07	1.94415	8.96011	0.18877	1.18457	13.3818	8.88146	56022.9	220.592	0.0578385	7.18914	0.42658	7.18444	1114.71	12.1259	1061.22	178.754	1135.91	79.4091
FC-1	3.13206	1.88143	1.50052e+06	112990	213418	545418	8.79067e+06	2.07096	13.679	0.186619	1.19203	12.4193	13.627	36423.4	1347.62	0.0528797	7.51286	0.391293	7.44252	1103.03	12.0851	1209.74	268.537	1040.99	76.2273
FC-1	29.13	4.36576	2.9955e+06	232813	393418	954587	1.75689e+07	1.86883	7.54881	0.186438	1.05457	13.7491	7.47479	55761.7	2906.5	0.0557945	5.67239	0.412135	5.61788	1102.05	10.6827	1006.47	151.662	1096.84	60.5582
FC-1	28.7638	6.92928	5.48036e+06	420140	1.09339e+06	2.69564e+06	3.22447e+07	1.86355	5.98095	0.185877	1.06436	13.7466	5.88548	119594	1808.31	0.0550735	5.06758	0.405612	5.06233	1099	10.7545	1006.84	119.461	1083.04	53.4387
FC-1	49.6612	20.044	1.49268e+06	119562	245442	595626	8.60454e+06	2.31653	16.1324	0.189639	1.75968	11.2824	16.0361	29499.5	346.235	0.0556655	8.38809	0.412074	8.35231	1119.42	18.0828	1396.23	307.945	1094.37	89.355
FC-1	96.5377	21.1427	2.88849e+06	227260	669617	1.65345e+06	1.68971e+07	1.94839	10.3522	0.18692	1.6335	13.2218	10.2225	53308.2	17702.1	0.0549213	7.56938	0.404982	7.55312	1104.67	16.5833	1085.36	205.075	1080.12	79.6116
FC-1	35.493	1.41	2.38614e+06	178778	471021	1.17782e+06	1.39981e+07	1.90727	11.8948	0.186402	1.45589	13.4695	11.8054	64370.2	93.7205	0.0542372	6.49275	0.39991	6.49125	1101.85	14.7457	1048.07	238.206	1067.02	67.4812
FC-1	46.4797	2.14243	5.27768e+06	400013	1.00129e+06	2.47898e+06	3.10098e+07	1.82238	8.05335	0.186129	1.45295	14.0763	7.9212	111874	109.539	0.0548338	6.35081	0.403912	6.35012	1100.37	14.6977	958.589	161.917	1078.45	66.6943	rev discord
FC-1	43.424	9.03292	1.20605e+06	92476.9	171948	424601	7.12376e+06	2.35556	15.3768	0.185073	1.39969	10.8283	15.3129	29358.6	2550.03	0.0546485	8.25695	0.404963	8.14401	1094.63	14.0912	1474.58	290.935	1074.9	86.4343	discordant
FC-1	36.2828	17.2728	6.60746e+06	502246	1.70454e+06	4.05682e+06	3.89085e+07	1.82396	6.29918	0.185723	1.44282	14.0333	6.13171	124576	144.726	0.057069	6.79336	0.420167	6.79296	1098.16	14.5685	964.869	125.227	1121.21	74.0929	rev discord
FC-1	80.3744	7.72909	3.19286e+06	250177	536517	1.324e+06	1.87001e+07	1.98065	9.7761	0.186706	1.93658	12.9916	9.58236	63776.3	660.887	0.0549329	5.70819	0.405224	5.69199	1103.5	19.6413	1120.5	191.228	1080.35	60.0483
FC-1	21.2294	13.0392	698255	59905	73742.7	178563	4.11461e+06					8.82895	20.969	14316	372.437	0.0549934	30.104	0.412978	29.9968	1096.42	19.8002	1852.41	380.149	1081.5	317.021	high 6/7 err discordant
FC-1	33.9975	2.56073	2.09762e+06	157097	447269	1.0855e+06	1.23053e+07	1.91263	11.8611	0.18639	1.25735	13.4308	11.7942	50244.7	95.6201	0.0558567	6.24285	0.412039	6.24059	1101.79	12.7341	1053.86	237.773	1098.03	66.7189
FC-1	42.2376	2.74385	3.45313e+06	257475	685411	1.70982e+06	2.01786e+07	1.82114	8.11768	0.187139	1.27228	14.1622	8.01736	79025.9	473.111	0.0543923	6.02456	0.400867	6.01872	1105.86	12.929	946.172	164.193	1069.99	62.785	rev discord
FC-1	26.9174	3.80538	4.39937e+06	335657	551757	1.29489e+06	2.57331e+07	1.86676	8.41015	0.186961	1.21696	13.8031	8.32163	85569.1	211.009	0.0577635	6.24322	0.426103	6.2372	1104.89	12.3569	998.519	169.105	1134.48	68.8761	rev discord
FC-1	33.6924	4.53782	1.57296e+06	120169	215641	522180	9.28584e+06	2.04993	13.5347	0.185186	1.17553	12.4503	13.4835	32201.7	144678	0.0557498	7.92992	0.412964	7.80447	1095.24	11.8406	1204.82	265.878	1095.98	84.5954
FC-1	43.6948	9.98742	6.32684e+06	483398	1.59072e+06	3.73924e+06	3.71313e+07	1.8404	5.72772	0.186354	1.28835	13.9553	5.58094	173088	258.402	0.0577959	7.31961	0.425412	7.31923	1101.59	13.0459	976.245	113.735	1135.1	80.7939	rev discord
FC-1	73.9082	7.79012	3.14345e+06	241222	515604	1.45121e+06	1.77465e+07	1.94731	8.84103	0.193701	1.43069	13.7091	8.7245	74890.5	216.986	0.0481822	7.22667	0.355293	7.22258	1141.39	14.9658	1012.39	176.942	950.656	67.1094	rev discord
FC-1	64.3255	2.47925	1.57378e+06	124462	295127	717161	9.21707e+06	2.16215	13.1054	0.18669	1.51027	11.9	13.0181	43646.8	305.172	0.0557364	6.57587	0.411521	6.56188	1103.42	15.3164	1293.32	253.491	1095.73	70.1345
FC-1	57.1841	13.6489	3.45115e+06	264315	681907	1.68723e+06	2.01581e+07	1.89873	8.18117	0.18721	1.52144	13.5887	8.03845	60590.5	132.304	0.0548051	5.11442	0.404158	5.1109	1106.24	15.4658	1030.24	162.564	1077.9	53.6834
FC-1	24.2202	4.42345	3.10474e+06	233147	504525	1.23597e+06	1.83319e+07	1.79521	8.31941	0.185208	1.4188	14.2186	8.19753	76784.8	247.999	0.0553592	5.25115	0.408201	5.24497	1095.36	14.2923	937.993	168.121	1088.51	55.6467	rev discord
FC-1	62.1242	14.4944	2.0683e+06	158701	441318	1.08813e+06	1.2209e+07	2.05939	11.5603	0.185233	1.43334	12.3963	11.4711	48365.7	261.107	0.0549742	5.45646	0.405574	5.44725	1095.5	14.4405	1213.42	225.84	1081.14	57.4411
FC-1	39.9603	6.38795	1.98083e+06	149720	422536	1.0198e+06	1.16557e+07	1.98725	10.3596	0.185802	1.35014	12.8858	10.2713	38068.4	530.799	0.0561151	5.1381	0.41433	5.1107	1098.59	13.6375	1136.8	204.516	1102.97	55.1527
FC-1	79.5122	16.1344	2.97067e+06	226995	590437	1.45834e+06	1.75132e+07	1.88071	10.3566	0.185475	1.35369	13.5918	10.2677	52772.9	104.537	0.0548814	5.12101	0.40487	5.11774	1096.82	13.6531	1029.78	207.71	1079.36	53.8235
FC-1	55.5437	4.31576	1.39773e+06	107129	275166	693695	8.20638e+06	2.26448	15.9293	0.186188	1.32223	11.3317	15.8743	28805.2	261.836	0.0536339	5.6849	0.396667	5.65423	1100.69	13.379	1387.87	305.188	1055.45	58.4612	discordant
FC-1	80.2638	7.24549	2.14125e+06	164655	409103	1.03389e+06	1.25357e+07	1.9304	10.5961	0.18677	1.34911	13.3344	10.5098	50786.1	106.011	0.0536248	4.81698	0.395695	4.81282	1103.86	13.687	1068.36	211.382	1055.28	49.5279
FC-1	61.9603	3.10421	1.60746e+06	125646	241026	601373	9.34447e+06	2.22075	13.7821	0.188078	1.21031	11.6721	13.7289	39654.6	682.107	0.0542057	7.05365	0.400793	7.00918	1110.95	12.3512	1330.82	265.945	1066.42	73.2704
FC-1	34.3105	19.0519	2.69227e+06	209055	531150	1.31706e+06	1.58353e+07	1.93155	10.2842	0.185904	1.28745	13.2646	10.2033	52789.1	98.6451	0.0546654	5.6688	0.403285	5.66602	1099.15	13.0103	1078.89	204.926	1075.22	59.3587
FC-1	44.6716	4.12677	6.27194e+06	478698	1.42043e+06	3.44859e+06	3.70085e+07	1.82757	6.42986	0.185342	1.17019	13.977	6.32248	118642	518.636	0.0559335	5.68504	0.411886	5.68285	1096.09	11.7952	973.083	128.96	1099.5	60.8365	rev discord
FC-1	55.292	10.5356	2.41742e+06	183918	450169	1.07225e+06	1.41546e+07	1.92422	9.7753	0.186746	1.13084	13.3755	9.70967	52985.5	129.387	0.0568994	6.06878	0.419835	6.06462	1103.72	11.4713	1062.17	195.413	1117.97	66.004
FC-1	5.17676	9.0316	3.20956e+06	247301	507395	1.09432e+06	1.90274e+07	1.88473	7.96997	0.184472	1.34992	13.4894	7.85481	98047.9	145.913	0.062911	6.15331	0.463661	6.15142	1091.36	13.5528	1045.09	158.496	1232.55	73.5757
FC-1	39.6856	5.73563	3.0858e+06	235969	586722	1.45895e+06	1.81618e+07	1.86512	8.11496	0.185792	1.39515	13.7288	7.99413	62395	178.849	0.0545319	5.84825	0.402153	5.84377	1098.54	14.0916	1009.47	162.163	1072.67	61.0959
FC-1	71.9779	1.35815	4.95689e+06	383880	936382	2.26004e+06	2.92924e+07	1.85173	6.06621	0.185067	1.51031	13.7742	5.8752	120420	116.133	0.0562525	4.64605	0.414322	4.64516	1094.6	15.2044	1002.78	119.313	1105.6	49.9865
FC-1	53.4837	0.839164	2.56611e+06	200445	518533	1.25566e+06	1.51057e+07	1.86904	9.69617	0.185734	1.59214	13.6957	9.56456	41234	1670.96	0.0559344	4.42574	0.412955	4.37719	1098.23	16.077	1014.36	193.884	1099.52	47.3612
FC-1	61.3384	38.3352	4.65209e+06	353597	960351	2.44629e+06	2.74235e+07	1.82009	6.56262	0.185509	1.32236	14.047	6.42801	77054.8	113.403	0.0532685	5.32346	0.392574	5.32194	1097	13.3391	962.879	131.318	1048.45	54.3901	rev discord
FC-1	26.7304	15.6297	3.21146e+06	245003	617626	1.52613e+06	1.89455e+07	1.82468	7.90168	0.185363	1.30391	14.0006	7.79335	65983.8	176.764	0.0548869	5.19823	0.404702	5.19393	1096.21	13.1443	969.616	159.065	1079.47	54.6404	rev discord
FC-1	41.902	17.2512	2.92727e+06	229362	596078	1.42644e+06	1.62521e+07	2.05243	8.81576	0.196952	1.67151	13.2253	8.65584	57220.5	230.122	0.0566621	4.53381	0.417879	4.52629	1158.93	17.7301	1084.86	173.666	1113.43	49.1151
FC-1	27.4361	18.8992	4.93588e+06	382684	892488	1.87379e+06	2.9015e+07	1.86356	8.9482	0.186045	1.31061	13.759	8.8517	118522	75.4752	0.0646619	5.82629	0.4763	5.82587	1099.91	13.2528	1005.02	179.673	1265.8	71.4866
FC-1	66.847	1.18752	1.09067e+06	81692.1	143929	361819	6.43992e+06	2.30364	17.5492	0.185124	1.52562	11.0754	17.4828	25217.8	1284.52	0.0535773	7.24978	0.397792	7.07191	1094.91	15.3625	1431.65	334.22	1054.37	74.4791	discordant
FC-1	72.1573	3.75641	2.91604e+06	222007	502919	1.263e+06	1.71431e+07	1.86175	8.58144	0.186005	1.46286	13.7694	8.45584	62613.7	384.15	0.0539812	5.32366	0.398195	5.31181	1099.7	14.7897	1003.48	171.667	1062.11	55.0827
FC-1	48.2879	2.05451	1.99404e+06	150530	225018	552195	1.17637e+07	1.99134	10.8744	0.185343	1.45168	12.8275	10.777	47290.4	240.775	0.0550792	5.33005	0.407498	5.29889	1096.1	14.6325	1145.81	214.291	1083.15	56.2119
FC-1	52.1332	19.6329	708125	49309.7	72761.2	179843	4.18405e+06					10.6789	20.1499	14213.7	308.943	0.0538353	22.2779	0.404581	22.1594	1093.69	15.5014	1500.9	381.903	1059.32	229.915	high 6/7 err discordant
FC-1	76.9448	2.57318	2.9313e+06	225485	478505	1.19607e+06	1.72222e+07	1.91137	11.3115	0.186126	1.44727	13.4207	11.2185	71808	106.916	0.0542467	5.93729	0.400063	5.93499	1100.35	14.6401	1055.39	226.137	1067.2	61.7183
FC-1	68.3385	6.03293	2.74305e+06	212255	444736	1.03441e+06	1.62097e+07	1.92426	9.78245	0.185051	1.39475	13.2538	9.68251	69015	153.904	0.0582906	5.67995	0.429941	5.67577	1094.51	14.04	1080.53	194.369	1144.55	63.2024
FC-1	61.7847	8.06759	4.83797e+06	368672	908728	2.07795e+06	2.85424e+07	1.82459	7.3396	0.18537	1.41233	14.0019	7.20243	104933	240.062	0.0593625	6.45847	0.43732	6.45652	1096.25	14.2377	969.426	146.962	1165	73.1126	rev discord
FC-1	52.2629	11.7081	1.10371e+06	82172.1	135008	331440	6.52897e+06	2.1471	15.7968	0.184756	1.4632	11.8593	15.7289	20854.9	89.8911	0.0547057	7.39072	0.407339	7.36151	1092.9	14.7093	1299.98	306.117	1076	77.4433
FC-1	32.1513	6.74198	3.63688e+06	277214	432293	1.04975e+06	2.14225e+07	1.84917	8.77182	0.185655	1.49939	13.837	8.64272	78707.6	200.869	0.0558014	6.06315	0.411805	6.05542	1097.79	15.1349	993.547	175.808	1096.97	64.7376	rev discord
FC-1	42.0392	14.7988	3.36889e+06	259245	669791	1.63004e+06	1.97907e+07	1.87369	9.14838	0.186155	1.52045	13.6927	9.02114	84970.9	231.922	0.0557623	6.22187	0.410906	6.21918	1100.51	15.3824	1014.81	182.88	1096.22	66.3882
FC-1	50.4014	15.7527	1.71431e+06	134751	280014	666162	9.99532e+06	2.17253	12.2907	0.187538	2.14714	11.897	12.1017	52253.9	136.732	0.0569396	6.38559	0.420339	6.38007	1108.03	21.8585	1293.81	235.56	1118.74	69.4961
FC-1	32.6396	6.59727	3.23431e+06	244976	618946	1.51855e+06	1.90923e+07	1.83882	10.4978	0.185257	2.1742	13.885	10.2702	85213.8	666.678	0.0553086	5.82673	0.407589	5.81986	1095.63	21.9068	986.529	209.095	1087.54	61.6926	rev discord
FC-1	41.8794	16.5256	3.02487e+06	233049	590910	1.45962e+06	1.74967e+07	1.90402	11.9493	0.189041	3.35823	13.6834	11.4677	56475.9	26443.1	0.0548854	4.48761	0.404839	4.45282	1116.18	34.4182	1016.18	232.498	1079.44	47.1695
FC-1	44.2595	14.3282	6.16107e+06	475987	830729	2.02485e+06	3.58122e+07	1.87851	5.76242	0.188153	1.25053	13.8042	5.62509	142237	146.039	0.0556878	4.37783	0.410267	4.37606	1111.36	12.766	998.353	114.286	1094.8	46.6529	rev discord
FC-1	41.0778	3.75449	996186	73464.1	148945	369548	5.82348e+06					10.1476	17.2466	20013.6	518.459	0.0542281	7.15793	0.403047	7.0095	1104.84	16.093	1596.76	322.553	1066.85	74.3828	discordant
FC-1	6.28689	0.823229	3.76677e+06	288862	748636	1.8268e+06	2.22478e+07	1.85506	8.99984	0.185157	1.56808	13.756	8.86218	91675.5	156.89	0.0556207	5.34181	0.409808	5.34007	1095.08	15.7925	1005.46	179.87	1093.51	56.8607
FC-1	56.0854	6.43314	6.07602e+06	465884	1.33027e+06	3.27468e+06	3.58072e+07	1.83874	6.5918	0.185579	1.72818	13.9098	6.36122	136394	93.7685	0.0551717	5.85143	0.406229	5.85112	1097.38	17.4384	982.894	129.554	1084.92	61.8088	rev discord
FC-1	27.7032	12.4757	4.77551e+06	367934	1.16251e+06	2.83469e+06	2.8095e+07	1.84921	8.06758	0.185883	1.68186	13.8537	7.89032	86502.2	210.533	0.0556734	5.63923	0.410101	5.63753	1099.03	16.9944	991.126	160.555	1094.52	60.0805	rev discord
FC-1	82.5756	17.6006	1.09013e+06	80348.5	214714	558546	6.42263e+06	2.30842	20.9615	0.185518	1.69797	11.076	20.8926	23351.4	160.811	0.0519107	7.62295	0.384416	7.60304	1097.05	17.1287	1431.55	399.752	1022.39	75.9969	high 6/7 err discordant
FC-1	63.7151	5.14921	2.1437e+06	164868	456496	1.11885e+06	1.2616e+07	2.02217	10.1528	0.185798	1.65767	12.6629	10.0165	53205.4	665.595	0.0553186	6.96405	0.408005	6.95198	1098.57	16.7435	1171.42	198.367	1087.73	73.7471
FC-1	41.8105	12.0158	1.31678e+06	106398	240465	600261	7.75318e+06					10.5148	15.5297	35124	282.472	0.0542002	7.89815	0.4006	7.88078	1097.92	14.1946	1530.12	292.888	1066.31	82.0349	discordant
FC-1	40.1625	14.5793	2.19865e+06	175420	463527	1.14992e+06	1.29488e+07	2.05629	10.9923	0.185654	1.33342	12.4432	10.9111	46226.7	227.472	0.0546282	7.72972	0.403093	7.7235	1097.79	13.4596	1205.95	215.029	1074.51	80.8866
FC-1	13.0543	6.2805	6.95152e+06	531404	1.74086e+06	4.24282e+06	4.08633e+07	1.83799	6.32773	0.18605	1.39075	13.9508	6.173	146193	47.2958	0.0557365	6.30572	0.410309	6.30565	1099.94	14.0635	976.9	125.796	1095.73	67.2533	rev discord
FC-1	19.8294	7.74537	2.20108e+06	166828	352781	862212	1.2972e+07	1.85921	10.1305	0.185536	1.34845	13.7535	10.0404	52870.9	412.085	0.0554236	6.40836	0.409159	6.39063	1097.15	13.604	1005.83	203.844	1089.74	67.9845
FC-1	51.2712	24.2181	5.94952e+06	456058	1.45625e+06	3.54432e+06	3.50301e+07	1.8395	6.56505	0.185743	1.47359	13.9164	6.39753	119446	61.8311	0.0558004	8.07117	0.410867	8.07105	1098.27	14.8805	981.933	130.314	1096.95	86.1762	rev discord
FC-1	36.6222	33.9229	6.8357e+06	520116	1.8055e+06	4.46109e+06	4.01168e+07	1.83156	6.74009	0.186347	1.46891	14.0221	6.57808	109464	145.256	0.054965	7.94723	0.404721	7.94681	1101.55	14.8739	966.487	134.311	1080.96	83.6487	rev discord
FC-1	33.742	3.88149	3.39771e+06	260435	656181	1.56842e+06	1.99379e+07	1.9426	9.49256	0.186364	1.05837	13.2218	9.43337	91420.3	567.346	0.0567797	6.94719	0.41837	6.94272	1101.65	10.7177	1085.36	189.263	1115.68	75.4073
FC-1	80.9847	19.9226	7.72599e+06	593978	1.39503e+06	3.59287e+06	4.50407e+07	1.86388	5.78923	0.1876	1.00378	13.8717	5.70154	144711	351.153	0.0527259	6.58133	0.388278	6.5798	1108.36	10.2216	988.466	116.053	1038.04	66.5912	rev discord
FC-1	59.8278	3.45371	1.37325e+06	99992.4	210900	518271	8.0886e+06	2.15155	13.1751	0.185592	1.44069	11.8883	13.0961	28627.1	8469.34	0.0549338	8.4237	0.406931	8.31065	1097.45	14.5383	1295.23	254.907	1080.36	88.6161
FC-1	25.9521	1.25642	4.69215e+06	353456	451158	1.08891e+06	2.74972e+07	1.83917	7.10088	0.186616	1.41152	13.9842	6.95918	95709.6	111.509	0.0561395	8.05893	0.414322	8.05583	1103.02	14.3102	971.982	141.975	1103.44	86.5406	rev discord
FC-1	80.0806	15.408	1.91055e+06	145242	214193	530041	1.12021e+07	1.88415	9.19357	0.186475	1.137	13.6401	9.12299	41249	329.197	0.0545718	7.12674	0.404107	7.08473	1102.25	11.5197	1022.61	184.728	1073.43	74.5038
FC-1	80.4468	5.88637	3.51256e+06	267961	672396	1.62881e+06	2.05671e+07	1.86774	7.73529	0.186767	1.12398	13.7815	7.65319	84255.5	78.2961	0.0560165	6.02155	0.412815	6.02076	1103.84	11.4028	1001.7	155.463	1101.09	64.5281	rev discord
FC-1	59.5684	1.53514	1.07613e+06	78255.6	130405	316708	6.3272e+06	2.33976	16.5226	0.185898	1.9599	10.95	16.406	23104.3	113.429	0.0553591	8.78057	0.411752	8.75123	1099.12	19.8053	1453.35	312.667	1088.51	93.0481	discordant
FC-1	46.0181	6.33853	2.22705e+06	171518	435780	1.07022e+06	1.31863e+07	1.90981	10.3944	0.184676	1.71118	13.327	10.2526	54996.5	378.85	0.0551994	7.51614	0.407185	7.50772	1092.47	17.1959	1069.48	206.202	1085.45	79.431
FC-1	29.252	29.6154	3.31478e+06	253007	655273	1.64137e+06	1.95809e+07	1.87372	9.71058	0.185121	1.2079	13.6165	9.63516	71366.4	2136.12	0.0541572	7.04276	0.399223	7.03162	1094.89	12.1631	1026.11	195.008	1065.49	73.0952
FC-1	39.6892	23.5728	2.83753e+06	219305	466512	1.15264e+06	1.67469e+07	1.95146	10.2628	0.18528	1.24236	13.0852	10.1873	63866.2	124.208	0.0548628	8.13076	0.404732	8.12813	1095.76	12.5191	1106.15	203.762	1079.01	85.4297
FC-1	31.1517	6.30562	2.04844e+06	155896	434177	1.0551e+06	1.203e+07	1.95571	12.0644	0.186186	1.28644	13.1207	11.9956	50681.5	369.681	0.0557846	7.24518	0.411504	7.23644	1100.68	13.0167	1100.72	240.116	1096.65	77.3364
FC-1	42.3215	11.6158	1.55951e+06	116103	190969	381022	9.28982e+06	2.11305	15.4119	0.183523	1.29705	11.97	15.3572	31666.6	490.202	0.0675953	9.34952	0.501202	9.28873	1086.19	12.9655	1281.9	299.606	1321.39	119.59
FC-1	30.3774	2.28582	5.57903e+06	422738	1.30786e+06	3.13332e+06	3.31398e+07	1.80249	6.41939	0.184114	1.12827	14.0775	6.31946	125861	156.701	0.0566889	6.89151	0.417405	6.89099	1089.41	11.309	958.414	129.151	1113.95	74.6896	rev discord
FC-1	31.8423	10.3426	719971	53132.8	76674.9	174295	4.25649e+06					7.56763	25.6068	15806.9	209.553	0.0587052	13.1653	0.439914	13.0448	1093.23	12.9304	2126.6	450.34	1152.46	147.479	high 6/7 err discordant
FC-1	10.7539	10.3883	1.34881e+06	106135	294771	696641	8.02227e+06	2.2234	17.0116	0.183792	1.27091	11.3925	16.9641	27903.3	280.984	0.0572341	7.05976	0.423132	7.03772	1087.66	12.7199	1377.59	326.666	1124.37	77.2091	discordant
FC-1	24.6704	13.135	6.06536e+06	469304	1.50427e+06	3.53903e+06	3.58121e+07	1.85135	6.28441	0.185223	1.26429	13.7885	6.15592	110110	113.71	0.0577227	6.08236	0.425053	6.08191	1095.44	12.7368	1000.67	125.07	1133.7	67.0566
FC-1	20.8328	6.36779	776691	58518.3	79510.3	203292	4.57224e+06					8.28231	24.1676	16545.8	388.023	0.0521992	12.4497	0.391113	12.2416	1097.59	13.5466	1967.16	432.616	1027.93	124.773	high 6/7 err discordant
FC-1	34.5661	7.73157	1.04272e+06	77159.4	207119	499141	6.06107e+06					10.2169	16.476	22635.2	140.801	0.0560254	10.3905	0.41495	10.3773	1110.7	13.8339	1584.04	308.599	1101.26	111.364	discordant
FC-1	33.227	5.51076	2.21827e+06	170298	472548	1.11399e+06	1.31049e+07	2.03764	11.1597	0.185087	1.57306	12.5187	11.0483	51686.4	153.068	0.057509	6.83834	0.424195	6.83471	1094.7	15.8375	1194.03	218.114	1129.62	75.1274
FC-1	49.524	11.004	2.54817e+06	191665	518672	1.26081e+06	1.50338e+07	1.85299	9.66219	0.185337	1.62184	13.7848	9.5251	55159.7	201.683	0.0557748	6.60738	0.411381	6.60244	1096.06	16.3473	1001.21	193.508	1096.46	70.5166
FC-1	39.7809	18.6387	1.88502e+06	145129	326955	807796	1.11374e+07	1.93525	12.3511	0.185051	1.43334	13.1785	12.2677	40945.7	712.32	0.0547873	6.276	0.404749	6.24098	1094.51	14.4285	1091.92	245.968	1077.56	65.8557
FC-1	65.2333	0.877129	3.19927e+06	245260	609946	1.62918e+06	1.85914e+07	1.88695	9.40232	0.188184	1.64412	13.7447	9.25746	79990.4	208.704	0.0507968	6.7342	0.374389	6.73144	1111.53	16.7861	1007.12	187.892	1000.98	65.7656	rev discord
FC-1	35.886	2.99782	2.70184e+06	208053	531803	1.27826e+06	1.58875e+07	1.92957	10.881	0.185954	1.28809	13.2819	10.8045	54486.3	52.1033	0.0563987	7.51561	0.416036	7.51487	1099.42	13.0197	1076.29	217.084	1108.4	81.0589
FC-1	73.2407	0.481238	3.07553e+06	234568	496140	1.52024e+06	1.6992e+07	2.00804	9.85487	0.197932	1.50271	13.5849	9.73962	77935.9	108.342	0.0442607	7.92116	0.326355	7.91962	1164.2	16.0058	1030.81	196.962	874.932	67.8255	rev discord
FC-1	35.1194	24.4478	3.41745e+06	263262	812929	1.96763e+06	2.0196e+07	1.84006	8.0374	0.185044	1.34025	13.8597	7.92487	76176	929.909	0.056074	7.33852	0.413151	7.33343	1094.47	13.491	990.234	161.278	1102.19	78.7175	rev discord
FC-1	21.0196	13.8275	2.07868e+06	160683	443315	1.05309e+06	1.2273e+07	1.99073	10.4718	0.185164	1.54426	12.819	10.3573	33919.3	45.0292	0.0569871	8.11945	0.420967	8.11825	1095.12	15.5531	1147.09	205.874	1119.65	88.436
FC-1	31.8729	7.46353	1.15623e+06	86183.9	192973	500520	6.81665e+06	2.15943	15.2389	0.185407	1.49944	11.8331	15.165	25885.3	4067.73	0.0520403	8.54434	0.385545	8.43557	1096.44	15.1184	1304.27	294.949	1024.88	85.3849
FC-1	28.5769	2.70271	2.38174e+06	181072	480709	1.17188e+06	1.41916e+07	1.87957	9.81088	0.183515	1.30614	13.4563	9.72355	57254.6	2179.59	0.0556195	7.5094	0.410203	7.49378	1086.15	13.0559	1050.04	196.088	1093.49	79.9319
FC-1	44.4541	2.29124	5.29499e+06	399094	1.23762e+06	2.88561e+06	3.13129e+07	1.80107	6.6384	0.184936	1.27724	14.1515	6.51437	131922	202.848	0.0582519	6.81439	0.428894	6.81375	1093.88	12.8504	947.689	133.396	1143.81	75.7781	rev discord
FC-1	35.4816	0.638502	2.28166e+06	173454	397823	996954	1.3402e+07	1.91315	12.1401	0.186167	1.23031	13.4112	12.0776	62470.5	83.0876	0.054097	6.77104	0.399039	6.76941	1100.58	12.4477	1056.81	243.427	1064.33	70.201
FC-1	68.1937	20.4116	1.84066e+06	142352	406073	1.04259e+06	1.0814e+07	2.11425	12.8079	0.186098	1.62618	12.1311	12.7043	41320.8	1191.92	0.0527724	7.40174	0.389486	7.37993	1100.2	16.4478	1255.84	248.691	1038.93	74.9552
FC-1	29.9235	24.2569	976755	77268.8	120027	282123	5.8202e+06	2.27431	13.7381	0.183417	1.62731	11.1148	13.6413	21050.6	327.645	0.0571463	11.6692	0.425441	11.5848	1085.61	16.2588	1424.87	260.85	1122.69	127.436	discordant
FC-1	69.6509	7.68252	3.41861e+06	266309	648042	1.58066e+06	2.01762e+07	1.88653	8.65074	0.18528	1.37331	13.5356	8.54104	62936.5	94.4393	0.0555944	8.19032	0.409983	8.18895	1095.76	13.8387	1038.15	172.524	1093.01	87.1425
FC-1	77.3416	1.09061	5.31733e+06	409912	873424	2.07679e+06	3.13148e+07	1.84947	6.30225	0.185703	1.31426	13.8383	6.16369	116077	500.633	0.057085	7.99966	0.420565	7.9966	1098.05	13.2691	993.364	125.367	1121.52	87.2728	rev discord
FC-1	2.22024	2.6235	1.35774e+06	104885	205913	493103	8.04377e+06	2.05587	10.2033	0.184547	1.64328	12.3715	10.0701	38457.3	8122.26	0.0564708	6.57725	0.417586	6.49518	1091.77	16.5038	1217.32	198.106	1109.78	71.0242
FC-1	11.3301	22.2161	7.68024e+06	585227	1.86504e+06	4.58854e+06	4.52709e+07	1.82691	6.12258	0.185539	1.79042	13.9968	5.85494	137520	13494.8	0.0552086	5.87099	0.406456	5.86814	1097.17	18.0632	970.153	119.472	1085.63	62.0548	rev discord
FC-1	27.6498	8.6763	2.61641e+06	198478	574987	1.39573e+06	1.5193e+07	1.89147	9.41036	0.188305	1.32358	13.7206	9.31681	54788.7	11839.2	0.0558642	6.70262	0.411961	6.68356	1112.18	13.5207	1010.69	188.996	1098.17	71.6416	rev discord
FC-1	22.8889	19.1135	1.86399e+06	137006	338689	852836	1.08862e+07	1.90807	10.2618	0.187206	1.34554	13.5219	10.1732	39832.5	147.192	0.0537609	7.12914	0.397133	7.12112	1106.22	13.6776	1040.19	205.471	1057.89	73.478
FC-1	12.1768	14.9597	3.04709e+06	239903	537287	1.36275e+06	1.79943e+07	1.90785	9.68821	0.185167	1.52059	13.3762	9.56814	59803.2	1319.22	0.0534449	8.25716	0.394266	8.24211	1095.14	15.315	1062.07	192.604	1051.83	84.6293
FC-1	60.5182	13.3117	3.24709e+06	250295	381665	922391	1.91157e+07	1.84811	7.78749	0.185756	1.26025	13.8525	7.68484	73010.2	530.365	0.0560519	8.40637	0.413778	8.39115	1098.34	12.7269	991.28	156.328	1101.76	90.1383	rev discord
FC-1	75.5981	13.7225	1.93956e+06	147914	416741	1.01846e+06	1.14567e+07	2.07548	13.3836	0.185098	1.36334	12.2913	13.314	41276.9	98.062	0.0554365	7.53088	0.409187	7.5281	1094.77	13.7268	1230.14	261.571	1089.99	79.9106
FC-1	70.6541	26.9063	3.30902e+06	253894	632315	1.51939e+06	1.95914e+07	1.89811	10.2615	0.184703	1.80959	13.4111	10.1007	76266.6	602.573	0.0564593	7.0465	0.416164	7.03991	1092.62	18.187	1056.82	203.496	1109.56	76.0767
FC-1	50.0085	3.70724	6.13868e+06	469583	1.33378e+06	3.35169e+06	3.62932e+07	1.8283	6.25873	0.184981	1.76402	13.9441	6.00499	126315	398.031	0.0540414	6.9803	0.397943	6.97885	1094.13	17.7516	977.858	122.354	1063.27	72.3	rev discord
FC-1	2.7276	3.89035	4.57894e+06	348321	860563	2.02314e+06	2.70321e+07	1.81975	8.57905	0.185244	1.76935	14.0296	8.39461	93433.7	340.824	0.0577278	6.87443	0.42536	6.87122	1095.56	17.8266	965.417	171.497	1133.8	75.7955	rev discord
FC-1	74.305	11.2516	5.94485e+06	455573	1.27151e+06	3.03296e+06	3.51663e+07	1.83051	6.36785	0.18488	1.53865	13.9197	6.17916	122613	262.889	0.0569294	7.29477	0.419231	7.29369	1093.58	15.4766	981.448	125.871	1118.54	79.3775	rev discord
FC-1	43.7254	2.46237	5.82576e+06	445198	1.21708e+06	2.89008e+06	3.45099e+07	1.82313	5.98747	0.184625	1.32634	13.9568	5.83872	135793	156.647	0.0571913	7.38952	0.421122	7.389	1092.19	13.3255	976.031	118.995	1123.55	80.7584	rev discord
FC-1	28.6683	13.7605	3.26702e+06	254098	631262	1.50069e+06	1.93194e+07	1.85701	7.90645	0.184929	1.46208	13.7247	7.77009	82349.4	435.158	0.0570778	6.92869	0.420647	6.92411	1093.85	14.7097	1010.08	157.592	1121.38	75.5799
FC-1	58.6986	25.4794	3.41704e+06	263464	636085	1.67473e+06	1.97708e+07	1.90749	8.79186	0.188994	1.62988	13.6552	8.63947	64105.4	14623.7	0.0515034	7.40412	0.379813	7.38641	1115.92	16.7009	1020.37	174.98	1014.57	73.2646
FC-1	46.6018	11.8096	2.00605e+06	150945	357998	905441	1.15413e+07	2.0562	9.81416	0.190044	2.11629	12.738	9.58327	43735.9	116.434	0.0535413	7.75416	0.395385	7.74978	1121.61	21.7863	1159.67	190.135	1053.68	79.6099
FC-1	73.5191	15.2887	2.54755e+06	193023	504115	1.23542e+06	1.50296e+07	2.05086	11.1302	0.185348	1.23517	12.4556	11.0615	60157.6	1153.69	0.0553323	7.67287	0.408052	7.66063	1096.13	12.4505	1203.99	218.097	1087.99	81.2723
FC-1	31.3921	4.32194	3.26355e+06	247075	650713	1.58572e+06	1.9345e+07	1.8581	8.81714	0.184485	1.62564	13.6837	8.66598	76831.1	129.763	0.0556773	6.11664	0.410358	6.11494	1091.43	16.3221	1016.14	175.657	1094.6	65.1711
FC-1	33.4063	6.29836	923781	69536.7	106946	267749	5.44064e+06					10.1035	22.0283	23374.6	215.941	0.0536812	9.56934	0.399427	9.51098	1097.42	16.6009	1604.88	412.039	1056.36	98.4897	high 6/7 err discordant
FC-1	76.5711	12.7827	5.09522e+06	392095	1.10474e+06	2.56644e+06	2.99761e+07	1.84758	6.66818	0.185888	1.823	13.8663	6.41415	100399	75.2005	0.0584394	7.99041	0.430456	7.99011	1099.06	18.421	989.233	130.505	1147.39	89.126	rev discord
FC-1	17.4261	9.30365	5.25184e+06	404547	1.00786e+06	2.38624e+06	3.0852e+07	1.87555	6.94784	0.186165	1.6455	13.6799	6.75018	111435	469.907	0.0573397	7.64184	0.422366	7.63938	1100.57	16.6483	1016.71	136.762	1126.38	83.7208
FC-1	15.8543	3.98719	1.14024e+06	88568.2	154018	354573	6.73415e+06	2.27853	14.9783	0.185083	1.50255	11.195	14.9028	25535.3	149.37	0.0585241	8.25999	0.434376	8.22969	1094.68	15.1274	1411.14	285.556	1149	92.2591	discordant
FC-1	62.3646	3.43786	1.62761e+06	126276	261953	662581	9.61648e+06	2.30491	13.1508	0.185043	1.32486	11.0645	13.0839	36494.5	129.785	0.0534661	7.56267	0.395352	7.55357	1094.46	13.336	1433.54	249.871	1052.24	77.5405	discordant
FC-1	45.5679	3.9941	2.251e+06	173444	384786	905310	1.33846e+07	2.03036	13.4373	0.183886	1.65739	12.4821	13.3347	46373.4	219.364	0.057559	6.36601	0.425032	6.35495	1088.17	16.5952	1199.83	263.127	1130.57	69.9957
FC-1	86.0356	1.06437	3.53291e+06	273697	714886	1.93476e+06	2.06513e+07	1.8707	9.41673	0.187077	1.59908	13.7825	9.27996	73962.6	144.8	0.0501307	6.36119	0.369495	6.35924	1105.52	16.2454	1001.55	188.535	988.175	61.3471	rev discord
FC-1	48.9747	3.4977	2.11897e+06	163066	417234	1.03543e+06	1.23261e+07	1.97699	11.0816	0.187962	1.57966	13.1032	10.9685	44751.4	167.195	0.0545914	6.67284	0.402958	6.66635	1110.32	16.112	1103.38	219.469	1073.81	69.7825
FC-1	10.7044	6.39016	1.67372e+06	129777	275014	716621	9.98076e+06	1.99332	12.4341	0.18334	1.43418	12.6763	12.3511	36768.8	172.074	0.0519067	7.06032	0.383765	7.04689	1085.19	14.3242	1169.29	244.76	1022.31	70.3827
FC-1	19.7301	6.42979	2.2104e+06	171441	465579	1.09776e+06	1.30364e+07	1.97833	12.0836	0.185401	1.39329	12.9159	12.003	54079.9	139.569	0.0575038	7.07435	0.424116	7.07137	1096.41	14.0478	1132.15	239.188	1129.52	77.7135
FC-1	51.5914	7.16223	2.61213e+06	202679	569682	1.4438e+06	1.44854e+07	2.12261	8.52697	0.197183	1.51401	12.803	8.39148	57667.2	1009.09	0.0535123	7.38965	0.394572	7.37875	1160.17	16.0752	1149.59	166.718	1053.12	75.8287
FC-1	31.888	12.4602	2.29778e+06	180955	485340	1.2051e+06	1.34017e+07	2.00237	10.53	0.187468	2.05425	12.9031	10.3276	47252.2	66.4749	0.0545841	8.02996	0.402737	8.02879	1107.65	20.9063	1134.08	205.727	1073.67	83.9641
FC-1	38.8463	2.20612	2.2582e+06	175004	442357	977890	1.33681e+07	1.93572	10.3223	0.184713	1.46371	13.1512	10.218	55511.4	216.504	0.061325	7.84621	0.452359	7.84131	1092.67	14.7115	1096.08	204.658	1202.39	91.5893
FC-1	49.6881	12.795	6.25415e+06	475841	1.60568e+06	3.83319e+06	3.70295e+07	1.83947	6.22312	0.184717	1.28494	13.8397	6.08902	156172	95.4025	0.0569062	6.36162	0.418889	6.36147	1092.69	12.915	993.153	123.814	1118.1	69.1969	rev discord
FC-1	14.5308	3.2733	3.39001e+06	257546	653185	1.5591e+06	2.00661e+07	1.8119	10.052	0.184749	1.64397	14.0527	9.91667	79337.7	361.061	0.0568431	6.39305	0.418952	6.3883	1092.87	16.526	962.047	202.722	1116.89	69.4657	rev discord
FC-1	29.4961	0.591416	1.05778e+06	84017.6	161260	384918	6.20501e+06	2.18978	17.6502	0.186344	1.32496	11.7281	17.6004	26545.4	137.664	0.0565211	8.42235	0.418946	8.40098	1101.54	13.4161	1321.56	341.656	1110.74	91.0252
FC-1	43.2296	9.47956	1.26172e+06	94681.3	233011	515728	7.37647e+06	2.23383	16.4891	0.186982	1.40104	11.5362	16.4295	29131.3	234.491	0.0610715	6.92552	0.451809	6.89902	1105.01	14.2274	1353.46	317.408	1197.56	80.527
FC-1	71.2569	3.95834	1.10323e+06	80643.3	228339	558925	6.52862e+06	2.32445	20.3012	0.18472	1.5008	10.9523	20.2456	27294.1	269.152	0.055237	8.16707	0.408533	8.14743	1092.71	15.0848	1452.95	386.169	1086.17	86.3658	high 6/7 err discordant
FC-1	65.2143	13.9863	4.77737e+06	363915	818064	1.79628e+06	2.83341e+07	1.85614	8.47719	0.184398	1.84535	13.6917	8.2739	117683	267.127	0.0618217	7.4971	0.455422	7.49538	1090.95	18.5206	1014.96	167.714	1211.84	88.1817
FC-1	36.8626	10.7465	1.18965e+06	89328.9	163326	387643	7.06106e+06	2.24978	15.4749	0.184153	1.34188	11.2811	15.4166	23760.8	4909.55	0.0567368	8.79628	0.421331	8.60695	1089.62	13.4525	1396.46	296.039	1114.86	95.4096	discordant
FC-1	5.25299	8.36608	1.32254e+06	100569	213664	513809	7.77487e+06	2.32865	14.5842	0.185982	1.35012	11.0072	14.5216	40278.1	365.076	0.0562665	6.95135	0.415844	6.92838	1099.57	13.6484	1443.43	277.023	1105.87	74.8068	discordant
FC-1	49.5735	9.99623	3.21824e+06	248502	678235	1.60806e+06	1.90723e+07	1.8881	6.75765	0.184519	1.14606	13.4688	6.65976	66995.9	415.355	0.0572164	6.1497	0.421774	6.14328	1091.62	11.5087	1048.17	134.301	1124.03	67.2366
FC-1	41.8828	7.5822	1.99761e+06	151978	426039	1.02976e+06	1.18429e+07	2.13319	9.83062	0.184426	1.36805	11.9153	9.73496	43936	55.1811	0.0560621	6.43017	0.413727	6.42888	1091.11	13.732	1290.82	189.506	1101.96	68.96
FC-1	15.0799	7.99327	1.9118e+06	144290	337311	810005	1.12778e+07	1.95972	10.6632	0.185358	1.41646	13.0356	10.5687	51260.9	1097.65	0.0564218	7.56802	0.416431	7.54675	1096.18	14.2786	1113.72	211.141	1108.84	81.6557
FC-1	48.4062	7.93718	3.30028e+06	251886	645820	1.60986e+06	1.93647e+07	1.86037	8.41004	0.186375	1.41003	13.807	8.291	82420.1	215.872	0.0544358	7.27383	0.401166	7.2715	1101.71	14.2794	997.941	168.458	1070.82	75.8617	rev discord
FC-1	28.943	14.4461	3.14868e+06	242875	498857	1.13704e+06	1.87997e+07	1.82292	8.31587	0.18315	1.75769	13.8469	8.12799	65768	376.61	0.0594705	6.52847	0.438734	6.51831	1084.16	17.5399	992.098	165.367	1167.05	74.032
FC-1	39.1972	19.39	2.26535e+06	176709	444803	1.0853e+06	1.34112e+07	1.93263	10.8892	0.184694	1.69956	13.171	10.7558	48581.2	90.2503	0.0555391	6.26202	0.409843	6.25937	1092.57	17.0805	1093.07	215.513	1091.95	66.5631
FC-1	42.0201	0.24175	3.30159e+06	250962	613261	1.44025e+06	1.94521e+07	1.81913	7.35563	0.185592	1.21031	14.0607	7.25537	54132.7	273.076	0.0577112	6.88514	0.425801	6.87713	1097.45	12.2134	960.892	148.257	1133.48	75.893	rev discord
FC-1	34.1463	13.6087	2.08995e+06	155224	380263	944555	1.2381e+07	1.93499	10.5239	0.18457	1.41278	13.146	10.4286	47329.5	121.843	0.0545362	6.93894	0.402584	6.93453	1091.89	14.1903	1096.85	208.821	1072.75	72.4957
FC-1	15.0456	10.1878	3.19657e+06	242942	626224	1.465e+06	1.89243e+07	1.90481	9.34492	0.184719	1.71359	13.3651	9.18647	81671.6	388.574	0.0580026	6.92175	0.427458	6.91756	1092.7	17.2235	1063.73	184.829	1139.05	76.6605
FC-1	30.2438	14.5318	1.26185e+06	94208.6	204096	488279	7.40673e+06	2.30917	17.826	0.186224	1.79308	11.1146	17.7356	25954.9	413.372	0.056408	6.98147	0.417991	6.916	1100.89	18.1463	1424.92	339.373	1108.58	75.3097	discordant
FC-1	61.1438	2.54292	3.23787e+06	251871	654319	1.53954e+06	1.91719e+07	1.8782	9.09593	0.184676	1.47675	13.5513	8.97525	61059.2	85.3462	0.0576369	6.59564	0.425009	6.5943	1092.47	14.8401	1035.8	181.394	1132.06	72.6133
FC-1	56.9322	11.3321	2.64615e+06	206638	411203	920169	1.5767e+07	1.92956	12.8036	0.183529	1.31008	13.1087	12.7364	72533.2	335.853	0.0605881	7.05176	0.446878	7.04439	1086.22	13.0961	1102.59	254.945	1188.35	81.3829
FC-1	39.2621	2.70427	1.82008e+06	137489	297085	685794	1.07136e+07	1.91983	13.8122	0.185747	1.56903	13.3344	13.7228	42529.1	2697.16	0.0586324	8.42668	0.433199	8.38631	1098.29	15.8445	1068.36	276.108	1151.07	94.2855
FC-1	5.56961	16.2543	3.20495e+06	245548	614734	1.47476e+06	1.9033e+07	1.84402	8.80688	0.184136	1.8038	13.7621	8.62017	66739.8	93.1462	0.0565339	6.84267	0.416837	6.84126	1089.53	18.0819	1004.55	175.016	1110.98	73.9684
FC-1	83.8153	1.27839	2.16804e+06	162648	432191	1.09121e+06	1.26429e+07	1.90071	11.0433	0.187502	1.34993	13.5957	10.9605	49347	230.046	0.0536775	6.58803	0.396066	6.58053	1107.83	13.7405	1029.2	221.759	1056.29	67.8009
FC-1	88.0269	5.30678	3.45855e+06	265954	545893	1.22004e+06	2.05222e+07	1.82975	9.33813	0.184298	1.55606	13.8816	9.20757	83318.8	3379.63	0.0606879	8.12591	0.447437	8.11384	1090.41	15.61	987.009	187.468	1190.26	93.9251	rev discord
FC-1	61.9869	6.44176	5.57627e+06	428957	1.13436e+06	2.69406e+06	3.30678e+07	1.83299	5.53311	0.184423	1.79992	13.8665	5.23217	124081	808.646	0.0571748	7.47442	0.421058	7.47196	1091.09	18.0668	989.204	106.411	1123.23	81.664	rev discord
FC-1	46.2393	5.89243	2.00903e+06	155911	224609	519428	1.18536e+07	2.01668	10.6578	0.185313	1.6869	12.6643	10.5234	42919	144.002	0.058409	8.31865	0.432417	8.3037	1095.93	17.0013	1171.21	208.427	1146.8	92.7416
FC-1	27.1233	15.0492	2.91728e+06	228093	569663	1.42329e+06	1.72229e+07	1.89176	11.161	0.185223	1.36981	13.494	11.0766	64732.9	243.452	0.0542817	7.04527	0.400244	7.04064	1095.44	13.7999	1044.36	223.602	1067.87	73.2808
FC-1	5.33302	4.06274	2.55506e+06	202420	422674	1.01314e+06	1.52023e+07	1.93448	11.083	0.183771	1.37406	13.0926	10.9975	47943.7	122.93	0.0564974	7.18235	0.417192	7.17725	1087.54	13.751	1105.01	220.018	1110.29	77.5929
FC-1	0.755394	5.91455	2.65518e+06	203032	520556	1.25923e+06	1.56913e+07	1.9242	10.2431	0.185028	1.35028	13.2526	10.1537	54241.5	673.477	0.0560389	6.69465	0.413392	6.68081	1094.38	13.591	1080.7	203.873	1101.51	71.7683
FC-1	3.09002	8.66119	920321	68095.7	172782	430217	5.41339e+06					9.99058	20.7214	22831.7	695.273	0.0542063	7.53192	0.401615	7.45099	1098.68	14.3075	1625.82	386.409	1066.43	78.2393	high 6/7 err discordant
FC-1	26.9975	16.3712	815161	67880.5	89268.1	200854	4.84849e+06					8.48558	21.9644	17230.6	841.356	0.0594295	16.2577	0.444442	16.0355	1087.26	15.347	1923.82	394.92	1166.27	184.241	high 6/7 err discordant
FC-1	26.9975	17.653	3.88468e+06	300941	851993	2.06312e+06	2.28843e+07	1.85647	8.69039	0.185634	1.63086	13.781	8.53599	78131.4	399.617	0.0560428	5.84938	0.412962	5.84492	1097.68	16.4605	1001.77	173.379	1101.59	62.711
FC-1	51.1337	19.1893	3.40855e+06	260119	728626	1.78937e+06	2.01341e+07	1.82313	8.81396	0.185126	2.07881	13.9946	8.5653	68921.7	135.223	0.0552439	7.42173	0.407196	7.42011	1094.92	20.9332	970.506	174.808	1086.3	78.4932	rev discord
FC-1	96.7284	23.767	6.80662e+06	520442	1.85195e+06	4.32525e+06	4.03674e+07	1.82242	6.25533	0.184412	1.55879	13.9461	6.058	160720	315.719	0.0581711	7.45235	0.428173	7.45191	1091.03	15.6456	977.591	123.44	1142.26	82.7637	rev discord
FC-1	30.4842	1.13062	6.35784e+06	490243	1.58974e+06	3.7029e+06	3.75182e+07	1.84639	5.76176	0.185328	1.25081	13.8335	5.62435	124381	432.892	0.0583106	6.08969	0.429323	6.08833	1096.02	12.607	994.089	114.361	1144.93	67.7837	rev discord
FC-1	16.9339	14.2505	3.03347e+06	238794	590652	1.36736e+06	1.79688e+07	1.93198	8.23559	0.184606	1.26412	13.1691	8.13799	64627.8	187.803	0.0585833	6.4114	0.431966	6.40769	1092.09	12.6993	1093.39	163.062	1150.13	71.6798
FC-1	48.2269	12.1339	3.39363e+06	260404	642624	1.58283e+06	2.00645e+07	1.83214	7.00262	0.18496	1.7984	13.9134	6.76775	78377.6	249.067	0.055082	6.01545	0.405996	6.01156	1094.02	18.0959	982.371	137.851	1083.2	63.4434	rev discord
FC-1	46.762	20.0076	4.66467e+06	356582	843403	1.96018e+06	2.73544e+07	1.84162	6.85715	0.186494	1.58775	13.9565	6.6708	111369	116.711	0.0584072	5.62133	0.430268	5.6204	1102.36	16.088	976.065	136.006	1146.77	62.6682	rev discord
FC-1	15.3203	6.97263	5.64219e+06	433633	1.29034e+06	3.02017e+06	3.32044e+07	1.84538	6.49253	0.185835	1.81216	13.8789	6.2345	125620	513.752	0.058023	5.57299	0.427241	5.57101	1098.78	18.3071	987.403	126.883	1139.44	61.7431	rev discord
FC-1	17.1514	6.4233	6.75165e+06	518998	1.80626e+06	4.31529e+06	4.00804e+07	1.8304	5.56528	0.184232	1.97369	13.8718	5.20355	161607	671.902	0.0568663	6.21106	0.418571	6.21015	1090.06	19.7937	988.454	105.86	1117.34	67.5143	rev discord
FC-1	53.9796	9.03799	7.12931e+06	546852	1.36902e+06	3.42897e+06	4.131e+07	1.8713	6.29407	0.188748	1.44778	13.9012	6.1253	166090	573.395	0.0542276	6.63094	0.399251	6.62954	1114.59	14.8189	984.151	124.723	1066.84	68.9059	rev discord
FC-1	1.60982	25.7009	4.17336e+06	321951	857456	2.03923e+06	2.40827e+07	1.88678	8.56903	0.189502	1.99049	13.8422	8.33464	71439	868.033	0.0570459	7.06406	0.42048	7.05623	1118.68	20.4422	992.787	169.537	1120.77	77.0159	rev discord
FC-1	83.9678	1.06552	4.01514e+06	304787	934740	2.26677e+06	2.36416e+07	1.82182	6.92743	0.185739	1.56439	14.0511	6.74848	132247	144.941	0.0560071	7.21205	0.412367	7.21164	1098.25	15.7971	962.284	137.882	1100.91	77.2734	rev discord
FC-1	50.0923	3.62905	2.19958e+06	167141	465149	1.08164e+06	1.29538e+07	1.88555	10.4068	0.185665	1.54777	13.5707	10.2911	49703.8	265.913	0.0582935	7.36836	0.430039	7.36167	1097.85	15.624	1032.92	208.12	1144.6	81.9937
FC-1	86.4322	17.4897	7.41149e+06	571888	1.84697e+06	4.62262e+06	4.38952e+07	1.84169	6.29002	0.184661	1.62672	13.8189	6.07603	163675	414.161	0.0542798	6.9081	0.39955	6.90743	1092.39	16.3461	996.208	123.491	1067.84	71.8516
FC-1	101.447	16.208	1.58008e+06	127191	269126	662374	9.28943e+06	2.15063	14.0125	0.185961	1.48072	11.917	13.934	35502.3	810.689	0.0549558	7.15451	0.406305	7.11011	1099.46	14.9673	1290.53	271.476	1080.79	75.293
FC-1	54.9219	25.1915	3.06951e+06	237511	614452	1.39621e+06	1.82301e+07	1.8371	7.92992	0.184111	1.15894	13.8121	7.84477	53735.9	115.791	0.0596593	6.36977	0.440085	6.36689	1089.39	11.6163	997.195	159.403	1170.65	72.4487
FC-1	36.7938	30.8678	1.94198e+06	148791	412630	963869	1.15455e+07	1.96829	13.6374	0.18389	1.68284	12.876	13.5332	34823.8	135.848	0.0579579	6.22891	0.428098	6.22129	1088.19	16.8503	1138.3	269.5	1138.19	68.9369
FC-1	27.6879	18.2153	3.57109e+06	276014	720999	1.66211e+06	2.12943e+07	1.85605	8.47411	0.183387	1.43465	13.6173	8.35179	70139.7	138.432	0.0588463	8.24066	0.433787	8.23904	1085.45	14.332	1025.99	169.007	1155.15	92.5218
FC-1	19.8142	7.59502	1.88472e+06	143278	324052	751435	1.11357e+07	1.98337	13.2879	0.185045	1.40265	12.8584	13.2137	38382.6	219.541	0.0583542	7.91725	0.431244	7.90408	1094.48	14.1192	1141.03	263.018	1145.76	88.1883
FC-1	42.52	20.0998	3.81393e+06	291915	711583	1.76339e+06	2.25896e+07	1.8451	8.14821	0.18463	1.52162	13.7909	8.00488	73662	597.876	0.0547383	6.91323	0.403531	6.90563	1092.22	15.2878	1000.31	162.619	1076.62	72.4808
FC-1	20.9129	10.5782	1.62043e+06	123698	336720	825813	9.57736e+06	2.15741	17.1506	0.184974	1.55748	11.8165	17.0798	35208.8	159.713	0.0551998	7.48286	0.407744	7.47471	1094.09	15.6727	1306.99	332.154	1085.46	79.0799
FC-1	42.909	28.091	2.01877e+06	152962	374508	888175	1.19437e+07	2.08448	13.2547	0.184793	1.63378	12.218	13.1536	37029.5	511.253	0.0570679	7.58006	0.42166	7.5545	1093.11	16.4269	1241.86	257.982	1121.19	82.6717
FC-1	38.1481	8.86456	5.18174e+06	399146	507315	1.21932e+06	3.04644e+07	1.85126	5.9652	0.186022	1.53629	13.8487	5.76398	118916	808.528	0.0564155	7.55457	0.416065	7.54322	1099.79	15.5332	991.842	117.243	1108.72	81.5021	rev discord
FC-1	37.5798	2.77152	2.15699e+06	161698	364125	850804	1.28515e+07	1.89488	10.6359	0.183524	1.35349	13.3483	10.5494	52625.7	153.526	0.0579826	7.41883	0.427978	7.41374	1086.2	13.5297	1066.27	212.247	1138.66	82.1391
FC-1	28.2411	15.3562	1.56504e+06	117117	245352	646524	9.2609e+06	2.05396	13.4699	0.184746	1.39494	12.3964	13.3974	31433.1	266.515	0.0512691	8.0819	0.379494	8.05378	1092.85	14.0224	1213.4	263.853	1010.06	79.6252
FC-1	48.9111	20.7145	1.52284e+06	114198	308239	723202	8.99105e+06	2.04436	14.0393	0.185159	1.06207	12.4824	13.9991	31374.9	261.623	0.0576629	7.59264	0.426214	7.5746	1095.1	10.6965	1199.76	276.271	1132.56	83.6252
FC-1	34.6283	11.0097	5.09005e+06	387381	953618	2.26044e+06	3.00956e+07	1.81832	5.32874	0.184964	1.2596	14.0194	5.17773	107322	165.109	0.0572674	6.7919	0.421872	6.79071	1094.04	12.6746	966.883	105.666	1125	74.3206	rev discord
FC-1	55.1368	23.8273	3.80416e+06	289343	414576	955704	2.25249e+07	1.81324	7.33044	0.184689	1.0251	14.0377	7.25841	76489.1	280.345	0.0587566	6.81901	0.433791	6.80685	1092.54	10.302	964.226	148.225	1153.44	76.45	rev discord
FC-1	33.8959	10.2773	4.86244e+06	367964	592318	1.32708e+06	2.85231e+07	1.82336	6.00127	0.186444	1.06157	14.0925	5.90663	148934	2922.58	0.0605776	6.86073	0.446332	6.85341	1102.08	10.754	956.238	120.749	1188.15	79.1653	rev discord
FC-1	41.9528	13.7563	2.02305e+06	153056	335843	843502	1.19443e+07	1.94223	11.6099	0.185186	1.67708	13.1408	11.4881	42226.5	2216.45	0.0538914	7.2379	0.398153	7.19337	1095.25	16.8925	1097.68	230.043	1060.39	74.7707
FC-1	0.935982	8.62931	1.31607e+06	99032.3	191607	456015	7.84493e+06	2.08003	13.0174	0.183395	1.20313	12.1515	12.9617	30359.7	185.34	0.0567239	8.6647	0.420177	8.64232	1085.5	12.0196	1252.51	253.82	1114.62	93.9623
72719PK2B
FC-1	10.2618	17.7508	2.47134e+06	190946	494836	1.46082e+06	1.50757e+07	1.96143	2.48178	0.185254	1.69128	13.0168	1.81626	64932.7	199.189	0.0558868	3.26432	0.338739	3.25698	1095.61	17.0408	1116.63	36.2079	1098.61	34.9043
FC-1	18.3187	19.2156	1.72793e+06	133361	283729	892494	1.04312e+07	1.97572	2.67872	0.187167	1.65229	13.0562	2.10843	38730.7	88.4991	0.0523187	2.8236	0.317906	2.81184	1106.01	16.7928	1110.57	42.1171	1030.22	28.3601
FC-1	60.2509	8.96156	2.42453e+06	187171	456986	1.34637e+06	1.47256e+07	1.96781	2.49839	0.186062	1.67469	13.0313	1.85401	59505.9	2757.05	0.0559782	3.14532	0.339422	3.10371	1100.01	16.9357	1114.39	36.9966	1100.35	33.684
FC-1	84.4215	9.8771	1.14216e+06	87878.3	188767	533658	6.90227e+06	1.96128	3.30262	0.186922	1.69144	13.1351	2.83661	24111	95.069	0.0580429	3.26277	0.353722	3.23017	1104.68	17.1717	1098.56	56.7232	1139.82	36.1599
FC-1	34.4477	3.65659	2.29626e+06	172557	401696	1.18246e+06	1.39744e+07	1.91183	1.95513	0.185693	1.22051	13.3863	1.52738	62430.2	1151.53	0.0560221	3.37555	0.339713	3.34205	1098	12.3221	1060.55	30.7372	1101.19	36.1765
FC-1	56.2378	18.1222	3.05688e+06	233760	525090	1.39729e+06	1.84481e+07	1.96111	1.86034	0.18725	1.17074	13.1593	1.44577	54888	218.887	0.0619439	3.47851	0.375792	3.46402	1106.46	11.903	1094.88	28.9076	1214.16	40.9907
FC-1	27.3674	0.197583	2.42016e+06	186680	447010	1.34333e+06	1.47305e+07	1.96188	1.88959	0.185664	1.22325	13.0427	1.44021	58497.7	107.362	0.0548742	3.19819	0.332763	3.1932	1097.84	12.3481	1112.63	28.756	1079.22	33.6099
FC-1	15.6482	4.04287	2.73119e+06	208409	503711	1.4618e+06	1.6586e+07	1.94494	1.94131	0.186083	1.20906	13.186	1.51883	56894.4	490.554	0.0568183	3.43105	0.344582	3.40729	1100.12	12.2281	1090.78	30.3992	1116.42	37.2658
FC-1	0.621777	3.39464	5.94806e+06	455570	1.45624e+06	4.27253e+06	3.56192e+07	1.98428	1.67293	0.188742	1.24613	13.1093	1.11618	160252	200.778	0.0563232	2.54269	0.340838	2.54165	1114.56	12.7545	1102.5	22.3218	1106.95	27.3892
FC-1	0.659983	13.0851	1.96545e+06	150226	306600	911922	1.19967e+07	1.93791	2.18625	0.185137	1.17868	13.1666	1.8413	53817	7302.93	0.0553973	3.53937	0.336213	3.46613	1094.98	11.8697	1093.77	36.8335	1089.24	37.5313
FC-1	72.9734	12.8303	4.36867e+06	334784	1.01383e+06	2.97572e+06	2.65508e+07	1.95475	2.10898	0.185961	1.55443	13.1113	1.42533	99915.5	47.9787	0.0562695	3.38196	0.3407	3.38165	1099.46	15.7124	1102.2	28.5045	1105.93	36.3966
FC-1	51.3663	8.25259	1.66217e+06	127088	277999	804539	1.00995e+07	1.94657	2.63773	0.185973	1.56819	13.1672	2.12095	48463.1	130.695	0.0569262	3.40897	0.345538	3.39801	1099.52	15.8523	1093.68	42.4325	1118.48	37.0925
FC-1	38.6097	1.28447	3.14298e+06	240850	565947	1.64378e+06	1.91762e+07	1.94676	1.90493	0.185236	1.27884	13.1137	1.41185	91899.3	202.751	0.0568328	3.03852	0.344296	3.03351	1095.52	12.8841	1101.82	28.2363	1116.7	33.0103
FC-1	75.0487	9.34125	6.66333e+06	510030	1.40385e+06	4.09469e+06	4.04084e+07	1.95805	1.75388	0.186379	1.29407	13.1185	1.18385	150954	218.092	0.0566447	3.10562	0.342847	3.10419	1101.73	13.1053	1101.05	23.643	1113.1	33.6336
FC-1	26.9365	5.29942	3.15691e+06	241436	648920	1.84636e+06	1.93415e+07	1.93425	1.84558	0.184463	1.27129	13.1434	1.33791	81216.1	106.57	0.0580161	2.78755	0.351459	2.7851	1091.31	12.7629	1097.29	26.7768	1139.3	30.8797
FC-1	34.2608	17.9339	6.13854e+06	471500	1.52182e+06	4.51618e+06	3.75935e+07	1.94544	1.92181	0.184554	1.45676	13.0742	1.25347	138853	462.144	0.0556778	3.02075	0.33697	3.01838	1091.8	14.631	1107.81	25.0462	1094.61	32.1856
FC-1	28.6913	1.66089	2.21764e+06	169775	443464	1.30204e+06	1.32692e+07	1.98114	2.62986	0.188867	1.6673	13.1387	2.03378	62932	572.39	0.0561883	3.66441	0.340592	3.64764	1115.24	17.0748	1097.97	40.7048	1104.37	39.3825
FC-1	43.7062	3.09993	2.65128e+06	203485	486391	1.40628e+06	1.62009e+07	1.94482	2.49645	0.184938	1.63641	13.1057	1.88532	62801.2	378.354	0.057046	3.25106	0.345871	3.2338	1093.89	16.4642	1103.03	37.6775	1120.77	35.4447
FC-1	42.8213	2.1287	4.87389e+06	372601	963420	2.76917e+06	2.96947e+07	1.94618	2.18757	0.18551	1.58771	13.137	1.50487	132168	149.738	0.0574689	3.40881	0.347909	3.40755	1097.01	16.0159	1098.23	30.1153	1128.85	37.4251
FC-1	20.848	7.20985	3.09055e+06	236531	564324	1.67706e+06	1.87936e+07	1.94846	2.26469	0.185836	1.58434	13.1447	1.61823	59875.3	140.918	0.0554916	2.98287	0.336496	2.97541	1098.78	16.0056	1097.07	32.3745	1091.04	31.6812
FC-1	70.0512	5.8505	1.69987e+06	130601	287372	832310	1.02706e+07	1.96405	2.48931	0.186999	1.36166	13.122	2.08387	35286.9	338.498	0.0568038	3.613	0.345271	3.56181	1105.1	13.8286	1100.56	41.723	1116.14	39.2325
FC-1	54.853	4.20253	2.24648e+06	171651	361456	1.02558e+06	1.3761e+07	1.9302	2.01381	0.184477	1.29705	13.172	1.54048	52450.3	104.448	0.0580723	3.83002	0.352442	3.82335	1091.38	13.0223	1092.9	30.8392	1140.38	42.4668
FC-1	27.0355	11.1957	1.40543e+06	108222	173770	508086	8.50107e+06	1.96513	2.48852	0.186782	1.36113	13.0995	2.08328	31949.5	279.331	0.0561171	3.30439	0.34201	3.2013	1103.92	13.8096	1103.97	41.6709	1103.01	35.4707
FC-1	3.59736	5.6503	4.37948e+06	334870	1.02174e+06	2.99604e+06	2.67273e+07	1.94287	1.9145	0.185195	1.33863	13.137	1.36872	116148	420.362	0.0563348	3.09854	0.341029	3.09506	1095.29	13.484	1098.23	27.3504	1107.18	33.3831
FC-1	55.925	28.1544	2.02112e+06	154741	408915	1.23027e+06	1.20814e+07	1.9799	2.2595	0.189026	1.37662	13.158	1.79172	41390.5	467.734	0.0547652	3.52644	0.332379	3.49174	1116.1	14.1079	1095.07	35.8311	1077.13	36.9896
FC-1	41.093	7.28003	4.33577e+06	331606	1.01484e+06	2.92282e+06	2.63832e+07	1.94868	1.99686	0.185735	1.43218	13.136	1.39151	105275	394.951	0.0573497	3.81167	0.347213	3.80839	1098.23	14.4618	1098.42	27.8069	1126.58	41.766
FC-1	56.8292	38.9542	5.90741e+06	451709	1.64773e+06	4.86087e+06	3.62191e+07	1.93335	2.15588	0.184335	1.52446	13.1404	1.52441	98904.6	1953.65	0.0559972	3.26338	0.338979	3.25719	1090.61	15.2956	1097.75	30.5052	1100.72	34.9596
FC-1	39.9829	31.4468	1.85599e+06	142355	366634	1.0874e+06	1.12699e+07	1.95123	2.37783	0.186071	1.58093	13.1426	1.77615	36222.4	125.436	0.0555187	3.2616	0.337167	3.24736	1100.05	15.9881	1097.39	35.5283	1091.56	34.6576
FC-1	27.7527	6.2616	1.27481e+06	97956.7	179678	558227	7.77648e+06	1.94553	2.82048	0.185218	1.47581	13.1207	2.40356	35085.4	1387.65	0.052897	3.85653	0.321873	3.70485	1095.42	14.8673	1100.72	48.0781	1041.32	39.1414
FC-1	66.206	22.9245	2.00319e+06	154146	338311	982040	1.22413e+07	1.94698	2.34736	0.184907	1.49637	13.089	1.80858	43087	379.466	0.05673	3.40499	0.344498	3.36456	1093.73	15.0531	1105.6	36.1826	1114.73	36.9283
FC-1	43.7253	7.69385	3.11366e+06	238761	564249	1.62975e+06	1.90122e+07	1.9461	1.94012	0.185088	1.2931	13.1076	1.44636	83593.2	2483.29	0.0571402	4.41926	0.346218	4.40332	1094.71	13.019	1102.75	28.9488	1122.57	48.2562
FC-1	68.0789	31.8642	5.05877e+06	388625	1.03361e+06	3.06714e+06	2.97719e+07	2.02395	1.94119	0.192042	1.41504	13.077	1.32886	108756	330.941	0.0556544	4.01054	0.336994	4.0072	1132.43	14.6957	1107.4	26.553	1094.16	42.7145
FC-1	41.28	1.43841	5.65636e+06	432330	1.03111e+06	2.98711e+06	3.42771e+07	1.95702	2.03211	0.186517	1.46209	13.1352	1.4113	176123	227.323	0.0570316	4.3781	0.345186	4.37707	1102.48	14.8162	1098.55	28.2017	1120.5	47.7209
FC-1	45.3084	11.5623	3.08374e+06	236451	569710	1.67151e+06	1.88008e+07	1.94889	2.12939	0.18537	1.44903	13.1089	1.56032	82683.5	1767.74	0.0562529	3.92558	0.340836	3.90913	1096.25	14.6077	1102.56	31.2427	1105.61	42.2353
FC-1	66.389	5.83909	1.81576e+06	139464	243456	730048	1.09908e+07	1.96263	2.27748	0.186681	1.33122	13.1092	1.84791	46625.3	2865.16	0.054877	7.5711	0.33348	7.51512	1103.37	13.5001	1102.51	36.9915	1079.28	79.5689
FC-1	49.3597	9.86748	1.11168e+06	86016.5	168580	509381	6.67052e+06	1.9886	3.1142	0.188271	1.36346	13.0482	2.79986	27565	11775.9	0.0543265	8.44099	0.330952	8.31471	1112	13.9261	1111.8	55.938	1068.73	87.867
FC-1	29.3893	2.81885	4.42077e+06	338648	1.01641e+06	2.97814e+06	2.68187e+07	1.95755	1.91748	0.186299	1.44022	13.1163	1.2659	99960.2	425.906	0.0563665	4.50873	0.341291	4.50538	1101.3	14.5803	1101.39	25.2942	1107.78	48.6021
FC-1	27.5581	12.1574	2.55485e+06	195729	525720	1.58026e+06	1.5499e+07	1.95537	1.96193	0.186281	1.29626	13.1296	1.47271	62467.8	262.437	0.0548855	4.10154	0.332679	4.09345	1101.2	13.1217	1099.39	29.4294	1079.44	43.1116
FC-1	25.788	6.36849	2.02796e+06	155699	441313	1.30446e+06	1.23161e+07	1.95423	1.98472	0.186052	1.25318	13.1211	1.53904	41384.8	112.381	0.055757	5.55037	0.338311	5.54581	1099.95	12.6725	1100.65	30.7993	1096.12	59.2178
FC-1	45.7471	2.97005	2.57614e+06	197320	526024	1.54456e+06	1.55764e+07	1.9629	1.95781	0.186912	1.2518	13.1235	1.50533	80720.4	831.803	0.0562166	5.27664	0.340565	5.26852	1104.63	12.7078	1100.29	30.1147	1104.92	56.7367
FC-1	41.0587	27.0382	2.58405e+06	198915	452329	1.27288e+06	1.57119e+07	1.95938	2.34659	0.185852	1.60844	13.0725	1.70863	54531.2	108.106	0.0585779	4.01098	0.355358	4.00597	1098.86	16.2502	1108.07	34.1435	1150.03	44.8391
FC-1	19.6348	27.7707	1.53225e+06	117905	277682	843988	9.29099e+06	1.95961	2.74569	0.186328	1.63414	13.1045	2.20645	33901.3	161.274	0.054137	3.46651	0.329012	3.44169	1101.45	16.5456	1103.19	44.1408	1065.1	35.9654
FC-1	63.65	17.1548	3.0084e+06	229994	539611	1.53597e+06	1.83112e+07	1.9448	2.02081	0.185664	1.39303	13.1573	1.46394	62538.9	172.609	0.0579397	3.67248	0.351315	3.665	1097.85	14.062	1095.18	29.27	1137.85	40.6322
FC-1	41.1273	24.296	3.62717e+06	278314	364249	965919	2.20295e+07	1.95706	2.07212	0.186077	1.51603	13.1039	1.41256	72241.7	127.994	0.0620982	3.63227	0.377102	3.61917	1100.09	15.3323	1103.3	28.2446	1217.1	42.9029
FC-1	12.8063	5.09997	2.63176e+06	200477	487154	1.41805e+06	1.60048e+07	1.93957	2.30676	0.185826	1.58763	13.2042	1.67349	63508.4	50.1415	0.0566643	4.14368	0.343538	4.14262	1098.72	16.0381	1088.05	33.5014	1113.48	44.8904
FC-1	22.8774	2.53645	1.9711e+06	151576	393846	1.18461e+06	1.19521e+07	1.9615	2.4823	0.186352	1.65682	13.0935	1.84845	46526.2	37.9869	0.0548002	4.06855	0.33247	4.06749	1101.58	16.777	1104.86	36.9698	1077.81	42.7019
FC-1	26.8449	11.2078	2.42847e+06	185223	460859	1.38564e+06	1.47558e+07	1.9427	2.35967	0.185978	1.58795	13.1938	1.7454	54845.5	1278.18	0.0548406	3.89675	0.332596	3.86366	1099.55	16.0524	1089.63	34.968	1078.58	40.9273
FC-1	29.4083	4.98209	3.45881e+06	264467	601742	1.83519e+06	2.10856e+07	1.94393	2.15565	0.18539	1.54753	13.1437	1.50067	89033.6	122.995	0.0541178	3.72512	0.327891	3.72261	1096.35	15.602	1097.23	30.0066	1064.73	38.6355
FC-1	54.4143	18.7262	6.20183e+06	474225	1.4641e+06	4.48354e+06	3.72942e+07	1.9722	1.81879	0.187951	1.29573	13.1343	1.27636	131038	12407.3	0.0539506	5.19039	0.32655	5.18665	1110.27	13.2153	1098.68	25.5278	1061.53	53.6748
FC-1	31.3424	6.09167	1.52123e+06	116326	250527	788338	9.23671e+06	1.94587	2.42487	0.186084	1.31229	13.1798	2.0391	37783.9	84.9704	0.0522941	5.46786	0.317791	5.46131	1100.13	13.2722	1091.72	40.8047	1029.75	54.8944
FC-1	19.8866	14.8204	4.1096e+06	314640	877112	2.66349e+06	2.44245e+07	1.99561	2.07616	0.190151	1.59911	13.1321	1.32413	73638.1	106.036	0.0543537	4.6512	0.329309	4.64958	1122.19	16.47	1099	26.4921	1069.25	48.4399
FC-1	50.8324	10.2427	1.72746e+06	133479	305886	929116	1.04891e+07	1.96529	2.30493	0.186073	1.27169	13.0487	1.92237	34460.3	1038.89	0.0541697	5.13231	0.329222	5.06449	1100.07	12.8609	1111.71	38.3905	1065.73	53.2788
FC-1	58.7175	11.5834	5.65759e+06	433523	1.18551e+06	3.54456e+06	3.42282e+07	1.9642	1.76853	0.186815	1.30309	13.1081	1.19569	121240	229.155	0.0552454	3.58971	0.33446	3.58765	1104.1	13.2227	1102.68	23.9114	1086.33	37.9662
FC-1	49.0126	0.59689	1.9904e+06	153004	372321	1.09693e+06	1.20373e+07	1.96497	2.03828	0.186837	1.28646	13.1044	1.58102	41698.9	64.9517	0.0559101	3.96647	0.339421	3.96265	1104.22	13.0552	1103.21	31.6504	1099.05	42.4289
FC-1	20.8937	7.56322	2.48855e+06	189924	535022	1.60226e+06	1.49887e+07	1.96078	2.14609	0.187615	1.32226	13.1871	1.69036	52872.3	278.097	0.0550725	4.57379	0.333917	4.56422	1108.44	13.4656	1090.61	33.8437	1083.02	48.2308
FC-1	54.9522	5.18281	2.98301e+06	228228	600641	1.78975e+06	1.80778e+07	1.95506	2.13061	0.186476	1.51904	13.1455	1.494	65258.1	113.797	0.0553705	4.15144	0.335601	4.1485	1102.26	15.3905	1096.98	29.8731	1088.73	44.0015
FC-1	18.0134	1.1941	2.2032e+06	170005	371918	1.15613e+06	1.33422e+07	1.97271	2.30474	0.186608	1.60034	13.0371	1.65853	59941.9	41.039	0.0530385	5.85424	0.321694	5.85351	1102.98	16.2239	1113.49	33.1133	1044.04	59.5679
FC-1	39.6206	22.0685	6.60272e+06	506191	1.23179e+06	3.56998e+06	4.0343e+07	1.94587	2.10894	0.184979	1.60619	13.1015	1.36667	122484	133.047	0.0569856	6.08879	0.345043	6.088	1094.12	16.1632	1103.66	27.344	1119.62	66.3167
FC-1	35.2259	6.14949	1.91355e+06	146126	296692	821641	1.16729e+07	1.9343	2.67586	0.185224	1.76385	13.1973	2.01223	38201.3	68.7102	0.0594051	8.23059	0.361097	8.22719	1095.45	17.7695	1089.06	40.2831	1165.81	93.2369
FC-1	49.6916	19.8826	2.59328e+06	198426	442797	1.37061e+06	1.57484e+07	1.95099	2.50604	0.186091	1.66541	13.1457	1.8726	63100.8	227.952	0.0532747	7.83463	0.323066	7.82928	1100.16	16.8441	1096.95	37.479	1048.57	80.0559
FC-1	26.097	10.208	5.39382e+06	413600	885381	2.61967e+06	3.28779e+07	1.95103	1.87262	0.185422	1.35077	13.0982	1.29697	125785	294.786	0.0558101	7.38113	0.337974	7.37924	1096.53	13.6204	1104.18	25.9667	1097.14	78.8216
FC-1	29.2098	8.37689	4.47587e+06	342976	1.05315e+06	3.08975e+06	2.72031e+07	1.95431	1.92621	0.185954	1.39208	13.1137	1.33131	94070.4	185.041	0.0562911	7.31005	0.340852	7.30902	1099.42	14.0709	1101.83	26.6238	1106.34	78.6995
FC-1	50.6416	10.0668	5.28055e+06	404404	1.08966e+06	3.19404e+06	3.20372e+07	1.9581	1.83321	0.186294	1.3322	13.1122	1.25933	144296	1460.67	0.0563615	7.69232	0.341156	7.69022	1101.27	13.4863	1102.05	25.1665	1107.69	82.9131
FC-1	38.1901	20.5039	1.45291e+06	111396	198005	600252	8.85027e+06	1.94224	2.3048	0.185468	1.42276	13.1607	1.81325	30340.9	66.0181	0.0541442	8.02604	0.32987	8.01943	1096.78	14.3493	1094.66	36.2651	1065.24	83.2815
FC-1	49.314	2.56411	2.34763e+06	180148	475394	1.42285e+06	1.42663e+07	1.95418	2.63387	0.185955	1.79212	13.1146	1.93017	53591.4	1122.23	0.0550978	10.1835	0.334115	10.1725	1099.43	18.1145	1101.68	38.6146	1083.5	107.432
FC-1	32.6509	0.549917	2.08204e+06	158063	424984	1.27963e+06	1.25184e+07	1.95249	2.61995	0.187933	1.70329	13.2656	1.99072	44882.8	160.652	0.054739	10.2938	0.332114	10.2901	1110.17	17.3708	1078.74	39.9154	1076.63	107.925
FC-1	28.4926	5.67805	2.53335e+06	193777	519662	1.53307e+06	1.52823e+07	1.96406	2.20272	0.187339	1.40772	13.1458	1.6942	70865.3	37885.4	0.0559388	6.31797	0.338968	6.30369	1106.94	14.3182	1096.93	33.9076	1099.6	67.6156
FC-1	24.8305	1.10033	2.12032e+06	162683	351301	993731	1.29367e+07	1.94663	2.26771	0.185216	1.50378	13.1132	1.69739	57689.9	321.94	0.0582747	5.93948	0.353517	5.92745	1095.41	15.1489	1101.9	33.9478	1144.24	66.0731
FC-1	19.0358	12.0577	2.56272e+06	196055	502272	1.51079e+06	1.56171e+07	1.9432	2.05039	0.185438	1.40166	13.1521	1.49648	56999.3	323.493	0.0548289	5.56888	0.332457	5.55977	1096.62	14.1345	1095.96	29.9276	1078.35	58.4777
FC-1	8.41541	10.0984	7.29557e+06	558363	2.20345e+06	6.78289e+06	4.4835e+07	1.93233	1.99856	0.183917	1.50988	13.1175	1.30939	177782	2428.79	0.0536933	6.04376	0.324854	6.04284	1088.34	15.1204	1101.2	26.1816	1056.59	62.2169
FC-1	26.1238	26.7063	5.07029e+06	387153	1.06536e+06	3.3062e+06	3.10209e+07	1.93475	1.84934	0.184727	1.30015	13.1588	1.31517	99526.9	905.396	0.0532116	6.74926	0.322232	6.74513	1092.74	13.0684	1094.95	26.2918	1047.36	68.8877
FC-1	21.1797	8.02918	1.56786e+06	119502	246577	752130	9.54352e+06	1.93428	2.21862	0.18562	1.34656	13.2257	1.76325	36357	162.454	0.0539233	7.38291	0.327837	7.36927	1097.61	13.5901	1084.8	35.3548	1061	76.3116
FC-1	90.8915	10.5522	2.38702e+06	182607	434481	1.30022e+06	1.44837e+07	1.95069	1.81658	0.186234	1.1429	13.1578	1.41201	50735	453.112	0.0550774	4.97678	0.334159	4.95741	1100.94	11.5668	1095.1	28.2333	1083.11	52.4847
FC-1	82.8346	19.1114	7.38962e+06	565374	1.57006e+06	4.5744e+06	4.48469e+07	1.95517	1.66658	0.186233	1.19089	13.1275	1.16587	125517	60.3728	0.0566971	5.22744	0.343229	5.22722	1100.94	12.0525	1099.71	23.2864	1114.1	56.6623
FC-1	25.1014	14.1686	1.92951e+06	148668	331087	1.00863e+06	1.16244e+07	1.97734	2.52755	0.187556	1.56	13.0726	1.9887	42627.7	247.467	0.0540566	3.91825	0.328256	3.89399	1108.12	15.8825	1108.05	39.7559	1063.56	40.5949
FC-1	26.9325	5.01318	1.87706e+06	144677	381721	1.19438e+06	1.13554e+07	1.97265	2.49997	0.1868	1.53865	13.0509	1.97038	61193	271.676	0.0527232	3.86094	0.319597	3.85189	1104.02	15.612	1111.38	39.3891	1037.99	39.0639
FC-1	17.5442	3.69861	4.55309e+06	347291	797596	2.34705e+06	2.75848e+07	1.95271	2.1172	0.186555	1.49066	13.1668	1.50349	131774	236.737	0.0561253	4.66906	0.339829	4.66711	1102.69	15.1083	1093.73	30.0674	1103.17	50.1266
FC-1	62.9556	1.86753	7.49371e+06	574423	1.79958e+06	5.47673e+06	4.5489e+07	1.95969	2.12025	0.186199	1.57905	13.095	1.41494	209466	104.088	0.0543081	4.56767	0.328586	4.56751	1100.75	15.9785	1104.66	28.3241	1068.38	47.5321
FC-1	67.007	1.53035	5.08842e+06	389246	997000	2.72535e+06	3.10869e+07	1.94189	2.00164	0.185001	1.42291	13.1299	1.4078	124360	142.7	0.060423	3.06688	0.365825	3.06537	1094.24	14.3202	1099.33	28.1674	1185.21	35.3033
FC-1	57.4853	3.7798	3.04893e+06	233235	539014	1.58317e+06	1.85967e+07	1.94324	2.13042	0.185287	1.42336	13.1411	1.58516	78853.9	173.148	0.0561807	3.66777	0.340465	3.66285	1095.8	14.3435	1097.62	31.6859	1104.23	39.4136
FC-1	24.804	3.8084	2.73785e+06	209168	440573	1.30149e+06	1.65216e+07	1.96104	1.98889	0.187276	1.34638	13.1616	1.46389	70848.5	103.408	0.0558312	2.85272	0.338515	2.84798	1106.6	13.6904	1094.53	29.3094	1097.54	30.4745
FC-1	37.9879	11.1327	2.22936e+06	171048	387569	1.08287e+06	1.35931e+07	1.94719	2.43916	0.185332	1.74281	13.1176	1.70649	52337	1364.56	0.058989	4.39862	0.357909	4.36016	1096.04	17.5663	1101.19	34.1332	1157.87	49.4983
FC-1	56.6269	5.52008	4.93523e+06	377537	889488	2.6847e+06	3.00733e+07	1.94678	1.80272	0.185477	1.32297	13.1307	1.22456	117985	83.4889	0.0547132	3.3983	0.331317	3.39744	1096.83	13.3434	1099.21	24.4809	1076.14	35.6135
FC-1	32.6395	8.44981	2.37807e+06	180743	479481	1.41457e+06	1.43971e+07	1.94434	2.02634	0.186667	1.29769	13.2315	1.5563	68267.1	169.385	0.0559304	2.91416	0.338958	2.90795	1103.29	13.1592	1083.88	31.171	1099.44	31.1832
FC-1	42.0048	5.76377	1.27771e+06	97201.9	160972	470088	7.84797e+06	1.91145	2.5899	0.183937	1.53964	13.2623	2.08256	31174	72.7294	0.0561832	4.00517	0.342431	3.98749	1088.45	15.4198	1079.24	41.7895	1104.28	43.0411
FC-1	58.4847	4.66512	4.16669e+06	319041	1.06134e+06	3.09747e+06	2.55167e+07	1.93871	2.15975	0.184555	1.49882	13.1197	1.55502	111242	105.322	0.056605	3.30411	0.342648	3.30342	1091.81	15.0535	1100.87	31.1182	1112.34	35.7595
FC-1	64.1841	15.9523	2.18289e+06	166222	302260	853950	1.33518e+07	1.92489	1.93804	0.184737	1.25084	13.227	1.48033	43523.3	154.423	0.0582355	3.85373	0.353956	3.83051	1092.8	12.5733	1084.6	29.6637	1143.49	42.8432
FC-1	35.9851	10.6421	1.38073e+06	105916	227173	672999	8.37635e+06	1.95218	2.25462	0.186234	1.28907	13.1477	1.84976	32914.1	240.119	0.0555045	3.40794	0.337553	3.35521	1100.94	13.0462	1096.63	37.0048	1091.29	36.2039
FC-1	12.1196	8.14632	1.0284e+06	78678	133027	392732	6.20679e+06	1.95426	3.48218	0.187177	1.76132	13.2002	3.00389	26787.6	393.234	0.0555159	3.88663	0.338721	3.71706	1106.06	17.9016	1088.63	60.1968	1091.51	41.2973
FC-1	59.9115	5.21658	1.53663e+06	117553	250032	766304	9.36881e+06	1.94075	2.91461	0.185335	1.71904	13.1613	2.35369	47206.2	166.31	0.0537425	3.55772	0.326283	3.54183	1096.05	17.3269	1094.58	47.1258	1057.54	36.6565
FC-1	4.9249	14.492	1.29244e+06	98851.8	200639	619432	7.86827e+06	1.93954	2.26373	0.185581	1.09231	13.187	1.98276	32723.7	483.214	0.0532405	3.76076	0.323908	3.67041	1097.39	11.0221	1090.62	39.6822	1047.91	38.4047
FC-1	28.7293	4.00201	3.12878e+06	239840	563914	1.63068e+06	1.90947e+07	1.946	1.93159	0.18518	1.38881	13.1149	1.34248	76143.5	445.102	0.0570616	4.13573	0.345816	4.12519	1095.21	13.9885	1101.64	26.8536	1121.07	45.1014
FC-1	30.5337	2.36505	3.64182e+06	278742	615130	1.83208e+06	2.23075e+07	1.93685	2.00059	0.184509	1.4123	13.129	1.41696	93638.2	89.6581	0.0554182	8.51676	0.335756	8.51607	1091.56	14.1815	1099.47	28.3272	1089.64	90.3438
FC-1	5.81372	3.67753	1.7551e+06	135336	279575	815163	1.06677e+07	1.96175	2.32164	0.185906	1.45913	13.0606	1.80582	43965.2	90.4574	0.0564685	9.35993	0.342968	9.35652	1099.16	14.7453	1109.9	36.1108	1109.73	101.069
FC-1	21.5002	15.8391	2.3461e+06	180409	414660	1.19792e+06	1.42858e+07	1.95528	1.94179	0.185588	1.28658	13.0814	1.45439	61257.7	526.298	0.0570818	11.5098	0.346148	11.5029	1097.43	12.9829	1106.75	29.1024	1121.46	125.561
FC-1	37.0646	23.5297	2.1175e+06	162602	403104	1.18305e+06	1.28452e+07	1.95822	2.16526	0.186277	1.28278	13.1102	1.74437	48535.4	94.656	0.056161	11.3918	0.340733	11.3901	1101.17	12.9851	1102.35	34.8861	1103.85	122.375
FC-1	47.2388	5.60391	2.96389e+06	225905	538801	1.57766e+06	1.80608e+07	1.93785	2.14012	0.185463	1.56296	13.1901	1.46194	76601.2	1335.52	0.0563545	5.01847	0.341519	5.00405	1096.75	15.7629	1090.18	29.2517	1107.55	54.086
FC-1	51.8165	10.7309	4.80705e+06	367518	811991	2.43929e+06	2.95628e+07	1.92731	1.98231	0.183776	1.49846	13.1417	1.29776	101481	123.263	0.054952	4.40039	0.332881	4.39864	1087.57	14.9963	1097.53	25.9332	1080.71	46.306
FC-1	23.0186	2.8972	2.46006e+06	189831	418377	1.2133e+06	1.50537e+07	1.95265	2.57493	0.184677	1.72995	13.0347	1.90723	63052.4	53663.7	0.056862	3.35469	0.344825	3.30471	1092.47	17.3846	1113.86	38.0451	1117.25	36.4629
FC-1	35.6531	4.36206	1.23443e+06	95011.9	192235	554820	7.51678e+06	1.95089	3.06634	0.185536	1.68858	13.1071	2.55952	31273.2	459.435	0.0569357	3.23793	0.346481	3.12191	1097.15	17.0354	1102.81	51.2094	1118.66	35.2369
FC-1	44.9499	1.41105	1.59587e+06	122580	247828	765736	9.57693e+06	1.9774	2.53456	0.188279	1.43885	13.1226	2.08656	36780.5	576.322	0.053234	3.3641	0.323647	3.27409	1112.04	14.6966	1100.45	41.7488	1047.79	34.3501
FC-1	28.653	12.3221	1.07794e+06	83083.8	135728	401954	6.58224e+06	1.94682	3.16206	0.185007	1.46417	13.0971	2.80264	28187.5	424.304	0.0553553	3.65128	0.337671	3.47809	1094.27	14.7359	1104.33	56.0317	1088.43	38.6901
FC-1	62.9748	14.0193	1.15475e+06	88881	105137	316194	7.11942e+06	1.92538	3.43769	0.183236	2.58159	13.1161	2.27005	27934.1	309.127	0.0543184	7.22202	0.332508	7.07644	1084.63	25.7718	1101.42	45.4006	1068.57	75.1673
FC-1	41.0015	11.4557	2.46108e+06	188858	435337	1.33143e+06	1.48396e+07	1.96973	2.05587	0.187412	1.475	13.113	1.43212	55153.7	134.195	0.0539022	2.94685	0.326969	2.93775	1107.34	15.0074	1101.92	28.6411	1060.6	30.448
FC-1	28.3211	3.85882	1.58296e+06	121418	236129	732511	9.56982e+06	1.96225	2.69207	0.186911	1.53293	13.1278	2.213	46004.7	113.083	0.0530699	3.09705	0.322355	3.08253	1104.62	15.5617	1099.67	44.2745	1044.64	31.5307
FC-1	20.4473	18.8737	2.37341e+06	181162	425395	1.27338e+06	1.44843e+07	1.93634	2.26215	0.185174	1.54244	13.1799	1.65476	59884.1	123.174	0.0550883	2.93984	0.334068	2.93317	1095.18	15.5355	1091.71	33.1073	1083.32	31.009
FC-1	31.2776	28.3121	1.81878e+06	138683	286591	860535	1.09432e+07	1.95916	2.81867	0.187797	1.77334	13.2109	2.19093	42168.7	5580.62	0.0548206	4.87668	0.333038	4.79406	1109.43	18.0741	1087.02	43.8782	1078.2	51.2016
FC-1	43.729	28.4952	2.74264e+06	210542	619327	1.88176e+06	1.65332e+07	1.97159	2.47382	0.187463	1.68444	13.1042	1.81176	60578.3	95.5066	0.0543066	4.43544	0.329121	4.4335	1107.62	17.1423	1103.23	36.2479	1068.35	46.1549
FC-1	52.8083	21.4299	2.66415e+06	204660	500811	1.49004e+06	1.61266e+07	1.9643	2.47528	0.186686	1.76416	13.0983	1.73631	55936	468.066	0.055421	3.58556	0.336106	3.56284	1103.4	17.8909	1104.14	34.7267	1089.69	38.0365
FC-1	52.2589	0.189319	5.96811e+06	457850	1.66232e+06	5.05213e+06	3.64152e+07	1.95033	2.09206	0.185236	1.51903	13.0897	1.4385	143325	330.525	0.0543732	3.69928	0.329033	3.69816	1095.51	15.304	1105.48	28.7913	1069.63	38.5392
FC-1	32.9371	1.61706	1.24158e+06	96047.4	192281	570899	7.56923e+06	1.9605	3.64146	0.185333	2.45351	13.0286	2.69082	37007.9	67.1834	0.0553988	4.368	0.336804	4.36157	1096.04	24.7297	1114.79	53.7145	1089.27	46.3193
FC-1	53.6285	11.933	3.48703e+06	267907	613934	1.81975e+06	2.11943e+07	1.95895	3.34149	0.185942	2.34454	13.0818	2.38089	85301.6	218.121	0.0556793	3.53721	0.337372	3.53155	1099.36	23.6969	1106.69	47.6148	1094.63	37.6892
FC-1	42.8746	5.73346	4.59662e+06	352897	937164	2.90818e+06	2.76157e+07	1.98104	2.11071	0.188119	1.711	13.0874	1.23595	99579.4	80.2304	0.0532125	3.95615	0.322252	3.95538	1111.18	17.4639	1105.82	24.7046	1047.37	40.38
FC-1	59.1714	2.43751	2.05686e+06	159108	314340	912995	1.26439e+07	1.9477	1.98291	0.183831	1.24546	13.008	1.54298	55279	117898	0.0567302	4.36623	0.344296	4.30408	1087.87	12.4675	1117.99	30.7715	1114.74	47.3535
FC-1	53.3882	1.36203	2.37373e+06	181609	429483	1.26027e+06	1.45364e+07	1.93399	2.14872	0.184534	1.57719	13.1503	1.45926	58251.8	1704.81	0.0561931	5.34205	0.340786	5.31696	1091.7	15.8392	1096.22	29.2078	1104.47	57.4173
FC-1	66.9384	48.4436	1.13361e+06	87640.5	170408	502580	6.87899e+06	1.95266	3.08275	0.186071	1.42573	13.133	2.73325	14977.5	1352.14	0.0553016	7.83274	0.339067	7.47218	1100.06	14.4186	1098.85	54.6521	1087.41	82.9221
FC-1	18.1165	10.0654	2.14954e+06	163660	299312	898369	1.30777e+07	1.93581	2.15216	0.185733	1.40849	13.2233	1.62725	48226.4	100.058	0.0548453	3.01871	0.333173	3.00601	1098.22	14.2224	1085.15	32.5873	1078.67	31.7078
FC-1	12.8064	11.7134	1.32211e+06	100554	227570	666985	7.93696e+06	1.95505	2.71907	0.188192	1.55893	13.2665	2.2278	30869.4	131.233	0.0560969	4.58527	0.341193	4.56542	1111.58	15.917	1078.61	44.6745	1102.63	49.2034
FC-1	59.675	0.190635	1.20643e+06	93282	182949	540516	7.31062e+06	1.96766	2.84164	0.186426	1.62791	13.0578	2.32913	27425.2	65.1927	0.0555584	6.15575	0.33847	6.14757	1101.99	16.4898	1110.32	46.4973	1092.32	65.4551
FC-1	47.956	6.76748	1.62167e+06	123761	241865	746574	9.77065e+06	1.95812	2.69671	0.18754	1.66547	13.1998	2.12095	41923.4	285.976	0.0533117	6.58507	0.323967	6.56202	1108.03	16.9551	1088.69	42.4637	1049.28	67.332
FC-1	44.7743	7.82803	3.52994e+06	271592	506145	1.51126e+06	2.17465e+07	1.93591	2.18905	0.183455	1.57232	13.0604	1.52307	94187.8	408.7	0.0552609	7.44405	0.334916	7.43836	1085.82	15.7122	1109.93	30.392	1086.63	78.7523
FC-1	31.7735	9.56729	1.49708e+06	113990	203298	600479	9.14443e+06	1.9257	2.54389	0.184978	1.49081	13.2386	2.06128	36720	97.1563	0.0556424	8.48467	0.33856	8.47722	1094.11	15.002	1082.82	41.343	1093.93	90.3481
FC-1	20.4244	6.99494	4.64167e+06	355211	893867	2.50611e+06	2.84037e+07	1.93954	2.07036	0.184701	1.61604	13.1245	1.29415	126095	279.063	0.0589116	3.64665	0.356676	3.64399	1092.6	16.2417	1100.16	25.8829	1156.4	40.9855
FC-1	42.3977	8.82603	4.64567e+06	355283	807537	2.37871e+06	2.82559e+07	1.95025	2.0647	0.185828	1.63477	13.1321	1.26115	133570	173.237	0.056069	4.16796	0.339486	4.16641	1098.74	16.5145	1099.01	25.2178	1102.09	44.7043
FC-1	32.1054	56.4231	5.00032e+06	383602	1.35322e+06	3.94648e+06	3.04468e+07	1.9495	2.09616	0.185582	1.41611	13.1198	1.54549	51738	1040.44	0.0565819	3.44515	0.342893	3.42608	1097.4	14.2896	1100.86	30.9136	1111.9	37.2715
FC-1	14.8929	16.8206	1.8763e+06	142396	346745	1.05938e+06	1.14106e+07	1.93061	2.33193	0.185811	1.37423	13.2645	1.88398	49964.8	207.003	0.0539481	4.00023	0.327308	3.98775	1098.65	13.8814	1078.91	37.7738	1061.48	41.3654
FC-1	69.4827	1.81709	1.20036e+07	918672	3.24778e+06	9.58059e+06	7.26569e+07	1.96278	1.71595	0.186737	1.26365	13.1121	1.1609	301343	798.232	0.0560418	3.43094	0.338996	3.43044	1103.68	12.818	1102.06	23.2171	1101.57	36.7823
FC-1	50.4393	11.3387	4.28591e+06	326787	925008	2.81332e+06	2.60118e+07	1.94721	1.78827	0.186216	1.25424	13.1801	1.27468	91542.9	1253.71	0.0542908	3.29641	0.328796	3.28577	1100.85	12.6926	1091.68	25.5281	1068.05	34.2927
FC-1	45.8349	9.74645	2.42702e+06	185756	447377	1.32012e+06	1.48419e+07	1.93561	2.12195	0.184779	1.5207	13.1567	1.47991	45771.1	173.542	0.0558397	3.52802	0.338892	3.51425	1093.03	15.289	1095.27	29.5891	1097.7	37.6939
FC-1	49.1309	26.3259	7.74875e+06	592316	1.42472e+06	4.05935e+06	4.71613e+07	1.94786	1.71021	0.185701	1.29159	13.1392	1.12099	126798	216.595	0.0579666	3.95192	0.350973	3.94986	1098.05	13.0402	1097.89	22.4126	1138.36	43.743
FC-1	28.3211	22.545	2.51265e+06	190700	481659	1.4177e+06	1.5367e+07	1.92025	2.24612	0.184769	1.51452	13.2612	1.6587	52550.3	46795.7	0.0560141	3.69333	0.339747	3.64201	1092.98	15.2261	1079.37	33.2596	1101.04	39.5768
FC-1	20.8135	7.53015	1.49439e+06	115480	237947	727411	9.06461e+06	1.97084	2.51009	0.186291	1.4616	13.0272	2.04066	48686.2	28878.6	0.0538816	3.62792	0.327115	3.53984	1101.25	14.7961	1115.01	40.6948	1060.2	37.4715
FC-1	58.4695	16.4225	1.79313e+06	136772	275569	840782	1.07317e+07	1.97097	2.42601	0.188804	1.70132	13.2021	1.72946	45696.5	251.478	0.0539644	3.60586	0.327753	3.57608	1114.89	17.4182	1088.35	34.6227	1061.79	37.2979
FC-1	52.7931	35.4658	3.67877e+06	280255	654157	1.92214e+06	2.24969e+07	1.93013	2.20405	0.184805	1.61405	13.1959	1.5009	78255.9	171.203	0.0561576	3.43626	0.340327	3.43112	1093.17	16.2294	1089.3	30.0705	1103.79	36.9115
FC-1	53.7849	6.14037	4.52326e+06	346286	1.04597e+06	3.06896e+06	2.72249e+07	1.97225	2.14409	0.187778	1.49063	13.1218	1.54115	111537	2701.51	0.0562971	4.03443	0.340821	4.02832	1109.33	15.1914	1100.58	30.8484	1106.45	43.4387
FC-1	64.2221	17.1269	3.65754e+06	280652	711420	2.06908e+06	2.21107e+07	1.96691	2.26077	0.186949	1.6443	13.0994	1.55157	82383.1	165.916	0.0567532	3.55457	0.343835	3.55085	1104.83	16.6952	1103.98	31.0513	1115.18	38.5655
FC-1	9.7011	0.37772	2.36918e+06	181594	423218	1.27249e+06	1.44004e+07	1.9517	2.24272	0.185916	1.52208	13.1285	1.64714	55052.4	163.213	0.0548303	4.39983	0.332591	4.39213	1099.21	15.3822	1099.53	32.9905	1078.38	46.2028
FC-1	19.7722	12.9892	1.91991e+06	146940	313528	956254	1.15772e+07	1.96124	2.43611	0.187376	1.45755	13.1673	1.95197	38394.3	232.689	0.0539549	4.2285	0.327871	4.19972	1107.14	14.8274	1093.67	39.047	1061.61	43.731
FC-1	34.5774	8.26607	1.75498e+06	133841	275700	809807	1.06852e+07	1.93688	2.25781	0.18559	1.38887	13.2057	1.7801	44400.3	335.578	0.0560532	4.34911	0.340451	4.31699	1097.44	14.0152	1087.82	35.6546	1101.79	46.6348
FC-1	43.916	7.71675	2.43725e+06	186171	518685	1.62464e+06	1.4605e+07	1.97397	2.13616	0.188587	1.44753	13.1669	1.57094	65079.9	395.136	0.0526811	4.17975	0.319261	4.17025	1113.71	14.8056	1093.72	31.4571	1037.18	42.2574
FC-1	39.7884	13.5626	1.81773e+06	139754	240737	697658	1.10644e+07	1.95037	2.41527	0.185615	1.57873	13.1162	1.82787	33600.8	236.338	0.0566685	4.37284	0.345064	4.31948	1097.58	15.933	1101.4	36.5958	1113.56	47.3763
FC-1	60.1137	10.4247	4.68917e+06	358408	1.0441e+06	3.03635e+06	2.8553e+07	1.94602	1.87241	0.185608	1.33879	13.1451	1.30903	102324	522.236	0.0567908	4.33774	0.343865	4.33364	1097.54	13.5109	1097.03	26.1993	1115.9	47.0921
FC-1	8.81603	1.77182	2.73858e+06	211040	502000	1.47908e+06	1.66171e+07	1.96785	1.76575	0.186253	1.12039	13.0444	1.36477	79348.6	174.146	0.0560103	4.40125	0.339401	4.39751	1101.05	11.34	1112.37	27.278	1100.97	47.1598
FC-1	19.6195	1.15791	2.12862e+06	163506	374386	1.0681e+06	1.3027e+07	1.94278	1.95882	0.184651	1.31501	13.0991	1.4518	56487.3	2842.85	0.0577871	4.93589	0.350516	4.90184	1092.33	13.2133	1104.02	29.0525	1134.93	54.4745
FC-1	26.5282	9.17619	1.96196e+06	150000	370770	1.14874e+06	1.19798e+07	1.9372	2.93685	0.185064	2.04401	13.1661	2.10882	50347	151.662	0.0532044	2.69606	0.322764	2.68377	1094.58	20.577	1093.84	42.1872	1047.22	27.5143
FC-1	41.5433	0.386975	1.43076e+06	111212	219248	661025	8.80594e+06	1.94857	3.07893	0.183557	1.93953	12.9827	2.39124	29439.4	72.9735	0.0544752	3.62459	0.331679	3.60905	1086.38	19.3908	1121.85	47.7204	1071.58	37.8283
FC-1	46.7313	14.1084	2.46962e+06	191211	465266	1.36038e+06	1.5261e+07	1.93975	2.49038	0.182873	1.72321	12.9932	1.79793	59163.3	64.4404	0.0564043	4.37713	0.342012	4.37541	1082.65	17.1739	1120.25	35.8599	1108.5	47.2135
FC-1	52.7739	16.6719	2.53837e+06	195023	493803	1.45688e+06	1.55525e+07	1.94257	2.54299	0.184451	1.8544	13.0863	1.74011	73467.9	239.043	0.0559328	4.2724	0.338944	4.26674	1091.24	18.616	1105.99	34.7878	1099.49	45.719
FC-1	18.643	5.58322	3.13303e+06	239519	461699	1.2766e+06	1.93283e+07	1.92013	2.10872	0.183193	1.47477	13.1489	1.50723	79946.8	130.468	0.059654	3.63035	0.361662	3.62553	1084.39	14.7196	1096.42	30.1467	1170.55	41.2875
FC-1	42.2643	10.344	7.72217e+06	590479	1.63331e+06	5.14422e+06	4.70956e+07	1.94558	1.99722	0.18533	1.51016	13.1283	1.30702	192330	143.58	0.0524685	2.79149	0.317503	2.79089	1096.03	15.2212	1099.55	26.1292	1033.1	28.1139
FC-1	51.5532	6.84432	1.13358e+06	86198.9	150762	405313	7.00759e+06	1.89985	3.17454	0.18277	1.65248	13.2587	2.71053	35408.2	630.283	0.0611094	4.18009	0.371964	4.06687	1082.09	16.4611	1079.76	54.3677	1198.28	48.6327
FC-1	43.1301	12.9314	1.10647e+06	84984.3	159313	463206	6.70608e+06	1.95304	3.00468	0.186385	1.68551	13.1526	2.4874	25488.4	209.827	0.0563989	4.08652	0.343935	4.00636	1101.76	17.0701	1095.85	49.7936	1108.4	44.0749
FC-1	41.5051	4.58001	3.50015e+06	269863	616238	1.86725e+06	2.11349e+07	1.97823	2.86712	0.187161	2.02163	13.0392	2.03307	75977.8	1027.23	0.0544527	3.73083	0.330024	3.71175	1105.98	20.546	1113.17	40.5939	1071.15	38.9218
FC-1	22.4615	0.913237	5.67733e+06	435092	1.22072e+06	3.87195e+06	3.46368e+07	1.94861	2.75994	0.18526	2.00316	13.1029	1.89859	146558	119.112	0.0520883	3.43371	0.315272	3.43308	1095.64	20.1838	1103.45	37.9623	1025.8	34.3437
FC-1	23.9723	6.5195	1.76748e+06	136101	295776	837040	1.07508e+07	1.95842	2.46404	0.185777	1.5528	13.0737	1.91318	48555.2	102.5	0.0582153	4.37887	0.353359	4.37288	1098.46	15.6828	1107.9	38.1929	1143.11	48.6653
FC-1	39.9028	12.9283	5.07808e+06	389683	1.09032e+06	3.29065e+06	3.09576e+07	1.95208	1.98174	0.185394	1.42318	13.0892	1.37908	120297	148.464	0.0547308	3.53896	0.331338	3.53772	1096.38	14.3487	1105.57	27.6033	1076.48	37.0988
FC-1	9.17835	2.65875	1.51606e+06	116347	272054	823864	9.2465e+06	1.94602	2.54732	0.18527	1.59849	13.1211	1.98335	45846.8	51.3753	0.0544051	4.20852	0.330217	4.20627	1095.7	16.107	1100.66	39.691	1070.24	43.8689
FC-1	57.3366	3.93316	3.14146e+06	241598	581529	1.7131e+06	1.91278e+07	1.95532	2.03516	0.185595	1.40468	13.0816	1.47267	58599.1	328.032	0.0559792	4.28959	0.33946	4.27674	1097.47	14.1751	1106.72	29.4693	1100.37	45.939
FC-1	60.1251	43.7097	1.03873e+07	796287	2.46249e+06	7.46287e+06	6.27975e+07	1.9674	2.37394	0.186956	1.83388	13.0966	1.50748	170590	122.637	0.0545279	4.26265	0.329966	4.26233	1104.87	18.6207	1104.41	30.1721	1072.59	44.5282
FC-1	33.9403	19.7225	935442	71364.2	138626	384593	5.67886e+06	1.93305	3.65537	0.186051	1.61331	13.2648	3.28009	20760	136.414	0.0590092	4.71907	0.360448	4.65294	1099.95	16.3142	1078.83	65.7899	1158.26	53.1217
FC-1	40.54	14.001	5.07786e+06	390089	1.13234e+06	3.31352e+06	3.09774e+07	1.95226	1.73037	0.185263	1.25103	13.0786	1.19545	101621	66.2421	0.0564382	3.88226	0.341732	3.88179	1095.66	12.6055	1107.17	23.8884	1109.15	41.8995
FC-1	13.6226	15.2827	4.65591e+06	358645	1.0728e+06	3.20367e+06	2.84016e+07	1.95769	1.72244	0.185274	1.2364	13.0432	1.19921	101553	212.664	0.0553065	3.64641	0.334865	3.64423	1095.72	12.4587	1112.56	23.9737	1087.5	38.6062
FC-1	3.90256	9.01242	2.5119e+06	190889	482010	1.41422e+06	1.53471e+07	1.92542	2.29091	0.18496	1.64522	13.2393	1.59421	58485.3	105.913	0.0562107	3.67703	0.340831	3.67302	1094.01	16.5545	1082.7	31.9441	1104.8	39.533
FC-1	28.4394	5.16714	2.42164e+06	185832	443032	1.33121e+06	1.46602e+07	1.96022	2.16997	0.186652	1.41562	13.1232	1.64463	44831.7	221.709	0.054831	3.12692	0.332805	3.10516	1103.21	14.3541	1100.34	32.937	1078.39	32.8363
FC-1	4.90966	8.28185	1.36375e+06	103767	199476	561939	8.33308e+06	1.92142	2.74145	0.184891	1.42546	13.2619	2.34172	30343.4	99.0183	0.0582953	4.8275	0.354977	4.80948	1093.64	14.3387	1079.29	46.9537	1144.64	53.721
FC-1	11.5015	10.296	1.1286e+06	85699.8	161023	444495	6.84637e+06	1.93133	3.15672	0.186236	1.46496	13.2898	2.7962	30092.1	480	0.0594773	5.48596	0.36226	5.39861	1100.95	14.8265	1075.08	56.1391	1167.19	62.2168
FC-1	34.5583	15.3272	2.66846e+06	203438	529188	1.57244e+06	1.62562e+07	1.93856	1.97253	0.18551	1.29522	13.1887	1.48772	72553.4	591.143	0.0555369	3.22769	0.33654	3.21263	1097.01	13.0654	1090.38	29.8038	1091.91	34.308
FC-1	3.42948	15.5103	3.34034e+06	254557	575159	1.75808e+06	2.057e+07	1.9184	2.17115	0.183531	1.66409	13.1851	1.39452	98466.1	203.298	0.0540053	3.92765	0.327152	3.92386	1086.24	16.6351	1090.92	27.899	1062.58	40.6556
FC-1	60.3082	13.169	2.26159e+06	172981	421855	1.22175e+06	1.40642e+07	1.9025	2.17567	0.181707	1.38438	13.1631	1.6784	47789.3	138.597	0.0569042	6.30608	0.345286	6.30082	1076.29	13.7226	1094.3	33.5915	1118.06	68.5905
FC-1	43.8283	7.52228	2.35112e+06	179260	413949	1.21026e+06	1.43629e+07	1.93305	2.22259	0.184993	1.41382	13.1894	1.71494	68736.8	485.622	0.0564204	6.87448	0.342034	6.86575	1094.19	14.2283	1090.27	34.3443	1108.81	74.1711
FC-1	41.7873	3.49619	1.70103e+06	129414	238870	687297	1.04071e+07	1.92461	3.34042	0.184705	2.66589	13.2266	2.01282	55383.3	100.131	0.0572482	4.35315	0.347549	4.34684	1092.63	26.7935	1084.65	40.3231	1124.64	47.6193
FC-1	16.3349	6.97526	1.57892e+06	120871	253636	753494	9.65635e+06	1.93486	3.45929	0.184755	2.77202	13.1601	2.06944	41015.6	514.722	0.0554066	5.7145	0.336613	5.67685	1092.9	27.8665	1094.75	41.396	1089.42	60.606
FC-1	28.5425	5.26803	2.47326e+06	188780	456749	1.31966e+06	1.50255e+07	1.94511	2.19034	0.186015	1.38477	13.18	1.69706	60068.6	201.7	0.0570795	6.54178	0.34611	6.53669	1099.75	14.0008	1091.69	33.9559	1121.41	71.3615
FC-1	17.5558	12.7755	1.30479e+07	998383	3.69155e+06	1.09811e+07	7.9553e+07	1.9479	1.92261	0.185386	1.39767	13.1166	1.3202	249460	81.6106	0.0555717	6.59728	0.336172	6.59724	1096.33	14.091	1101.34	26.4043	1092.58	70.1659
FC-1	24.0944	14.7867	4.63133e+06	355626	1.08398e+06	3.17183e+06	2.81823e+07	1.95681	2.37329	0.185733	1.70589	13.0814	1.64999	116884	315.247	0.056455	4.25696	0.341753	4.25495	1098.22	17.2255	1106.75	32.9969	1109.47	45.9564
FC-1	58.1529	0.870479	1.57262e+06	122007	272527	842444	9.55603e+06	1.96951	2.94101	0.185916	1.83892	13.0098	2.29519	28635	469.593	0.0531651	4.85365	0.323496	4.78193	1099.21	18.5842	1117.72	45.7922	1046.46	49.4986
FC-1	80.9005	19.1963	5.8696e+06	450779	1.06432e+06	3.08541e+06	3.57761e+07	1.95402	1.85325	0.18543	1.5004	13.0787	1.08781	120772	105.501	0.0569672	5.2593	0.344952	5.25856	1096.57	15.1297	1107.17	21.7467	1119.27	57.2646
FC-1	66.0686	0.396277	4.12134e+06	316877	866729	2.65823e+06	2.49501e+07	1.96844	2.01893	0.186685	1.60725	13.0707	1.22181	89495.4	1506.25	0.0538341	4.5997	0.326056	4.59083	1103.39	16.2996	1108.35	24.4331	1059.29	47.4689
FC-1	66.6333	17.6644	5.74154e+06	439481	864285	2.36102e+06	3.51979e+07	1.93626	2.00491	0.184365	1.55393	13.1228	1.26688	118006	505.437	0.0604338	3.91591	0.366064	3.90854	1090.78	15.5934	1100.41	25.3043	1185.42	45.0841
FC-1	43.3781	4.29751	4.4463e+06	340421	1.03988e+06	3.05835e+06	2.70994e+07	1.94874	2.4448	0.185445	2.0725	13.1151	1.29683	150711	116.936	0.056182	3.68261	0.340014	3.68215	1096.65	20.9	1101.57	25.9262	1104.25	39.5739
FC-1	19.9399	2.65946	2.40365e+06	184688	427456	1.27394e+06	1.4602e+07	1.95774	2.23453	0.186018	1.62295	13.0953	1.53595	56300.4	172.365	0.0553194	3.63317	0.335539	3.62401	1099.77	16.4093	1104.62	30.7193	1087.75	38.4746
FC-1	52.3505	2.65946	3.41012e+06	261720	803582	2.37277e+06	2.07932e+07	1.95059	2.08461	0.185348	1.45121	13.0959	1.49652	84972.5	118.397	0.0559221	3.31821	0.338668	3.31659	1096.12	14.6282	1104.51	29.9225	1099.28	35.5018
FC-1	45.8539	19.0117	2.11208e+06	160811	410726	1.2443e+06	1.27181e+07	1.9565	2.34712	0.187661	1.65843	13.2192	1.6609	52151.5	167.183	0.0544224	2.97534	0.330085	2.96418	1108.69	16.8926	1085.75	33.2975	1070.57	31.0238
FC-1	18.3873	2.89813	1.74324e+06	132009	280298	816101	1.05924e+07	1.92624	2.32922	0.185956	1.47666	13.305	1.80132	40714.1	447.705	0.056532	3.35116	0.34346	3.2942	1099.43	14.9259	1072.8	36.1443	1110.95	36.2245
FC-1	55.3031	12.858	5.64899e+06	433955	1.03821e+06	2.97122e+06	3.43659e+07	1.95892	2.0154	0.18579	1.46434	13.0712	1.38475	150038	286.946	0.0577224	3.75295	0.349423	3.75091	1098.53	14.7902	1108.27	27.6317	1133.7	41.3753
FC-1	36.2597	1.32216	1.33984e+06	103263	160596	417539	8.31773e+06	1.91575	2.60705	0.181985	1.48331	13.0921	2.14395	30259.8	85.4304	0.0630639	4.98988	0.384624	4.97014	1077.81	14.7222	1105.08	42.8596	1235.46	59.8008
FC-1	31.9452	9.64498	5.99849e+06	459481	1.29141e+06	3.89353e+06	3.6447e+07	1.95569	2.42564	0.186018	1.9702	13.109	1.41494	149357	206.167	0.0548003	3.80707	0.33168	3.80602	1099.77	19.9201	1102.54	28.3013	1077.81	39.9576
FC-1	34.6919	8.48276	2.19743e+06	168417	412007	1.24738e+06	1.33599e+07	1.95078	2.41284	0.185866	1.72209	13.1312	1.69003	53038.8	759.976	0.0544541	4.07963	0.330298	4.05195	1098.94	17.3996	1099.14	33.8302	1071.18	42.5617
FC-1	33.0171	10.6169	2.52755e+06	192837	476763	1.41058e+06	1.52973e+07	1.95238	1.82729	0.186725	1.17652	13.1811	1.39814	68120.4	646.197	0.0557621	4.62572	0.337992	4.61213	1103.61	11.9336	1091.52	28.0207	1096.22	49.3568
FC-1	15.8047	2.01075	3.25575e+06	249372	599596	1.74719e+06	1.97437e+07	1.95828	1.80473	0.186372	1.24997	13.1165	1.30178	106042	247.7	0.0566645	4.33263	0.343178	4.32952	1101.69	12.6584	1101.35	25.9987	1113.48	46.9376
FC-1	15.1409	0.243742	1.81595e+06	139298	285525	844388	1.07827e+07	1.99734	2.50813	0.190297	1.60449	13.1308	1.92777	42772.3	1814.17	0.0556645	3.36419	0.338145	3.26404	1122.99	16.5361	1099.18	38.6087	1094.35	35.8367
FC-1	31.0716	12.3907	1.41197e+06	109030	232215	674086	8.6055e+06	1.95678	2.53147	0.185381	1.52636	13.0567	2.01955	34693.1	61.9198	0.0566614	4.24321	0.344488	4.23726	1096.3	15.388	1110.48	40.339	1113.42	45.9665
FC-1	10.3038	7.9053	4.58621e+06	350693	831063	2.32406e+06	2.78718e+07	1.95035	2.02971	0.185968	1.45563	13.1413	1.41452	94116.5	78.9938	0.0590307	3.99867	0.357591	3.99761	1099.5	14.7142	1097.57	28.3079	1158.67	45.0277
FC-1	32.6433	4.60934	1.36399e+06	104124	199949	592743	8.37431e+06	1.92139	2.78636	0.184035	1.84735	13.2007	2.08593	38813.4	842.093	0.0554828	4.15678	0.337328	4.07015	1088.98	18.5099	1088.57	41.7629	1090.87	44.1427
FC-1	9.85756	23.464	2.88566e+06	220939	534986	1.5334e+06	1.75548e+07	1.94827	3.28771	0.185759	2.44877	13.1405	2.19376	58125.6	378.301	0.0575329	4.51355	0.348888	4.49843	1098.36	24.7298	1097.71	43.9025	1130.08	49.6061
FC-1	4.60825	6.98419	1.56449e+06	119116	252824	725157	9.50253e+06	1.93532	3.08966	0.186012	2.0612	13.2465	2.30163	33217.3	62.2059	0.0573259	4.05381	0.348648	4.04625	1099.74	20.8396	1081.6	46.1417	1126.12	44.4018
FC-1	29.3129	2.39334	2.85611e+06	219030	630625	1.87981e+06	1.73569e+07	1.95508	2.48731	0.185965	1.94411	13.1093	1.5515	76349.2	127.527	0.0553783	5.24455	0.335473	5.24293	1099.48	19.6517	1102.49	31.0447	1088.87	55.5948
FC-1	21.8054	4.93101	2.08281e+06	159479	402148	1.22623e+06	1.2706e+07	1.94147	2.78119	0.18523	1.76447	13.149	2.14981	47597.2	2281.46	0.054054	5.15995	0.327956	5.12342	1095.49	17.7763	1096.4	43.0294	1063.51	53.4572
FC-1	17.0064	7.79617	2.44004e+06	188259	436980	1.30171e+06	1.48625e+07	1.96098	2.29431	0.185527	1.53503	13.0391	1.70514	59265.1	74.5188	0.055355	3.67634	0.335696	3.67365	1097.1	15.4857	1113.19	34.0632	1088.43	38.9555
FC-1	13.5732	5.20454	2.16074e+06	166319	379903	1.16643e+06	1.30036e+07	1.97954	2.78265	0.187773	2.18092	13.0732	1.72822	54634.1	106.734	0.0536897	4.02973	0.325697	4.02456	1109.3	22.2259	1107.97	34.5711	1056.53	41.481
FC-1	49.5961	11.3582	7.6019e+06	582700	2.20566e+06	5.70582e+06	4.68224e+07	1.93112	2.09501	0.183507	1.56453	13.0965	1.39331	190122	181.25	0.0638939	3.90195	0.386564	3.90164	1086.11	15.6381	1104.43	27.8916	1251.23	47.3411
FC-1	61.6815	5.48779	3.01808e+06	231863	430771	1.26003e+06	1.84156e+07	1.9516	2.19191	0.185223	1.60173	13.0803	1.49631	92814.9	147.211	0.0564066	4.35807	0.341874	4.35434	1095.45	16.1362	1106.89	29.915	1108.55	47.0098
FC-1	54.3152	4.36632	1.85206e+06	141226	309764	809498	1.14033e+07	1.91471	2.34151	0.18352	1.67624	13.2097	1.6349	42684.5	101.872	0.0630091	3.30628	0.382661	3.29572	1086.17	16.7556	1087.2	32.7488	1234.42	39.5914
FC-1	55.597	1.98591	3.9257e+06	301367	731276	2.02856e+06	2.37471e+07	1.96651	1.86493	0.186829	1.33097	13.0936	1.30632	81686.3	796.979	0.0594961	3.87499	0.36049	3.86217	1104.17	13.5064	1104.85	26.1509	1167.54	43.9597
FC-1	25.6685	7.59736	4.73662e+06	363725	949540	2.6549e+06	2.86041e+07	1.97188	1.72423	0.187156	1.19998	13.0808	1.23815	117165	634.139	0.059071	4.94462	0.357656	4.94084	1105.95	12.1952	1106.84	24.7438	1159.44	55.7156
FC-1	45.0783	2.4736	3.52177e+06	268961	862623	2.6389e+06	2.12515e+07	1.96201	1.83226	0.187293	1.2845	13.1562	1.3066	100281	106.219	0.0539923	5.08414	0.326887	5.08353	1106.69	13.0622	1095.34	26.1351	1062.33	52.6147
FC-1	21.8232	0.456133	4.17046e+06	319583	958682	2.81286e+06	2.55393e+07	1.94034	1.77007	0.184559	1.25647	13.109	1.24677	112745	127.292	0.0562974	4.7909	0.340821	4.79014	1091.83	12.6197	1102.54	24.9227	1106.46	51.5839
FC-1	23.6543	5.03712	5.41942e+06	414704	1.10868e+06	3.46066e+06	3.23522e+07	1.98773	1.96872	0.189326	1.53444	13.127	1.23344	115980	89.9858	0.0529129	4.97073	0.320366	4.9702	1117.72	15.7463	1099.79	24.6766	1041.63	50.4643
FC-1	42.881	8.51619	9.4553e+06	723596	2.51934e+06	7.47422e+06	5.82307e+07	1.92883	1.71104	0.183535	1.27971	13.114	1.13578	267043	304.391	0.0557204	5.08269	0.33707	5.08246	1086.26	12.7929	1101.77	22.7139	1095.42	54.1943
FC-1	41.0498	19.4994	4.17959e+06	319965	860299	2.42942e+06	2.48402e+07	1.99689	2.08738	0.190165	1.62423	13.1247	1.31111	100390	405.668	0.0584759	5.13914	0.354117	5.13561	1122.27	16.7298	1100.13	26.2043	1148.08	57.3563
72719PK2C
FC-1	7.54949	3.0518	4.59482e+06	351314	824378	1.9384e+06	2.69776e+07	1.96606	2.00505	0.187177	1.37742	13.121	1.45703	104473	95.2532	0.056376	3.23216	0.425288	3.23074	1106.06	13.9998	1100.66	29.1459	1107.96	34.8468
FC-1	17.0714	7.3854	4.97444e+06	379802	873957	2.01757e+06	2.91905e+07	1.9638	1.959	0.187275	1.36383	13.143	1.40629	91398.6	52.8851	0.0574051	2.73383	0.433172	2.7329	1106.6	13.8678	1097.34	28.1424	1127.63	29.9831
FC-1	44.7212	20.3861	5.37526e+06	410243	882424	2.05852e+06	3.151e+07	1.96581	1.94938	0.187475	1.37519	13.1436	1.38164	110414	848.63	0.0568209	3.27426	0.428668	3.26322	1107.68	13.9958	1097.27	27.6518	1116.47	35.5643
FC-1	84.2732	22.5834	2.27222e+06	173518	468284	1.13151e+06	1.33552e+07	1.95756	2.18577	0.186944	1.41691	13.1616	1.66433	51101.3	232.683	0.0547896	3.13817	0.413856	3.12437	1104.8	14.386	1094.52	33.2903	1077.6	32.931
FC-1	41.7684	3.78377	871865	66349.8	99929.4	242629	5.1177e+06	1.94257	3.49171	0.187108	1.54739	13.2748	3.13012	21432.2	247.541	0.0539957	4.76216	0.411862	4.58299	1105.69	15.7225	1077.32	62.7957	1062.39	49.2855
FC-1	18.3302	2.0757	1.21413e+06	91475.3	175235	425518	7.09583e+06	1.93326	2.71178	0.187938	1.55168	13.3979	2.22397	23822.9	211.897	0.0541871	3.53409	0.411815	3.43612	1110.19	15.8249	1058.81	44.775	1066.06	36.6987
FC-1	6.50051	22.2714	3.54059e+06	271464	591934	1.38336e+06	2.07026e+07	1.9777	2.60165	0.187933	1.76352	13.0965	1.91273	68942.8	29.0164	0.0566628	3.53343	0.427896	3.53293	1110.17	17.985	1104.43	38.2471	1113.45	38.2783
FC-1	25.3609	16.0457	1.07257e+06	82353.5	125245	300257	6.23945e+06	1.97728	3.25384	0.188795	1.80434	13.1594	2.70773	20841.6	127.429	0.0546798	4.03437	0.417127	3.93978	1114.84	18.4723	1094.87	54.1903	1075.5	42.2549
FC-1	41.7455	17.0628	2.91031e+06	222482	562425	1.33273e+06	1.71084e+07	1.9614	2.05258	0.186931	1.30827	13.135	1.58161	69562.6	902.091	0.0559046	4.00699	0.422008	3.99035	1104.73	13.2823	1098.58	31.6127	1098.95	42.8584
FC-1	79.4665	8.3893	1.74199e+06	133140	349744	1.77297e+06	8.97564e+06					13.1775	2.09679	32680.9	99.1012	0.0260697	3.3559	0.197265	3.34377	1245.87	15.6134	1092.06	41.959	519.913	17.2252	rev discord
FC-1	47.6891	6.9499	2.54229e+06	193649	497896	1.16832e+06	1.49242e+07	1.95613	2.37593	0.187184	1.51099	13.1882	1.83357	59956.1	329.078	0.0564364	3.51836	0.426166	3.50476	1106.1	15.3579	1090.45	36.6959	1109.12	37.971
FC-1	15.0953	10.4454	1.2617e+06	95156.5	166042	449575	7.38602e+06	1.93697	2.7191	0.187667	1.63232	13.3529	2.17464	33691	175.969	0.0486963	3.547	0.369331	3.49449	1108.72	16.6271	1065.57	43.7303	960.561	33.2737
FC-1	48.9518	14.6136	1.08618e+06	83517	178265	454341	6.39247e+06	1.96381	2.97859	0.186665	1.21298	13.1001	2.72041	31841.6	366.176	0.0517878	3.20137	0.39236	3.1193	1103.28	12.3	1103.9	54.3913	1020.03	31.8442
FC-1	21.6681	10.7683	1.04808e+06	78261	138557	334075	6.15352e+06	1.90517	3.20424	0.187063	1.23606	13.5322	2.95623	21334.2	102.441	0.0544637	3.4551	0.414747	3.39067	1105.45	12.5566	1038.66	59.7265	1071.36	36.0522
FC-1	1.3657	10.6159	1.88019e+06	143771	402517	939087	1.10704e+07	1.95277	2.64226	0.186586	1.52293	13.1686	2.15922	33880.9	1029.26	0.056669	3.02696	0.428625	2.94654	1102.85	15.4376	1093.46	43.2024	1113.57	32.7951
FC-1	13.2832	3.11727	708356	53899.6	70865.8	178336	4.17118e+06	1.93019	4.36756	0.186467	1.61884	13.3142	4.05646	16217.6	330.31	0.0517533	6.05195	0.397373	5.54442	1102.21	16.401	1071.41	81.5049	1019.37	60.161
FC-1	39.903	0.188928	2.53272e+06	193942	499520	1.19103e+06	1.4853e+07	1.96682	2.21991	0.18736	1.4502	13.1288	1.68075	47813	93.7009	0.0555047	3.42323	0.419403	3.41803	1107.06	14.7517	1099.5	33.6266	1091.29	36.3665
FC-1	77.0746	17.5726	2.96031e+06	226276	580020	1.39266e+06	1.736e+07	1.96365	2.13004	0.187369	1.41078	13.1506	1.59586	49697.5	110.957	0.0551243	4.07923	0.416485	4.07411	1107.11	14.3512	1096.18	31.9077	1084.01	43.054
FC-1	65.7255	9.19878	1.88619e+06	144302	402149	957105	1.09963e+07	1.97645	2.37548	0.188468	1.54709	13.1421	1.80261	46740.2	385.156	0.0556165	3.56616	0.420172	3.54461	1113.07	15.8156	1097.48	36.0501	1093.43	37.9571
FC-1	73.2331	6.18235	1.15956e+06	92530.3	242381	600486	6.83088e+06	2.02784	3.19376	0.186416	1.55408	12.6695	2.79015	18729.3	648.793	0.0531701	4.23104	0.403641	4.0703	1101.93	15.7412	1170.35	55.2585	1046.56	43.153
FC-1	33.9137	2.90194	1.67142e+06	129213	279696	666548	9.69485e+06	2.00556	3.34425	0.189413	2.1701	13.0163	2.54453	38294	174.697	0.0554471	3.7012	0.419619	3.67822	1118.2	22.278	1116.72	50.8146	1090.19	39.2807
FC-1	31.7164	14.2547	3.15244e+06	241592	620309	1.42667e+06	1.85392e+07	1.96473	3.12786	0.18685	2.14341	13.107	2.27801	61225.8	196.181	0.0575831	3.6657	0.434795	3.65822	1104.29	21.7531	1102.83	45.5911	1131.03	40.3211
FC-1	77.1319	1.96529	3.09564e+06	236603	603192	1.45127e+06	1.81988e+07	1.96189	1.83001	0.186929	1.20776	13.1315	1.37487	83858.4	160.456	0.0550824	3.1603	0.415631	3.15651	1104.72	12.2617	1099.07	27.4947	1083.21	33.3311
FC-1	45.6368	6.17679	3.83741e+06	293335	663079	1.49722e+06	2.26277e+07	1.9562	1.76659	0.186366	1.21893	13.1301	1.27869	83371.6	330.301	0.0586776	3.82636	0.442872	3.81807	1101.66	12.3437	1099.31	25.5667	1151.93	42.8439
FC-1	23.2245	9.17528	3.78214e+06	288969	358131	828716	2.2031e+07	1.97973	1.85475	0.188662	1.27952	13.1338	1.34274	91520.6	108.537	0.0571754	3.65727	0.432152	3.65024	1114.12	13.0916	1098.73	26.8464	1123.25	39.959
FC-1	32.014	2.90989	2.45568e+06	187754	407855	927638	1.44644e+07	1.95698	2.00329	0.186556	1.27217	13.1382	1.5475	60732.3	1242.61	0.0581996	3.39404	0.439671	3.35439	1102.69	12.8939	1098.06	30.9409	1142.81	37.7107
FC-1	42.1843	4.9765	2.4184e+06	184978	403112	933824	1.42486e+07	1.95659	2.53682	0.186501	1.67353	13.137	1.90651	55147.9	514.199	0.0571244	3.84917	0.431678	3.82067	1102.39	16.9576	1098.24	38.1533	1122.27	42.0201
FC-1	59.0304	21.6394	2.02733e+06	154886	425777	983749	1.19383e+07	1.9533	2.509	0.186581	1.62192	13.1647	1.91427	43096.3	544.214	0.0572712	3.29988	0.43281	3.26465	1102.82	16.4406	1094.06	38.2903	1125.08	36.1113
FC-1	33.4217	4.29184	3.67271e+06	280269	423417	980933	2.16868e+07	1.94881	1.87973	0.186097	1.23472	13.1608	1.41734	64859.9	1976.64	0.0570758	3.66435	0.431647	3.58806	1100.19	12.4884	1094.65	28.3389	1121.34	39.9703
FC-1	59.9728	4.84116	5.80163e+06	443657	1.30279e+06	2.98982e+06	3.40661e+07	1.96705	1.7715	0.187167	1.24713	13.1137	1.25812	134793	105.968	0.0577981	3.70897	0.435741	3.70842	1106.01	12.675	1101.82	25.126	1135.14	40.941
FC-1	57.0468	0.808118	3.06612e+06	235331	499981	1.15355e+06	1.80714e+07	1.96426	1.88349	0.186446	1.27294	13.0818	1.38822	70923.4	74.6304	0.0573959	3.19877	0.433429	3.19614	1102.09	12.8953	1106.7	27.7795	1127.46	35.0769
FC-1	49.173	1.75541	2.85284e+06	219006	472162	1.0956e+06	1.66963e+07	1.97867	2.09562	0.187765	1.3837	13.0784	1.57385	72463.6	2869.14	0.0570747	3.48023	0.430961	3.44733	1109.26	14.1009	1107.2	31.4699	1121.32	37.9613
FC-1	51.4734	2.73422	3.25815e+06	248424	522445	1.21052e+06	1.9238e+07	1.94722	2.04349	0.186105	1.32734	13.1721	1.55372	64572.7	492.356	0.0571338	3.70502	0.431586	3.68263	1100.24	13.4257	1092.9	31.1145	1122.45	40.4528
FC-1	76.3765	20.862	5.29401e+06	405826	1.06607e+06	2.46866e+06	3.11588e+07	1.9662	1.90671	0.186719	1.32798	13.0879	1.36821	100223	148.761	0.0572512	3.21169	0.43184	3.2095	1103.57	13.4695	1105.72	27.3852	1124.69	35.1346
FC-1	5.51991	18.5262	918724	70801.5	128474	302077	5.40864e+06	1.95828	3.38188	0.186532	1.37053	13.1278	3.09172	18147.5	323.352	0.0557805	4.19016	0.425302	3.94618	1102.56	13.8893	1099.67	61.819	1096.57	44.7233
FC-1	57.1041	0.581589	3.58982e+06	275238	697767	1.64755e+06	2.12503e+07	1.95417	2.03204	0.18564	1.35849	13.0924	1.51119	77977.8	145.368	0.0561191	3.29834	0.423517	3.29458	1097.71	13.7118	1105.03	30.2313	1103.05	35.4069
FC-1	36.2904	3.48445	3.16579e+06	241708	604760	1.43524e+06	1.86391e+07	1.95713	1.88231	0.186651	1.23705	13.1439	1.41874	88909.1	1425.57	0.0558465	3.7346	0.421367	3.72135	1103.21	12.5433	1097.21	28.3921	1097.84	39.9057
FC-1	42.5162	8.9777	1.24959e+06	95980.8	231665	541227	7.44574e+06	1.93227	2.78281	0.184327	1.2208	13.1472	2.50074	22221.8	50.721	0.0564057	3.41828	0.428036	3.40795	1090.57	12.2484	1096.69	50.0386	1108.53	36.8719
FC-1	38.3275	5.72126	6.11364e+06	466937	1.54165e+06	3.52273e+06	3.60811e+07	1.95467	1.91388	0.186218	1.34559	13.1298	1.361	136105	235.412	0.0580555	4.60243	0.437629	4.60154	1100.85	13.6172	1099.34	27.2246	1140.06	51.0173
FC-1	27.3408	1.14355	4.7169e+06	361751	845036	1.97495e+06	2.78366e+07	1.96216	1.95185	0.186222	1.37377	13.08	1.38653	109132	1962.85	0.0567231	3.59052	0.427878	3.57929	1100.88	13.9026	1106.93	27.7468	1114.6	38.936
FC-1	68.3349	1.0617	1.58073e+06	122305	286644	712108	9.29536e+06	1.97946	4.04032	0.186831	2.68578	13.0081	3.01841	36635.8	229.49	0.0531977	3.61512	0.402528	3.58767	1104.19	27.2552	1117.97	60.2152	1047.09	36.8893
FC-1	47.8263	13.8793	5.47971e+06	419307	1.26845e+06	2.82843e+06	3.22553e+07	1.96245	3.80911	0.186698	2.68832	13.1115	2.69856	100154	250.383	0.0594673	3.30436	0.448466	3.30142	1103.46	27.2646	1102.15	53.9502	1166.99	37.469
FC-1	30.7855	2.52434	1.06507e+06	82936	173810	399957	6.28437e+06	1.97939	3.07526	0.18615	1.47012	12.9612	2.7011	23432.7	149.199	0.0572337	3.82886	0.434572	3.7749	1100.49	14.8728	1125.16	53.798	1124.36	41.8741
FC-1	50.3785	11.3136	2.49663e+06	191493	494639	1.17579e+06	1.47064e+07	1.96382	2.12669	0.186551	1.37736	13.092	1.6204	67964.1	227.623	0.0557296	3.52842	0.420686	3.52122	1102.66	13.9597	1105.09	32.4152	1095.6	37.6278
FC-1	62.9369	8.61693	4.68079e+06	357860	832291	1.98964e+06	2.77155e+07	1.94851	2.25563	0.185596	1.60381	13.1274	1.58608	85128.7	754.299	0.0554294	3.33161	0.418313	3.31684	1097.47	16.1847	1099.74	31.7309	1089.85	35.3476
FC-1	57.6267	7.13042	2.4619e+06	187909	468500	1.12472e+06	1.44512e+07	1.95933	2.3022	0.18719	1.51524	13.167	1.73326	52493.7	178.163	0.0551369	3.0583	0.416546	3.04628	1106.14	15.4014	1093.7	34.67	1084.25	32.2856
FC-1	50.5501	4.13226	1.34123e+06	101545	223399	538793	7.86466e+06	1.94098	2.69218	0.187352	1.39328	13.303	2.30361	32889.7	147.045	0.0547423	3.13253	0.414629	3.10197	1107.01	14.1721	1073.1	46.2588	1076.7	32.8448
FC-1	43.775	17.6577	1.48239e+06	111032	211664	491129	8.76092e+06	1.90383	2.87465	0.185877	1.4125	13.4558	2.50369	29805.2	62.6073	0.0568071	4.1775	0.430975	4.16663	1099	14.2723	1050.12	50.5024	1116.21	45.3648
FC-1	15.6256	7.268	3.25629e+06	249732	722697	1.71394e+06	1.91962e+07	1.96228	1.86712	0.186406	1.16575	13.0921	1.45848	70721	1337.85	0.0558767	2.95902	0.421658	2.93988	1101.88	11.8073	1105.08	29.1933	1098.41	31.6345
FC-1	21.3021	18.001	3.0596e+06	234014	591392	1.42095e+06	1.80493e+07	1.9558	1.73829	0.186278	1.21793	13.1266	1.24028	73019.3	183.164	0.0551404	3.63354	0.416194	3.62851	1101.18	12.3286	1099.84	24.8127	1084.32	38.3606
FC-1	39.5368	28.7652	3.28408e+06	251114	620934	1.4702e+06	1.93632e+07	1.95542	1.86778	0.186371	1.24874	13.1356	1.38897	62887.1	496.004	0.0559325	3.46352	0.422347	3.44525	1101.69	12.6459	1098.48	27.7559	1099.48	37.063
FC-1	49.0586	26.5679	5.27052e+06	404467	1.0604e+06	2.53923e+06	3.11584e+07	1.95995	1.72706	0.185895	1.21384	13.0718	1.22855	108604	206.8	0.0553708	3.58217	0.417607	3.57972	1099.1	12.266	1108.19	24.5626	1088.73	37.9679
FC-1	40.525	10.7063	3.15176e+06	241122	608068	1.44901e+06	1.86031e+07	1.95431	2.12349	0.186169	1.53855	13.1288	1.46358	62770.8	319.137	0.0555771	3.77145	0.419643	3.75981	1100.59	15.5665	1099.49	29.2443	1092.68	40.1152
FC-1	33.0173	5.02989	1.08762e+06	82530.8	128535	291213	6.45156e+06	1.91948	3.1671	0.185176	1.41991	13.2958	2.83097	25269.9	6092.93	0.0579963	5.24342	0.441377	4.84752	1095.19	14.3015	1074.19	56.8528	1138.93	58.0666
FC-1	61.4949	3.96476	1.09753e+06	83351.9	173607	427745	6.44365e+06	1.93889	2.73401	0.187075	1.32274	13.2976	2.39273	22341.3	253.656	0.0534171	3.03873	0.405865	2.89452	1105.51	13.4378	1073.91	48.0166	1051.3	31.1291
FC-1	15.717	18.0641	3.14473e+06	240509	627710	1.49593e+06	1.84199e+07	1.96774	2.00359	0.187593	1.2955	13.139	1.52842	54266.4	389.417	0.0555564	3.44251	0.419614	3.42413	1108.32	13.1918	1097.93	30.5738	1092.28	36.6035
FC-1	44.4083	2.73725	1.851e+06	142687	287157	669438	1.09694e+07	1.95847	2.50102	0.185402	1.26995	13.0469	2.1546	42926.7	500.922	0.0566904	3.38468	0.428952	3.32425	1096.42	12.8043	1111.98	43.0256	1113.97	36.6838
FC-1	87.2563	20.7007	1.32781e+06	102005	212749	493908	7.86135e+06	1.94839	2.78571	0.185538	1.23589	13.124	2.49654	27474.6	526.75	0.0567908	3.37011	0.430747	3.22583	1097.16	12.4685	1100.24	49.9451	1115.9	36.5871
FC-1	57.2299	7.93537	1.76139e+06	135440	337378	816515	1.03685e+07	1.96509	2.18356	0.186636	1.22119	13.0896	1.81014	36606.2	118.349	0.0546205	4.04305	0.413192	4.0322	1103.13	12.3817	1105.5	36.1975	1074.36	42.3022
FC-1	43.4965	1.95249	2.47686e+06	189233	407436	973626	1.47002e+07	1.94056	2.07567	0.185145	1.28518	13.1491	1.62994	58996.4	14311.2	0.0553867	3.68913	0.418473	3.63497	1095.02	12.9426	1096.39	32.6267	1089.04	39.1122
FC-1	22.6828	15.6675	4.8571e+06	372152	904809	2.10058e+06	2.87262e+07	1.95616	2.05057	0.18582	1.45735	13.0918	1.44255	112115	126.52	0.0571087	4.11539	0.430742	4.11408	1098.69	14.7216	1105.13	28.8745	1121.97	44.9147
FC-1	29.4579	7.22105	1.03734e+06	79270.9	130883	309506	6.13003e+06	1.9353	3.61395	0.185838	1.85771	13.2342	3.09993	18991.7	787.561	0.0554217	5.3731	0.422876	4.97751	1098.79	18.7674	1083.46	62.1315	1089.7	56.9999
FC-1	42.7108	3.86574	3.02096e+06	231371	587803	1.38398e+06	1.785e+07	1.95432	1.95032	0.185971	1.38339	13.1148	1.37476	61895.6	202.115	0.0562487	3.99831	0.42472	3.99105	1099.51	13.9841	1101.65	27.4587	1105.53	43.0148
FC-1	5.72222	10.2746	1.26727e+06	97337.8	202690	469773	7.45584e+06	1.96025	2.44589	0.186708	1.24506	13.1269	2.10528	27248.7	527.044	0.0568813	4.41173	0.431463	4.3001	1103.52	12.6278	1099.79	42.1472	1117.62	47.9675
FC-1	56.4632	0.414243	1.98114e+06	152856	421671	973697	1.1699e+07	1.96793	2.30478	0.186065	1.35958	13.0307	1.86106	46724.2	1069.91	0.0573221	3.25379	0.433061	3.213	1100.02	13.7492	1114.47	37.1391	1126.05	35.6369
FC-1	50.9698	3.16087	2.82063e+06	215892	540474	1.29327e+06	1.66223e+07	1.95817	2.14454	0.186462	1.389	13.1236	1.63393	61040.9	125.451	0.0553428	3.98774	0.417912	3.9834	1102.18	14.0721	1100.29	32.7222	1088.19	42.2463
FC-1	1.15216	9.40674	1.5795e+06	119182	189516	420718	9.3528e+06	1.91918	2.44294	0.185559	1.30667	13.3253	2.06411	46888.6	1638.12	0.0594816	4.56255	0.45046	4.46006	1097.27	13.1839	1069.73	41.4427	1167.27	51.7478
FC-1	28.1457	12.5663	1.84075e+06	139684	318109	763691	1.0827e+07	1.94109	2.26837	0.186789	1.32613	13.2623	1.84035	37933.4	312.368	0.0550463	3.47359	0.416542	3.4322	1103.96	13.4549	1079.25	36.9323	1082.52	36.6125
FC-1	66.4999	2.47897	1.16542e+06	90165.1	234969	592121	6.91415e+06	1.95661	2.76447	0.185141	1.29066	13.041	2.44468	24631.1	259.456	0.0523607	4.05989	0.396825	4.00579	1095	12.9976	1112.89	48.8332	1031.03	40.8084
FC-1	44.5265	4.49317	1.81839e+06	141191	313436	721223	1.07255e+07	1.9815	2.17325	0.186272	1.35183	12.9558	1.70164	40522.2	254.13	0.057448	3.20331	0.43459	3.16954	1101.15	13.6837	1126	33.9484	1128.45	35.1569
FC-1	27.932	1.76875	3.87797e+06	296421	461899	1.29362e+06	2.21321e+07	2.02048	2.61866	0.192549	2.04936	13.1341	1.63018	74699.4	37.6663	0.0472448	7.09818	0.357058	7.09752	1135.17	21.3306	1098.7	32.5966	932.579	64.6916
FC-1	42.3979	1.16098	809277	61470.8	87747.4	201330	4.71977e+06	1.94286	3.7611	0.188252	1.62367	13.354	3.39258	14698.5	430.45	0.0567436	4.47582	0.435838	3.71934	1111.9	16.5824	1065.41	68.2634	1114.99	48.5529
FC-1	29.6374	8.93855	5.26047e+06	402277	1.23276e+06	2.93111e+06	3.12294e+07	1.94576	1.83035	0.185125	1.24543	13.1126	1.3413	142877	207.458	0.0557921	4.30161	0.420576	4.30075	1094.91	12.5412	1101.99	26.8019	1096.79	45.922
FC-1	47.5822	4.42839	3.0593e+06	234960	501634	1.19076e+06	1.81009e+07	1.95791	1.98183	0.185728	1.32257	13.0736	1.47596	70253.4	190.593	0.0557854	3.74588	0.421272	3.73807	1098.19	13.3545	1107.91	29.4916	1096.67	39.9848
FC-1	46.2547	8.34446	713988	55639.9	73717.1	181581	4.22545e+06	1.9656	4.39774	0.185521	1.40877	13.008	4.16599	15037.4	213.682	0.0528267	6.61782	0.405973	6.35546	1097.06	14.2115	1117.99	83.0911	1039.97	67.0821
FC-1	25.5631	24.0658	5.58413e+06	427903	1.30106e+06	2.86465e+06	3.26381e+07	1.97977	1.85327	0.188029	1.34083	13.0894	1.27936	117148	175.934	0.0602366	3.67222	0.454176	3.67094	1110.69	13.6801	1105.52	25.611	1181.66	42.1485
FC-1	62.4638	1.97682	2.53863e+06	193259	507584	1.23624e+06	1.49524e+07	1.94803	2.26744	0.186558	1.55258	13.1987	1.65251	56117.8	311.715	0.0543666	2.98045	0.410587	2.96362	1102.7	15.7361	1088.89	33.1128	1069.5	31.0469
FC-1	15.9535	8.0194	5.63806e+06	429939	1.36083e+06	3.21143e+06	3.32934e+07	1.95081	2.16837	0.186114	1.54261	13.1485	1.52387	153089	158.051	0.0562173	3.85593	0.423745	3.85533	1100.29	15.6036	1096.51	30.5015	1104.93	41.4611
FC-1	66.7326	7.62688	6.59279e+06	504164	1.70831e+06	4.3336e+06	3.90976e+07	1.94803	2.02153	0.185321	1.41951	13.1112	1.4393	154964	1132.18	0.0523014	4.02999	0.394202	4.02794	1095.98	14.3069	1102.21	28.7848	1029.89	40.4643
FC-1	65.817	0.0636795	4.70442e+06	360590	828875	1.9671e+06	2.7819e+07	1.95711	2.13369	0.185847	1.53047	13.0873	1.48671	109375	1245.87	0.0558591	3.87492	0.42137	3.86561	1098.84	15.4621	1105.83	29.7516	1098.08	41.4138
FC-1	41.0818	23.384	3.66265e+06	279034	385837	868614	2.16739e+07	1.9423	2.21286	0.185706	1.52701	13.1771	1.60156	76504.4	272.112	0.0587532	4.63308	0.444199	4.61454	1098.07	15.4173	1092.13	32.0407	1153.37	51.94
FC-1	30.0949	17.8907	3.80553e+06	290693	937113	2.18884e+06	2.23204e+07	1.96435	2.31245	0.187354	1.48433	13.1449	1.77318	70161.6	6903.47	0.056745	3.11478	0.428132	3.09534	1107.03	15.0985	1097.05	35.4848	1115.02	33.7894
FC-1	49.6841	2.46499	827202	64838.6	110115	256043	4.89436e+06	1.98155	3.2149	0.185593	1.66399	12.9083	2.75076	17648.6	143.38	0.0563489	4.85524	0.430065	4.75583	1097.46	16.7917	1133.3	54.7524	1107.45	52.3219
FC-1	51.6984	9.0569	1.98469e+06	152151	374914	947893	1.17506e+07	1.94912	1.97954	0.185572	1.18691	13.1216	1.58424	41445.6	93.6714	0.0523091	3.3277	0.395524	3.31979	1097.34	11.9763	1100.6	31.6897	1030.04	33.4174
FC-1	27.9169	14.5059	1.9634e+06	148489	412643	937143	1.16441e+07	1.9212	2.17845	0.185274	1.38385	13.2909	1.68244	50515.4	89.481	0.0582944	3.80556	0.44032	3.80218	1095.72	13.9445	1074.93	33.746	1144.62	42.3481
FC-1	40.0022	23.8444	5.88738e+06	449845	1.30731e+06	3.04838e+06	3.48391e+07	1.94941	2.11786	0.185712	1.66441	13.1295	1.30961	105401	205.41	0.0568676	3.65036	0.428855	3.6483	1098.11	16.8051	1099.41	26.1631	1117.36	39.6803
FC-1	54.014	2.72565	3.58486e+06	274455	677177	1.57468e+06	2.11408e+07	1.95874	2.16962	0.186344	1.52338	13.1114	1.54485	78581.3	80.2848	0.0569813	3.92106	0.430042	3.91959	1101.54	15.4252	1102.16	30.9185	1119.54	42.7035
FC-1	81.4807	4.73985	4.74202e+06	363096	845927	1.97814e+06	2.79575e+07	1.96059	2.23161	0.186401	1.57231	13.1031	1.58364	99614	272.342	0.0566821	3.52203	0.427637	3.51711	1101.85	15.9247	1103.4	31.6668	1113.82	38.1671
FC-1	20.1269	8.44154	1.15681e+06	89753.1	170085	381863	6.84106e+06	1.9687	3.0204	0.18574	1.32929	13.0028	2.71216	24866.3	2290.68	0.0586387	4.16088	0.445408	3.86801	1098.25	13.4231	1118.78	54.1457	1151.19	46.5604
FC-1	19.9438	5.2916	3.32255e+06	254891	673585	1.62969e+06	1.96296e+07	1.95851	2.05807	0.185999	1.40661	13.0888	1.50236	69393.8	223.755	0.0547595	3.877	0.413322	3.87096	1099.67	14.2206	1105.63	30.0672	1077.03	40.6628
FC-1	67.1254	7.05816	5.58396e+06	428625	1.16898e+06	2.78724e+06	3.31998e+07	1.94938	2.34846	0.184841	1.86376	13.0681	1.42887	110784	168.395	0.0556136	4.17107	0.419403	4.16955	1093.36	18.7433	1108.74	28.5087	1093.38	44.3934
FC-1	67.3086	4.11147	3.24011e+06	248754	630213	1.48294e+06	1.91137e+07	1.96361	2.10629	0.186285	1.48749	13.0748	1.49125	78649.4	137.854	0.0563136	3.55823	0.424976	3.55507	1101.22	15.0578	1107.76	29.7977	1106.77	38.3221
FC-1	39.1095	15.6877	1.37477e+06	104634	185817	394721	8.1624e+06	1.92511	2.53751	0.185018	1.2917	13.2456	2.18414	28121.3	1101.79	0.061996	5.0595	0.470757	4.87078	1094.33	13.0008	1081.78	43.7746	1215.16	59.6683
FC-1	28.672	4.63739	656888	50987.2	102269	253302	3.83967e+06	1.9803	4.88582	0.187817	1.43591	13.0712	4.67005	14096.1	208.599	0.0528509	3.9932	0.403745	3.78253	1109.54	14.6363	1108.27	93.2829	1040.44	40.495
FC-1	46.1402	0.269585	2.15888e+06	164968	423793	1.01101e+06	1.27574e+07	1.94864	2.42578	0.185945	1.52363	13.1512	1.88758	53379.4	172.986	0.0554934	3.43089	0.419179	3.42161	1099.37	15.3999	1096.08	37.7472	1091.08	36.4407
FC-1	63.1696	6.49529	1.1699e+06	90452.4	163510	379368	6.88684e+06	1.97475	3.22194	0.186624	1.88429	13.0247	2.61349	33056.8	362.294	0.0568443	4.24913	0.431007	4.17359	1103.06	19.1039	1115.39	52.1819	1116.92	46.1712
FC-1	19.6959	1.87761	2.48398e+06	190309	463452	1.13643e+06	1.46904e+07	1.95199	2.14461	0.185793	1.47021	13.1179	1.56135	51895.5	378.096	0.0539757	4.02182	0.407815	4.00185	1098.55	14.8497	1101.14	31.2571	1062.01	41.6089
FC-1	5.20724	14.4191	3.32521e+06	255674	555810	1.28144e+06	1.96408e+07	1.9627	2.04505	0.186037	1.50736	13.0634	1.38206	61672.8	123.092	0.0574183	2.4159	0.43374	2.407	1099.87	15.2418	1109.47	27.5827	1127.89	26.5019
FC-1	63.5624	13.863	4.0983e+06	313804	547482	1.24351e+06	2.43765e+07	1.94278	3.81193	0.18476	2.67748	13.1068	2.71329	86920.4	418.396	0.0583024	3.41197	0.44027	3.39407	1092.93	26.9168	1102.85	54.2483	1144.77	37.9731
FC-1	78.0283	3.79199	6.46038e+06	492714	1.72983e+06	3.99923e+06	3.84404e+07	1.93651	3.79364	0.184706	2.69055	13.1454	2.67443	166384	295.097	0.0573926	4.10838	0.432542	4.10765	1092.63	27.0415	1096.99	53.4902	1127.39	45.049
FC-1	49.3676	4.18723	3.64284e+06	279302	746991	1.75184e+06	2.15876e+07	1.95211	1.93852	0.185438	1.3932	13.092	1.34791	79045.1	60.2475	0.0565093	2.88376	0.426405	2.88271	1096.62	14.0492	1105.09	26.9831	1110.51	31.1602
FC-1	46.9872	6.75074	3.22549e+06	248277	658587	1.58424e+06	1.91477e+07	1.95515	1.95765	0.185106	1.33794	13.0483	1.4291	63098	284.503	0.055065	2.75083	0.415713	2.73814	1094.81	13.4715	1111.78	28.55	1082.88	29.0038
FC-1	65.9468	13.7083	2.03874e+06	156297	430603	1.00936e+06	1.20668e+07	1.95124	1.68926	0.185642	1.01902	13.1123	1.34729	49024.5	177.153	0.0564749	3.73078	0.426608	3.72163	1097.73	10.2855	1102.04	26.9186	1109.85	40.2894
FC-1	26.5779	1.2569	3.24724e+06	249110	601257	1.42783e+06	1.91694e+07	1.96029	1.55325	0.18615	1.06447	13.0874	1.13115	72589.4	179.92	0.0557841	3.30829	0.421099	3.30218	1100.49	10.7689	1105.81	22.6086	1096.64	35.3129
FC-1	75.1443	7.17465	2.22129e+06	169356	370272	884635	1.32358e+07	1.9263	2.06287	0.184393	1.3411	13.1927	1.56744	42548.5	366.516	0.0553326	3.55656	0.418559	3.51717	1090.93	13.4594	1089.79	31.4048	1088	37.6718
FC-1	38.8882	6.076	2.68416e+06	205438	439809	1.0112e+06	1.59737e+07	1.93818	2.35986	0.18464	1.96043	13.1294	1.31365	53950.5	105.232	0.0575478	3.89179	0.434938	3.88575	1092.27	19.6974	1099.42	26.2424	1130.36	42.7832
FC-1	59.2403	22.0123	3.06837e+06	234514	596038	1.43366e+06	1.82004e+07	1.94232	2.53389	0.18525	1.7954	13.1447	1.78805	58183.6	103.663	0.0550507	3.23839	0.415745	3.23394	1095.59	18.0895	1097.07	35.7533	1082.6	34.1361
FC-1	57.5922	22.7448	2.13316e+06	163216	423745	1.02397e+06	1.25847e+07	1.95142	2.57381	0.186227	1.7285	13.1524	1.90704	38046.2	63.7848	0.0547218	3.1351	0.413826	3.13029	1100.91	17.4929	1095.89	38.1377	1076.3	32.8601
FC-1	23.9685	7.314	1.48158e+06	112880	184119	439644	8.81108e+06	1.92855	2.32067	0.18475	1.26398	13.2027	1.94625	41955.3	184.756	0.0552757	4.44007	0.418792	4.41093	1092.87	12.7062	1088.26	38.9654	1086.91	46.9844
FC-1	33.8566	15.0046	5.43095e+06	415783	581703	1.41532e+06	3.15872e+07	1.98832	1.88101	0.188962	1.4433	13.0979	1.20628	141749	231.057	0.0544615	3.167	0.411005	3.16052	1115.75	14.787	1104.23	24.1539	1071.32	33.0447
FC-1	36.5764	1.32526	3.1033e+06	238353	620225	1.45491e+06	1.84431e+07	1.94857	1.72131	0.184896	1.19334	13.0775	1.2405	61961	248.569	0.0564616	3.56675	0.426298	3.55749	1093.67	12.0041	1107.35	24.788	1109.6	38.5094
FC-1	16.0679	13.5065	806922	61349.4	90120.6	211167	4.79903e+06	1.90783	3.07522	0.18461	1.36719	13.3361	2.75459	15157.9	197.715	0.055627	4.46269	0.426774	4.11453	1092.11	13.7349	1068.11	55.3721	1093.64	47.508
FC-1	51.4732	4.00841	2.54007e+06	195187	414799	963425	1.5077e+07	1.95247	2.12468	0.185131	1.47827	13.068	1.52611	67412.2	97.1119	0.0570063	3.28268	0.430546	3.27844	1094.95	14.8862	1108.77	30.4535	1120.01	35.7659
FC-1	54.22	9.90785	2.09998e+06	162692	405023	986930	1.24694e+07	1.965	2.25225	0.18504	1.38068	12.9782	1.77942	45702.8	817.423	0.0542989	3.30942	0.410387	3.26384	1094.45	13.8977	1122.55	35.4906	1068.2	34.4329
FC-1	46.8575	7.49725	1.19907e+06	92342.1	186483	440196	7.13377e+06	1.94243	2.59577	0.184627	1.56362	13.0997	2.07199	25151.8	406.627	0.0558034	4.53512	0.423636	4.42028	1092.2	15.7095	1103.95	41.4282	1097.01	48.4241
FC-1	26.3489	2.20751	2.0162e+06	155037	383659	929030	1.1944e+07	1.95413	1.79413	0.185468	1.12671	13.0806	1.39621	42108.5	245.672	0.0546211	3.17296	0.412968	3.1478	1096.77	11.3634	1106.87	27.9392	1074.37	33.1988
FC-1	42.7145	7.92423	6.29055e+06	480609	1.59484e+06	3.67205e+06	3.70409e+07	1.96036	1.95726	0.186646	1.39081	13.1219	1.37713	170243	220.619	0.0576272	4.32152	0.43432	4.32096	1103.18	14.1021	1100.58	27.5176	1131.88	47.5692
FC-1	18.5438	10.1215	1.91462e+06	145294	220701	525110	1.12855e+07	1.93749	2.36421	0.186397	1.4036	13.259	1.90247	39658.8	198.244	0.0554275	3.94209	0.420295	3.89216	1101.83	14.2158	1079.71	38.1604	1089.82	41.8233
FC-1	42.3408	12.0016	863609	67630.8	123069	267034	5.11714e+06	1.98342	3.45482	0.185377	1.62268	12.8812	3.05003	24943.5	3045.1	0.0606601	4.24996	0.460876	3.92317	1096.28	16.3587	1137.51	60.6467	1189.73	49.1029
FC-1	43.0732	2.66305	3.05533e+06	233569	532001	1.34437e+06	1.80351e+07	1.95325	2.0321	0.186162	1.46956	13.1354	1.40351	68437.9	191.123	0.0524071	3.37876	0.395724	3.37116	1100.55	14.8679	1098.51	28.045	1031.92	33.9906
FC-1	63.036	11.6584	1.21851e+06	93654.4	199163	445523	7.27325e+06	1.92782	3.28781	0.183986	1.79272	13.1532	2.75606	19603.7	10730.7	0.0587809	4.52781	0.447031	4.11057	1088.71	17.9585	1095.8	55.1351	1153.9	50.7825
FC-1	50.0351	5.18757	750624	56907.6	77020.6	188436	4.42084e+06	1.92284	4.05016	0.186436	1.80539	13.3628	3.62552	16289.4	255.115	0.0532635	9.08676	0.408735	8.73397	1102.04	18.2883	1064.08	72.923	1048.35	92.8319
FC-1	30.2667	11.6845	2.98974e+06	229841	595259	1.38454e+06	1.78587e+07	1.93978	2.00935	0.183954	1.58299	13.0698	1.2376	55742.6	58.7749	0.0569262	3.75269	0.429931	3.75096	1088.54	15.8551	1108.49	24.7427	1118.48	40.8324
FC-1	53.5218	10.769	2.94808e+06	225287	474287	1.10488e+06	1.75338e+07	1.93627	1.67703	0.184751	1.09124	13.1502	1.27343	53662	212.012	0.0567924	3.77461	0.429264	3.7592	1092.88	10.9698	1096.23	25.4878	1115.92	40.9796
FC-1	13.3366	0.543922	4.97989e+06	382277	945504	2.16547e+06	2.96976e+07	1.94348	3.25345	0.184284	2.40249	13.0683	2.19385	106525	307.785	0.0578862	3.60905	0.436628	3.60479	1090.34	24.0998	1108.71	43.8214	1136.82	39.8955
FC-1	13.7028	5.12165	3.18529e+06	243797	620810	1.46778e+06	1.88711e+07	1.94782	3.17268	0.185477	2.21668	13.1237	2.26985	61499	234.188	0.0560146	3.46757	0.422958	3.45799	1096.83	22.3573	1100.28	45.3865	1101.05	37.1579
FC-1	25.1892	15.0004	2.1506e+06	164957	250714	582235	1.27096e+07	1.95459	2.07855	0.18592	1.17752	13.1094	1.71284	45421.2	392.804	0.0568402	4.00235	0.430605	3.93634	1099.24	11.9003	1102.48	34.2678	1116.84	43.4868
FC-1	9.99099	20.3106	1.93147e+06	148520	413868	971528	1.14748e+07	1.9475	2.35606	0.18493	1.24138	13.087	2.00249	37985.6	401.687	0.0563478	3.81326	0.425997	3.78323	1093.85	12.4893	1105.88	40.0338	1107.42	41.0924
FC-1	3.85295	12.5395	1.94678e+06	150026	408083	960756	1.15607e+07	1.95271	2.44565	0.185011	1.45624	13.0578	1.96483	38181.4	433.847	0.0561794	3.59204	0.424752	3.55659	1094.29	14.6564	1110.32	39.2451	1104.2	38.599
FC-1	5.4857	3.93342	2.47601e+06	188274	500915	1.16954e+06	1.46936e+07	1.93164	2.18476	0.185166	1.44585	13.2113	1.6379	59738.3	348.437	0.0567232	3.33756	0.428299	3.32362	1095.13	14.562	1086.94	32.7915	1114.6	36.1929
FC-1	26.8335	15.0432	2.15434e+06	164693	420844	1.00001e+06	1.27539e+07	1.94411	2.24667	0.185591	1.35838	13.1567	1.78951	42850	1297.14	0.0556716	3.26954	0.42084	3.20835	1097.44	13.7076	1095.27	35.8244	1094.49	34.8327
FC-1	51.5534	22.3675	1.02787e+06	78959.1	201485	511080	6.06368e+06	1.9513	2.73344	0.186173	1.3044	13.1494	2.40213	21493.5	110.842	0.0519603	3.28474	0.394233	3.25136	1100.61	13.1977	1096.36	48.0822	1023.34	32.777
FC-1	42.8976	12.3097	2.50522e+06	191835	322845	756655	1.42117e+07	2.03152	2.08279	0.193676	1.30852	13.1391	1.62043	39809	193.668	0.0563114	3.63312	0.426674	3.59391	1141.26	13.6863	1097.91	32.39	1106.73	39.1272
FC-1	44.5456	9.37997	6.31141e+06	482831	1.67211e+06	3.69045e+06	3.76099e+07	1.93927	1.7342	0.184429	1.21668	13.107	1.23577	147439	1048.23	0.0601134	4.28087	0.453092	4.2789	1091.13	12.2128	1102.83	24.7125	1179.31	49.0396
FC-1	27.2721	4.6802	4.43411e+06	340004	800053	1.84502e+06	2.62803e+07	1.95324	2.16767	0.185423	1.56261	13.0834	1.50235	103825	1549.35	0.0574815	3.64944	0.433629	3.63812	1096.53	15.7565	1106.45	30.0644	1129.09	40.0753
FC-1	5.66493	6.51129	3.14609e+06	241353	600513	1.43336e+06	1.86723e+07	1.95057	2.22939	0.185159	1.60747	13.0826	1.54474	84430.2	1044.54	0.0555214	3.09398	0.418955	3.07818	1095.09	16.1893	1106.53	30.9021	1091.61	32.878
FC-1	63.8868	23.7506	5.80074e+06	443429	1.43879e+06	3.37176e+06	3.45375e+07	1.93862	1.88046	0.184579	1.44158	13.122	1.20747	112490	255.344	0.056596	3.90598	0.426716	3.90427	1091.94	14.4802	1100.55	24.1413	1112.17	42.2671
FC-1	8.03785	23.9337	5.43371e+06	415989	1.1117e+06	2.54369e+06	3.22372e+07	1.94825	1.85846	0.185237	1.40039	13.1037	1.22179	106440	541.203	0.0579473	3.41873	0.437042	3.4129	1095.52	14.1088	1103.32	24.4293	1137.99	37.8294
FC-1	61.2583	9.6858	3.12867e+06	239736	612273	1.47972e+06	1.86553e+07	1.93911	2.38425	0.1843	1.62602	13.0989	1.74376	81687.7	145.523	0.0548341	3.76849	0.413775	3.76561	1090.42	16.3121	1104.04	34.8726	1078.45	39.5757
FC-1	36.7214	6.20674	2.41345e+06	185599	297633	710018	1.42742e+07	1.96039	2.39191	0.185792	1.59921	13.0616	1.7787	61251.5	150.571	0.055431	3.2033	0.41919	3.18722	1098.54	16.1526	1109.75	35.5327	1089.88	33.9872
FC-1	66.3168	1.33364	2.21641e+06	170247	346415	821379	1.31446e+07	1.94945	2.23468	0.185259	1.46599	13.0973	1.68662	40445	456.411	0.0557243	3.54211	0.421748	3.48165	1095.64	14.7712	1104.31	33.7578	1095.5	37.7703
FC-1	77.4866	5.8076	2.99682e+06	229100	591056	1.46207e+06	1.78547e+07	1.93507	2.15428	0.18444	1.67946	13.1362	1.3492	66705.3	665.435	0.0535505	3.52284	0.404259	3.50553	1091.19	16.859	1098.39	26.959	1053.86	36.174
FC-1	46.9108	15.3506	4.35788e+06	334791	436613	1.0178e+06	2.56147e+07	1.97274	2.27725	0.186968	1.78031	13.062	1.41999	90879.1	187.668	0.0567649	3.65454	0.428975	3.64197	1104.93	18.0777	1109.68	28.3268	1115.4	39.6579
FC-1	38.6709	1.31232	1.84471e+06	141734	389621	929661	1.09373e+07	1.94998	2.50597	0.185304	1.49197	13.0968	2.01343	38488.1	242.319	0.0554353	3.21646	0.4191	3.19267	1095.89	15.036	1104.39	40.2531	1089.96	34.1293
FC-1	10.4221	31.291	910998	70389.5	172893	423168	5.38564e+06	1.95654	3.21215	0.185762	1.56037	13.0852	2.8077	19303	911.669	0.0537896	4.24103	0.408568	4.02011	1098.38	15.7582	1106.16	56.1151	1058.44	43.7331
FC-1	59.3128	14.8112	2.15071e+06	164704	451790	1.02858e+06	1.2734e+07	1.94673	2.41545	0.185563	1.54136	13.1371	1.85973	40320.3	263.479	0.0581075	3.57506	0.439235	3.55397	1097.3	15.5521	1098.22	37.2338	1141.05	39.6626
FC-1	36.4848	2.60163	3.17502e+06	242673	505978	1.14599e+06	1.88512e+07	1.94168	2.25005	0.185082	1.46968	13.137	1.70375	70309	107.803	0.0584621	3.29732	0.441519	3.2927	1094.68	14.7964	1098.23	34.0844	1147.82	36.7921
FC-1	21.4698	1.97609	1.73944e+06	133174	243101	603749	1.02605e+07	1.95501	2.66647	0.186271	1.55902	13.1313	2.16323	47528.7	84.3904	0.053214	3.58931	0.402652	3.58069	1101.14	15.7808	1099.13	43.2938	1047.4	36.6366
FC-1	27.4743	10.8073	4.09395e+06	312710	942122	2.25122e+06	2.4092e+07	1.95942	1.83131	0.186746	1.27997	13.1352	1.30973	99383.3	165.561	0.055492	3.1199	0.418495	3.11788	1103.73	12.9841	1098.54	26.197	1091.05	33.1369
FC-1	24.1783	2.93365	1.82504e+06	139182	390613	921026	1.08777e+07	1.92435	2.17314	0.184324	1.39134	13.2012	1.66935	35254.5	199.782	0.0560807	3.76274	0.424106	3.74369	1090.56	13.9593	1088.49	33.4534	1102.31	40.366
FC-1	49.6346	6.9406	1.64244e+06	126377	227530	541283	9.79386e+06	1.94033	3.19197	0.184238	2.31041	13.0863	2.20242	33845.4	114.689	0.0554443	4.03988	0.420352	4.01638	1090.09	23.1712	1106	44.059	1090.14	42.8732
FC-1	23.2666	10.2366	3.48891e+06	267167	448875	1.05635e+06	2.08264e+07	1.93557	2.63892	0.184096	1.95154	13.1083	1.77634	79281.8	403.053	0.0562502	3.61878	0.424931	3.59809	1089.31	19.5593	1102.64	35.5244	1105.56	38.9328
FC-1	52.0875	16.9893	3.30264e+06	251500	630775	1.55357e+06	1.96097e+07	1.93487	2.16086	0.185076	1.59108	13.1829	1.46213	76173.8	3646.1	0.0537954	3.696	0.406015	3.67405	1094.65	16.0182	1091.25	29.2853	1058.55	38.1167
FC-1	76.4413	4.17167	1.97895e+06	150454	361175	902092	1.17156e+07	1.93519	2.18724	0.185605	1.40096	13.2184	1.67969	53366.1	1348.2	0.052992	3.70349	0.400375	3.66363	1097.52	14.1382	1085.89	33.6733	1043.14	37.6523
FC-1	55.8946	16.1802	2.31815e+06	177666	462966	1.12431e+06	1.36679e+07	1.95871	2.13013	0.186361	1.3141	13.1128	1.67649	52365.4	3145.63	0.0545133	3.53607	0.411778	3.49286	1101.63	13.3071	1101.95	33.5593	1072.31	36.9289
FC-1	36.851	3.54574	6.69003e+06	512595	1.79488e+06	4.18207e+06	3.96641e+07	1.952	2.27786	0.185366	1.84124	13.0877	1.34106	137581	815.507	0.0569391	3.86234	0.429186	3.86013	1096.22	18.5613	1105.75	26.8423	1118.73	42.0346
FC-1	41.406	3.27367	1.89255e+06	145305	405618	952675	1.12477e+07	1.94446	1.92276	0.184867	1.1763	13.103	1.52096	40569.3	64.4212	0.0563312	3.92991	0.425768	3.92696	1093.51	11.8311	1103.41	30.4298	1107.11	42.3377
FC-1	45.2513	0.754726	3.09817e+06	238461	615914	1.46301e+06	1.84039e+07	1.95429	2.17184	0.184989	1.68248	13.0457	1.37338	69217.9	768.518	0.0557728	3.76004	0.420991	3.74405	1094.17	16.9317	1112.17	27.3997	1096.42	40.1272
FC-1	74.0457	15.4069	727293	56336.7	76761.9	181340	4.28715e+06	1.96504	3.98188	0.186287	1.9097	13.0654	3.49405	17438.4	222.882	0.055258	6.48956	0.423304	6.2809	1101.23	19.332	1109.16	69.7728	1086.57	68.651
FC-1	42.5505	10.4114	1.93049e+06	147961	414845	974215	1.14501e+07	1.94615	2.55807	0.185249	1.58884	13.1187	2.00483	46057.2	4534.77	0.0563634	3.78286	0.425825	3.73535	1095.59	16.0082	1101.02	40.121	1107.72	40.7754
FC-1	31.6554	35.7634	878498	67100.6	117551	281248	5.1943e+06	1.92632	3.53267	0.185677	1.26509	13.2844	3.29838	14239.8	240.72	0.0545921	4.47884	0.41796	4.15037	1097.92	12.7712	1075.9	66.2261	1073.82	46.8388
FC-1	23.5984	9.39573	1.90562e+06	144642	378725	909351	1.12584e+07	1.93305	2.15355	0.185963	1.32306	13.2586	1.6992	38219.8	675.695	0.0550736	3.33956	0.416478	3.28478	1099.47	13.3737	1079.78	34.0966	1083.04	35.2164
FC-1	66.6868	0.844863	3.06857e+06	234518	593436	1.41398e+06	1.83383e+07	1.92913	2.69201	0.18388	2.28241	13.1367	1.42742	73280.7	118.934	0.0556044	3.97825	0.419693	3.97547	1088.14	22.8528	1098.28	28.5642	1093.2	42.3345
FC-1	60.2779	0.478646	2.14187e+06	163398	250226	599159	1.2635e+07	1.94863	1.9375	0.186269	1.26516	13.1742	1.46741	52121	166.465	0.0551698	4.53369	0.417629	4.51444	1101.13	12.8062	1092.57	29.4043	1084.88	47.888
FC-1	28.8591	8.89037	2.48453e+06	189727	479665	1.16645e+06	1.46247e+07	1.95615	2.93852	0.186681	1.99089	13.1525	2.16131	63597.6	340.501	0.0544634	3.33032	0.411219	3.3169	1103.37	20.1898	1095.87	43.2653	1071.35	34.7499
FC-1	11.8298	10.5384	2.21292e+06	168227	378061	865271	1.31738e+07	1.92403	3.08641	0.184574	2.09576	13.2212	2.26577	51446.2	341.05	0.05781	4.02805	0.436928	4.00647	1091.92	21.0508	1085.44	45.3891	1135.37	44.4719
FC-1	36.645	4.31486	1.72123e+06	130488	349346	884715	1.02555e+07	1.91587	2.115	0.184405	1.28282	13.2654	1.68155	44596.4	85.1374	0.0522505	3.14355	0.394868	3.13822	1090.99	12.8753	1078.77	33.7461	1028.91	31.5345
FC-1	27.1232	17.4987	2.47577e+06	188486	296972	688708	1.46471e+07	1.93936	2.12463	0.185731	1.36479	13.199	1.62831	54604.7	63.9723	0.0569833	3.53452	0.431202	3.52866	1098.21	13.7811	1088.82	32.6305	1119.57	38.4951
FC-1	68.3501	3.94434	2.25845e+06	173803	265104	629454	1.33815e+07	1.95567	2.42554	0.185438	1.78789	13.0682	1.63911	43604	53.8874	0.0555828	3.68382	0.421165	3.67667	1096.62	18.0294	1108.74	32.7585	1092.79	39.1869
FC-1	10.6699	13.466	1.61906e+06	125962	285731	706166	9.4897e+06	1.99526	2.21772	0.187429	1.22348	12.9464	1.8497	31691.4	125.398	0.0534275	3.03437	0.404624	3.00939	1107.43	12.4493	1127.42	36.8893	1051.5	31.0902
FC-1	17.0484	7.12812	1.51989e+06	117320	257782	629259	8.99739e+06	1.96052	2.79416	0.18558	1.47145	13.0459	2.37533	33154.5	93.0177	0.0540939	3.01502	0.409659	2.99838	1097.39	14.8479	1112.15	47.4333	1064.27	31.2575
FC-1	8.58711	9.50853	2.14217e+06	165115	426548	1.02783e+06	1.27701e+07	1.94925	2.421	0.184328	1.56817	13.0328	1.84448	59464.4	103.753	0.0549589	3.4358	0.415	3.43204	1090.58	15.7337	1114.16	36.813	1080.85	36.1597
FC-1	55.8259	8.60766	4.9785e+06	381709	936574	2.08058e+06	2.95612e+07	1.94961	1.93338	0.185084	1.34822	13.0837	1.38574	108526	258.727	0.0596797	4.16726	0.45015	4.16419	1094.69	13.5736	1106.37	27.7339	1171.04	47.413
FC-1	28.3592	11.3543	1.97594e+06	152007	404092	957347	1.17239e+07	1.95175	2.46644	0.185175	1.60645	13.0758	1.87154	41454.4	404.417	0.0558402	3.79339	0.422095	3.7646	1095.18	16.1803	1107.59	37.3792	1097.71	40.5295
FC-1	5.89395	17.4461	2.8961e+06	222157	565423	1.36752e+06	1.71069e+07	1.95785	2.24618	0.186028	1.55095	13.0952	1.62476	60207.4	123.926	0.0547547	3.62768	0.413465	3.62307	1099.82	15.6819	1104.63	32.4921	1076.93	38.0447
FC-1	51.3055	13.6008	1.83516e+06	141369	341509	835147	1.08613e+07	1.95769	2.49336	0.185627	1.46705	13.0681	2.01609	35357.8	314.682	0.0540399	3.31332	0.40892	3.26869	1097.64	14.8066	1108.75	40.2991	1063.24	34.3175
FC-1	39.4376	1.60403	3.29347e+06	251666	654970	1.58326e+06	1.9296e+07	1.96692	1.89163	0.187558	1.29982	13.1419	1.37431	66896.3	233.177	0.0548007	3.33454	0.413685	3.32647	1108.13	13.2337	1097.5	27.5034	1077.82	34.9983
FC-1	44.5647	2.79058	1.37335e+06	105812	269637	627759	8.29287e+06	1.9189	2.64752	0.181937	1.50832	13.0671	2.17585	34657	390.545	0.0567713	4.32119	0.429524	4.28288	1077.55	14.9671	1108.89	43.4707	1115.52	46.8971
FC-1	34.4516	5.91951	2.97676e+06	226966	598906	1.41776e+06	1.77435e+07	1.92859	2.05538	0.18435	1.50265	13.1739	1.40236	61849	203.246	0.0559501	3.7074	0.422431	3.70013	1090.69	15.0778	1092.62	28.0866	1099.82	39.6846
FC-1	82.0606	4.15147	2.59005e+06	198083	506796	1.20144e+06	1.53453e+07	1.94661	2.00046	0.185472	1.25918	13.1315	1.55445	65637.9	70.1505	0.055874	3.52175	0.421823	3.52	1096.8	12.6997	1099.08	31.1018	1098.36	37.6487
FC-1	8.01496	18.9043	1.04257e+06	79202.7	134296	316599	6.20735e+06	1.91179	2.99	0.184466	1.96526	13.298	2.25341	21447	94.2763	0.0556896	4.58676	0.424184	4.54188	1091.33	19.7302	1073.85	45.2372	1094.83	48.8809
FC-1	63.1313	14.3266	3.00473e+06	229848	583495	1.36503e+06	1.78943e+07	1.9367	2.32023	0.184515	1.68104	13.1305	1.59924	62408.2	357.476	0.0566123	3.88515	0.427459	3.87271	1091.59	16.8806	1099.23	31.9987	1112.48	42.0531
FC-1	38.0261	13.0734	2.26849e+06	173586	475814	1.1256e+06	1.35548e+07	1.92756	2.05641	0.183874	1.3789	13.1469	1.52559	40795.1	118.223	0.0559247	3.19938	0.42272	3.19007	1088.1	13.806	1096.73	30.508	1099.33	34.2319
FC-1	12.3906	6.66457	2.4733e+06	189038	498258	1.18357e+06	1.47486e+07	1.93257	2.17251	0.184275	1.44627	13.1414	1.62114	62531.4	106.266	0.0557594	3.80704	0.420979	3.80393	1090.29	14.5071	1097.56	32.4223	1096.17	40.6196
FC-1	77.0975	5.46769	3.20649e+06	247108	655324	1.52881e+06	1.91793e+07	1.94361	2.67583	0.183719	1.99309	13.0274	1.7854	73270.5	125.161	0.056798	4.26358	0.428651	4.26121	1087.26	19.9412	1114.97	35.6478	1116.03	46.2925
FC-1	44.1375	12.0596	1.80531e+06	139374	314451	727732	1.07229e+07	1.95734	2.76736	0.184984	1.71711	13.0251	2.17021	44724.1	150.713	0.0571449	3.57775	0.432098	3.56431	1094.15	17.2798	1115.32	43.3171	1122.66	39.0705
FC-1	33.0058	22.9275	6.12216e+06	470429	1.56879e+06	3.59542e+06	3.63957e+07	1.95184	1.93443	0.184862	1.43364	13.0532	1.29872	117671	636.383	0.057876	4.14728	0.43633	4.14455	1093.48	14.4191	1111.03	25.9393	1136.63	45.8376
FC-1	22.5684	4.61664	3.14708e+06	240886	603482	1.41947e+06	1.86592e+07	1.94668	1.97558	0.185335	1.26453	13.1213	1.51785	64142.7	557.616	0.056308	3.33542	0.425145	3.31644	1096.06	12.7458	1100.63	30.3706	1106.66	35.9191
FC-1	36.1683	11.5838	1.79817e+06	137636	322391	755059	1.06559e+07	1.94332	2.26375	0.185397	1.38655	13.1483	1.78942	37534.6	162.21	0.0564317	3.86444	0.426974	3.84598	1096.39	13.9796	1096.53	35.7798	1109.03	41.7026
FC-1	26.6464	13.598	2.06576e+06	157985	395900	971136	1.21909e+07	1.95311	2.39809	0.186195	1.59122	13.1387	1.79412	55089.9	127.682	0.0539706	3.73804	0.407667	3.73234	1100.73	16.1013	1097.97	35.9392	1061.91	38.6694
FC-1	46.247	15.6113	6.36594e+06	486041	1.67715e+06	3.69097e+06	3.7929e+07	1.93556	1.75102	0.184456	1.27579	13.134	1.19935	138041	218.898	0.0602826	3.41735	0.454394	3.41637	1091.27	12.8077	1098.7	23.9804	1182.54	39.2514
FC-1	23.5411	37.4012	1.14408e+06	85815.4	174743	416443	6.75093e+06	1.89899	3.33774	0.186085	1.80543	13.5052	2.8073	16608.2	414.817	0.0550332	3.92433	0.419607	3.58455	1100.13	18.2597	1042.7	56.6827	1082.27	41.3542
FC-1	39.5864	0.0276046	2.58275e+06	197362	427492	1.00379e+06	1.53584e+07	1.93853	2.18776	0.184798	1.5006	13.1382	1.592	73710.4	854.747	0.0564037	3.92562	0.425877	3.90562	1093.13	15.0882	1098.04	31.8434	1108.49	42.3429
FC-1	56.4326	14.4932	6.54271e+06	499405	1.77672e+06	4.05958e+06	3.89423e+07	1.93738	1.9151	0.184647	1.43386	13.1354	1.26952	157665	827.383	0.05807	3.16366	0.43766	3.16163	1092.31	14.4072	1098.52	25.3829	1140.33	35.077
FC-1	27.0318	10.8227	2.29809e+06	176237	416646	965518	1.36304e+07	1.94701	2.30703	0.185247	1.50784	13.1128	1.74608	44707.1	4185.8	0.0570782	3.23475	0.431526	3.15225	1095.58	15.1921	1101.96	34.9191	1121.39	35.2857
FC-1	49.7376	11.5551	6.13323e+06	468768	1.5816e+06	3.62191e+06	3.65794e+07	1.93576	1.98452	0.184271	1.47494	13.1195	1.32773	143699	161.56	0.057933	4.08564	0.436676	4.08508	1090.26	14.7944	1100.9	26.5213	1137.72	45.1984
FC-1	46.4606	10.3314	3.19307e+06	244386	604631	1.43598e+06	1.9071e+07	1.93177	2.06641	0.183979	1.48712	13.1258	1.43475	58857.6	321.912	0.0557519	3.55668	0.421057	3.54213	1088.68	14.8967	1099.96	28.6718	1096.02	37.9435
FC-1	45.7282	1.35912	1.92888e+06	146593	323370	748719	1.13841e+07	1.93881	2.48928	0.186165	1.733	13.2335	1.78696	43741.9	179.165	0.0571043	3.38699	0.431898	3.36783	1100.57	17.5335	1083.58	35.7998	1121.89	36.9624
FC-1	58.523	2.20808	4.7486e+06	363949	855359	1.99492e+06	2.83435e+07	1.93833	2.11297	0.184117	1.75065	13.0912	1.18316	96946	608.473	0.0568304	3.68206	0.428769	3.67304	1089.43	17.5476	1105.26	23.6513	1116.65	40.0001
FC-1	31.6056	2.02497	972502	73475.6	152992	358158	5.7774e+06	1.90413	3.16918	0.184863	1.43078	13.3804	2.82782	20023.2	119.094	0.0561593	3.76685	0.427164	3.71139	1093.49	14.3904	1061.44	56.924	1103.82	40.4637
FC-1	67.5108	17.533	1.20587e+06	91094.5	165838	385742	7.17077e+06	1.90535	2.97672	0.184711	1.65122	13.3607	2.47676	24131.8	217.338	0.0565501	3.8681	0.429919	3.75978	1092.66	16.596	1064.39	49.8139	1111.29	41.8251
FC-1	55.2424	0.594726	2.57782e+06	196715	522483	1.22889e+06	1.52121e+07	1.94703	1.89699	0.186188	1.11202	13.1793	1.53688	43659	185.744	0.0562554	3.39296	0.425167	3.37876	1100.69	11.252	1091.8	30.7579	1105.66	36.5064
FC-1	38.7051	5.18524	2.74904e+06	211893	525636	1.17947e+06	1.62955e+07	1.9615	2.24036	0.185383	1.46129	13.0255	1.69818	72352.8	327.509	0.0590407	2.92615	0.445653	2.9146	1096.31	14.7322	1115.27	33.8667	1158.86	32.9557
FC-1	40.3531	9.57985	1.42615e+06	109899	285066	684570	8.51884e+06	1.93932	2.6882	0.183914	1.66666	13.07	2.10919	32302.4	179.858	0.0550254	3.36452	0.416416	3.33836	1088.32	16.6902	1108.45	42.1435	1082.12	35.4501
FC-1	43.9925	9.26067	3.06943e+06	235324	610769	1.46142e+06	1.83214e+07	1.93501	2.58096	0.18408	2.0075	13.111	1.62212	49648.7	565.809	0.0553178	3.82624	0.417928	3.80011	1089.23	20.1187	1102.23	32.4586	1087.72	40.518
FC-1	29.1603	8.89444	917192	70860	172153	421181	5.46612e+06	1.94242	3.46111	0.184286	1.54321	13.0756	3.09803	21181.6	478.339	0.0538479	3.96075	0.408738	3.81557	1090.35	15.4803	1107.62	61.9095	1059.56	40.8848
FC-1	21.4698	0.627213	2.01702e+06	154319	428210	989681	1.19428e+07	1.94695	2.20313	0.185575	1.33661	13.1364	1.75136	51645.6	656.344	0.0572876	3.34343	0.432675	3.31741	1097.36	13.4869	1098.36	35.0701	1125.39	36.5977
FC-1	21.6529	6.14781	3.45184e+06	264172	684503	1.65645e+06	2.01558e+07	1.97706	1.88563	0.188194	1.24921	13.1189	1.41246	72564	104.914	0.0547508	2.91923	0.413235	2.9162	1111.58	12.7548	1100.99	28.2443	1076.86	30.6129
FC-1	35.02	6.33092	1.54528e+06	118906	254811	605720	9.08954e+06	1.96833	2.28588	0.18678	1.27	13.0781	1.90061	37889.7	174.073	0.0555794	3.20984	0.420675	3.18007	1103.91	12.885	1107.23	37.963	1092.72	34.143
FC-1	40.5134	9.07754	1.74013e+06	132989	329972	784440	1.02624e+07	1.95095	2.34677	0.186303	1.62278	13.1609	1.69527	42621.2	75.3252	0.0556387	3.01037	0.420647	3.00482	1101.31	16.4286	1094.63	33.9068	1093.86	32.0535
73019PK1
FC-1	40.0211	5.48064	5.20161e+06	397303	1.07076e+06	3.4205e+06	3.08533e+07	1.97675	2.01684	0.188433	1.46891	13.1377	1.382	147666	366.057	0.0533508	3.24815	0.313043	3.24578	1112.88	15.014	1098.13	27.6176	1050.03	33.2352
FC-1	42.0352	5.29753	1.99012e+06	152394	321341	1.00339e+06	1.18714e+07	1.96651	2.32454	0.187339	1.43468	13.1294	1.82898	58554	3984.69	0.0544566	3.4246	0.320257	3.36799	1106.94	14.5924	1099.42	36.6034	1071.22	35.7295
FC-1	55.5855	8.22727	1.78349e+06	136031	244324	767936	1.07293e+07	1.94019	2.46864	0.185743	1.52005	13.1942	1.94516	45170.4	114.774	0.0540054	3.91194	0.318157	3.89874	1098.27	15.3497	1089.55	38.937	1062.58	40.4932
FC-1	83.7845	15.1854	2.62745e+06	200148	416700	1.26671e+06	1.58201e+07	1.94005	2.22814	0.185614	1.51127	13.1859	1.63727	83525.1	3229.43	0.0559895	3.68859	0.328961	3.66254	1097.57	15.2521	1090.79	32.7738	1100.57	39.5095
FC-1	39.5328	3.83751	1.55766e+06	119568	191228	611127	9.24636e+06	1.97853	2.49967	0.188239	1.57443	13.1123	1.94153	43091.1	264.859	0.0530696	3.28981	0.31291	3.23093	1111.83	16.0785	1102.03	38.848	1044.63	33.493
FC-1	28.5462	2.55575	4.88315e+06	374949	1.01363e+06	3.02855e+06	2.92165e+07	1.96971	2.16967	0.186805	1.58999	13.0707	1.47629	130705	120.664	0.0570331	3.10875	0.334691	3.10779	1104.04	16.1333	1108.35	29.4769	1120.53	33.8859
FC-1	25.2922	7.65016	2.34729e+06	180414	505663	1.54691e+06	1.41354e+07	1.95527	2.3097	0.185569	1.43645	13.08	1.80868	59137.3	107.191	0.0556311	2.70042	0.326887	2.69597	1097.32	14.494	1106.92	36.1518	1093.71	28.7496
FC-1	64.4778	3.15325	4.16463e+06	319231	788488	2.4623e+06	2.50039e+07	1.95826	2.10873	0.18615	1.46569	13.101	1.51607	91662.3	439.559	0.0545327	2.82845	0.320224	2.8188	1100.48	14.8281	1103.72	30.3338	1072.68	29.5488
FC-1	19.3754	8.78788	4.35739e+06	334295	620322	1.85899e+06	2.60976e+07	1.96563	2.34849	0.186612	1.70955	13.0843	1.61023	115471	249.806	0.0568198	3.18402	0.333688	3.17801	1102.99	17.3313	1106.3	32.2021	1116.45	34.5836
FC-1	20.6572	3.29462	2.14393e+06	163486	396921	1.29077e+06	1.28437e+07	1.94706	2.58408	0.186516	1.67987	13.2023	1.96354	41264.8	107.474	0.0522477	2.95716	0.307507	2.94612	1102.47	17.023	1088.33	39.3101	1028.86	29.6633
FC-1	35.4816	13.0701	1.17115e+06	89654.2	151163	470130	7.0001e+06	1.95397	2.69179	0.186901	1.47963	13.1827	2.24865	26847.4	122.706	0.0543626	3.96431	0.321535	3.91673	1104.57	15.0199	1091.28	45.0049	1069.42	41.2927
FC-1	47.9331	5.1964	4.67531e+06	356758	1.07539e+06	3.17922e+06	2.81899e+07	1.94197	2.1053	0.185364	1.48959	13.1551	1.48775	115173	1347.33	0.0576389	3.63493	0.338255	3.62943	1096.21	15.0162	1095.51	29.7484	1132.1	40.0193
FC-1	19.1312	18.2816	3.65713e+06	280210	733312	2.21972e+06	2.20774e+07	1.94588	1.7865	0.185127	1.23043	13.112	1.29522	76391.5	69.4141	0.0562458	2.83378	0.330363	2.83229	1094.92	12.3903	1102.09	25.8676	1105.47	30.4851
FC-1	37.8163	10.4079	1.5064e+06	114559	153320	458092	9.02822e+06	1.94226	2.33062	0.18645	1.35266	13.2302	1.89792	47768.8	1122.13	0.0567342	3.22493	0.334693	3.04559	1102.11	13.7031	1084.07	38.0367	1114.81	34.9779
FC-1	48.6731	8.62819	4.58447e+06	351464	847325	2.63701e+06	2.7352e+07	1.97138	1.81476	0.187328	1.35012	13.0962	1.21266	103276	213.73	0.0547283	3.1819	0.32132	3.17818	1106.88	13.7317	1104.47	24.2811	1076.43	33.3544
FC-1	84.1966	4.78291	3.65099e+06	280883	763746	2.31076e+06	2.20646e+07	1.95322	1.7966	0.184935	1.29393	13.0491	1.2464	108554	184.729	0.0563093	3.18502	0.330517	3.18275	1093.88	13.0183	1111.66	24.8913	1106.69	34.3002
FC-1	53.3845	6.10837	3.11105e+06	238656	654730	1.92234e+06	1.87954e+07	1.94834	1.81723	0.184996	1.22026	13.0861	1.34659	111845	246.65	0.0580282	3.38742	0.34059	3.38472	1094.21	12.2805	1106.02	26.9509	1139.54	37.5323
FC-1	73.5267	1.7653	1.69633e+06	129981	332811	1.02723e+06	1.02296e+07	1.94366	2.17876	0.185289	1.17968	13.1383	1.83176	41223.2	751.704	0.0550606	3.13	0.32399	3.0747	1095.8	11.888	1098.03	36.695	1082.79	32.9992
FC-1	54.9828	2.95008	7.18896e+06	549287	1.66793e+06	5.08529e+06	4.31692e+07	1.95384	2.15882	0.186133	1.57041	13.1295	1.48132	190589	89.3783	0.0559163	2.85211	0.327992	2.85185	1100.39	15.8863	1099.42	29.5991	1099.17	30.512
FC-1	35.5731	1.85143	3.24006e+06	247581	481504	1.46596e+06	1.94152e+07	1.95513	2.2884	0.186507	1.58234	13.1471	1.65316	77764.8	166.956	0.0558844	2.82691	0.328457	2.81806	1102.42	16.0341	1096.7	33.0886	1098.56	30.226
FC-1	19.3067	0.871802	2.45618e+06	187368	358353	1.02363e+06	1.45602e+07	1.97099	2.39192	0.188511	1.5687	13.1815	1.80568	56068.3	402.468	0.0594975	3.55602	0.350081	3.52431	1113.3	16.0395	1091.46	36.1305	1167.57	40.342
FC-1	31.209	1.5086	1.86711e+06	141884	222647	679918	1.12667e+07	1.92441	2.5095	0.185156	1.52357	13.2603	1.99407	34464.1	51.2041	0.0554431	3.77915	0.327462	3.76882	1095.08	15.3441	1079.54	39.9759	1090.11	40.1053
FC-1	64.1613	7.05928	4.44816e+06	338865	694805	2.09833e+06	2.57184e+07	2.02126	2.10462	0.193302	1.55118	13.1803	1.42242	99101.2	68.5622	0.0563766	3.06829	0.331122	3.06694	1139.24	16.1982	1091.64	28.4967	1107.98	33.0804
FC-1	75.6972	0.997504	2.66696e+06	204479	452821	1.32605e+06	1.60231e+07	1.95563	2.17159	0.186008	1.46021	13.1086	1.60736	65140.2	403.83	0.0580932	3.39854	0.34148	3.37994	1099.71	14.7631	1102.59	32.1643	1140.78	37.6955
FC-1	43.3362	2.56913	1.57127e+06	119922	272518	821937	9.48621e+06	1.93363	3.02439	0.185077	1.93988	13.1914	2.32031	40837.2	45.9509	0.0563155	3.51669	0.331555	3.5137	1094.65	19.5298	1089.98	46.4519	1106.81	37.8759
FC-1	56.7033	13.9219	2.07965e+06	157931	410658	1.25851e+06	1.24831e+07	1.9361	2.81948	0.186156	1.93937	13.2514	2.04654	45547.8	521.294	0.0554756	3.13868	0.326304	3.10255	1100.52	19.6207	1080.87	41.0215	1090.74	33.327
FC-1	38.7164	8.75377	3.74842e+06	286538	778890	2.37086e+06	2.2604e+07	1.94436	1.98483	0.185335	1.42461	13.1369	1.38205	92685	311.934	0.0559564	2.85518	0.328526	2.84926	1096.05	14.3592	1098.25	27.618	1099.94	30.5655
FC-1	25.8987	6.99356	2.13758e+06	163145	329739	988041	1.28382e+07	1.94573	2.27285	0.18606	1.3488	13.179	1.82937	51261.2	695.867	0.056711	3.2078	0.33373	3.15384	1100	13.6399	1091.84	36.6033	1114.37	34.7787
FC-1	30.2858	3.4799	1.74774e+06	133896	342189	1.08493e+06	1.05141e+07	1.94821	2.52379	0.185739	1.49003	13.1396	2.03699	42079	1232.59	0.0536051	2.93923	0.315403	2.87101	1098.25	15.0463	1097.85	40.7753	1054.9	30.2104
FC-1	76.6128	10.0718	3.14268e+06	241167	481312	1.4699e+06	1.87727e+07	1.96931	2.11628	0.187089	1.43139	13.0932	1.55877	72634	335.257	0.0557066	2.92327	0.327446	2.90492	1105.58	14.5426	1104.92	31.1966	1095.16	31.1621
FC-1	55.1736	4.21259	3.11282e+06	237739	656889	1.9261e+06	1.89945e+07	1.91762	2.10023	0.183138	1.43102	13.1622	1.53724	61254.5	254.239	0.0580427	3.52313	0.341046	3.51422	1084.1	14.2794	1094.44	30.743	1139.81	39.0453
FC-1	21.298	2.37933	4.76463e+06	364642	696336	2.07622e+06	2.85873e+07	1.95758	2.03187	0.186283	1.54573	13.1149	1.31879	124548	211.707	0.0571195	3.54404	0.335386	3.54036	1101.21	15.6472	1101.64	26.3555	1122.18	38.6861
FC-1	25.5592	13.1989	2.95477e+06	226901	553572	1.70478e+06	1.77856e+07	1.95486	1.96821	0.185658	1.37654	13.0891	1.40677	63445.2	198.317	0.0552524	3.02511	0.324718	3.01565	1097.81	13.8951	1105.57	28.1584	1086.46	31.9986
FC-1	2.45678	12.4665	1.40493e+06	107961	227418	716152	8.44717e+06	1.95292	2.6151	0.185824	1.35442	13.1138	2.23702	33713.9	135.775	0.053867	3.5513	0.317556	3.52521	1098.71	13.6821	1101.81	44.7175	1059.92	36.6707
FC-1	32.071	11.4896	2.07151e+06	157670	194319	583499	1.24559e+07	1.93859	2.01633	0.185847	1.20488	13.2124	1.61674	54578.6	241.817	0.0564694	3.20201	0.333023	3.14256	1098.84	12.1728	1086.77	32.3876	1109.75	34.5759
FC-1	6.38228	0.503108	1.87615e+06	142953	214084	658358	1.1303e+07	1.93558	2.04611	0.185478	1.22452	13.2067	1.63925	45951.2	348.453	0.055147	3.81067	0.325178	3.74298	1096.83	12.3504	1087.68	32.833	1084.45	40.2351
FC-1	6.91611	1.5472	3.1343e+06	241023	489223	1.48953e+06	1.87997e+07	1.96608	1.70617	0.186328	1.18334	13.0614	1.22912	84430.1	159.85	0.0559003	2.96583	0.328441	2.95964	1101.45	11.9812	1109.78	24.558	1098.86	31.7199
FC-1	42.0735	10.8857	2.75313e+06	211773	514854	1.58371e+06	1.65704e+07	1.95884	1.80389	0.185678	1.20982	13.0639	1.33803	68988.9	73.6499	0.0553275	3.23508	0.325093	3.233	1097.92	12.2134	1109.39	26.7551	1087.9	34.2637
FC-1	35.9165	8.12851	1.47968e+06	114466	195535	600189	8.70866e+06	2.00856	2.83751	0.189834	1.8156	13.0257	2.18061	33875.2	35.1258	0.0551947	3.15247	0.325789	3.14737	1120.48	18.6736	1115.24	43.5258	1085.36	33.3127
FC-1	33.7191	12.5231	2.10565e+06	161795	268952	832542	1.2619e+07	1.96283	2.44322	0.186461	1.61377	13.0924	1.83441	48932.3	486.283	0.0548386	3.07523	0.323049	3.00402	1102.17	16.3491	1105.04	36.6771	1078.54	32.2978
FC-1	61.262	14.5966	3.96566e+06	302956	763419	2.28938e+06	2.39324e+07	1.94132	2.15473	0.18519	1.5684	13.1472	1.4775	85791.7	213.448	0.0567816	3.15778	0.333461	3.15264	1095.26	15.7981	1096.69	29.5576	1115.72	34.2767
FC-1	89.0949	16.7939	2.03525e+06	155257	474689	1.40682e+06	1.2288e+07	1.93358	2.2772	0.185074	1.45873	13.1916	1.74864	45631.7	110.059	0.0573958	3.33673	0.337419	3.33152	1094.64	14.6857	1089.95	35.0197	1127.46	36.5897
FC-1	47.9981	22.2078	1.91636e+06	146154	384153	1.16867e+06	1.15226e+07	1.94163	2.03921	0.185843	1.29662	13.1914	1.5739	48507.7	163.844	0.0558988	2.98946	0.328709	2.97753	1098.82	13.0993	1089.97	31.4928	1098.84	31.9719
FC-1	41.5892	22.7571	1.57021e+06	119917	196545	624837	9.3191e+06	1.96648	2.1446	0.188256	1.37286	13.1939	1.64759	34577.6	377.898	0.0532783	2.99011	0.314554	2.85671	1111.92	14.0212	1089.62	32.9959	1048.64	30.5555
FC-1	56.4287	20.634	3.69017e+06	283453	539891	1.66935e+06	2.21198e+07	1.96591	2.14055	0.186452	1.58751	13.0712	1.43588	100835	493.861	0.0550586	2.87134	0.323414	2.85709	1102.13	16.0825	1108.27	28.6521	1082.75	30.271
FC-1	41.9629	6.71771	3.69865e+06	283315	636029	1.95776e+06	2.20643e+07	1.96926	2.07413	0.187345	1.46822	13.1115	1.46505	87385.1	161.001	0.0553095	2.75936	0.324876	2.75424	1106.98	14.9339	1102.16	29.3354	1087.56	29.2162
FC-1	157.775	67.2397	3.05644e+06	233983	558176	1.70734e+06	1.78795e+07	1.99693	5.48142	0.190971	5.07231	13.1801	2.07789	27561.9	1948.13	0.0554306	4.31928	0.326928	4.1767	1126.64	52.4316	1091.68	41.5817	1089.88	45.8276
FC-1	40.7651	0.328587	1.38972e+06	106906	141089	407563	8.36061e+06	1.95519	2.29221	0.185727	1.36444	13.0918	1.84188	37906.6	102.016	0.0585816	3.71247	0.346178	3.68213	1098.19	13.7773	1105.13	36.8021	1150.1	41.5045
FC-1	2.73528	13.4739	2.83095e+06	217434	577123	1.77177e+06	1.72502e+07	1.93062	2.19003	0.183392	1.53457	13.0917	1.56247	55928.3	196.695	0.0554185	2.99779	0.325731	2.98733	1085.48	15.3305	1105.14	31.234	1089.64	31.8
FC-1	31.8727	8.34685	1.78457e+06	136854	344383	1.04916e+06	1.07001e+07	1.95754	2.67305	0.186363	1.59203	13.1208	2.14725	46487.7	27332.5	0.0558051	3.39984	0.328246	3.32984	1101.64	16.1217	1100.69	42.9486	1097.04	36.3031
FC-1	13.8249	2.56391	4.78417e+06	366744	1.03139e+06	3.0872e+06	2.8982e+07	1.94185	1.80055	0.184497	1.29652	13.0944	1.2494	117165	329.861	0.0569249	2.80117	0.334085	2.79746	1091.49	13.0182	1104.75	25.0138	1118.46	30.4784
FC-1	1.55645	9.33814	1.42726e+06	108844	149545	460432	8.47735e+06	1.96116	2.48776	0.188101	1.31362	13.2188	2.11267	31928.5	525.725	0.0548957	3.5039	0.324792	3.25488	1111.08	13.4069	1085.82	42.3389	1079.63	36.8363
FC-1	75.972	6.42749	1.58212e+06	121207	166026	511933	9.47439e+06	1.95596	2.19674	0.186583	1.37621	13.1469	1.71222	37395.6	112.623	0.0548901	3.42277	0.324312	3.38213	1102.84	13.9501	1096.72	34.2411	1079.53	35.9799
FC-1	70.4786	5.51195	2.59975e+06	199433	547940	1.59663e+06	1.57372e+07	1.94157	2.10753	0.184611	1.42394	13.1044	1.55374	60709.3	156.765	0.0584054	3.28779	0.343185	3.282	1092.12	14.3051	1103.21	31.0677	1146.74	36.6522
FC-1	87.6528	4.56072	4.33211e+06	330744	802875	2.46505e+06	2.60617e+07	1.94686	2.11117	0.185779	1.49938	13.1515	1.48624	99541.1	96.4474	0.0554718	2.59612	0.325704	2.5943	1098.47	15.1434	1096.04	29.7293	1090.66	27.5642
FC-1	82.1595	2.3974	2.03154e+06	155231	252756	751780	1.23235e+07	1.92939	2.42725	0.184222	1.48088	13.1593	1.92316	56521.7	188.457	0.0571041	3.38337	0.336209	3.35963	1090	14.8506	1094.87	38.4654	1121.88	36.9228
FC-1	27.2377	2.73426	4.26059e+06	326105	872577	2.56944e+06	2.56244e+07	1.95165	2.74917	0.185824	2.03162	13.1224	1.85215	85323.9	252.458	0.0578326	3.72656	0.339598	3.72198	1098.72	20.5231	1100.48	37.0875	1135.8	41.1584
FC-1	36.027	14.087	2.68025e+06	204238	349105	1.05695e+06	1.60758e+07	1.94664	2.74664	0.186322	1.88948	13.1914	1.99347	62468.4	370.843	0.0561332	3.13949	0.330293	3.10556	1101.42	19.1303	1089.97	39.9026	1103.32	33.7097
FC-1	96.3926	34.457	5.11848e+06	391554	861884	2.65835e+06	3.0245e+07	1.98577	2.04628	0.18914	1.52651	13.127	1.36273	93684.9	318.652	0.055203	4.53013	0.324218	4.52445	1116.71	15.6519	1099.78	27.2624	1085.52	47.8777
FC-1	81.0113	0.398766	1.02363e+06	78169.5	128512	414829	6.08718e+06	1.95809	3.16935	0.18785	1.53963	13.2218	2.77025	25075.1	550.67	0.0523303	4.66984	0.309795	4.45551	1109.72	15.6959	1085.36	55.503	1030.44	46.9135
FC-1	32.3228	3.68371	2.24514e+06	172083	272751	830819	1.35722e+07	1.94211	1.93887	0.184859	1.35951	13.1184	1.38237	56705.9	88.9409	0.0557542	3.43375	0.328291	3.42454	1093.47	13.6733	1101.07	27.6491	1096.07	36.6335
FC-1	48.0704	2.9082	3.41084e+06	260881	745560	2.32929e+06	2.03159e+07	1.96895	1.98812	0.187631	1.34227	13.1335	1.46661	80033.7	204.941	0.0545091	3.09414	0.320081	3.08962	1108.53	13.6705	1098.76	29.308	1072.23	32.3112
FC-1	41.1427	19.1956	2.23825e+06	172231	369813	1.1788e+06	1.34383e+07	1.9617	2.18693	0.186116	1.38619	13.0757	1.69149	46862.2	497.392	0.0533062	2.53457	0.31372	2.47636	1100.3	14.0216	1107.61	33.8384	1049.17	25.9133
FC-1	63.6653	20.2943	1.55867e+06	119609	272386	843716	9.37202e+06	1.94957	2.675	0.185809	1.43116	13.1353	2.25995	32251	2768.69	0.0547734	3.40342	0.322841	3.24807	1098.63	14.4564	1098.52	45.2232	1077.29	35.7043
FC-1	52.5414	6.31327	1.45319e+06	110538	154875	460683	8.54807e+06	1.97657	2.26741	0.189945	1.34531	13.2443	1.82519	35891.7	123.721	0.0568885	3.87519	0.336186	3.83476	1121.08	13.8433	1081.95	36.5806	1117.76	42.1389
FC-1	8.59468	0.0875751	2.68304e+06	205177	562484	1.69206e+06	1.6356e+07	1.92234	1.93688	0.18332	1.35639	13.1429	1.38265	65201.2	84.5203	0.0565832	3.10917	0.332426	3.10686	1085.08	13.546	1097.35	27.6709	1111.93	33.6375
FC-1	17.2658	11.7075	1.40654e+06	107674	234821	712808	8.43683e+06	1.94842	2.7257	0.186251	1.52297	13.1744	2.26053	29537.4	162.877	0.0558474	3.47303	0.329432	3.43522	1101.04	15.4146	1092.55	45.2361	1097.85	37.1112
FC-1	52.0569	3.65076	3.02076e+06	230404	533179	1.63144e+06	1.81736e+07	1.94294	2.22982	0.185755	1.55137	13.1763	1.60166	66833	475.607	0.055608	3.2214	0.326815	3.20211	1098.34	15.6668	1092.26	32.0422	1093.27	34.2826
FC-1	71.3064	12.1786	1.56475e+06	120328	195865	618621	9.29461e+06	1.97841	2.75519	0.188094	1.53464	13.103	2.28822	34323.6	78.8148	0.0536248	3.15603	0.316616	3.13525	1111.04	15.6621	1103.44	45.7433	1055.28	32.4501
FC-1	68.3767	2.47381	2.11599e+06	162178	258736	786945	1.28263e+07	1.93919	2.33978	0.184377	1.61143	13.1039	1.69642	87416.6	103.592	0.0559279	3.20149	0.328785	3.19659	1090.84	16.1714	1103.31	33.9375	1099.39	34.2564
FC-1	52.8656	2.30168	3.55847e+06	272595	508118	1.52871e+06	2.13023e+07	1.9618	1.8561	0.186688	1.32527	13.1151	1.29953	75154.3	132.997	0.0565407	3.14863	0.332383	3.14175	1103.41	13.44	1101.57	25.9734	1111.11	34.0401
FC-1	49.3865	8.89358	2.76997e+06	212809	500149	1.51937e+06	1.6645e+07	1.95913	1.93243	0.185973	1.31514	13.0828	1.41587	63735	2410.61	0.0560073	3.08391	0.329183	3.04431	1099.52	13.2943	1106.51	28.3347	1100.91	33.0425
FC-1	79.268	6.70194	2.01732e+06	154343	365089	1.14995e+06	1.20432e+07	1.96248	2.13917	0.187183	1.37728	13.1454	1.63681	52748.7	413.879	0.0539866	3.30672	0.317482	3.28034	1106.1	13.9988	1096.99	32.7264	1062.22	34.2171
FC-1	73.2252	8.12986	4.26559e+06	326993	800827	2.50391e+06	2.54554e+07	1.97033	1.93828	0.18728	1.40339	13.0998	1.33695	92702.7	587.403	0.0544659	3.45679	0.31983	3.44736	1106.63	14.2704	1103.94	26.7676	1071.4	36.0712
FC-1	42.8861	6.69436	3.83063e+06	293523	598239	1.7924e+06	2.28015e+07	1.97415	3.948	0.187757	2.79624	13.1078	2.78706	85301.4	427.135	0.0568076	4.14515	0.333763	4.13417	1109.21	28.4946	1102.73	55.6967	1116.21	45.0138
FC-1	40.6888	28.1181	7.72563e+06	590592	1.65019e+06	4.93282e+06	4.7008e+07	1.92883	3.90368	0.183692	2.78958	13.1253	2.73075	159766	292.6	0.0570197	3.26201	0.334534	3.26045	1087.11	27.9066	1100.06	54.5928	1120.27	35.5486
FC-1	55.6199	1.0458	1.53298e+06	116845	162630	490799	9.18355e+06	1.94551	2.60693	0.186515	1.53408	13.2127	2.10776	38424.7	180.561	0.0560992	3.47672	0.331357	3.41695	1102.47	15.5456	1086.74	42.2117	1102.67	37.3093
FC-1	36.2102	15.8002	3.83337e+06	293523	560830	1.66901e+06	2.29392e+07	1.96239	2.01721	0.186764	1.41196	13.1166	1.44066	87017.8	1372.45	0.0571865	3.45582	0.336026	3.43056	1103.82	14.3242	1101.35	28.8329	1123.46	37.7648
FC-1	28.6683	16.0146	2.53732e+06	193253	381730	1.1652e+06	1.5119e+07	1.95689	2.09215	0.187535	1.42816	13.2077	1.52888	49956.9	105.448	0.0556597	3.3037	0.32761	3.29337	1108.01	14.5388	1087.49	30.609	1094.26	35.1894
FC-1	42.7678	10.3382	1.40006e+06	108060	244283	739924	8.34904e+06	1.97675	2.45896	0.187348	1.43607	13.062	1.99605	31092.7	678.983	0.0560009	3.15128	0.330146	3.03203	1106.99	14.6071	1109.68	39.8572	1100.79	33.7608
FC-1	55.4635	0.094298	3.69935e+06	283897	635806	1.96681e+06	2.20409e+07	1.97491	1.84874	0.187576	1.36922	13.0901	1.24222	78680.7	173.974	0.055023	3.0563	0.323267	3.0501	1108.23	13.9414	1105.43	24.8682	1082.07	32.2013
FC-1	39.3497	5.22134	3.15517e+06	241065	483830	1.50204e+06	1.87906e+07	1.96749	1.90084	0.187661	1.31058	13.1454	1.3768	86941.5	163.524	0.0548253	3.01332	0.322116	3.00714	1108.69	13.3495	1096.99	27.5567	1078.29	31.6403
FC-1	59.1829	0.452458	3.26146e+06	248588	517280	1.61064e+06	1.94601e+07	1.9576	2.36691	0.187296	1.64134	13.1861	1.70537	65857.4	159.883	0.0546281	3.29839	0.321165	3.28959	1106.71	16.6912	1090.76	34.1256	1074.51	34.5155
FC-1	53.8729	5.77323	5.29088e+06	404022	1.15268e+06	3.31618e+06	3.14302e+07	1.97296	2.31169	0.188147	1.69036	13.1429	1.57689	131772	72.5087	0.0592357	2.95337	0.347594	2.95294	1111.33	17.2554	1097.35	31.5551	1162.58	33.366
FC-1	66.4311	26.7041	3.72206e+06	285815	737795	2.23505e+06	2.25773e+07	1.93963	2.28294	0.184233	1.70883	13.0906	1.51385	61575.6	82.5882	0.0561722	3.09756	0.330102	3.09469	1090.06	17.1375	1105.35	30.2984	1104.07	33.2814
FC-1	26.8792	1.86087	1.43457e+06	111140	238014	744897	8.64449e+06	1.96459	3.00368	0.185412	1.62699	13.007	2.52488	33568.4	95.2466	0.0542075	3.54116	0.319527	3.52608	1096.47	16.4048	1118.14	50.3917	1066.45	36.7852
FC-1	78.6423	16.53	1.2908e+06	99254.6	149951	464262	7.71264e+06	1.96446	2.9043	0.186973	1.50805	13.1174	2.48209	28854.4	591.673	0.0545916	3.69901	0.322988	3.46056	1104.96	15.3134	1101.21	49.6423	1073.81	38.6831
FC-1	68.3881	12.6848	2.51733e+06	192427	540279	1.56276e+06	1.517e+07	1.94342	2.23945	0.185441	1.5459	13.1508	1.62029	61100.5	274.846	0.0588405	3.31186	0.345721	3.30199	1096.63	15.5893	1096.16	32.4329	1155.04	37.1803
FC-1	75.8308	54.0875	2.99408e+06	231366	566523	1.69778e+06	1.79691e+07	1.97002	2.3984	0.186183	1.68382	13.0251	1.70796	42919	276.271	0.056709	3.36577	0.333684	3.34065	1100.67	17.0373	1115.33	34.0924	1114.33	36.4902
FC-1	45.2512	3.95794	2.07489e+06	159011	279255	835673	1.25752e+07	1.93489	2.56659	0.184371	1.63138	13.1325	1.9814	44176.4	307.88	0.0567113	4.0997	0.334167	4.05812	1090.81	16.3711	1098.95	39.6733	1114.37	44.4489
FC-1	39.4604	6.88358	3.86905e+06	296555	807996	2.45434e+06	2.34553e+07	1.93834	2.2834	0.184348	1.65959	13.1075	1.56834	75555.1	302.457	0.0560531	3.15572	0.329211	3.14783	1090.68	16.6524	1102.76	31.3598	1101.79	33.8381
FC-1	42.024	3.00428	3.38761e+06	260475	662093	1.9631e+06	2.03423e+07	1.96325	2.3604	0.186111	1.71845	13.065	1.61816	78125.8	3571.61	0.0574213	3.62422	0.337269	3.60406	1100.27	17.3821	1109.22	32.3413	1127.94	39.7589
FC-1	55.1659	4.50466	1.71536e+06	132976	273290	846292	1.03401e+07	1.9662	2.70956	0.185356	1.61308	12.9925	2.17709	36982.5	91.0382	0.0548011	3.14585	0.322927	3.13197	1096.17	16.2604	1120.37	43.4314	1077.82	33.0181
FC-1	83.5481	3.40602	2.14165e+06	165784	208138	647896	1.29605e+07	1.95753	2.48199	0.184646	1.74766	13	1.76238	44716.8	526.017	0.0544141	3.37732	0.321252	3.23093	1092.31	17.5601	1119.21	35.1566	1070.41	35.2101
FC-1	50.6454	7.50718	1.3773e+06	104197	171504	531279	8.16828e+06	1.94998	2.46524	0.188397	1.42417	13.3155	2.01226	36704.8	324.19	0.0546982	3.06317	0.322813	2.96265	1112.69	14.5543	1071.22	40.392	1075.85	32.0931
FC-1	33.9823	2.38068	5.00013e+06	381971	758557	2.04355e+06	2.95754e+07	1.98158	2.09932	0.188955	1.57517	13.1419	1.38781	107571	314.799	0.0632057	3.14557	0.371195	3.13801	1115.71	16.1376	1097.5	27.7725	1238.15	37.7775
FC-1	16.2968	0.424961	1.62995e+06	124213	280569	853619	9.88412e+06	1.92112	2.571	0.184251	1.57061	13.2181	2.03549	36737.2	258.259	0.0557977	3.68767	0.328681	3.65248	1090.16	15.7526	1085.92	40.8065	1096.9	39.3716
FC-1	71.5963	9.03106	3.09037e+06	236375	733333	2.15365e+06	1.85287e+07	1.95614	2.31639	0.1864	1.63782	13.1328	1.63806	81234.7	538.826	0.0579972	3.27472	0.340507	3.26706	1101.84	16.5882	1098.89	32.7781	1138.94	36.2653
FC-1	58.2827	17.3285	1.86651e+06	142545	373048	1.1539e+06	1.12394e+07	1.94091	2.41821	0.185566	1.59652	13.1767	1.81628	45630	221.795	0.0549662	3.42273	0.323293	3.4069	1097.31	16.1089	1092.2	36.3402	1080.98	36.0267
FC-1	60.2969	3.96161	2.88754e+06	221922	511988	1.55521e+06	1.74252e+07	1.9518	2.23225	0.185188	1.60032	13.0765	1.55625	66507.3	96.2841	0.0560151	3.19977	0.329207	3.19612	1095.26	16.1195	1107.47	31.0956	1101.06	34.2885
FC-1	69.3532	11.1393	4.041e+06	307300	781657	2.34462e+06	2.4216e+07	1.94613	2.08194	0.186499	1.49821	13.2074	1.44563	86823.9	74.0337	0.0567702	2.65923	0.333383	2.65775	1102.38	15.181	1087.53	28.9754	1115.5	28.8596
FC-1	34.3791	12.4211	2.05492e+06	156650	262692	816830	1.24374e+07	1.92674	2.42568	0.184615	1.51035	13.2055	1.89809	41878.5	551.528	0.0545466	3.59279	0.321599	3.49943	1092.14	15.1735	1087.85	38.0114	1072.95	37.543
FC-1	81.5949	17.2187	3.06425e+06	234930	552132	1.64979e+06	1.84067e+07	1.95586	1.86381	0.186041	1.33458	13.1094	1.30104	64778.9	95.4532	0.0569427	3.31317	0.334668	3.30958	1099.89	13.4949	1102.47	26.0022	1118.8	36.06
FC-1	70.9744	2.56999	2.47523e+06	189608	455256	1.4266e+06	1.48628e+07	1.95501	2.10073	0.186113	1.4896	13.1202	1.48127	65720.5	288.119	0.0543022	2.92048	0.31912	2.90696	1100.29	15.0675	1100.79	29.6114	1068.27	30.3879
FC-1	72.2639	2.46328	1.99498e+06	153399	380548	1.15817e+06	1.20058e+07	1.95708	2.27202	0.185692	1.35264	13.0766	1.82549	56413.1	486.535	0.0558939	3.71761	0.328578	3.69694	1098	13.656	1107.44	36.4717	1098.74	39.756
FC-1	54.8684	4.47748	1.91705e+06	146891	372967	1.1338e+06	1.1544e+07	1.94827	2.41461	0.185569	1.41692	13.1271	1.95517	51148.9	284.479	0.0559446	3.71883	0.328954	3.70312	1097.33	14.2969	1099.78	39.1151	1099.71	39.8033
FC-1	49.4742	17.1196	8.20594e+06	627673	1.00338e+06	2.83824e+06	5.02849e+07	1.917	2.20839	0.182404	1.68795	13.1137	1.42402	215235	1244.56	0.0602395	2.61388	0.35352	2.60655	1080.1	16.786	1101.82	28.5175	1181.71	30.0025
FC-1	16.8804	3.38859	1.69419e+06	130346	255967	765368	1.02295e+07	1.95164	2.56046	0.185077	1.56826	13.0697	2.02398	55517.8	191.399	0.0568439	2.7626	0.334437	2.74149	1094.65	15.7886	1108.51	40.4087	1116.91	30.0183
FC-1	32.8303	10.0848	3.48356e+06	267562	727041	2.20439e+06	2.10314e+07	1.95036	1.96458	0.18511	1.35627	13.0806	1.4213	74804.9	341.921	0.0561547	2.81071	0.329815	2.80085	1094.83	13.6564	1106.86	28.4423	1103.73	30.1905
FC-1	33.3796	8.07063	2.25521e+06	172586	333044	971652	1.35073e+07	1.95704	2.14168	0.18658	1.43777	13.1394	1.58733	56056.3	700.654	0.0582559	3.54925	0.342761	3.50425	1102.82	14.5738	1097.86	31.7669	1143.88	39.4713
FC-1	62.1546	17.2903	3.62868e+06	277114	708026	2.19272e+06	2.21148e+07	1.92054	2.1323	0.183372	1.50022	13.159	1.51526	68709.1	75.3957	0.0549589	3.33354	0.322898	3.33162	1085.37	14.986	1094.93	30.3373	1080.84	35.0835
FC-1	36.1529	10.1491	3.91964e+06	298424	785688	2.36432e+06	2.36951e+07	1.93305	2.11982	0.184887	1.54424	13.1818	1.45223	133783	334.834	0.0566267	2.97353	0.33231	2.97038	1093.61	15.5333	1091.42	29.0695	1112.76	32.1935
FC-1	26.1505	1.1836	2.09187e+06	160507	476265	1.38967e+06	1.26876e+07	1.93798	2.07476	0.184247	1.30834	13.1028	1.61024	58732.1	383.597	0.058332	4.54188	0.342717	4.53302	1090.14	13.1219	1103.46	32.2356	1145.33	50.5726
FC-1	33.475	5.5782	3.24907e+06	247877	496403	1.48943e+06	1.94293e+07	1.95724	1.8653	0.186898	1.31857	13.1605	1.31937	101734	92.7234	0.0567448	3.56182	0.333284	3.56003	1104.55	13.3849	1094.69	26.3816	1115.02	38.6388
FC-1	47.9597	3.23694	2.85321e+06	216227	542652	1.66884e+06	1.72502e+07	1.91998	2.39472	0.184836	1.67255	13.2679	1.71385	57305	526.606	0.0553156	3.69367	0.325167	3.67229	1093.34	16.82	1078.37	34.3969	1087.67	39.1127
FC-1	53.4531	11.1106	2.2802e+06	174003	359194	1.10799e+06	1.3751e+07	1.93779	2.53036	0.185301	1.77248	13.179	1.80584	53558.2	167.213	0.0551028	3.95052	0.324186	3.93891	1095.87	17.8628	1091.84	36.1326	1083.6	41.68
FC-1	26.6083	7.25393	1.85426e+06	142314	361573	1.11167e+06	1.1189e+07	1.94581	2.41716	0.185172	1.59721	13.1156	1.81427	42070.2	112.644	0.055278	3.20055	0.325251	3.19112	1095.17	16.087	1101.49	36.3254	1086.95	33.8692
FC-1	33.3835	8.49341	3.33398e+06	254717	703850	2.02306e+06	2.01526e+07	1.93833	2.38507	0.184893	1.72751	13.1463	1.64447	85499.1	294.77	0.0592523	3.55777	0.347915	3.55258	1093.65	17.3772	1096.81	32.8777	1162.89	40.2049
FC-1	57.1497	2.33687	2.12904e+06	161803	362721	1.16569e+06	1.24269e+07	1.99499	2.10499	0.19146	1.50441	13.2267	1.47232	62573.7	195.037	0.0529305	2.55223	0.311165	2.53909	1129.28	15.5841	1084.64	29.5115	1041.96	25.9192
FC-1	53.8537	0.959077	2.1091e+06	160986	281679	849945	1.2737e+07	1.93345	2.24553	0.185026	1.32245	13.189	1.81481	41612.6	844.532	0.0562225	3.46433	0.331408	3.35273	1094.37	13.3108	1090.33	36.3197	1105.03	37.2536
FC-1	53.2128	6.32817	1.28708e+06	98450.6	213034	663011	7.64888e+06	1.96736	2.46339	0.188008	1.45824	13.1706	1.98541	35707	223.336	0.0545285	2.93445	0.321314	2.89033	1110.58	14.8766	1093.12	39.7206	1072.6	30.6539
FC-1	29.5914	5.04641	3.68558e+06	281681	564943	1.71502e+06	2.17401e+07	1.98712	1.8597	0.189468	1.35564	13.1409	1.27308	87634.2	5726.49	0.0560678	2.74987	0.32941	2.71385	1118.49	13.9203	1097.66	25.44	1102.07	29.4936
FC-1	56.6345	7.90114	4.08932e+06	312825	864794	2.71793e+06	2.46415e+07	1.94682	2.09368	0.185468	1.57052	13.1297	1.38455	84936.4	167.185	0.0541881	2.71342	0.318181	2.70956	1096.78	15.8395	1099.38	27.6803	1066.08	28.1772
FC-1	44.5493	6.9856	1.79262e+06	135633	292801	880423	1.0803e+07	1.92074	2.21035	0.185417	1.47657	13.3043	1.64481	42728.1	254.367	0.0564839	3.37396	0.332568	3.34163	1096.5	14.8885	1072.9	33.0232	1110.03	36.4416
FC-1	40.9672	11.3271	1.50267e+06	114819	260529	780489	9.10895e+06	1.92628	2.62725	0.184314	1.60661	13.1872	2.07876	34499.2	347.646	0.0566511	4.02784	0.333803	3.97789	1090.5	16.1183	1090.6	41.6074	1113.22	43.6259
FC-1	26.5014	1.62235	4.37545e+06	335406	1.05401e+06	3.16701e+06	2.65075e+07	1.94096	2.08124	0.18448	1.5299	13.0992	1.41102	96145.7	117.187	0.0567012	3.34384	0.332809	3.34265	1091.4	15.3604	1104.01	28.2254	1114.18	36.2478
FC-1	15.1982	9.62613	2.11474e+06	162181	331055	1.00044e+06	1.28741e+07	1.92823	2.46262	0.183553	1.65432	13.1195	1.8242	47256.8	413.081	0.0562163	2.94053	0.33091	2.89003	1086.36	16.5391	1100.9	36.5233	1104.91	31.6177
FC-1	25.4524	7.24573	2.00271e+06	152955	246584	755503	1.20846e+07	1.9372	2.58144	0.185184	1.65256	13.1747	1.98314	46661.2	467.812	0.0553803	2.97701	0.326384	2.89016	1095.23	16.6454	1092.49	39.6785	1088.91	31.5589
FC-1	49.3788	0.0362959	3.87977e+06	297736	768211	2.32678e+06	2.32534e+07	1.96453	1.91588	0.186476	1.40088	13.0821	1.30696	107756	141.533	0.0562437	3.07321	0.330161	3.07125	1102.26	14.1933	1106.61	26.1208	1105.43	33.0595
FC-1	39.8571	1.79479	1.9788e+06	151239	381068	1.1878e+06	1.1963e+07	1.93444	2.16823	0.184828	1.4049	13.1681	1.65151	44160.9	81.4809	0.054532	2.74246	0.320819	2.73621	1093.29	14.1278	1093.54	33.0334	1072.67	28.6502
FC-1	13.512	5.33347	1.54458e+06	118448	282533	845044	9.17382e+06	1.97397	2.23529	0.188121	1.23587	13.1344	1.86256	37110	771.705	0.0567781	3.20318	0.334341	3.12651	1111.19	12.6145	1098.67	37.3066	1115.65	34.7674
FC-1	23.2169	3.08952	3.58426e+06	274154	732429	2.1834e+06	2.15357e+07	1.95254	1.98519	0.186009	1.45584	13.1294	1.34964	91431.1	425.654	0.0571336	3.25561	0.335454	3.24853	1099.72	14.719	1099.42	26.9645	1122.45	35.5458
FC-1	44.473	6.1732	2.28797e+06	175454	363281	1.14796e+06	1.38001e+07	1.94742	1.99247	0.185273	1.3187	13.1119	1.49363	56520.5	479.126	0.0538012	3.31286	0.316459	3.27957	1095.72	13.288	1102.09	29.8823	1058.66	34.1689
FC-1	55.6427	2.24979	2.24857e+06	171654	466335	1.43519e+06	1.34935e+07	1.94916	2.09492	0.186224	1.33101	13.1674	1.61775	62503.5	218.553	0.0553003	3.05581	0.324929	3.04721	1100.89	13.47	1093.64	32.3656	1087.38	32.3499
FC-1	47.7996	39.046	1.34889e+06	104097	182807	581462	7.98957e+06	1.98743	2.75542	0.188603	1.40946	13.0788	2.36764	26057.1	194.849	0.0531641	4.02177	0.314391	3.94471	1113.8	14.4173	1107.12	47.3173	1046.45	41.0142
FC-1	33.1506	21.1013	5.78519e+06	444956	856672	2.53159e+06	3.49585e+07	1.95372	1.96003	0.184964	1.45091	13.0478	1.3178	138108	315.467	0.0576422	3.28253	0.338392	3.27789	1094.04	14.5996	1111.85	26.3386	1132.16	36.1415
FC-1	16.6325	0.747891	1.5026e+06	116205	218484	646264	9.08659e+06	1.95625	3.16899	0.184774	2.21751	13.0175	2.26388	40840.2	166.862	0.0573738	3.71115	0.338073	3.68602	1093	22.294	1116.53	45.1413	1127.04	40.6807
FC-1	45.9302	2.36496	1.97886e+06	152320	385967	1.15639e+06	1.19268e+07	1.95557	3.19464	0.185406	2.1807	13.0666	2.33458	51780.5	114.87	0.056766	2.73483	0.333769	2.72731	1096.44	21.9872	1108.97	46.6756	1115.42	29.678
FC-1	36.1225	12.2273	3.029e+06	231014	592216	1.85749e+06	1.82405e+07	1.94229	2.08102	0.185588	1.50618	13.1689	1.436	86829.4	3659.14	0.0542925	3.44545	0.318827	3.42817	1097.43	15.1989	1093.41	28.7211	1068.08	35.8443
FC-1	17.8113	21.9321	4.5843e+06	350428	937256	2.8808e+06	2.75192e+07	1.95421	1.84324	0.186187	1.34938	13.1308	1.25567	122027	65.0632	0.0554351	3.07537	0.325346	3.07489	1100.69	13.6537	1099.19	25.0907	1089.96	32.6321
FC-1	27.0813	2.36528	1.76635e+06	136351	276091	800915	1.06971e+07	1.95069	2.26834	0.184511	1.45913	13.0361	1.73675	45125.4	147.329	0.0585503	3.37473	0.344719	3.35738	1091.57	14.652	1113.65	34.7011	1149.5	37.7095
FC-1	35.5044	5.32528	1.63528e+06	126099	191702	672955	9.52176e+06	2.0263	2.25589	0.191903	1.33417	13.0524	1.81907	43155.6	225.749	0.0483005	3.05204	0.284866	2.99229	1131.67	13.8475	1111.16	36.3532	952.935	28.4086
FC-1	62.5171	28.7623	3.75132e+06	286383	788754	2.36163e+06	2.26472e+07	1.93819	2.28899	0.185113	1.6227	13.1629	1.6144	69772.3	80.1108	0.0568577	3.29318	0.333987	3.2914	1094.85	16.3394	1094.33	32.3086	1117.17	35.7918
FC-1	29.1909	12.0994	3.53849e+06	271152	720026	2.07784e+06	2.14263e+07	1.94155	2.31335	0.184576	1.67967	13.102	1.59069	103590	192.505	0.0590304	3.02891	0.346526	3.02596	1091.92	16.8715	1103.6	31.804	1158.66	34.1074
FC-1	47.0022	5.91629	1.41244e+06	108466	234404	724918	8.5506e+06	1.93699	2.87795	0.184546	1.50619	13.1307	2.45235	30252.1	4328.04	0.0548228	3.34713	0.323352	3.13464	1091.76	15.1269	1099.2	49.0297	1078.24	35.1438
FC-1	55.2422	14.7055	2.33585e+06	180007	373021	1.1585e+06	1.41549e+07	1.94847	2.30995	0.184415	1.52467	13.0441	1.73529	61567.4	2877	0.0547574	3.62765	0.321986	3.5802	1091.05	15.3033	1112.42	34.6451	1076.99	38.0462
FC-1	60.9033	11.5534	3.00707e+06	230182	571293	1.73718e+06	1.80892e+07	1.95061	3.3409	0.185779	2.5274	13.1262	2.18492	72529	138.915	0.0559776	3.26884	0.328862	3.26452	1098.47	25.5262	1099.88	43.7207	1100.34	35.0064
FC-1	57.0579	3.46145	4.83283e+06	369207	1.10588e+06	3.3136e+06	2.91528e+07	1.94307	3.01718	0.185278	2.15503	13.1416	2.11168	106182	51.8322	0.0568631	3.07621	0.333738	3.07587	1095.74	21.7158	1097.54	42.2602	1117.28	33.4367
FC-1	49.3521	2.40814	1.74113e+06	135512	334297	1.04215e+06	1.05484e+07	1.9651	3.82259	0.184433	2.76579	12.935	2.63867	40482.2	342.88	0.054506	3.30761	0.320777	3.27259	1091.15	27.7629	1129.2	52.5416	1072.17	34.5386
FC-1	57.409	4.78855	2.93527e+06	225647	507062	1.51986e+06	1.75288e+07	1.97342	3.4362	0.187142	2.42741	13.0696	2.43212	73688.6	777.792	0.0567778	3.39138	0.333625	3.37061	1105.88	24.6678	1108.51	48.5742	1115.65	36.8101
FC-1	58.6832	6.42153	4.18892e+06	318777	648882	1.86543e+06	2.52003e+07	1.94106	2.89487	0.185784	2.07646	13.1911	2.01708	114216	178.893	0.0592387	3.02951	0.347847	3.0256	1098.49	20.9722	1090.02	40.3752	1162.64	34.2278
FC-1	87.0654	19.9716	3.00602e+06	228670	476868	1.47753e+06	1.80066e+07	1.94518	2.90499	0.186556	2.04572	13.2178	2.06252	57145.1	99.2814	0.0548721	3.09663	0.322746	3.08993	1102.69	20.7341	1085.98	41.3483	1079.18	32.5413
FC-1	8.86178	0.798447	2.12017e+06	162977	264097	787306	1.27362e+07	1.95844	2.22308	0.186016	1.43394	13.0903	1.6988	45878.9	403.836	0.056916	3.06442	0.335444	2.98631	1099.76	14.498	1105.39	33.9474	1118.29	33.3378
FC-1	35.7791	11.6529	3.80201e+06	290854	744399	2.23002e+06	2.30292e+07	1.93711	1.9158	0.184513	1.30879	13.1276	1.39905	90627.5	391.568	0.0568481	3.04185	0.333808	3.034	1091.58	13.1425	1099.71	27.9766	1116.99	33.0549
FC-1	29.2213	14.6972	1.82319e+06	139488	274983	801303	1.10305e+07	1.93462	2.53077	0.184689	1.7197	13.157	1.85672	42331.2	90.4188	0.0582601	3.54107	0.343169	3.53085	1092.54	17.2825	1095.22	37.1327	1143.96	39.3829
FC-1	23.3619	4.52917	3.21826e+06	247036	474821	1.23954e+06	1.98168e+07	1.91061	2.3308	0.181491	1.64787	13.0917	1.64838	68102.7	631.856	0.0651486	3.71443	0.383063	3.68668	1075.12	16.318	1105.14	32.9813	1275.04	45.8968
FC-1	17.5519	7.09312	1.7118e+06	130918	188246	574566	1.02664e+07	1.95336	2.38496	0.186331	1.44781	13.1466	1.89523	57453.4	142.815	0.0556194	3.28246	0.327631	3.2625	1101.47	14.6591	1096.77	37.9384	1093.49	34.9393
FC-1	45.5679	12.4033	4.18316e+06	320474	866975	2.60057e+06	2.54847e+07	1.92894	2.08021	0.183451	1.6016	13.1073	1.32747	95127.1	332.89	0.056785	3.09019	0.333379	3.08462	1085.8	16.0045	1102.79	26.5652	1115.78	33.545
FC-1	45.6824	6.17763	1.43173e+06	107829	191803	589682	8.49663e+06	1.93814	2.65665	0.18826	1.5837	13.387	2.133	31569.8	161.609	0.0550832	3.52199	0.325265	3.47142	1111.94	16.1748	1060.44	42.9387	1083.22	37.1463
FC-1	24.0752	4.80888	7.00049e+06	534625	319684	951443	4.26952e+07	1.9223	1.88217	0.183266	1.39619	13.1394	1.26223	149898	400.264	0.0570615	3.66791	0.336	3.62915	1084.79	13.9401	1097.87	25.2602	1121.07	39.9997
FC-1	26.1047	2.76131	2.64335e+06	201963	472524	1.49973e+06	1.57373e+07	1.96584	2.36511	0.187703	1.62693	13.1594	1.71664	57812.9	160.281	0.0535902	3.28859	0.315073	3.27957	1108.92	16.5749	1094.87	34.3393	1054.62	33.7924
FC-1	31.2319	6.39412	3.74684e+06	287990	760211	2.29459e+06	2.27142e+07	1.94424	2.27508	0.184354	1.6381	13.0682	1.5788	82733.4	137.094	0.0564162	3.57007	0.331305	3.56751	1090.72	16.4373	1108.74	31.58	1108.73	38.516
FC-1	51.0727	13.1833	3.31659e+06	254170	478297	1.46983e+06	1.99273e+07	1.95527	2.06815	0.186003	1.46299	13.1107	1.46182	73160.2	304.613	0.0553518	2.6411	0.32541	2.62027	1099.69	14.7909	1102.29	29.2337	1088.37	27.9843
FC-1	70.2993	14.4651	3.77277e+06	288804	784131	2.46775e+06	2.27755e+07	1.94382	2.3097	0.185124	1.80747	13.1256	1.43798	72830.3	434.902	0.0540973	3.43191	0.317751	3.42163	1094.91	18.2007	1099.99	28.7344	1064.34	35.5816
FC-1	49.2301	6.87477	3.45342e+06	265063	744856	2.31867e+06	2.04284e+07	1.99079	2.06649	0.188938	1.46698	13.0799	1.45546	107418	191.578	0.0547308	2.76277	0.321243	2.76012	1115.62	15.028	1106.94	29.1251	1076.48	28.9621
FC-1	57.8363	4.49436	3.95279e+06	302299	772242	2.2627e+06	2.38778e+07	1.94213	2.02472	0.185015	1.44749	13.1293	1.41571	98418.5	397.358	0.0581307	2.99977	0.341293	2.99287	1094.32	14.5686	1099.43	28.3269	1141.49	33.2927
FC-1	68.9832	0.26313	2.07523e+06	159988	258224	795183	1.2579e+07	1.94585	2.40511	0.184342	1.6259	13.0565	1.77229	42291.2	86.7529	0.055073	3.60436	0.324735	3.58975	1090.65	16.314	1110.52	35.4375	1083.03	38.0084
FC-1	68.9833	7.03814	5.96041e+06	455637	900031	2.7524e+06	3.59111e+07	1.94709	1.95844	0.185508	1.51108	13.1307	1.24584	119458	130.577	0.0556901	3.19306	0.326999	3.19068	1096.99	15.2427	1099.2	24.9173	1094.84	34.0286
FC-1	24.7238	8.03281	1.09014e+06	84458.1	152920	465200	6.54241e+06	1.96761	3.76427	0.186127	1.52397	13.0372	3.44198	23548.2	1283.38	0.0555525	4.11096	0.328719	3.78608	1100.36	15.4161	1113.47	68.731	1092.21	43.7081
FC-1	2.5674	7.48349	1.79075e+06	138179	273536	803656	1.08167e+07	1.95463	2.8029	0.18499	1.51368	13.0435	2.35902	43307.7	63.0848	0.0577938	3.50408	0.340365	3.49829	1094.18	15.233	1112.51	47.1427	1135.06	38.6767
FC-1	42.043	11.972	1.30145e+06	99773.8	177700	550865	7.85434e+06	1.94178	2.75383	0.185136	1.68031	13.1402	2.18177	36026.7	2609.89	0.0546856	4.02872	0.322584	3.85799	1094.97	16.9212	1097.78	43.6629	1075.61	42.2
FC-1	20.0698	5.56322	3.37793e+06	258812	534286	1.6473e+06	2.02399e+07	1.96087	2.35989	0.186522	1.61668	13.1097	1.71913	82941.5	160.229	0.0552017	3.00606	0.324341	2.99978	1102.51	16.3831	1102.43	34.4175	1085.49	31.7695
FC-1	23.7434	20.544	4.54683e+06	347058	864059	2.49448e+06	2.74715e+07	1.93837	2.25005	0.184983	1.67275	13.1525	1.50487	108492	73622.5	0.0590051	4.37467	0.346388	4.36435	1094.14	16.8334	1095.87	30.1091	1158.18	49.2415
FC-1	56.5203	16.8819	4.67992e+06	358541	959365	2.94904e+06	2.76997e+07	1.98617	2.17711	0.18883	1.58825	13.1029	1.48905	113311	229.376	0.0554247	2.85584	0.325314	2.85277	1115.03	16.2625	1103.45	29.7905	1089.76	30.2974
FC-1	23.7586	2.15688	2.14175e+06	163447	246779	732946	1.29167e+07	1.93886	2.44405	0.185301	1.7103	13.1717	1.74593	62372.9	395.35	0.0571921	3.82019	0.336695	3.78304	1095.87	17.2361	1092.95	34.9263	1123.56	41.7506
FC-1	40.2385	4.0688	1.95177e+06	148812	247004	729605	1.16677e+07	1.95124	2.54121	0.186917	1.64003	13.2023	1.94115	42611.1	80.1416	0.0574235	3.3225	0.338545	3.30886	1104.65	16.6493	1088.33	38.8639	1127.99	36.4503
FC-1	24.4835	18.8855	3.69975e+06	283079	963732	2.90161e+06	2.22876e+07	1.94824	2.19371	0.185524	1.56443	13.1241	1.53784	94747.3	97.2027	0.0565915	2.82897	0.332137	2.82801	1097.08	15.7821	1100.22	30.7263	1112.08	30.6103
FC-1	57.8097	41.4078	3.83371e+06	295829	848626	2.60573e+06	2.40272e+07	1.88697	2.67799	0.178311	2.08073	13.0234	1.68589	67057.8	82.7477	0.0554441	3.94954	0.325676	3.94791	1057.74	20.298	1115.58	33.6883	1090.13	41.9143
FC-1	85.7073	33.8931	1.41087e+06	107404	218869	659784	8.49934e+06	1.92174	2.39209	0.185392	1.38043	13.2956	1.9536	18985.5	119.878	0.0559963	3.56867	0.331728	3.49602	1096.36	13.9175	1074.21	39.2308	1100.7	38.2294
FC-1	49.4513	22.7235	3.44543e+06	263416	717294	2.17179e+06	2.08985e+07	1.93017	2.11307	0.184231	1.56905	13.1547	1.41532	52987.2	159.115	0.0561868	3.27091	0.330277	3.26297	1090.05	15.7356	1095.58	28.318	1104.34	35.1526
FC-1	60.396	8.22084	1.62664e+06	125353	307060	982202	9.62124e+06	1.99394	2.9147	0.188917	1.83549	13.0578	2.26416	45557	102.694	0.0531415	2.69085	0.312624	2.68132	1115.51	18.8014	1110.32	45.2138	1046.01	27.4304
FC-1	35.6761	0.934588	1.77833e+06	136411	316997	980448	1.07416e+07	1.94357	2.63226	0.184993	1.75306	13.118	1.96356	45916.9	596.807	0.0549491	3.09453	0.323319	3.046	1094.19	17.6423	1101.12	39.2982	1080.66	32.5626
FC-1	53.5255	14.3426	1.88752e+06	145293	297323	879975	1.14047e+07	1.95056	2.30092	0.184943	1.53581	13.0675	1.71334	50478.4	579.365	0.0574167	3.60339	0.337876	3.55916	1093.92	15.4524	1108.84	34.2598	1127.86	39.5274
FC-1	38.8767	21.85	4.17342e+06	319887	798043	2.36982e+06	2.5335e+07	1.93732	2.06692	0.184111	1.46411	13.0975	1.45895	109177	2448.8	0.0573648	3.59143	0.336753	3.58115	1089.39	14.675	1104.28	29.2009	1126.86	39.3625
FC-1	40.6962	2.69434	2.0754e+06	159354	193938	583877	1.25962e+07	1.93796	3.17834	0.184125	2.23751	13.0943	2.25729	57893.4	23724.2	0.0563404	3.83039	0.332155	3.65796	1089.47	22.4285	1104.77	45.1079	1107.28	41.2719
FC-1	41.4288	7.01042	1.4421e+06	110788	222760	705483	8.6604e+06	1.95514	3.31346	0.186048	2.17862	13.1147	2.49651	34989.5	256.233	0.0535586	3.27709	0.315755	3.22382	1099.93	22.0304	1101.67	49.8948	1054.01	33.6553
FC-1	38.7202	16.8239	1.83915e+06	141014	361795	1.11508e+06	1.10707e+07	1.94738	2.39539	0.185617	1.41433	13.1364	1.93328	37174.6	1383.7	0.0551174	3.32511	0.324456	3.24453	1097.59	14.2739	1098.36	38.6861	1083.88	35.0904
FC-1	31.2127	0.571401	1.53705e+06	117749	215602	640275	9.22697e+06	1.95082	2.44639	0.186125	1.49982	13.1492	1.93271	36460.8	170.09	0.057098	3.66376	0.336733	3.62678	1100.35	15.1716	1096.39	38.6858	1121.77	39.9786
FC-1	58.5038	16.9129	1.88947e+06	144071	186508	560649	1.14399e+07	1.92692	2.31034	0.184556	1.42252	13.2001	1.82046	43614.2	3396.43	0.0563433	4.66341	0.332665	4.46457	1091.82	14.2873	1088.65	36.4446	1107.34	50.2499
FC-1	58.5038	10.1378	1.22437e+06	93579.3	166339	523770	7.28374e+06	1.96192	2.95146	0.1878	1.51361	13.1925	2.53379	30647.6	483.469	0.0537757	4.4868	0.317581	4.36974	1109.45	15.4271	1089.81	50.731	1058.17	46.2561
FC-1	58.5801	4.01261	4.09147e+06	313937	774868	2.37824e+06	2.47392e+07	1.94739	2.10634	0.184844	1.66417	13.0817	1.2912	119437	613.665	0.055508	3.31364	0.325816	3.3077	1093.38	16.7364	1106.7	25.8061	1091.36	35.2042
FC-1	36.0575	5.29436	2.0241e+06	154835	193970	586398	1.22717e+07	1.9307	2.18838	0.184307	1.44516	13.1565	1.64332	44340.8	108.761	0.056019	3.5939	0.330782	3.56602	1090.46	14.4982	1095.31	32.8713	1101.13	38.5145
FC-1	3.73082	4.41218	3.34514e+06	255559	496304	1.50159e+06	2.01139e+07	1.9487	2.3456	0.185871	1.74339	13.1455	1.56921	89815.6	276.01	0.0562555	3.81934	0.33052	3.81102	1098.97	17.6152	1096.97	31.4071	1105.66	41.094
FC-1	40.7192	5.8419	2.81559e+06	216580	539457	1.64968e+06	1.69651e+07	1.95743	2.37342	0.185479	1.73853	13.0593	1.61575	79163.9	338.193	0.0556735	3.33272	0.327008	3.32372	1096.84	17.5348	1110.1	32.241	1094.52	35.5069
FC-1	75.2471	24.1587	1.09206e+07	836529	2.88324e+06	9.06933e+06	6.62866e+07	1.93832	3.03492	0.184145	2.1717	13.0933	2.12001	247622	122.251	0.05421	3.60085	0.317911	3.6007	1089.58	21.7708	1104.9	42.4082	1066.5	37.4069
FC-1	50.344	23.7925	3.41346e+06	261541	856796	2.60196e+06	2.05637e+07	1.94948	3.18919	0.185507	2.2165	13.1146	2.29306	70502.2	673.512	0.0560782	2.42142	0.329288	2.40753	1096.99	22.3584	1101.69	45.8738	1102.27	25.9755
FC-1	30.6558	6.80282	1.75002e+06	132553	232069	674508	1.0668e+07	1.89928	2.39085	0.183289	1.5131	13.3002	1.85113	36300.4	607.082	0.0583174	3.83178	0.344057	3.71761	1084.92	15.1089	1073.52	37.14	1145.06	42.6558
FC-1	62.334	0.0278156	3.4783e+06	266471	715822	2.25393e+06	2.10952e+07	1.93755	2.10466	0.18428	1.47042	13.108	1.50581	93043.7	30277.6	0.0540929	2.786	0.317589	2.76734	1090.31	14.7497	1102.69	30.1115	1064.25	28.8827
FC-1	29.9615	19.1234	2.26699e+06	173012	425189	1.30517e+06	1.3642e+07	1.94071	2.03317	0.185688	1.42925	13.1867	1.44603	44789.6	111.668	0.0553714	3.0069	0.325772	2.99728	1097.97	14.4291	1090.68	28.9678	1088.74	31.8709
FC-1	53.7659	29.7437	3.77406e+06	289233	557380	1.69454e+06	2.24077e+07	1.97911	1.76105	0.188232	1.23996	13.108	1.25051	79009.4	89.601	0.0559659	2.93668	0.328927	2.93306	1111.79	12.6625	1102.7	24.9911	1100.12	31.4431
FC-1	54.7082	6.52645	3.32606e+06	253593	821556	2.48696e+06	1.97283e+07	1.9715	2.00211	0.188421	1.43971	13.1718	1.39128	90379.8	104.343	0.0562787	2.74311	0.330345	2.74176	1112.82	14.7148	1092.94	27.8324	1106.1	29.5259
FC-1	19.0015	9.08997	1.50529e+06	115909	259493	811856	9.12225e+06	1.94314	2.64818	0.184376	1.49633	13.0772	2.18491	39043.6	15332.7	0.0542772	3.17306	0.319629	3.04009	1090.84	15.0162	1107.38	43.6373	1067.79	33.0016
FC-1	60.2053	11.5405	3.41048e+06	261053	608028	1.83169e+06	2.072e+07	1.93218	2.91507	0.183956	2.06422	13.1214	2.0583	86023.8	148.716	0.0565161	2.96159	0.33195	2.95748	1088.55	20.6754	1100.62	41.2111	1110.64	32.0049
FC-1	54.8951	7.32903	4.53967e+06	346721	836183	2.5238e+06	2.74367e+07	1.93883	2.84376	0.184926	2.05745	13.1453	1.96313	105001	132.393	0.0564323	3.47805	0.331318	3.47607	1093.83	20.6992	1097	39.3283	1109.04	37.5333
FC-1	6.63777	11.654	2.59001e+06	198596	329950	1.01093e+06	1.5662e+07	1.94363	1.86441	0.184811	1.41416	13.1047	1.21497	70635.9	100.492	0.0554886	3.11236	0.326381	3.10541	1093.2	14.2199	1103.18	24.2948	1090.99	33.0548
FC-1	0.228783	17.6966	1.83244e+06	139900	213343	658158	1.10712e+07	1.93455	2.47292	0.184955	1.84282	13.1764	1.64904	49603	117.885	0.0550032	3.15786	0.324152	3.13713	1093.98	18.5423	1092.23	32.9904	1081.69	33.26
FC-1	25.8643	3.04793	1.56922e+06	120117	272664	833651	9.53222e+06	1.9277	2.4322	0.183946	1.49961	13.1511	1.91487	41814.6	280.575	0.0555601	3.25165	0.327072	3.21696	1088.49	15.0195	1096.12	38.2938	1092.35	34.5763
FC-1	11.5817	20.9926	3.30972e+06	252504	521339	1.60398e+06	1.96987e+07	1.96569	1.64896	0.187777	1.11731	13.1656	1.21272	84087.1	179.507	0.0553203	2.77816	0.325029	2.7708	1109.32	11.3867	1093.92	24.252	1087.76	29.4206
FC-1	4.6235	6.89321	2.1574e+06	165770	273495	816947	1.3101e+07	1.93669	2.02701	0.184012	1.27833	13.0947	1.57309	46826.8	376.505	0.0568143	3.45795	0.334777	3.39498	1088.85	12.8071	1104.71	31.4858	1116.34	37.5554
FC-1	13.4128	15.4993	2.10928e+06	162135	324668	1.04158e+06	1.2712e+07	1.95192	2.63153	0.18541	2.19786	13.0913	1.44719	45385.8	80.2153	0.0529409	3.54868	0.311707	3.54109	1096.46	22.1607	1105.24	28.9668	1042.16	36.0453
73119PK2
FC-1	14.214	3.0841	2.63993e+06	201925	515142	1.27839e+06	1.50653e+07	1.94671	2.20384	0.185748	1.23752	13.1503	1.82358	49074.1	219.831	0.0558309	4.94088	0.40296	4.93079	1098.3	12.4969	1096.22	36.5028	1097.54	52.7813
FC-1	59.6254	2.40917	2.65178e+06	203483	462591	1.09452e+06	1.45272e+07	2.03797	2.45742	0.193521	1.23324	13.0871	2.12556	85003.3	884.002	0.0586255	5.26426	0.422642	5.25401	1140.42	12.8904	1105.85	42.4478	1150.94	58.8948
FC-1	46.8076	3.50782	2.22181e+06	168364	467706	1.19913e+06	1.26632e+07	1.93131	2.73652	0.185986	1.28394	13.2722	2.41662	51133.7	96.5116	0.0540598	4.90146	0.390038	4.89868	1099.59	12.9797	1077.74	48.5075	1063.62	50.7843
FC-1	48.4556	14.0706	1.98163e+06	151795	337226	831881	1.13144e+07	1.94669	2.40854	0.185638	1.23076	13.1427	2.07034	39705.7	34.0599	0.0560896	5.00642	0.405378	5.00498	1097.7	12.4224	1097.38	41.4342	1102.49	53.7161
FC-1	34.2607	20.7692	2.32456e+06	176823	461154	1.13121e+06	1.32419e+07	1.94024	2.63343	0.186087	1.50663	13.2182	2.15986	54712.5	783.681	0.056504	7.75599	0.407663	7.74346	1100.14	15.2379	1085.91	43.275	1110.41	83.7994
FC-1	45.4306	6.3036	8.8141e+06	674934	1.4566e+06	3.53299e+06	5.07576e+07	1.93719	2.20524	0.184119	1.47243	13.099	1.64165	185810	4984.22	0.0572507	7.9539	0.412285	7.95155	1089.44	14.759	1104.03	32.8225	1124.68	87.0119
FC-1	35.0047	609.549	2.72185e+06	221591	607419	1.4765e+06	1.54019e+07	1.99266	7.05776	0.186554	1.65239	12.9028	6.86161	3773.86	400.579	0.0550768	8.25576	0.41139	6.8463	1102.68	16.7474	1134.14	136.575	1083.1	87.0637	high 204
FC-1	56.7949	18.1515	938049	72732.9	104883	251162	5.32008e+06	1.97726	4.66087	0.186838	1.66146	13.0231	4.35468	23916.2	333.758	0.0573721	11.4428	0.41759	11.3608	1104.22	16.8609	1115.63	86.8874	1127	125.43
FC-1	6.85917	6.98772	1.70804e+06	129925	275096	682346	9.71291e+06	1.94088	3.30404	0.186391	1.43926	13.2355	2.97409	39721.9	92.3688	0.0557686	7.49379	0.403163	7.48867	1101.8	14.5765	1083.27	59.6096	1096.34	79.9684
FC-1	43.8476	12.788	4.12285e+06	316674	991381	2.50806e+06	2.3382e+07	1.9715	2.20775	0.186941	1.40309	13.0683	1.70455	107630	65.4115	0.0548788	6.90038	0.395279	6.90018	1104.78	14.2456	1108.71	34.0663	1079.31	72.5221
FC-1	35.4929	5.82276	982145	74456.4	135571	323448	5.52352e+06	1.94461	5.8483	0.188379	1.41241	13.351	5.67518	18789.3	192.816	0.0575649	7.57584	0.419143	7.50018	1112.59	14.433	1065.86	114.142	1130.69	83.3062
FC-1	35.8591	4.90722	3.07705e+06	235184	586419	1.46167e+06	1.75763e+07	1.9466	2.53074	0.1856	1.38522	13.1406	2.11798	80940.7	169.315	0.0556555	6.09921	0.4012	6.0969	1097.49	13.979	1097.7	42.3861	1094.18	64.9612
FC-1	32.2962	5.13503	4.82299e+06	368658	952524	2.33105e+06	2.73851e+07	1.95973	2.21427	0.186722	1.44386	13.1314	1.67876	110778	90.9837	0.0567192	6.00349	0.408624	6.00296	1103.59	14.6451	1099.12	33.589	1114.53	65.0982
FC-1	33.2118	6.41678	2.31123e+06	175344	465479	1.17437e+06	1.31096e+07	1.94229	2.55463	0.186879	1.42271	13.2604	2.12179	47432.3	277.503	0.0549168	6.0761	0.396366	6.06577	1104.45	14.4407	1079.51	42.5395	1080.04	63.901
FC-1	14.2025	5.5999	3.90561e+06	299248	804692	2.00942e+06	2.22193e+07	1.95923	2.2799	0.186348	1.28158	13.1085	1.88561	79957.3	262.543	0.05556	6.74345	0.40046	6.74053	1101.56	12.9771	1102.62	37.7459	1092.35	71.7061
FC-1	14.2024	5.41678	917017	72270.8	102365	243813	5.19248e+06	2.0112	5.64059	0.187121	1.26168	12.8227	5.49768	21290.6	4372.66	0.0575978	12.362	0.419849	12.1098	1105.76	12.8202	1146.55	109.251	1131.31	136.01
FC-1	27.6574	20.8367	2.09543e+06	161708	384861	950731	1.1845e+07	1.98147	3.31919	0.18751	1.48274	13.0422	2.9696	41690.3	558.523	0.0560408	8.26901	0.404805	8.24941	1107.87	15.0928	1112.72	59.2966	1101.55	88.6488
FC-1	14.6565	12.78	2.97545e+06	227583	519685	1.27469e+06	1.67733e+07	1.97342	2.52256	0.18806	1.46931	13.1337	2.05047	74282.8	446.09	0.0565352	7.75777	0.407696	7.75139	1110.86	14.993	1098.74	41.0397	1111.01	83.8624
FC-1	28.2524	9.76699	2.59504e+06	199668	475663	1.16736e+06	1.4755e+07	1.96575	2.20963	0.186432	1.17673	13.0709	1.87024	50687.2	145.2	0.0564498	5.81651	0.407468	5.81084	1102.02	11.9199	1108.32	37.3632	1109.37	62.7872
FC-1	17.0826	15.6265	8.0731e+06	621650	1.34907e+06	3.30941e+06	4.65531e+07	1.94525	1.75771	0.18387	1.11542	13.0271	1.35845	172190	124.104	0.056603	5.41221	0.407648	5.41168	1088.08	11.1677	1115.02	27.1524	1112.3	58.5729
FC-1	3.63929	3.82421	2.08394e+06	160390	319744	803020	1.17813e+07	1.97683	2.69508	0.187498	1.28107	13.072	2.37114	46000.6	152.213	0.0551043	6.5491	0.398177	6.54014	1107.81	13.0394	1108.16	47.3561	1083.63	69.0982
FC-1	1.62512	0.753493	3.12532e+06	240669	703070	1.72271e+06	1.76057e+07	1.98766	2.30201	0.188187	1.25156	13.0485	1.93205	66981.4	6739.86	0.0566128	6.435	0.408119	6.42268	1111.55	12.7784	1111.75	38.6195	1112.49	69.6534
FC-1	39.8648	4.10643	2.71655e+06	208900	484770	1.17706e+06	1.53613e+07	1.97732	2.62557	0.187474	1.2359	13.0671	2.3165	66279.6	132.725	0.0570978	6.9116	0.411849	6.90906	1107.68	12.5782	1108.91	46.296	1121.76	75.4186
FC-1	23.5679	11.6409	4.20019e+06	321532	696749	1.7484e+06	2.37019e+07	1.97369	2.34072	0.187871	1.39493	13.1188	1.87966	83969.5	1401.78	0.05527	6.9524	0.398506	6.94192	1109.83	14.2221	1101.01	37.617	1086.8	73.5624
FC-1	46.041	5.08325	3.93388e+06	302425	808547	2.05179e+06	2.24117e+07	1.96385	2.76128	0.186092	1.66842	13.0597	2.20023	95478.9	891.322	0.0546899	6.13347	0.394069	6.12831	1100.17	16.8746	1110.04	43.9636	1075.69	64.2515
FC-1	24.0677	3.33974	3.9961e+06	306781	822594	2.0279e+06	2.28533e+07	1.95412	2.6594	0.185387	1.66565	13.075	2.07318	108058	89.829	0.0563062	6.3784	0.405639	6.37792	1096.34	16.7927	1107.74	41.4494	1106.63	68.6867
FC-1	61.4452	12.4884	1.92431e+06	147057	303664	748511	1.09817e+07	1.94302	2.85056	0.18573	1.32817	13.174	2.52224	39652.2	87.0161	0.0561122	7.38885	0.405691	7.38404	1098.2	13.4112	1092.61	50.5147	1102.92	79.3085
FC-1	38.007	15.4181	3.35263e+06	256107	519491	1.32879e+06	1.90791e+07	1.95167	2.47044	0.186285	1.386	13.1548	2.04502	65597.8	648.455	0.054177	7.30107	0.39095	7.28727	1101.22	14.0304	1095.56	40.939	1065.87	75.8025
FC-1	51.2101	14.7891	3.49259e+06	266191	642261	1.52031e+06	1.97616e+07	1.95897	2.25244	0.187363	1.38865	13.1816	1.77345	71933.8	69.4804	0.0585843	7.48365	0.422454	7.48288	1107.07	14.1258	1091.45	35.4854	1150.15	83.6691
FC-1	49.3789	13.1411	1.59157e+07	1.21728e+06	2.66253e+06	6.51499e+06	9.0546e+07	1.95959	2.00392	0.186379	1.35442	13.1083	1.4769	368089	219.002	0.0567786	7.50388	0.408677	7.50372	1101.73	13.7166	1102.65	29.5345	1115.66	81.4482
FC-1	54.4069	8.52382	2.03037e+06	153118	342862	869619	1.15393e+07	1.92524	2.56867	0.186497	1.39147	13.3505	2.15915	39792.3	145.385	0.0545509	7.98006	0.394267	7.97111	1102.37	14.0993	1065.93	43.4528	1073.03	83.3943
FC-1	61.9144	3.21367	1.70504e+06	129409	299914	750187	9.68286e+06	1.94049	4.06096	0.186652	1.42504	13.2566	3.80272	45900.9	603.753	0.0553575	8.63075	0.399786	8.61288	1103.21	14.4495	1080.07	76.3428	1088.48	91.4578
FC-1	8.80456	17.255	2.64842e+06	202936	537831	1.31489e+06	1.51074e+07	1.95187	2.56195	0.185832	1.36805	13.1215	2.16611	54921.5	168.394	0.056698	7.54617	0.409031	7.54259	1098.76	13.8203	1100.61	43.3401	1114.12	81.7973
FC-1	31.5103	13.776	2.7923e+06	215322	568614	1.40239e+06	1.57856e+07	1.98234	2.549	0.187513	1.34589	13.0367	2.16471	56942.9	200.508	0.0562091	7.38901	0.40546	7.38491	1107.89	13.7	1113.56	43.2198	1104.77	79.4398
FC-1	40.6812	3.46838	3.88076e+06	297099	828979	2.04352e+06	2.22007e+07	1.94837	3.3135	0.18533	2.22379	13.1096	2.45643	117901	176	0.0563186	6.49946	0.405663	6.4986	1096.03	22.414	1102.45	49.1153	1106.87	70.0051
FC-1	67.5984	10.9758	780688	60130.3	89695.3	225072	4.45137e+06	1.946	6.98189	0.185781	2.29105	13.1574	6.59529	16419.4	55.2453	0.0544832	12.8065	0.398518	12.7906	1098.48	23.1394	1095.16	132.068	1071.73	133.675
FC-1	30.8656	10.8381	1.19699e+06	90876.6	183034	470271	6.83703e+06	1.9167	4.1137	0.185472	1.7306	13.3363	3.73196	18101	177.225	0.0534943	8.89687	0.389211	8.84385	1096.8	17.4543	1068.07	75.0454	1052.78	91.2657
FC-1	19.1465	1.49961	736396	55128	80803.3	210162	4.17454e+06	1.92664	7.73594	0.186823	1.6978	13.3642	7.54733	13656.2	150.244	0.0523366	14.4674	0.38448	14.3715	1104.14	17.2286	1063.88	151.826	1030.57	145.358
FC-1	10.4222	2.20904	738581	58845.7	76677.9	197678	4.23684e+06	2.0012	6.72682	0.184656	2.04935	12.7171	6.40705	16090.9	132.128	0.0530758	13.7347	0.389046	13.6625	1092.36	20.5924	1162.93	127.01	1044.75	139.846
FC-1	7.67551	12.4631	1.36736e+06	105644	223293	536320	7.62972e+06	2.00782	4.32527	0.189944	2.01056	13.0381	3.82957	34912.6	107.573	0.0575578	6.77618	0.416342	6.76711	1121.07	20.6888	1113.34	76.4281	1130.55	74.5041
FC-1	27.8405	7.3973	1.46496e+07	1.12039e+06	2.32347e+06	5.79453e+06	8.39796e+07	1.94455	2.02614	0.184966	1.37602	13.1095	1.48722	337745	82.361	0.0557046	6.11365	0.400977	6.11357	1094.05	13.8462	1102.47	29.7412	1095.12	65.1694
FC-1	9.89561	37.9765	1.43423e+06	110051	218325	524067	8.11378e+06	1.95909	3.89283	0.187287	1.46113	13.1754	3.60821	20926.7	1075.59	0.0573437	7.57089	0.416596	7.39669	1106.66	14.8579	1092.38	72.2547	1126.46	82.9492
FC-1	12.5965	7.56359	2.64339e+06	201125	522732	1.30608e+06	1.5134e+07	1.93167	2.32564	0.185159	1.19847	13.2107	1.99305	60528	173.463	0.0554884	6.6396	0.400228	6.63611	1095.1	12.0702	1087.05	39.9288	1090.98	70.5157
FC-1	21.2027	25.9453	1.8933e+06	143793	336057	833118	1.07926e+07	1.9297	2.9692	0.185911	1.22408	13.2778	2.70513	29522.7	578.101	0.0557375	8.22574	0.403372	8.18292	1099.19	12.3704	1076.9	54.2885	1095.75	87.7329
FC-1	29.3549	4.35859	4.74962e+06	364531	927860	2.19236e+06	2.69694e+07	1.96771	2.15398	0.186716	1.28169	13.0777	1.73116	111809	232.722	0.0587457	5.65338	0.423225	5.65161	1103.56	12.9998	1107.28	34.6046	1153.23	63.3706
FC-1	60.8501	3.51508	1.37888e+07	1.05773e+06	2.28707e+06	5.57395e+06	7.81165e+07	1.97369	1.83336	0.187165	1.22455	13.0695	1.36444	367526	221.915	0.0570056	6.05896	0.410314	6.05876	1106	12.4454	1108.54	27.2457	1120	66.0136
FC-1	83.8077	8.10249	1.73614e+06	133194	315152	779151	9.83245e+06	1.96739	2.89931	0.187169	1.3446	13.1116	2.56866	48322.8	675.018	0.0560249	6.07905	0.404481	6.05593	1106.02	13.6658	1102.14	51.3694	1101.25	65.1535
FC-1	48.4671	5.53897	3.98116e+06	304786	820474	2.03445e+06	2.28194e+07	1.94369	2.26965	0.184964	1.40253	13.1151	1.78445	92919	1045.11	0.0559675	5.63784	0.403291	5.63169	1094.03	14.1127	1101.57	35.7273	1100.15	60.3662
FC-1	47.6203	7.938	841029	65310.5	111427	263905	4.75546e+06	1.98484	4.67203	0.187391	1.95546	13.0117	4.24312	21989	281.165	0.0580648	12.4979	0.422223	12.4464	1107.23	19.894	1117.42	84.6371	1140.23	138.559
FC-1	39.1972	7.02246	3.09052e+06	238176	426834	1.05529e+06	1.77318e+07	1.954	3.05723	0.184777	1.92011	13.0328	2.37904	78789.3	913.176	0.0560622	7.69247	0.404473	7.67906	1093.02	19.3044	1114.16	47.5316	1101.96	82.4978
FC-1	43.4622	14.573	2.2535e+06	172224	475022	1.21245e+06	1.28745e+07	1.94274	2.94777	0.185538	1.50829	13.1623	2.53267	48151.5	7127.84	0.0542928	6.30028	0.391788	6.27234	1097.16	15.2167	1094.42	50.7107	1068.09	65.5445
FC-1	30.4612	19.3338	4.60669e+06	349792	881582	2.12281e+06	2.62137e+07	1.94281	2.7026	0.18632	1.48867	13.2173	2.25564	120710	460.485	0.0576488	5.50758	0.41529	5.5047	1101.41	15.0722	1086.05	45.1821	1132.29	60.6463
FC-1	24.472	9.21449	2.60101e+06	199501	472746	1.17445e+06	1.47148e+07	1.97	2.85271	0.187377	1.49718	13.1087	2.42826	54553.8	2374.08	0.055777	7.24936	0.402526	7.22694	1107.15	15.2307	1102.58	48.5557	1096.5	77.3709
FC-1	25.0213	13.426	2.04337e+06	157061	394919	981645	1.16484e+07	1.9559	3.16222	0.185928	1.60309	13.1012	2.72576	37461.9	100.169	0.0556814	7.19794	0.402304	7.19322	1099.28	16.2017	1103.69	54.5011	1094.68	76.6975
FC-1	40.3952	76.3989	1.62577e+06	126458	253243	643111	9.17895e+06	1.9858	4.14087	0.187627	1.50145	13.0218	3.85908	17026	1673.98	0.0540957	8.43276	0.393779	8.17873	1108.51	15.2913	1115.87	77.0103	1064.31	87.4274
FC-1	39.1134	3.15542	1.6371e+06	124945	223285	531662	9.26564e+06	1.95768	3.20363	0.187283	1.52402	13.1846	2.81791	44358.6	678.637	0.0580782	7.64885	0.419976	7.60954	1106.64	15.4972	1090.99	56.4514	1140.49	84.8179
FC-1	20.0124	29.6146	2.96653e+06	225770	614712	1.51505e+06	1.66916e+07	1.96534	3.07738	0.188397	1.87592	13.2114	2.43951	54871	296.505	0.0562445	5.78716	0.405737	5.77906	1112.69	19.171	1086.92	48.863	1105.45	62.2553
FC-1	6.27915	32.1781	1.71974e+07	1.31612e+06	3.5752e+06	8.95073e+06	9.74355e+07	1.96869	2.64697	0.187146	1.86639	13.1013	1.87698	311609	66.8685	0.0554953	5.75547	0.399431	5.75543	1105.89	18.9669	1103.67	37.5246	1091.11	61.133
FC-1	7.33964	10.7632	2.38473e+06	183115	473957	1.20193e+06	1.36981e+07	1.94319	2.94904	0.184552	1.48508	13.0892	2.54781	61242.2	235.433	0.0546731	7.84919	0.394331	7.84482	1091.79	14.9153	1105.55	50.9663	1075.37	82.2008
FC-1	19.7912	5.63621	2.0166e+06	155479	396168	980875	1.15014e+07	1.96223	3.02278	0.185847	1.44909	13.0532	2.6528	42560.1	6297.56	0.0559336	8.18792	0.403893	8.1566	1098.84	14.6399	1111.03	52.9862	1099.5	87.6204
FC-1	68.4987	6.57651	3.16973e+06	242720	635631	1.50203e+06	1.78805e+07	1.97383	2.42631	0.187929	1.4203	13.1219	1.96716	67606.4	100.535	0.0586885	6.76361	0.42318	6.76221	1110.15	14.4845	1100.56	39.3759	1152.14	75.7458
FC-1	46.3424	21.0421	2.02751e+06	157170	376284	919104	1.16151e+07	1.96434	3.23587	0.185025	1.43769	12.9815	2.89895	43151.5	212.602	0.0566873	7.10492	0.409403	7.0952	1094.37	14.4706	1122.04	57.8237	1113.92	77.0006
FC-1	40.5972	12.2253	2.83826e+06	216109	532771	1.30753e+06	1.62103e+07	1.93825	2.47025	0.185613	1.34281	13.1981	2.0734	65186.3	1066.09	0.0564949	7.26218	0.407465	7.25032	1097.57	13.5519	1088.95	41.5103	1110.24	78.4519
FC-1	37.4844	19.9159	2.38817e+06	182802	455536	1.14713e+06	1.36109e+07	1.95108	2.76706	0.185993	1.34509	13.1381	2.41813	51683.7	55.775	0.0550255	7.25984	0.39711	7.2588	1099.63	13.5983	1098.06	48.37	1082.12	76.4932
FC-1	20.0124	15.794	1.36302e+06	103910	191441	470901	7.74865e+06	1.94261	3.5948	0.186422	1.36689	13.2259	3.32478	30132.4	189.543	0.0560959	8.50305	0.406543	8.4782	1101.96	13.8455	1084.77	66.6686	1102.61	91.2428
FC-1	23.6747	19.4562	1.40701e+06	108499	243335	586787	7.97573e+06	1.96997	3.28815	0.186952	1.39857	13.0792	2.97589	28380.2	180.6	0.0572784	6.33964	0.41469	6.31608	1104.84	14.2004	1107.07	59.4873	1125.21	69.3843
FC-1	30.343	1.42494	1.70164e+06	128926	259225	678796	9.79171e+06	1.91198	3.32922	0.184211	1.30701	13.2784	3.06193	47226	5865.56	0.0528543	6.47319	0.381889	6.41974	1089.94	13.1064	1076.82	61.4687	1040.5	65.6487
FC-1	58.5421	7.54739	1.13523e+06	86153.2	160757	408008	6.4257e+06	1.93982	4.68117	0.187215	1.28835	13.3012	4.50039	25567.4	495.586	0.054298	6.63744	0.394004	6.5316	1106.27	13.0968	1073.37	90.4356	1068.18	69.0583
FC-1	43.6339	10.9369	2.65718e+06	205535	536122	1.3366e+06	1.51803e+07	1.96746	3.0335	0.185552	1.87911	12.9978	2.3814	55089.1	547.175	0.0555994	5.35079	0.401109	5.33665	1097.23	18.959	1119.55	47.5245	1093.11	56.9356
FC-1	15.328	3.8949	1.6652e+06	128054	280785	712718	9.55679e+06	1.94496	4.07143	0.18469	1.87352	13.0872	3.61476	42626.8	291.906	0.0545253	5.84837	0.393964	5.82845	1092.55	18.8285	1105.84	72.2535	1072.54	61.0901
FC-1	38.0642	18.3574	1.06367e+06	81040.3	136741	319324	5.98621e+06	1.95546	5.02595	0.188265	1.32426	13.2689	4.84835	21155.2	250.279	0.0588446	9.51837	0.428221	9.44102	1111.97	13.5253	1078.22	97.3194	1155.12	106.864
FC-1	48.1352	2.24382	2.1874e+06	166822	399235	1.00915e+06	1.25336e+07	1.93392	2.48845	0.185003	1.28934	13.1841	2.12838	54418.6	78.5191	0.0548196	7.05079	0.395615	7.04899	1094.25	12.9761	1091.06	42.5968	1078.18	74.027
FC-1	36.0614	7.94734	2.11218e+06	161007	356874	904971	1.20817e+07	1.93349	2.9536	0.1853	1.138	13.2082	2.72556	39138.3	314.562	0.054558	6.69674	0.394349	6.67502	1095.86	11.4685	1087.41	54.5908	1073.17	69.9918
FC-1	39.1742	5.01761	1.48211e+06	112839	261207	648486	8.44582e+06	1.9346	3.40233	0.18597	1.17296	13.2484	3.19375	28463.8	68.479	0.0556429	6.28353	0.402794	6.27745	1099.51	11.8569	1081.33	64.0347	1093.94	66.91
FC-1	40.1089	24.7228	752102	58522.7	91514.9	229642	4.29838e+06	1.98082	6.55665	0.18531	1.44409	12.8934	6.39565	13644.6	163.084	0.054358	9.06079	0.398512	8.93229	1095.92	14.5539	1135.59	127.268	1069.33	94.3706
FC-1	24.3614	17.7646	2.2524e+06	172213	476630	1.16746e+06	1.28059e+07	1.95295	2.73158	0.18644	1.3879	13.1571	2.35272	47705.9	1276.56	0.0565747	6.03217	0.40826	6.00972	1102.06	14.0595	1095.21	47.1004	1111.76	65.2515
FC-1	70.7039	13.4438	1.00176e+06	77536.9	120113	279380	5.56777e+06	2.01589	4.10711	0.190666	1.32973	13.0352	3.88589	26832.3	430.813	0.0591849	9.86151	0.429927	9.7788	1124.98	13.7267	1113.79	77.5476	1161.61	111.321
FC-1	52.5757	3.40222	1.43063e+06	112117	190094	464752	8.06956e+06	2.01635	3.66516	0.187913	1.27282	12.8441	3.43705	40100.7	2379.51	0.056524	8.45043	0.409022	8.38381	1110.06	12.9795	1143.22	68.3607	1110.79	91.3331
FC-1	42.2834	10.9032	2.33093e+06	179048	485805	1.24609e+06	1.32322e+07	1.96589	2.77079	0.186731	1.30958	13.0909	2.44177	52839.8	321.054	0.0540393	5.90978	0.389864	5.90105	1103.64	13.2836	1105.3	48.8136	1063.23	61.2097
FC-1	41.0017	20.0586	2.13437e+06	163285	370008	884967	1.2103e+07	1.95859	3.04469	0.186927	1.34745	13.1535	2.73029	44109.2	289.835	0.0578815	5.74622	0.418104	5.72853	1104.71	13.6798	1095.76	54.6538	1136.73	63.5155
FC-1	57.1573	15.1378	1.43858e+06	108971	224397	535901	8.07711e+06	1.95759	3.22322	0.18878	1.33653	13.2907	2.93306	40090.2	3255.58	0.0579154	6.91101	0.418728	6.85001	1114.76	13.6821	1074.96	58.8587	1137.38	76.4329
FC-1	33.1697	14.5885	2.5358e+06	192786	471046	1.14092e+06	1.43855e+07	1.94769	3.9552	0.186864	1.38035	13.2226	3.70651	58482.3	67.0904	0.0572254	6.58678	0.412866	6.58558	1104.36	14.0098	1085.23	74.2812	1124.2	72.026
FC-1	36.359	9.04048	1.2098e+06	91761.5	153309	372258	6.89836e+06	1.92352	3.51996	0.185835	1.32837	13.315	3.25969	24010.3	81.0201	0.0566619	6.42215	0.411835	6.4023	1098.77	13.4196	1071.28	65.5303	1113.43	69.5714
FC-1	5.04703	26.4358	1.48277e+06	112752	247294	595781	8.42561e+06	1.93961	3.3059	0.186514	1.32105	13.2528	3.03048	32912	276.631	0.0573701	6.64868	0.415075	6.62138	1102.46	13.3867	1080.67	60.7653	1126.97	72.8769
FC-1	67.2628	4.92473	1.30007e+06	99595.8	183060	447289	7.32492e+06	1.97139	4.37379	0.188112	1.40348	13.1509	4.1425	34465.8	315.832	0.0565252	6.97685	0.409266	6.93928	1111.14	14.3246	1096.15	82.9256	1110.82	75.4079
FC-1	31.9223	6.97733	5.79574e+06	444469	1.50482e+06	3.69804e+06	3.29619e+07	1.96317	2.04296	0.186419	1.35881	13.0871	1.52556	116872	275.921	0.0565055	5.74648	0.406923	5.74542	1101.95	13.7635	1105.85	30.5313	1110.44	62.0891
FC-1	43.2561	4.17138	1.54599e+06	119645	256459	628183	8.79357e+06	1.97078	3.57852	0.186317	1.46613	13.0294	3.2644	29288.6	307.695	0.0563858	6.98738	0.408255	6.94979	1101.39	14.8437	1114.67	65.1671	1108.15	75.3455
FC-1	50.0312	5.27003	3.74077e+06	286243	705065	1.67302e+06	2.14722e+07	1.93944	2.40312	0.184695	1.33177	13.1248	2.00034	82463.1	376.9	0.0584632	6.31393	0.421433	6.3092	1092.57	13.3843	1100.12	40.0542	1147.84	70.4534
FC-1	32.1816	9.43545	2.20673e+06	169236	333128	834512	1.26289e+07	1.94526	3.03915	0.185216	1.46315	13.1223	2.66376	43121.3	565.813	0.0552235	6.48942	0.399189	6.45484	1095.4	14.7396	1100.48	53.25	1085.91	68.6089
FC-1	21.7444	11.8159	1.44836e+06	109603	191428	509747	8.355e+06	1.89988	3.30135	0.183715	1.64939	13.3269	2.8598	29342.3	292.095	0.0517822	7.23256	0.375536	7.17834	1087.24	16.5021	1069.48	57.5115	1019.92	71.9352
FC-1	30.4612	1.82694	1.52373e+06	115919	267076	674334	8.73122e+06	1.92522	3.08578	0.184965	1.5042	13.241	2.69433	35672.2	418.513	0.0547797	6.68359	0.396059	6.65303	1094.04	15.1359	1082.45	54.0049	1077.41	70.1234
FC-1	23.8693	6.22154	2.33384e+06	178313	491959	1.23263e+06	1.33066e+07	1.94633	2.8582	0.185915	1.49972	13.1647	2.43314	49389	1476.76	0.0553123	6.39403	0.399114	6.37329	1099.21	15.1562	1094.05	48.7176	1087.61	67.7035
FC-1	16.1214	42.5387	1.74216e+06	133908	311746	796522	9.90604e+06	1.95664	3.17387	0.18637	1.64315	13.1273	2.71543	26761.4	712.683	0.0540506	6.35131	0.391384	6.27305	1101.68	16.6399	1099.75	54.2883	1063.44	65.7957
FC-1	6.96595	7.26687	2.78121e+06	213281	544080	1.38536e+06	1.59068e+07	1.94969	2.45489	0.185355	1.42791	13.1024	1.99688	68299.6	248.505	0.0544641	6.10885	0.392734	6.10422	1096.16	14.3938	1103.53	39.9434	1071.37	63.7431
FC-1	42.8327	2.77826	2.42401e+06	185826	468636	1.21597e+06	1.37413e+07	1.96558	2.75674	0.187001	1.53387	13.1119	2.2906	59623.3	589.559	0.0534274	6.65149	0.385401	6.64028	1105.11	15.5776	1102.1	45.8093	1051.5	68.1513
FC-1	12.9857	6.44044	1.82883e+06	139403	353079	868757	1.03793e+07	1.94822	2.81207	0.186754	1.52454	13.2113	2.36295	37616.7	308.868	0.0562517	7.43922	0.406419	7.423	1103.77	15.4656	1086.94	47.3259	1105.59	80.037
FC-1	59.8047	6.60853	3.81653e+06	290976	663589	1.65218e+06	2.16729e+07	1.95324	2.08956	0.186691	1.2355	13.1728	1.68518	82638.8	174.031	0.0557091	6.41252	0.401646	6.40989	1103.42	12.5299	1092.78	33.7121	1095.21	68.3606
FC-1	34.9016	1.11526	2.49716e+06	191510	458628	1.08291e+06	1.41184e+07	1.97162	2.89574	0.187498	1.32126	13.1065	2.57673	59886.3	143.509	0.0587034	6.65878	0.423514	6.65529	1107.81	13.4485	1102.89	51.5067	1152.42	74.5896
FC-1	49.623	4.53826	2.27817e+06	171434	476870	1.15248e+06	1.29766e+07	1.92066	2.87	0.186111	1.52038	13.3547	2.4342	65381.7	391.679	0.0573853	6.39499	0.413775	6.38869	1100.27	15.3786	1065.3	48.9593	1127.26	70.1137
FC-1	65.0044	1.97474	2.50295e+06	189719	487465	1.22102e+06	1.43463e+07	1.92194	3.08079	0.184946	1.47033	13.2623	2.70728	58686.6	140.255	0.0553426	6.68038	0.399226	6.67736	1093.94	14.7938	1079.25	54.2999	1088.19	70.7722
FC-1	34.3295	15.8851	2.71898e+06	207450	363974	920145	1.55075e+07	1.94502	2.82635	0.185873	1.66989	13.1706	2.28029	66119.4	421.697	0.0547912	6.36535	0.395562	6.34937	1098.98	16.8727	1093.12	45.6652	1077.63	66.7977
FC-1	37.8085	29.6183	1.44752e+07	1.10902e+06	2.37775e+06	5.76887e+06	8.27765e+07	1.95262	2.27849	0.18542	1.59489	13.0873	1.62722	295016	389.997	0.0572557	6.08256	0.412168	6.08204	1096.52	16.0817	1105.83	32.4984	1124.78	66.5458
FC-1	18.4103	17.225	4.02953e+06	309362	830789	2.04678e+06	2.31153e+07	1.94801	2.44513	0.184817	1.49726	13.0757	1.93309	101925	302.117	0.0563378	6.521	0.405901	6.51887	1093.24	15.0559	1107.61	38.6154	1107.23	70.2597
FC-1	51.5534	4.04116	4.09116e+06	313242	714480	1.76955e+06	2.33608e+07	1.95256	2.39853	0.185679	1.5129	13.1061	1.8612	130407	74.9672	0.0560475	6.52931	0.403763	6.52898	1097.93	15.273	1102.97	37.2184	1101.68	70.006
FC-1	57.7715	14.2326	1.85331e+06	141257	368921	920596	1.06164e+07	1.95441	3.15224	0.185041	1.47205	13.0487	2.78741	45395.6	99.6671	0.0555125	7.37984	0.400741	7.37695	1094.46	14.8176	1111.72	55.6676	1091.44	78.4097
FC-1	45.8692	1.23191	2.2045e+06	169145	346668	854685	1.25538e+07	1.95606	3.01471	0.186135	1.49374	13.1147	2.61862	44191.5	98.3435	0.0561288	7.81767	0.405609	7.81315	1100.41	15.1108	1101.67	52.3759	1103.24	83.9348
FC-1	18.6354	8.01531	922212	69899.2	112985	296745	5.2921e+06	1.90188	5.53082	0.184591	1.68916	13.3764	5.26656	16077.1	69.405	0.0520903	12.8828	0.380748	12.861	1092.01	16.968	1062.04	105.975	1025.84	128.858
FC-1	31.0868	8.74775	2.2748e+06	173833	371542	963129	1.29981e+07	1.94245	3.15689	0.185513	1.7844	13.1625	2.6042	49300.5	304.487	0.0534155	6.31811	0.385765	6.30293	1097.02	18.0002	1094.39	52.1426	1051.27	64.7217
FC-1	37.8887	16.9041	1.28833e+06	99403.5	164282	412312	7.17968e+06	2.00475	3.90141	0.190161	1.66575	13.0729	3.52793	27984.8	188.679	0.054903	11.4609	0.398441	11.4364	1122.25	17.1572	1108.01	70.4903	1079.77	120.503
FC-1	39.5367	3.35406	1.48656e+06	114712	263610	629327	8.41991e+06	1.9745	3.63137	0.187114	1.59933	13.0605	3.26021	32015.5	231.05	0.0579064	7.25235	0.418875	7.23143	1105.72	16.2507	1109.9	65.15	1137.21	80.1962
FC-1	36.3284	6.53669	1.65399e+06	126589	261509	654969	9.40378e+06	1.95332	3.14228	0.186426	1.7463	13.1536	2.61235	39925.8	148.371	0.0552265	7.26155	0.39927	7.2513	1101.99	17.689	1095.74	52.293	1085.97	76.7762
FC-1	36.8778	14.5935	737033	55845.9	85743.8	208543	4.14459e+06	2.03534	9.04067	0.188355	1.80277	12.7542	8.8591	14920.9	182.556	0.0561301	14.6439	0.411156	14.5642	1112.46	18.42	1157.15	175.819	1103.26	157.229
FC-1	40.8947	5.55065	754856	57121.4	81358.2	208787	4.31791e+06	1.92825	6.14646	0.185199	2.00011	13.237	5.81193	17645.3	174.072	0.0532806	17.3585	0.38967	17.2964	1095.32	20.1475	1083.05	116.612	1048.68	177.393
FC-1	2.50263	5.80209	2.24783e+06	170438	345251	868858	1.28806e+07	1.92256	3.4453	0.184992	1.95985	13.2613	2.83357	54357.1	176.394	0.0550288	7.34398	0.397362	7.33704	1094.19	19.7233	1079.36	56.8262	1082.18	77.3843
FC-1	33.105	14.2282	1.68711e+06	129013	178327	450345	9.59615e+06	1.95137	3.71143	0.186354	2.05486	13.1617	3.09067	42224.9	342.809	0.0546592	7.88063	0.395979	7.83706	1101.59	20.8078	1094.51	61.8829	1075.1	82.5102
FC-1	60.3885	3.97415	3.92443e+06	299495	808185	2.00562e+06	2.27021e+07	1.9201	3.16249	0.183273	2.0372	13.1548	2.41892	99935.6	624.657	0.0559279	6.85341	0.40296	6.84989	1084.83	20.3407	1095.56	48.424	1099.39	73.3324
FC-1	8.14836	10.7959	1.84543e+06	142075	380950	928072	1.04567e+07	1.97218	3.3968	0.187063	1.51314	13.0724	3.04117	42483	9275.69	0.0568551	6.83268	0.410475	6.79769	1105.45	15.3714	1108.09	60.7732	1117.12	74.2575
FC-1	2.47199	20.6837	2.18866e+06	168054	312611	757057	1.23963e+07	1.96729	2.88575	0.18714	1.50679	13.1102	2.46113	40373.5	236.21	0.0570893	6.94921	0.41293	6.92784	1105.87	15.3122	1102.35	49.2196	1121.6	75.8183
FC-1	35.5387	13.2932	2.32031e+06	178538	493174	1.24679e+06	1.33269e+07	1.94547	2.99371	0.184553	1.49221	13.074	2.59531	47058.6	111.14	0.0548123	6.94863	0.395554	6.94577	1091.8	14.987	1107.84	51.8338	1078.04	72.9453
FC-1	44.5112	7.06754	1.84748e+06	142521	187823	471196	1.05248e+07	1.96533	2.97566	0.186059	1.31307	13.0475	2.67028	41270.4	167.512	0.0549977	9.35337	0.39861	9.33237	1099.99	13.2785	1111.89	53.352	1081.59	98.5047
FC-1	51.9386	20.157	1.69938e+06	129890	197668	485923	9.66983e+06	1.94768	2.6867	0.186262	1.37242	13.1801	2.30972	34889.6	166.6	0.0561119	7.46822	0.406788	7.44066	1101.1	13.8915	1091.67	46.2248	1102.91	80.1599
FC-1	33.0781	6.42385	1.08869e+06	82928.8	156552	399440	6.21165e+06	1.95288	4.34719	0.185693	1.4991	13.1048	4.08054	20098.3	396.089	0.0538937	8.32484	0.391929	8.21441	1098	15.1347	1103.16	81.5647	1060.44	86.0028
FC-1	30.9038	32.3118	3.77651e+06	288152	763428	1.84875e+06	2.1414e+07	1.95681	2.08431	0.18696	1.2076	13.1677	1.69884	70063.4	2177.69	0.0572744	6.39746	0.412944	6.38523	1104.88	12.2618	1093.59	33.9821	1125.14	70.0126
FC-1	1.3237	5.02861	3.82274e+06	293209	670444	1.59115e+06	2.18274e+07	1.95449	2.21221	0.185672	1.28546	13.0926	1.80041	85442.5	314.397	0.0584486	6.55966	0.421359	6.55535	1097.89	12.9765	1105	35.9755	1147.56	73.1781
FC-1	85.5472	1.22445	1.44833e+06	109502	249794	594669	8.2119e+06	1.93525	4.61692	0.186943	2.2011	13.3133	4.05846	41922.6	134.485	0.058138	7.12306	0.420055	7.11629	1104.79	22.3479	1071.55	81.5427	1141.63	79.0641
FC-1	50.3898	30.1556	1.58898e+07	1.21734e+06	2.52799e+06	6.20705e+06	9.13492e+07	1.94241	2.41528	0.184439	1.76298	13.0866	1.65091	348643	172.691	0.0565809	6.16794	0.407278	6.16776	1091.18	17.6973	1105.96	33.0235	1111.88	66.7271
FC-1	26.9936	21.5372	2.87824e+06	220397	583300	1.44454e+06	1.62329e+07	1.97299	2.47184	0.187957	1.43437	13.1294	2.0131	56101	168.272	0.0559754	6.64449	0.403796	6.64058	1110.3	14.6298	1099.42	40.3052	1100.3	71.1542
FC-1	10.6967	3.95877	1.41265e+06	108823	206604	502505	8.01226e+06	1.9653	3.71153	0.186833	1.43791	13.102	3.42168	25586.7	691.859	0.0566766	8.77175	0.411149	8.6863	1104.2	14.592	1103.6	68.4205	1113.71	95.0482
FC-1	53.125	2.9738	930548	67877.4	98777.7	246689	5.28606e+06	1.90571	5.49749	0.186531	1.51065	13.4899	5.28586	22970.4	683.017	0.0549499	10.7495	0.400414	10.5743	1102.56	15.3093	1045.02	106.601	1080.67	113.115
FC-1	51.8433	0.044057	2.49378e+06	189543	340775	844709	1.41486e+07	1.94691	2.50886	0.186844	1.46014	13.2265	2.04019	57748.7	136.468	0.0558562	5.6139	0.403423	5.60664	1104.26	14.8183	1084.67	40.9076	1098.02	59.9965
FC-1	39.3268	1.39934	2.36038e+06	181021	396741	961453	1.34243e+07	1.95852	2.49158	0.186382	1.38603	13.1156	2.07048	48880.5	473.756	0.0571422	7.1842	0.412647	7.16641	1101.74	14.0368	1101.49	41.3941	1122.61	78.4509
FC-1	47.7499	20.4426	7.42877e+06	567268	1.69832e+06	4.14322e+06	4.25792e+07	1.93981	1.93247	0.184977	1.25749	13.1423	1.46736	123537	170.077	0.0569149	7.15091	0.409903	7.1503	1094.11	12.6542	1097.46	29.3373	1118.27	77.7934
FC-1	67.8845	16.0847	2.83049e+06	216907	586615	1.45331e+06	1.6111e+07	1.9578	2.58741	0.186249	1.42697	13.111	2.15835	69446.8	2373.64	0.0559861	6.43293	0.403641	6.42091	1101.02	14.4427	1102.23	43.1523	1100.51	68.9011
FC-1	31.6286	10.4083	2.12842e+06	164185	369486	944745	1.2168e+07	1.95897	3.02814	0.18541	1.44286	13.0442	2.66229	44248.4	141.659	0.0541436	7.05246	0.391096	7.04628	1096.46	14.5482	1112.4	53.1356	1065.23	73.1784
FC-1	59.9574	4.16573	2.4652e+06	188121	492571	1.23172e+06	1.41572e+07	1.93213	2.591	0.184598	1.26004	13.1675	2.26397	67399.6	191.298	0.0554596	6.32136	0.399905	6.31787	1092.04	12.6578	1093.63	45.3362	1090.43	67.1028
FC-1	29.7441	30.625	3.14266e+06	240598	668868	1.69027e+06	1.80962e+07	1.93117	2.34832	0.184086	1.35366	13.1375	1.91891	49821.5	223.408	0.0548443	6.14591	0.395716	6.13933	1089.26	13.5664	1098.16	38.397	1078.65	64.5543
FC-1	46.8954	2.11298	939730	71213.9	101953	262367	5.34687e+06	1.91904	6.74527	0.186181	1.40101	13.371	6.59817	16921.1	600.978	0.0531014	12.9735	0.38859	12.7522	1100.65	14.1756	1062.85	132.765	1045.24	132.156
FC-1	46.163	0.267427	1.96365e+06	150383	357922	844183	1.11984e+07	1.9501	2.68422	0.185871	1.32136	13.1361	2.33646	47055.7	241.885	0.0587217	7.79753	0.423986	7.7886	1098.97	13.351	1098.41	46.7347	1152.77	87.3715
FC-1	7.42362	10.4131	802078	60880	97922.6	254383	4.60574e+06	1.9069	7.97111	0.184498	1.49049	13.3344	7.83052	18795.8	639.506	0.0527835	9.65987	0.384942	9.44955	1091.5	14.9659	1068.35	157.427	1039.14	97.8421
FC-1	25.7347	4.00432	3.03588e+06	233600	549874	1.35645e+06	1.73669e+07	1.95707	2.39675	0.185326	1.31468	13.0509	2.004	85229.2	308.716	0.056235	5.21158	0.405377	5.2065	1096	13.2506	1111.37	40.0468	1105.27	56.0546
FC-1	36.3056	3.53258	1.47944e+06	114699	205283	520930	8.48926e+06	1.95731	3.12857	0.18469	1.81588	13.0046	2.54764	29793.6	128.641	0.0543653	7.27932	0.394071	7.25946	1092.55	18.2493	1118.51	50.8281	1069.47	75.8257
FC-1	34.1081	17.5249	1.96411e+06	150786	326546	812258	1.12639e+07	1.94275	3.18046	0.184824	1.71213	13.1115	2.68029	41010.6	101.282	0.0556276	6.35204	0.402023	6.34575	1093.27	17.2171	1102.15	53.5924	1093.65	67.6219
FC-1	43.3439	18.0192	2.32657e+06	180117	367230	921604	1.3423e+07	1.94982	2.90634	0.183736	1.659	12.9871	2.38633	54540.9	141.634	0.0551881	7.68267	0.398468	7.67779	1087.35	16.5998	1121.2	47.6059	1085.23	81.1752
FC-1	13.6798	4.65224	981963	75985.3	125366	305482	5.54627e+06	1.97877	4.81904	0.187587	1.56805	13.0653	4.5568	20668	119.462	0.056374	9.29117	0.410388	9.25637	1108.29	15.9667	1109.17	91.0087	1107.92	100.168
FC-1	32.7501	3.36611	3.94348e+06	303710	644850	1.62334e+06	2.26981e+07	1.94775	2.5564	0.184197	1.45596	13.0335	2.10128	106344	515.483	0.0551183	6.69626	0.397237	6.69178	1089.86	14.5991	1114.04	41.9509	1083.9	70.6678
FC-1	111.305	13.6202	2.43786e+06	186316	475982	1.13587e+06	1.37586e+07	1.96671	2.61304	0.18782	1.34885	13.1618	2.23799	48493.4	710.316	0.0580575	7.25354	0.419046	7.23694	1109.56	13.7491	1094.5	44.8092	1140.1	80.4071
FC-1	33.6009	1.51252	2.39855e+06	181493	481140	1.21233e+06	1.38123e+07	1.909	2.98429	0.184079	1.33779	13.2896	2.66764	53241.5	197.051	0.0550057	6.67152	0.396872	6.66628	1089.22	13.4069	1075.12	53.5677	1081.74	70.2705
FC-1	13.2756	7.00578	846381	64404.5	108107	278717	4.86803e+06	1.91208	5.74273	0.184225	1.34069	13.2787	5.58404	22482.5	336.676	0.0533323	11.3913	0.387875	11.3217	1090.02	13.445	1076.77	112.154	1049.67	116.518
FC-1	27.1004	10.9242	1.10728e+06	83216.2	132940	321281	6.33337e+06	1.90058	3.6847	0.185265	1.20289	13.4345	3.48282	25110	305.688	0.056924	8.32966	0.413781	8.24493	1095.68	12.1206	1053.32	70.1911	1118.44	90.6306
FC-1	23.072	0.245386	2.70284e+06	206598	552765	1.34926e+06	1.54472e+07	1.94425	2.68712	0.185487	1.26058	13.1484	2.37309	62526	327.309	0.0568083	6.65881	0.40968	6.65275	1096.88	12.7147	1096.52	47.499	1116.23	72.3114
FC-1	21.279	4.93017	2.27145e+06	174116	470794	1.16723e+06	1.30744e+07	1.93464	2.97629	0.184161	1.63165	13.1193	2.48918	51683.3	170.168	0.0559033	7.24468	0.403344	7.24048	1089.67	16.3581	1100.93	49.7742	1098.92	77.4868
FC-1	30.9838	6.94436	897736	69662.7	98175.9	230776	5.13375e+06	1.96064	4.95016	0.185283	1.67992	13.0242	4.65639	21446.8	248.191	0.058351	10.6373	0.425417	10.5466	1095.77	16.9286	1115.47	92.9132	1145.7	118.48
FC-1	8.25526	0.226265	2.92903e+06	224186	628648	1.54125e+06	1.6774e+07	1.94298	2.3826	0.18511	1.47829	13.1303	1.86854	63485.1	912.644	0.0565674	6.15295	0.407882	6.14225	1094.83	14.8851	1099.26	37.3887	1111.62	66.55
FC-1	8.25524	8.19674	3.22381e+06	245827	647380	1.62066e+06	1.8501e+07	1.93196	2.59387	0.184724	1.47296	13.1776	2.13508	66934.6	115.399	0.0553968	6.13385	0.399454	6.13197	1092.73	14.8053	1092.05	42.7261	1089.23	65.0425
FC-1	31.6477	10.7745	1.13643e+06	86806.6	143762	338326	6.36581e+06	1.97354	4.0614	0.18918	1.4187	13.2112	3.80555	26433.9	2682.2	0.0585173	8.63234	0.424922	8.46023	1116.93	14.5491	1086.96	76.2756	1148.87	96.4074
FC-1	32.1971	7.84472	1.57693e+06	119531	300109	751145	8.97986e+06	1.93069	3.82098	0.186126	1.32295	13.2864	3.58465	37308.8	286.984	0.0552935	6.87306	0.399535	6.85587	1100.36	13.3826	1075.61	71.9772	1087.25	72.7523
FC-1	48.7495	17.8123	4.62496e+06	352195	866541	2.10323e+06	2.64506e+07	1.93839	2.53333	0.185382	1.74933	13.1807	1.83237	111910	84.7053	0.0571851	7.1075	0.412006	7.10706	1096.31	17.636	1091.59	36.6651	1123.43	77.6683
FC-1	48.3834	11.4035	5.06929e+06	387128	981600	2.58863e+06	2.9335e+07	1.9212	2.70967	0.183213	1.778	13.143	2.04475	113179	151.902	0.0526346	6.99073	0.379197	6.98983	1084.5	17.7477	1097.34	40.9223	1036.29	70.6173
FC-1	59.4462	23.5344	4.92708e+06	375949	677797	1.67062e+06	2.82779e+07	1.93528	2.20281	0.18473	1.42747	13.1555	1.67771	106854	882.066	0.0562762	5.78296	0.405715	5.77322	1092.76	14.3484	1095.46	33.5495	1106.06	62.2433
FC-1	41.8676	21.7033	2.56667e+06	197807	422466	1.07043e+06	1.47361e+07	1.95058	2.75021	0.184637	1.48231	13.0457	2.31655	55242.1	107.472	0.0546726	6.32471	0.394669	6.32107	1092.26	14.8933	1112.18	46.222	1075.36	66.235
FC-1	14.0156	14.9559	1.38515e+06	106717	232902	600332	8.02636e+06	1.92581	3.96689	0.18289	1.2654	13.0884	3.75965	29302.4	957.695	0.0535866	6.46681	0.387956	6.38557	1082.74	12.6123	1105.67	75.1507	1054.55	66.4465
FC-1	42.5809	6.34978	2.96237e+06	227722	623433	1.53937e+06	1.68963e+07	1.95988	2.33083	0.185866	1.3202	13.0702	1.9209	69187.4	307.301	0.0561748	5.60407	0.404992	5.59888	1098.94	13.339	1108.42	38.359	1104.12	60.2149
FC-1	64.31	13.337	5.34694e+06	410275	1.06031e+06	2.60362e+06	3.1053e+07	1.92409	2.21606	0.182562	1.47421	13.0766	1.65458	139564	155.353	0.0565442	6.29055	0.407243	6.2899	1080.95	14.6711	1107.45	33.0634	1111.18	68.0118
FC-1	28.2372	18.281	4.75604e+06	364227	876179	2.15362e+06	2.77702e+07	1.9089	2.37935	0.181574	1.63473	13.1094	1.72886	98169.8	238.973	0.0564545	6.40759	0.406839	6.40523	1075.57	16.1941	1102.48	34.6056	1109.46	69.1731
FC-1	29.1185	3.0566	1.81279e+06	138559	305932	761600	1.04022e+07	1.93477	2.89215	0.184729	1.383	13.1588	2.54005	49986.3	174.556	0.0556312	6.81763	0.401696	6.8103	1092.76	13.9013	1094.94	50.8556	1093.71	72.583
FC-1	47.0632	24.4803	1.57876e+07	1.20834e+06	2.62374e+06	6.42738e+06	9.09641e+07	1.93602	1.96956	0.184028	1.39728	13.1004	1.38808	299019	102.813	0.0567072	5.91284	0.408213	5.91272	1088.94	13.9999	1103.81	27.776	1114.3	64.1025
FC-1	30.9687	0.287408	2.9056e+06	222826	553681	1.38045e+06	1.66728e+07	1.94213	2.5636	0.184738	1.62979	13.1096	1.97885	56190.3	156.878	0.0555905	7.02801	0.401088	7.02423	1092.81	16.3826	1102.44	39.5741	1092.94	74.7709
FC-1	38.1099	2.85092	2.96965e+06	226595	592056	1.46225e+06	1.70655e+07	1.93053	2.67793	0.184474	1.65346	13.1695	2.10652	65928.6	159.704	0.0561484	6.87918	0.404895	6.87648	1091.37	16.6005	1093.28	42.1462	1103.61	73.883
FC-1	35.3099	6.94797	3.90119e+06	298065	805690	2.02714e+06	2.26038e+07	1.91957	2.53198	0.182982	1.59614	13.1376	1.96552	108974	224.672	0.0551704	6.0068	0.397451	6.0053	1083.24	15.9154	1098.14	39.3689	1084.89	63.4486
FC-1	29.9997	2.73648	3.35142e+06	257903	669549	1.67842e+06	1.92041e+07	1.95179	2.65365	0.184998	1.59407	13.0631	2.12151	57870.6	50.9256	0.0553015	6.24333	0.398917	6.2426	1094.22	16.0426	1109.51	42.352	1087.4	66.0955
FC-1	22.6752	19.2567	1.58816e+06	121386	272895	650929	9.09372e+06	1.9358	3.92762	0.185102	1.81428	13.1784	3.48348	35935.2	339.033	0.0579821	8.25558	0.419239	8.23435	1094.79	18.2674	1091.93	69.7361	1138.66	91.4027
FC-1	1.12911	6.25597	2.52265e+06	192076	413289	1.00906e+06	1.43853e+07	1.94184	2.3484	0.185908	1.26462	13.1946	1.97882	71993.3	1076.97	0.0567824	8.10254	0.409578	8.091	1099.17	12.7799	1089.48	39.6098	1115.73	87.9519
FC-1	19.0931	12.9372	1.42479e+06	109352	248133	593120	7.99459e+06	1.98129	3.41603	0.188872	1.45185	13.1381	3.09215	29588.9	1695.88	0.0578018	7.36072	0.418352	7.28667	1115.26	14.8687	1098.06	61.8711	1135.21	81.2555
FC-1	11.9518	20.4447	1.26044e+06	95731.7	173914	440563	7.19524e+06	1.92608	5.1344	0.185641	1.4383	13.2835	4.92883	27544	250.777	0.0544236	9.13193	0.394755	9.09387	1097.72	14.5174	1076.05	98.9922	1070.59	95.2205
FC-1	24.3843	23.1617	3.19901e+06	245119	726382	1.97908e+06	1.85904e+07	1.91747	2.41449	0.182423	1.50567	13.1119	1.88752	70770.9	62.6323	0.0509195	7.27285	0.367031	7.2724	1080.2	14.9746	1102.1	37.7865	1003.34	71.1893
FC-1	21.2713	3.93834	2.30954e+06	175606	387198	949687	1.31472e+07	1.93878	2.3535	0.186202	1.32501	13.2363	1.94507	42935.4	173.138	0.0564284	7.13848	0.407711	7.1289	1100.77	13.408	1083.14	39.0089	1108.97	77.0298
FC-1	35.2946	16.1101	2.73347e+06	209752	449733	1.13144e+06	1.55836e+07	1.95659	2.55823	0.185947	1.32833	13.0979	2.18634	61590.4	133.697	0.0550825	7.37199	0.397488	7.36855	1099.38	13.426	1104.23	43.7253	1083.21	77.7513
FC-1	42.9852	8.41956	1.80266e+06	137200	272866	675929	1.03048e+07	1.93291	3.22533	0.185427	1.4284	13.2213	2.89178	44494.4	179.263	0.0558552	8.42518	0.40369	8.41551	1096.55	14.4034	1085.44	57.9415	1098	90.0397
FC-1	54.8875	5.76813	1.50336e+06	117406	243882	593529	8.57817e+06	1.98276	3.05128	0.185731	1.33011	12.91	2.74611	29646.2	76.8363	0.0567474	8.72679	0.410901	8.72108	1098.21	13.4309	1133.05	54.6534	1115.07	94.6728
FC-1	40.9712	9.79652	1.07413e+06	84062.8	140802	349693	6.09272e+06	1.99457	4.5343	0.186802	1.31963	12.9076	4.33802	22506.1	159.53	0.0553795	9.94009	0.402643	9.8992	1104.03	13.3898	1133.41	86.4023	1088.9	105.372
FC-1	24.9907	0.145022	3.44102e+06	263596	502159	1.23031e+06	1.96397e+07	1.95092	1.97355	0.185735	1.13419	13.121	1.61509	60580.5	100.519	0.0565356	6.07078	0.408157	6.06722	1098.23	11.4528	1100.67	32.3062	1111.01	65.6262
FC-1	28.4699	8.46107	1.70236e+07	1.30384e+06	3.45284e+06	8.46647e+06	9.67557e+07	1.96455	1.71751	0.186561	1.21783	13.0879	1.21109	528998	9219.84	0.0566723	5.91593	0.407825	5.91566	1102.72	12.3434	1105.72	24.2061	1113.63	64.0986
FC-1	18.3607	0.532339	1.33434e+06	104774	227723	601409	7.71375e+06	1.96918	3.97412	0.183333	1.72365	12.8312	3.58087	33148.1	204.94	0.0523441	8.00366	0.37865	7.98682	1085.16	17.2148	1145.23	71.202	1030.71	80.4256
FC-1	20.1919	0.383204	2.42001e+06	186538	475348	1.22083e+06	1.39677e+07	1.94159	3.18026	0.183669	1.65721	13.0374	2.71435	63838.6	78.9187	0.0539885	7.23909	0.389365	7.238	1086.99	16.5768	1113.45	54.2261	1062.25	74.9109
FC-1	18.9901	8.64189	4.27638e+06	329116	750568	1.86818e+06	2.45479e+07	1.95182	2.01726	0.184696	1.21989	13.0416	1.60662	112092	1108.65	0.0557581	5.70854	0.401764	5.70258	1092.58	12.26	1112.8	32.1005	1096.14	60.9065
FC-1	6.64538	11.3885	3.17403e+06	243132	430104	946986	1.81061e+07	1.95193	2.22163	0.185836	1.23553	13.1213	1.84638	60965.3	404.328	0.0628952	6.73436	0.454182	6.71749	1098.78	12.4818	1100.63	36.938	1232.25	80.5042
FC-1	58.0804	8.18764	1.82911e+06	139706	307191	769357	1.04757e+07	1.93436	3.08655	0.185062	1.40156	13.1854	2.74998	37108.3	4908.04	0.0552247	6.91345	0.399282	6.84762	1094.57	14.1093	1090.87	55.0904	1085.93	73.0934
FC-1	22.0076	5.2579	2.32963e+06	178277	486813	1.22826e+06	1.32863e+07	1.94817	2.9051	0.185858	1.30574	13.1482	2.59512	45190.8	98.1182	0.0549117	7.00288	0.396345	7.00029	1098.9	13.1924	1096.54	51.908	1079.94	73.6412
FC-1	26.223	13.735	802676	62709.8	89644.1	227460	4.61441e+06	1.95984	4.64909	0.184278	1.433	12.9588	4.42273	17694.6	1479.13	0.0539209	13.4681	0.394109	13.1845	1090.3	14.3742	1125.5	88.1154	1060.96	139.204
FC-1	40.1394	5.31198	4.02608e+06	310110	830379	2.03311e+06	2.32683e+07	1.9393	2.15972	0.18344	1.35401	13.0365	1.68257	88336.8	226.03	0.0566757	6.53333	0.408428	6.53118	1085.74	13.5296	1113.58	33.5915	1113.69	70.7922
FC-1	52.343	18.1562	2.91109e+06	221895	585608	1.4578e+06	1.65437e+07	1.94959	2.61049	0.186536	1.50546	13.1865	2.13266	60702.4	158.916	0.0556962	8.1421	0.401707	8.13954	1102.58	15.257	1090.7	42.6875	1094.96	86.7798
FC-1	35.4968	12.846	3.54311e+06	269662	825999	2.08216e+06	2.03795e+07	1.9241	2.46833	0.184307	1.44121	13.2016	2.00389	69080.3	1699.2	0.0550363	8.15858	0.396702	8.15156	1090.46	14.4585	1088.43	40.1209	1082.33	85.9789
FC-1	18.3339	1.82592	1.00638e+06	77660.2	112287	273515	5.73275e+06	1.95926	5.77492	0.18602	1.26874	13.0852	5.63383	24073.7	1288.63	0.0564053	9.95155	0.410532	9.75172	1099.78	12.828	1106.16	112.585	1108.52	107.344
FC-1	44.7019	258.556	1.63842e+06	130343	274174	638492	9.35405e+06	1.95615	5.56478	0.185129	1.33493	13.0432	5.40229	5192.25	364.329	0.0575557	8.3665	0.429409	7.19293	1094.93	13.4426	1112.56	107.853	1130.51	91.9865
FC-1	27.8596	0.107397	2.44562e+06	187451	492486	1.21359e+06	1.39841e+07	1.94792	2.66505	0.185389	1.25955	13.1167	2.34862	56154.3	88.1056	0.0562535	7.89282	0.405809	7.89139	1096.35	12.6987	1101.33	46.9901	1105.62	84.9198
FC-1	35.9163	37.43	3.82291e+06	294917	877089	2.19577e+06	2.21413e+07	1.93323	2.38728	0.18301	1.33595	13.0468	1.97847	41670.8	641.637	0.0553432	8.12354	0.399444	8.10961	1083.4	13.3228	1112.01	39.5182	1088.2	86.0621
FC-1	38.1518	12.0069	2.41284e+06	185848	462070	1.13753e+06	1.37569e+07	1.96282	3.03518	0.185922	1.61032	13.0546	2.57277	53300.8	475.053	0.0562916	7.54842	0.406204	7.53773	1099.25	16.2744	1110.81	51.4262	1106.35	81.2664
FC-1	38.5181	6.69676	2.55519e+06	196440	543271	1.38023e+06	1.4665e+07	1.94627	2.66513	0.184699	1.63683	13.079	2.10326	53828.3	331.902	0.0545641	7.5295	0.393609	7.52284	1092.59	16.4504	1107.1	42.0696	1073.28	78.7037
FC-1	75.3844	27.2645	1.75495e+07	1.34469e+06	3.63215e+06	8.82937e+06	1.00607e+08	1.94796	1.74666	0.184958	1.19706	13.0859	1.27195	295762	50942.9	0.0571526	6.04394	0.411371	6.0431	1094	12.045	1106.04	25.4213	1122.81	66.0106
FC-1	38.0298	9.31991	2.56744e+06	198092	501915	1.233e+06	1.49197e+07	1.92921	2.47601	0.182417	1.39639	13.0316	2.04468	54193.1	416.886	0.0564175	6.56265	0.407069	6.55197	1080.16	13.8873	1114.34	40.7812	1108.76	70.8033
FC-1	27.8405	14.0431	8.17893e+06	628251	1.34609e+06	3.29965e+06	4.77962e+07	1.91519	2.89604	0.181439	1.94042	13.0566	2.14983	211764	1793.93	0.0566553	7.83541	0.407949	7.83381	1074.83	19.2103	1110.5	42.9045	1113.3	84.872
FC-1	33.3339	17.156	8.51795e+06	652913	1.15553e+06	2.64493e+06	4.83885e+07	1.96563	2.85857	0.186644	1.94781	13.0866	2.09224	175985	116.023	0.0606491	7.76613	0.436885	7.76566	1103.17	19.7496	1105.96	41.7815	1189.52	89.7125
FC-1	50.4813	4.28068	1.58514e+06	123332	246200	584071	8.95697e+06	1.99906	3.29462	0.187586	1.47184	12.9327	2.94758	43793.4	152.719	0.0583256	7.27547	0.421524	7.26656	1108.29	14.987	1129.54	58.709	1145.21	81.0021
FC-1	11.6618	3.04367	2.81657e+06	216417	402468	982945	1.60991e+07	1.95525	2.54009	0.185475	1.46161	13.0736	2.07744	74674.3	310.749	0.0567491	7.05776	0.409451	7.05	1096.81	14.7416	1107.91	41.53	1115.1	76.5683
FC-1	19.1859	0.0181021	766860	57743.3	86869.7	222879	4.44209e+06	1.87575	4.8036	0.182901	1.55871	13.4385	4.54367	19386.2	388.522	0.0534112	18.329	0.389762	18.2416	1082.8	15.5364	1052.71	91.5491	1051.18	187.746
FC-1	30.7218	7.15934	1.93781e+06	147760	388553	973410	1.10187e+07	1.9478	2.40339	0.18642	1.11919	13.1905	2.1269	50072.9	93.1043	0.0553136	5.61889	0.399167	5.6161	1101.95	11.3365	1090.14	42.5751	1087.64	59.4971
FC-1	25.7778	13.0188	1.63948e+06	125126	278771	701535	9.41028e+06	1.92881	3.31687	0.184659	1.37438	13.1945	3.01873	37734.7	2785.93	0.0549685	6.11267	0.397373	6.04724	1092.38	13.8103	1089.51	60.4863	1081.03	64.3429
FC-1	27.9752	7.52555	1.10807e+06	83771.9	170198	412883	6.12764e+06	1.97951	4.64252	0.191636	1.45129	13.3423	4.40985	28455.3	149.377	0.0568929	7.12717	0.412218	7.10463	1130.23	15.0455	1067.16	88.6615	1117.85	77.5068
FC-1	3.33674	20.16	2.59725e+06	197842	535623	1.30841e+06	1.48333e+07	1.93823	2.23662	0.185612	1.16612	13.1981	1.90857	56733.5	78.4387	0.0567521	5.93827	0.409368	5.93679	1097.56	11.7686	1088.95	38.206	1115.16	64.4264
FC-1	11.6783	9.17353	2.75898e+06	210054	450050	1.12354e+06	1.58026e+07	1.93175	2.46336	0.185077	1.30935	13.2043	2.08656	57497.2	175.655	0.0554949	6.02146	0.400563	6.01476	1094.65	13.182	1088.04	41.7795	1091.11	63.9579
73119PK3
FC-1	25.9751	10.7001	2.61207e+06	198989	514783	1.83945e+06	1.5543e+07	1.93236	2.25518	0.184889	1.56034	13.1867	1.62824	60818.2	88.9176	0.0565244	3.29358	0.279856	3.29044	1093.63	15.6954	1090.67	32.5953	1110.8	35.5976
FC-1	23.6479	13.2636	1.34576e+06	102196	224104	817517	8.04136e+06	1.91105	2.89568	0.184063	1.48287	13.2741	2.48718	28793.2	969.048	0.0551515	4.87071	0.274128	4.75784	1089.13	14.8598	1077.45	49.9246	1084.53	51.4316
FC-1	65.2141	11.0663	1.61563e+06	124256	249755	837056	9.56309e+06	1.95584	2.4872	0.185826	1.51876	13.0944	1.96966	33240	119.687	0.0600559	4.12809	0.298373	4.10916	1098.73	15.3424	1104.75	39.3762	1178.21	47.2467
FC-1	83.8914	21.3204	2.33285e+06	178315	486357	1.758e+06	1.3858e+07	1.94245	2.36873	0.185206	1.57704	13.1406	1.76744	63594.9	106.088	0.0558914	3.89474	0.276653	3.89197	1095.35	15.8862	1097.7	35.371	1098.69	41.6485
FC-1	25.357	5.5148	3.17424e+06	244016	631340	2.31281e+06	1.87764e+07	1.96353	1.93073	0.186005	1.33017	13.0556	1.39941	86313.6	131.753	0.0551779	4.03775	0.272976	4.03568	1099.69	13.4481	1110.66	27.9641	1085.04	42.6555
FC-1	50.077	4.96548	1.49217e+06	113730	263633	902401	8.79401e+06	1.94734	2.42238	0.186641	1.28839	13.2093	2.05134	35404.3	833.994	0.0588663	5.01444	0.292146	4.95445	1103.15	13.0633	1087.25	41.0781	1155.53	56.3175
FC-1	22.3358	3.95965	2.62286e+06	199957	539639	1.94755e+06	1.5591e+07	1.9348	2.2879	0.185073	1.5024	13.1831	1.72548	52841.4	75.6423	0.05595	4.90439	0.277086	4.90246	1094.63	15.1252	1091.21	34.5268	1099.81	52.4972
FC-1	59.5072	25.8871	1.74879e+07	1.33869e+06	3.65246e+06	1.31e+07	1.01602e+08	1.99416	2.18172	0.189407	1.69903	13.0903	1.36865	331426	198.656	0.0564349	3.48605	0.278814	3.48581	1118.16	17.4416	1105.4	27.3967	1109.09	37.6213
FC-1	37.4767	7.2866	2.29679e+06	176507	384452	1.31798e+06	1.35092e+07	1.97248	2.06602	0.187051	1.38614	13.0695	1.53201	64078	142.77	0.0588983	4.09534	0.291698	4.0895	1105.38	14.0805	1108.53	30.6085	1156.14	46.0186
FC-1	29.7861	17.9069	791162	61232.1	103626	355140	4.67401e+06	1.95707	4.08643	0.186064	1.58699	13.103	3.76568	14724	1159.08	0.0581362	5.3519	0.291788	4.62214	1100.02	16.049	1103.44	75.2639	1141.6	59.403
FC-1	4.51673	13.4715	2.46584e+06	189733	420831	1.43564e+06	1.45038e+07	1.97316	2.18751	0.187034	1.36092	13.0638	1.71262	50068.4	263.554	0.0591438	5.12156	0.293131	5.10742	1105.29	13.8232	1109.4	34.2252	1160.83	57.7766
FC-1	12.5126	12.3729	1.89011e+06	146253	356506	1.23334e+06	1.118e+07	1.97216	2.18369	0.185978	1.28329	12.9967	1.76682	44196.7	86.5887	0.0583167	4.28941	0.289059	4.28482	1099.55	12.9727	1119.73	35.2422	1145.04	47.7496
FC-1	37.511	2.80617	1.41129e+06	109333	245362	815345	8.14464e+06	2.01942	2.58265	0.190583	1.35882	13.0068	2.19629	29983.9	347.912	0.0605764	4.53158	0.300931	4.47622	1124.53	14.0218	1118.18	43.8363	1188.13	52.2885
FC-1	25.9751	0.242652	1.69418e+06	130147	286543	1.05021e+06	1.01051e+07	1.94024	2.42154	0.184421	1.36709	13.0999	1.99872	38324.3	253.031	0.0549866	3.73818	0.272844	3.70435	1091.08	13.7221	1103.93	39.9616	1081.37	39.3609
FC-1	30.1751	7.16295	2.41224e+06	184511	483970	1.74544e+06	1.43063e+07	1.94599	1.95511	0.185498	1.26335	13.1374	1.49211	55043.2	207.349	0.0559911	4.20332	0.277277	4.19512	1096.94	12.7432	1098.17	29.8566	1100.6	45.0242
FC-1	66.6144	8.81093	1.31208e+06	99985.5	194755	675451	7.74858e+06	1.94486	2.24631	0.186273	1.28037	13.1999	1.84568	42580.6	231.435	0.0581011	4.67064	0.288334	4.64446	1101.15	12.9604	1088.67	36.9658	1140.93	51.8119
FC-1	76.8267	2.26445	2.44141e+06	186437	480087	1.68925e+06	1.44814e+07	1.94259	2.41199	0.185472	1.66079	13.1586	1.74914	55559.2	181.818	0.0573874	3.93897	0.284201	3.931	1096.8	16.7503	1094.98	34.9986	1127.3	43.1877
FC-1	76.6435	18.5611	3.2878e+06	251075	488600	1.77803e+06	1.94893e+07	1.94527	2.30037	0.185604	1.66346	13.1498	1.5889	69074.8	105.593	0.0554787	3.66844	0.274798	3.66363	1097.52	16.7872	1096.31	31.7663	1090.8	38.9541
FC-1	35.9928	11.3638	1.08223e+06	84033.2	125080	433085	6.37873e+06	1.9786	3.16692	0.18658	1.3361	12.9963	2.87128	24058.8	453.952	0.0578316	4.57777	0.288811	4.32737	1102.82	13.5434	1119.78	57.2744	1135.78	50.5589
FC-1	36.3589	14.6598	1.93518e+06	149038	380024	1.35217e+06	1.14342e+07	1.96567	2.11303	0.186184	1.29432	13.054	1.67022	47881.8	892.033	0.0567246	4.70186	0.281048	4.67264	1100.67	13.0963	1110.9	33.322	1114.63	50.9888
FC-1	40.315	5.96758	1.65457e+06	125815	191578	682198	9.83366e+06	1.92674	2.96783	0.185078	1.87621	13.2386	2.29954	36241	4606.12	0.0564465	5.09672	0.280825	4.89851	1094.65	18.8889	1082.82	46.1144	1109.31	55.0142
FC-1	48.555	6.5169	2.64002e+06	203028	508117	1.8304e+06	1.56735e+07	1.95604	2.73705	0.185318	1.89062	13.0573	1.97913	69511.2	430.309	0.0560837	4.0458	0.277599	4.03472	1095.96	19.0549	1110.4	39.5624	1102.37	43.4048
FC-1	30.1294	3.3657	3.49649e+06	267246	800440	2.78206e+06	2.03535e+07	1.98293	2.97177	0.189004	2.62565	13.1364	1.39189	72760	564.155	0.0581541	4.65904	0.287715	4.65156	1115.98	26.9057	1098.36	27.8132	1141.94	51.7276
FC-1	42.2147	7.62081	1.00996e+06	76467	115852	411972	5.96179e+06	1.92646	3.81634	0.186302	2.66499	13.3281	2.73172	24825.1	880.81	0.0563254	4.98981	0.281214	4.69062	1101.31	26.9796	1069.31	54.9015	1107	53.7509
FC-1	44.6409	2.27856	2.17618e+06	167235	336478	1.18406e+06	1.29972e+07	1.94112	2.21553	0.184199	1.46881	13.0782	1.65866	52337.6	256.744	0.0573244	4.42427	0.284173	4.40637	1089.88	14.7282	1107.22	33.145	1126.09	48.4583
FC-1	54.1628	18.0465	2.06752e+06	159013	333088	1.20823e+06	1.22443e+07	1.95828	2.33085	0.185755	1.5147	13.0731	1.7716	46811.7	201.769	0.0555964	4.83923	0.275683	4.82404	1098.34	15.2965	1107.98	35.4242	1093.05	51.4896
FC-1	63.5739	18.3505	2.62225e+06	201055	510549	1.86806e+06	1.56017e+07	1.94507	2.37403	0.184911	1.62361	13.1021	1.73203	60317.9	1482.44	0.0551981	4.43593	0.273304	4.41244	1093.75	16.3335	1103.59	34.6315	1085.42	46.8781
FC-1	65.0388	24.0268	1.48754e+06	112909	243042	878156	8.8015e+06	1.93178	2.70815	0.185905	1.57953	13.2631	2.19981	36072	145.381	0.0557497	5.10585	0.276764	5.08978	1099.15	15.962	1079.11	44.1073	1095.98	54.4684
FC-1	23.7739	9.43498	1.59105e+06	121200	272467	932994	9.43558e+06	1.93504	2.57579	0.185485	1.52922	13.2108	2.07272	38568.6	69.9604	0.0588593	4.11004	0.292035	4.10425	1096.87	15.4241	1087.04	41.5082	1155.4	46.1549
FC-1	19.013	1.36843	3.97535e+06	303684	640113	2.18724e+06	2.32363e+07	1.97425	2.14649	0.188235	1.50167	13.1405	1.53376	80026.7	104.816	0.0591211	5.13163	0.292659	5.12949	1111.81	15.3353	1097.74	30.6658	1160.39	57.8691
FC-1	25.1816	9.98363	2.72783e+06	207588	520914	1.85799e+06	1.61166e+07	1.94371	2.02487	0.186208	1.37062	13.2032	1.49048	57199.2	533.724	0.0566128	4.79646	0.280364	4.78018	1100.8	13.8698	1088.17	29.8517	1112.49	51.9176
FC-1	45.5069	17.308	2.42909e+06	184881	488085	1.70892e+06	1.43294e+07	1.94637	1.99294	0.186492	1.39388	13.2052	1.42439	52402.5	83.973	0.0576659	4.45372	0.28561	4.45099	1102.34	14.1234	1087.9	28.5481	1132.62	49.0556
[truncated: 631 more rows]

## Sheet: Table S3 (secondary RMs)
U-Pb geochronologic analyses of secondary referance materials
[truncated: 837 more rows]
